# Supplementary material for: Older Australians Can Achieve High Adherence to the Mediterranean Diet during a 6 Month Randomised Intervention; Results from the Medley Study
Source: Nutrients. 2017 May 24;9(6):534. doi: 10.3390/nu9060534 (PMC5490513; doi:10.3390/nu9060534)
Supplement: Supplementary file 1 [file nutrients-09-00534-s001.zip]

Archive with 4 entries (4 files):
- Supplementary File 4, Figure S1.pdf
- Supplementary File 2, Table S2.pdf
- Supplementary File 3, Table S3.pdf
- Supplementary File 1, MedLey Raw Data-Table S1.xlsx
