# Supplementary material for: Older Australians Can Achieve High Adherence to the Mediterranean Diet during a 6 Month Randomised Intervention; Results from the Medley Study
Source: Nutrients. 2017 May 24;9(6):534. doi: 10.3390/nu9060534 (PMC5490513; doi:10.3390/nu9060534)
Supplement: Supplementary file 1 [file nutrients-09-00534-s001.zip › Supplementary File 1, MedLey Raw Data-Table S1.xlsx]

## Sheet: 1. food intakes g
TABLE S1.1 MEDLEY RAW DATA, FOOD INTAKES IN GRAMS
StudyID	Gender (1=Male, 2=Female)	Age (y)	Diet (1=Med, 2=Hab)	Visit	Olive oil	Vegetables	Potato	Fruit (fresh, canned or dried, but not juice)	Legumes	Nuts	Total dairy	Cereals (rice, pasta, oats, porridge, breakfast cereal, other grains)	Bread (includes all types, rolls, wraps, crumpets, sandwich slice, white, wholemeal, multigrain, homemade etc.)	Fish and seafood	Meat (white and red)	Miscellaneous total	Egg and egg dishes	Red wine (any)	Sugar products (>50% sugar content, white, raw or brown sugar, jams/marmelades, honey, lollies)	Total beverages
Med001	2	68	2	1	24.3333	201	0	284.667	10	23.3333	204	114.667	59.6667	36.6667	0	521.333	35	0	0	2289.33
Med001	2	68	2	2	6	255	54	156.333	0	11.6667	216.333	154.667	0	72	0	196	79.3333	0	4.66667	2550
Med001	2	68	2	3	18.3333	645.667	111	338.667	0	62.6667	152	62.6667	13.6667	56	97.6667	22.6667	13.6667	0	0	2560
Med002	2	66	1	1	4.66667	165	33.3333	225.667	0	13.3333	390	57.3333	56.3333	81.6667	8.33333	165.667	53.3333	247.667	2.33333	1751.33
Med002	2	66	1	2	51.6667	209	43.6667	189.667	0	12.6667	298	56.6667	105.667	0	61	156.333	40.3333	206.333	27.3333	2487.67
Med002	2	67	1	3	60	188	33.3333	310.667	33	25	205.667	16	155	109.667	91	46.3333	32.6667	66	4.66667	2494
Med003	2	72	2	1	3	133.333	71.3333	187.333	40.6667	73.6667	389	35	47.6667	39.3333	123	287.667	0	49.6667	0	2004.33
Med003	2	72	2	2	0	39.3333	40.6667	345	0	20	294.333	67.6667	88.3333	24	95.3333	421.667	0	288.667	5.33333	2291.67
Med003	2	72	2	3	0	347.333	20.3333	187.333	0	9.33333	316.333	23.6667	84	33.3333	201.333	68	16.3333	49.6667	4.66667	2507.67
Med004	2	78	1	1	0	56.3333	51	328.333	0	0	601	48	64.6667	0	49.6667	158.667	42.6667	0	7	1087.67
Med004	2	78	1	2	12	119.333	60.6667	204	33.3333	6.66667	302.667	46	36	50	26.6667	487	0	0	5.33333	1333.33
Med004	2	79	1	3	36.3333	210.667	0	319	40	34.6667	320.667	45	29.3333	110	33.3333	24.6667	39.3333	0	0	1084.33
Med005	1	80	1	1	0	53.3333	122.667	386	0	0	847	52.6667	65.3333	0	49.6667	235.333	139.333	0	28.3333	1091
Med005	1	80	1	2	12	95.3333	60.6667	339.333	41.6667	36.6667	436.667	50	126	50	26.6667	596.333	0	0	35.3333	1083.33
Med005	1	81	1	3	42.3333	141	0	662	40	23.3333	449.667	100	117	83.3333	66.6667	66.3333	33.3333	0	26.3333	1333.33
Med006	2	82	1	1	0	136.667	0	318.667	147.667	31.3333	52.6667	33.6667	108.667	37.3333	102.333	215.333	13.3333	0	16.3333	1713.33
Med006	2	82	1	2	5.33333	147	30.3333	97.6667	63.6667	53	137.333	0	106	59	75	163.667	28.3333	54.3333	11	1820.33
Med006	2	83	1	3	22.6667	273.667	30.6667	159	57.3333	16.6667	134.333	33	69	31.6667	44.6667	204.667	30.3333	54.3333	47.6667	1383.33
Med007	1	81	2	1	0	70	0	325.667	0	0	360.333	118	22	0	128.333	364.667	0	396	0	1584.33
Med007	1	81	2	2	12	38.3333	16.6667	140	66.6667	0	369.667	165.333	55	58.3333	200	208.333	0	495	9	2680
Med007	1	81	2	3	0	131.667	81	175.333	133.667	0	235	149.333	60	0	239.667	184.333	0	330	0	2837.33
Med008	1	75	1	1	12	131	33.3333	262.667	0	5	36.6667	95	120	0	201.667	403.333	13.6667	338.333	7	1404.67
Med008	1	75	1	2	12	235.333	58.3333	297.333	0	20	313.333	130	25	86.6667	73.3333	327.333	21.3333	198	9.66667	1705
Med008	1	75	1	3	12	308.667	73.3333	322	20	33.3333	338	118.333	18	170	76.6667	105.333	16.6667	214.667	2.33333	2199
Med009	2	72	1	1	12	81	71.3333	244	0	0	379	200.333	80	110	65	248	0	123.667	0	1367.67
Med009	2	72	1	2	12	198.333	36.6667	307	0	0	341	76.6667	54.3333	73.3333	71.6667	282	13.6667	198	7	1140
Med009	2	73	1	3	12	248.333	88	266	20	33.3333	339.333	118.333	0	170	66.6667	117.667	8.66667	231	0	2189
Med010	1	82	2	1	31	219	158.333	293.667	0	19	6.66667	100	64	67.3333	132.667	25.3333	16.6667	193	9.66667	852.333
Med010	1	82	2	2	0	281.667	156	230.333	28.3333	0	0	45	92	113.333	210	0	0	208	7	676.333
Med010	1	83	2	3	34.3333	311	0	427	0	0	0	148.333	99.3333	41.6667	111	31.6667	0	173.333	9.66667	1173.33
Med011	2	76	2	1	32	146	0	188	0	10	6.66667	50	162.333	57.6667	128	110.667	16.6667	71	26.6667	1039.33
Med011	2	76	2	2	68.3333	282.667	46.6667	272.667	28.3333	79.6667	26.6667	0	120.667	121.667	119.333	76.3333	0	0	2.66667	1654.33
Med011	2	76	2	3	47	240.667	0	411.333	0	37	33.3333	0	94	70	110	71.3333	0	0	1.33333	1661.67
Med012	2	71	1	1	13.6667	425	40.6667	737	0	18.6667	175	40	61	130	0	132.333	0	0	0	1626.67
Med012	2	71	1	2	66.6667	305.667	0	401.333	0	20	77.3333	60	122.333	94.6667	0	452	0	123.667	2.33333	1453.33
Med012	2	71	1	3	60.6667	344.333	0	701.333	5	16	201.667	25	51.3333	52.3333	16.6667	105	13.3333	99	0	1866.33
Med013	2	68	1	1	6	46.3333	44.3333	243	0	6.33333	332	49.6667	88	39.3333	0	425	0	0	2.33333	1659.33
Med013	2	68	1	2	36.3333	223.333	0	282	70	39.3333	271.333	83	71.6667	50	33.3333	59.3333	0	39.6667	2.33333	1616.67
Med013	2	68	1	3	39.3333	231.333	0	506.667	50	23.3333	365	51	50.3333	26.6667	63.3333	102.333	101	49.6667	0	1892.67
Med014	1	76	2	1	0	270.333	101.667	98	0	40	135.333	40	34	22	156.667	289	12.3333	346.667	5	671.333
Med014	1	77	2	2	0	31.6667	67.3333	57	0	3.66667	133.333	35	60	16	93	400	21.3333	495	6.66667	1431
Med014	1	77	2	3	0	142	0	91.6667	0	0	108.333	26.6667	36.3333	0	120	118.333	95.6667	247.667	4.66667	840.333
Med015	2	68	1	1	0	125	67.6667	164.333	0	20	171.667	31.3333	26.6667	0	88	232.333	12.3333	0	32.3333	1020.67
Med015	2	68	1	2	6	213	81.6667	295.333	24.3333	25	312.333	30	42	31.6667	0	73.6667	42.6667	0	19	1400
Med015	2	68	1	3	30.3333	156.333	30.6667	282.333	0	60	414	211.667	48.6667	0	47.6667	81.3333	24.6667	49.6667	23	1533.33
Med016	1	74	2	1	3	264	50.3333	249.667	0	12	212.333	26	69.3333	90.3333	50	379.667	25.3333	0	22.6667	2271
Med016	1	75	2	2	0	328.333	83.3333	279.667	13.3333	10.3333	387	106.667	55	45	175	199	13.6667	371.333	4.66667	2255
Med016	1	75	2	3	0	222	76.3333	233.667	0	6.66667	253	120	67.6667	9	226.667	283.667	16.6667	198	2.33333	2229
Med017	1	76	1	1	0	16.6667	33.3333	352.333	46.6667	0	141.667	150	133	78	100	95	14.3333	0	9.33333	1055.67
Med017	1	76	1	2
Med017	1	77	1	3	72.6667	68.6667	0	369.333	83.3333	37.6667	390.333	50	82	98.3333	0	0	0	0	0	1314.33
Med018	2	66	2	1	0	80	13.3333	347	0	70.3333	399.333	60.6667	96	112.333	0	145	0	49.6667	48.3333	1745.33
Med018	2	66	2	2	6	103.333	0	326	0	35.6667	363.333	278.667	87.3333	0	100.333	190.333	13.6667	0	1.33333	1049
Med018	2	67	2	3	6	166	0	494	50	25	421.333	101.667	113.333	53.3333	0	99	12.3333	0	12	1591.67
Med019	1	74	1	1	24.3333	316.667	20	123.333	0	37.3333	713.667	20	139.333	123.333	40	212	33.3333	0	41	2176.33
Med019	1	74	1	2	53	340	0	340.667	0	28.6667	698.667	53	149	0	0	368.333	46.3333	0	23.3333	2526.33
Med019	1	74	1	3	39.3333	371.667	0	166	50	58.6667	944.333	75	120.667	68.3333	0	268.333	16.6667	0	42.6667	1941
Med020	2	65	2	1	0	106.333	0	398.333	9.33333	12	88.3333	150	50.3333	13.3333	108.333	278	29	247.667	21.6667	1672.33
Med020	2	65	2	2	6	28.6667	47	179.333	42.3333	12.6667	179	75.6667	45	91.6667	18.6667	183.333	0	264	9.66667	1346.67
Med020	2	65	2	3	0	136	0	386.667	50	0	252.667	46	70	30	50	252	12.3333	0	1.66667	1925
Med021	1	65	1	1	17	111.667	0	337.333	107	160	284.333	69.3333	126	93.3333	50	136	50	26.3333	32.3333	757
Med021	1	65	1	2	28.6667	193	0	420	68.3333	35.6667	518.667	86.6667	89	66.6667	76.6667	233.333	0	0	14.3333	1600
Med021	1	65	1	3	60.6667	188.333	113.333	625.333	83.3333	37.6667	386	123.333	128.333	123.333	73.3333	6.66667	38.3333	0	14.3333	983.333
Med022	1	71	1	1	3	154.333	33.3333	287.667	0	0	393.667	43.3333	53.6667	136.667	16.6667	240	53.3333	198	9.66667	1348.33
Med022	1	71	1	2	51.6667	216.333	64	195.667	0	12.6667	310.667	49.3333	147	0	81	194.667	40.3333	288.667	35.6667	1581.33
Med022	1	71	1	3	21.3333	112	50	314	0	23.3333	309	40	165.667	102	160	64.3333	32.6667	99	9	1523
Med023	1	69	2	1	0	174.333	23.3333	203	0	14.3333	103.333	60	75	60	69.3333	33.3333	0	869.333	0	1313.33
Med023	1	69	2	2	0	182.667	13.3333	280.667	0	0	291	51	66.6667	192	0	61.6667	0	618.667	0	1562.67
Med023	1	69	2	3	0	48	9.33333	119.667	3.33333	0	124	58.3333	99	56	107	85	0	141.667	0	850
Med024	2	76	2	1	0	175.667	183.667	87.3333	0	0	432.667	35	96.6667	0	150	213	0	0	0	2413.33
Med024	2	76	2	2
Med024	2	76	2	3
Med025	1	68	2	1	3	86.6667	0	318	73.3333	0	374	35	68	92.3333	0	199	0	99	0	1164
Med025	1	68	2	2	0	108.333	12.6667	187.333	0	108.667	559.667	60	84.6667	0	0	277.333	0	0	0	1608.33
Med025	1	69	2	3	0	94	0	252	143.333	50	8.33333	63.3333	129	31.6667	140	28.6667	98	99	0	1572
Med027	1	67	2	1	0	11.6667	0	398	0	11.3333	394	63.3333	125.333	0	0	581.333	0	231	0	1593
Med027	1	67	2	2	0	95.3333	189.333	313.667	14.6667	3.33333	438	66.3333	128.333	6.66667	0	204	0	280.667	7.33333	2258.67
Med027	1	67	2	3	0	112.667	0	215.667	0	7.33333	586.667	133.667	78	0	77.6667	99.3333	0	49.6667	2.33333	1637.33
Med028	1	71	1	1	0	186.667	189.333	209.667	66.6667	110	43.3333	10	104.333	114	133.333	197	0	462	7	1143
Med028	1	72	1	2	54.6667	244.333	0	512.333	166	49.6667	448.333	10	136	41.6667	0	110.333	36.6667	297	26.3333	1357.67
Med028	1	72	1	3	36.3333	220	94.6667	285.333	259.333	46.3333	455.667	10	121.667	41.6667	150	66.3333	58.3333	264	24	1499
Med029	2	67	1	1	0	353.333	0	101.333	0	89.3333	149	0	95	178.667	83.3333	237.333	65.3333	627	19.6667	1712
Med029	2	67	1	2	38	283.667	0	433.667	130.333	49.6667	363	0	91	100.333	63.3333	117	38	363	21.3333	1359.67
Med029	2	67	1	3	36.3333	189	94.6667	285	159.667	46.3333	376.667	0	94.6667	95	70	34	41.3333	264	19	1615.67
Med030	2	76	2	1	15.3333	549.667	0	463	139.333	16.6667	160	25	108.667	103	172.667	238	42.6667	0	6.33333	938
Med030	2	77	2	2	6	63.3333	0	328.333	0	7.33333	299.333	12	118.333	58.6667	0	484.667	39.6667	0	2.33333	1563
Med030	2	77	2	3	6	420.667	0	337.333	0	0	263.333	44.3333	111.333	28.3333	254.333	130	0	0	10	1318.67
Med031	2	65	1	1	0	227	41.3333	218	53.3333	4	252.667	44	94	0	161	151.667	28.3333	0	47.3333	2741
Med031	2	65	1	2	32	296	25	372.667	66.6667	20	278.667	55.3333	86.6667	50	60	43	19.6667	0	7	2743
Med031	2	65	1	3	33.3333	292.667	11.6667	278	25	34.6667	220	132.667	133.667	103.333	55	61.6667	16.6667	0	16.6667	2695
Med032	2	74	1	1	12	215.333	0	561.333	73.3333	82.6667	253	100	9	0	150	231.333	0	0	16.3333	2424.33
Med032	2	74	1	2
Med032	2	74	1	3
Med033	1	65	2	1	0	42.3333	10	78.3333	0	0	699	30	67.3333	33.3333	207.333	101.333	53.6667	0	7	917.333
Med033	1	66	2	2	0	69	0	140.333	0	0	527.667	49.6667	40	0	273.333	415	27.3333	0	1.33333	1920.67
Med033	1	66	2	3	0	38.6667	83.3333	13.3333	46	0	412	20	60	244	100	224.667	0	0	10.6667	638.667
Med034	2	69	1	1	3	436.667	55	192.333	0	23	120	56	12.6667	31.6667	228	176.333	16.3333	247.667	0	2183.33
Med034	2	69	1	2	18.3333	288.333	81.3333	184.667	0	18	279.667	33	71.6667	113	119.667	78.6667	10	198	0	2621
Med034	2	69	1	3	45.6667	254	0	244.333	41.6667	14	161.333	11	71.6667	186.333	83.3333	9.66667	19	0	0	2671.67
Med035	1	68	1	1	0	204	33.3333	150.667	22	129.333	85.3333	63.3333	195	0	67.3333	363.333	0	495	68	1921
Med035	1	68	1	2	25	256.667	0	383.333	110.333	50	347	60	100.667	92	75	58.3333	0	390	13.6667	1920.67
Med035	1	68	1	3	62.3333	334.333	0	367.333	8.33333	66.6667	402.333	37.6667	160.667	120	50	100.333	0	398	64.3333	2314
Med036	1	70	2	1	0	43.3333	33.3333	242.667	0	0	203.333	52.6667	0	0	100	587.333	0	132	0	2899.33
Med036	1	70	2	2	0	167	23.3333	99	0	8.33333	159.667	55	54	0	91.3333	552.667	0	0	2.33333	1967.67
Med036	1	70	2	3	0	90.6667	58.3333	195	66.6667	33.3333	84.6667	58.3333	75	0	92	67	0	99	0	1700
Med037	2	66	2	1	0	39.3333	0	479	33.3333	13.3333	656	0	43	31.6667	0	406.667	0	0	0	2746.67
Med037	2	66	2	2	1.66667	179.333	0	542.667	66.6667	8.33333	510	81.6667	0	76.6667	0	147.333	16.6667	0	0	2529.33
Med037	2	67	2	3	6	77	0	627.667	0	11.6667	656	0	29.3333	0	0	379.667	66.6667	0	0	2597.67
Med038	2	65	1	1	1.66667	162.667	35.6667	230.667	0	8	402.667	122.667	64.3333	0	8.33333	197.333	47.3333	181.667	12	2135.67
Med038	2	65	1	2	32	264	47.3333	335.333	26.3333	45.3333	348.667	144.333	40.3333	251	0	22	0	49.6667	19	1991
Med038	2	65	1	3	36.3333	242.667	31	523.333	25	32	506	53.3333	53.6667	138	0	28	0	206.333	12	2226.33
Med039	1	66	1	1	0	45.3333	0	501.333	0	91.6667	101.333	36.6667	82.3333	0	0	393	24.6667	0	6.66667	3168.33
Med039	1	66	1	2	38	238.667	0	586.333	0	50	250.667	105	286	73.3333	33.3333	54	0	0	0	2650.67
Med039	1	66	1	3	33.3333	295	31	606.333	33.3333	23.3333	239	91.6667	150	41.6667	54.6667	39.3333	0	0	0	2450
Med040	1	76	1	1	0	138.333	40.6667	359.667	0	23.3333	575.333	185.333	99	117.333	103.333	184.667	13.3333	0	1.66667	1676.33
Med040	1	76	1	2	33.3333	36	0	562.667	41.6667	50	687.333	104.667	94.6667	31.6667	75	484.667	0	0	6.66667	2012.67
Med040	1	76	1	3	60	126.667	78.3333	194	23.3333	41.6667	702.667	54.3333	125.333	48.3333	90	180	0	0	16.3333	1166.67
Med043	1	69	1	1	9	230.333	74.6667	213.667	140	24.3333	69.6667	94.6667	79	0	37.3333	430.667	48	36.3333	12.6667	1979
Med043	1	69	1	2	66.6667	252.667	31	326.667	25	46	88.6667	38	68.6667	67.3333	37.3333	295.667	0	36.3333	1.33333	2270.67
Med043	1	69	1	3	36.3333	172.667	0	264.333	0	32.6667	91.3333	42.3333	67.6667	58.6667	0	248.667	46.6667	49.6667	0	1655
Med044	2	67	1	1	11.3333	272.667	71.3333	344	70	21.6667	350.667	113.333	98.6667	22.6667	33.3333	415	48	39.6667	1.33333	1493.67
Med044	2	67	1	2	57.6667	308	0	502.667	50	33	420	107	80.3333	40.6667	41.6667	349.333	40	99	0	1117
Med044	2	68	1	3	24.3333	180	0	453.333	0	46.3333	278.667	101.667	71.3333	58.6667	0	173.667	33.3333	99	0	1067.67
Med045	1	68	1	1	0	196.333	0	242.667	0	4.33333	301.333	29.6667	38.3333	29.6667	70	206.667	0	47.3333	36	1534.67
Med045	1	68	1	2
Med045	1	68	1	3
Med046	1	67	1	1	0	164	208	350	0	16.6667	661.667	38	59.6667	90.3333	58.3333	364.667	133.333	0	12.6667	1291.67
Med046	1	67	1	2	97	304.667	144.333	578.333	42.6667	60	316.667	50	97.3333	91.6667	83.3333	74	0	0	19	2141.33
Med046	1	67	1	3	48.6667	232	152.667	488.333	83.3333	48.3333	430	38	127	78.3333	49.6667	63	0	66	0	1203
Med047	2	73	2	1	0	270.333	101.667	98	0	40	134.667	40	34	30	140	304.333	12.3333	214.667	10	854.333
Med047	2	73	2	2	0	27	118	57	0	3.66667	68.3333	25	60	16	126.333	340	21.3333	123.667	6.66667	1173.33
Med047	2	73	2	3	0	141	26.6667	83.3333	0	0	113.667	20	46	0	120	202.667	95.6667	148.667	4.66667	1140.33
Med048	1	65	2	1	2	33.3333	0	75.3333	0	20.3333	56	128.333	113	94.3333	57.3333	119.667	24.6667	330	2.33333	601.667
Med048	1	66	2	2	0	138.667	124	64.6667	29.3333	7.33333	20.6667	6.66667	110	60	150	210.667	45.6667	247.667	9	889
Med048	1	66	2	3	0	76.6667	10	190	0	8	72	106.667	26.6667	43.3333	150	29	0	148.667	0	884
Med049	1	66	2	1	0	190.333	71.6667	208.667	0	11.6667	558.333	71.3333	69.3333	20	137.333	149	0	0	8.33333	1785
Med049	1	66	2	2	0	73.6667	0	441	5.33333	26	574.333	33	206.333	76.6667	98	343.667	0	49.6667	7	1067.67
Med049	1	66	2	3	0	125.667	61.6667	575	30	33.3333	342.667	33	105	0	180	183	0	0	12	1981.67
Med050	2	70	2	1	0	294.333	30.6667	487.333	0	15	356	109.667	46	20	10.6667	342.333	0	0	0	1331
Med050	2	70	2	2	0	117.333	61.3333	512.333	0	10	343.667	70.3333	58.3333	16.6667	76	207.667	42.6667	0	0	1006.67
Med050	2	70	2	3	7.66667	299.667	23.6667	470.333	0	62.6667	351.667	133.333	42.6667	41.6667	83.3333	291	0	0	0	1333.33
Med051	2	70	2	1	0	163.667	0	29.3333	0	0	141	15	81	138.667	0	424.333	23.6667	19.6667	0	1576.67
Med051	2	71	2	2	1.66667	165	62.3333	484.333	0	0	179.667	75.6667	35	0	106.667	79.3333	13.6667	0	0	1442.67
Med051	2	71	2	3	12	185.667	143	68.6667	28.3333	4.66667	274.667	20	48.6667	102.667	50.3333	289.667	0	0	0	1325
Med053	2	66	2	1	0	50	50	99	0	0	178	88.3333	70	83.3333	101.667	427	74	0	8.66667	1993.67
Med053	2	66	2	2	0	216.333	108	320.333	28.3333	5	50.6667	0	22.6667	113.333	121	330.667	70	0	9	1529.33
Med053	2	67	2	3	0	276	66.6667	234	100	0	166.667	25	0	0	114	215	46.6667	175	0	1024.67
Med054	2	66	1	1	1.66667	198.667	0	251	0	0	129.333	41.6667	9.66667	102.333	100	333	20	0	19	2022.67
Med054	2	66	1	2	7.66667	96	0	582.333	0	11.6667	255.667	0	52.6667	100	0	346.667	33.6667	0	0	1171.33
Med054	2	66	1	3	15.3333	162.333	0	397	0	69.6667	281	22.6667	34.6667	78.3333	50	692.333	0	0	0	1963.33
Med056	2	77	2	1	0	131.667	23.6667	193	0	16	334.667	24	81.3333	18.6667	138.333	467.667	0	330	0	2441
Med056	2	77	2	2	12	249.333	47.3333	407	0	23.6667	326.667	58.3333	27	0	156.333	72.3333	13.3333	330	0	2133.33
Med056	2	77	2	3	0	111	91.3333	288	0	33.3333	238.333	15	18	50	156	152.667	0	99	0	2477
Med059	2	70	1	1	0	61.3333	47.3333	308.667	50	0	100.667	28.6667	27.6667	0	16.6667	96.6667	0	0	18	302
Med059	2	70	1	2	27.3333	318	0	613.333	115	20	317	114.333	57.3333	41.6667	19.6667	117.333	0	148.667	3.33333	1335
Med059	2	71	1	3	25.6667	344.333	0	177	0	10	188.333	48.3333	113	99	88.3333	78.6667	0	148.667	11.6667	1387
Med060	2	65	1	1	0	74.6667	71.3333	37	0	7	182	106.333	24.3333	0	56.3333	475.333	66.6667	0	11	1617.67
Med060	2	66	1	2	25.6667	435	0	200.333	100.333	4.33333	140.667	105.333	104.333	93.3333	0	227	0	49.6667	15.6667	1368.67
Med060	2	66	1	3	7.66667	303	0	500	0	11	295.333	35	99.3333	0	132.667	131.667	13.3333	49.6667	8.33333	1270.67
Med061	1	70	2	1	0	230	133.333	179.667	0	0	334.333	135.333	73	0	290.667	289	40	0	0	632.667
Med061	1	70	2	2	0	64.3333	0	65.6667	0	25	228.667	50	110	58.3333	33.3333	136.667	0	0	0	505
Med061	1	70	2	3	0	95.3333	66.6667	36.6667	0	0	111.333	65	20	0	108.333	209.333	42.6667	0	2.66667	815.333
Med062	2	72	1	1	0	72.6667	63.3333	208	0	0	38.3333	0	38	0	0	76.3333	10	0	9.33333	388
Med062	2	72	1	2	42.3333	318	54	389	25	26.6667	238.333	0	91	53.3333	59.3333	232	0	0	37	2887.33
Med062	2	72	1	3	60.6667	219	219.333	500.333	75	29.3333	207.333	0	64.3333	36.6667	0	103.667	39	0	30.3333	1846.67
Med063	2	73	2	1	6	201	83.3333	398.333	0	14	1077	52.6667	46.3333	39.3333	81	157.667	19.6667	0	2.33333	1693.33
Med063	2	74	2	2	3	277.333	0	417.667	20.3333	8	599.333	44.3333	48.6667	18.3333	93.3333	63	0	0	0	2538.33
Med063	2	74	2	3	9	228	38.6667	549	0	16.6667	701.333	41	32.6667	64	42.3333	166.667	19	0	15.3333	1985.33
Med064	2	76	1	1	1.66667	86.6667	0	87	0	10.6667	72.3333	23	28.6667	31.6667	13.3333	1.66667	0	57.6667	0	396.667
Med064	2	76	1	2	42.3333	152.667	54.3333	181.333	33.3333	92.3333	147.667	39.3333	42	85.3333	18.6667	191.667	0	99	2.33333	1585
Med064	2	76	1	3	24.3333	189	0	147	0	75	148.667	142.667	22.3333	0	10	211.333	51.6667	99	0	1274.33
Med065	2	69	2	1	0	281.667	91.6667	287.667	0	0	294	104.333	33	0	192.333	80	41	0	12.3333	3176.33
Med065	2	69	2	2	0	151.333	0	186.667	0	10	322.333	41.6667	0	23	100	371.667	0	0	13.6667	4088.67
Med065	2	69	2	3	0	205.333	18.6667	253.667	0	5	370	57.3333	9.33333	0	78.6667	179	0	0	105.333	2930.33
Med066	2	66	1	1	0	26	0	120	0	0	0	0	24	16	93.3333	120	0	0	9.33333	352
Med066	2	66	1	2
Med066	2	66	1	3
Med067	2	74	1	1	12	143	35.6667	337.333	0	16	433.333	30	18	47.3333	42	42.3333	60.6667	82.6667	0	2034.33
Med067	2	74	1	2	10.6667	525	0	380	77.6667	18.6667	455.333	46	18	81.6667	66.6667	11.3333	42.6667	99	0	1789.33
Med067	2	74	1	3	12	407	0	326.333	13.6667	56.6667	495.667	105.667	36	66.6667	0	72.3333	27.3333	248.333	0	1833.33
Med068	1	78	1	1	0	110	0	97	0	0	162.667	11.3333	24	0	50	37.6667	0	0	0	658
Med068	1	78	1	2
Med068	1	79	1	3
Med069	2	72	1	1	0	110	0	50.3333	0	0	109	9.66667	24	0	50	37.6667	0	0	1	486.333
Med069	2	72	1	2
Med069	2	72	1	3
Med070	2	70	2	1	11.3333	166	5.66667	287	15.3333	0	108.667	28.3333	47	81.6667	0	88.6667	20	123.667	2.33333	1955
Med070	2	70	2	2	12	409.667	0	419	0	70	293	55	60.3333	141.333	0	159	43.3333	0	0	3770
Med070	2	70	2	3	32	250.667	0	335	41.6667	10.3333	148.333	36	31	166.667	0	263	76.3333	0	7.66667	2814.67
Med072	2	65	1	1	1.66667	33.3333	40.6667	8.33333	0	3	131	16.6667	20.6667	35	50	15.3333	0	132	0	1306
Med072	2	65	1	2	33.3333	233.667	30.6667	289.667	12.6667	28.6667	316	63.3333	55.3333	83.3333	24	40.6667	66.6667	181.667	18	3055.67
Med072	2	65	1	3	38	127.333	40.6667	329.333	14.3333	20.6667	186.333	16.6667	125.333	63.3333	59.6667	174.333	13.3333	148.667	12	3450
Med073	2	75	2	1	12	152.333	71.6667	220	73.3333	16	204.333	10	82.3333	139.333	47.3333	135.667	16.6667	66	0	2175
Med073	2	75	2	2	9	192.333	96	320.667	63.3333	7	143.667	16.6667	84.6667	88.6667	0	197	0	0	0	2152.67
Med073	2	75	2	3	0	228.333	0	194	16	4.66667	214.667	26.6667	140.667	21.3333	99.3333	191.667	23.3333	0	0	2419.33
Med074	1	68	2	1	0	94.3333	0	22	0	0	231.667	30	83	66.6667	16.6667	117.667	0	0	18.3333	963.333
Med074	1	68	2	2	0	53.3333	0	16.6667	0	32.6667	506.333	85.3333	44	26.6667	0	139.667	0	0	11	750
Med074	1	69	2	3
Med075	1	82	2	1	0.666667	16.6667	0	383.333	0	16	348	62	22	0	0	470.333	0	0	0	1544
Med075	1	82	2	2	3.66667	225.667	81.6667	416.333	0	49.3333	387.667	223	46	135	0	169	24.6667	0	0	1503
Med075	1	82	2	3	0	355	0	250	142	58	636.333	125.333	75	70.6667	53.3333	126.667	0	0	0	1858.33
Med076	2	64	2	1	5.33333	339.667	0	209.333	28.3333	10	56.3333	31.3333	87	113	29.6667	141.333	32.6667	82.6667	0	1494.67
Med076	2	65	2	2	1.66667	100.667	0	150.667	0	25	240.667	100	84.6667	86.6667	46	145.333	109.333	0	0	1034.33
Med076	2	65	2	3	15.6667	193	0	287.667	3.33333	0	49	46.6667	70.6667	81.6667	65	117.667	33.6667	74.3333	0	1431.67
Med077	1	79	1	1	0.666667	1370.67	68.6667	371.333	7.33333	9	61	50.6667	19.3333	0	0	120.333	0	19.6667	0	337
Med077	1	79	1	2	68	343.333	0	410	38.3333	86	182	102	161.333	38.3333	33.3333	640.333	35	99	0	1767.33
Med077	1	80	1	3	54	485.667	0	311.333	20.6667	93.6667	170	87.6667	139.333	101	30	484	0	95.6667	40.6667	1980.67
Med078	1	77	2	1	9	193.667	78	552.667	0	63	491.667	70	84	27	53.3333	180.333	0	0	8.33333	1773.67
Med078	1	78	2	2	15.3333	143.333	96.6667	578	0	30	266	65	46.6667	0	63.3333	171.667	33.3333	0	1	1401.67
Med078	1	78	2	3	0	191.667	83.3333	337.667	0	27.6667	240.667	80.6667	111	0	13.3333	171	0	0	11.3333	1633.33
Med079	2	79	2	1	9	165	83	563.333	0	0	98.3333	0	158.667	26.3333	50	172.333	0	0	15	1446.33
Med079	2	80	2	2	9	161.667	73.3333	529	0	0	312.667	0	84	0	63.3333	212.667	36.6667	0	15	1000
Med079	2	80	2	3	12	171.667	83.3333	439.667	0	0	246	0	123.333	0	16.6667	108	0	0	23.3333	946.667
Med080	1	67	1	1	0	275	0	443.667	0	1.66667	224.333	40	139.667	0	167	416	8	0	9.66667	827.333
Med080	1	68	1	2
Med080	1	68	1	3	15.3333	51	0	279.667	0	0	359	72.3333	31.6667	85	208	118.333	0	0	0	1277.67
Med081	2	72	2	1	12	316.333	51.6667	136.667	0	12	182.667	83.3333	25.6667	37.6667	60.6667	302.333	10	198	0	1673.67
Med081	2	73	2	2	0	251	47.3333	200	0	10	248.333	74.3333	31.6667	93.6667	83.3333	8.33333	39.3333	166	7	1233.33
Med081	2	73	2	3	18.3333	174.667	0	192	0	16.6667	342	248.333	44.6667	23.3333	40	274.333	24.6667	0	9.66667	2089.33
Med082	1	69	2	1	6	146.667	132.667	145	0	33.3333	54	0	51	113.333	143.333	160	0	264	8.33333	1603
Med082	1	70	2	2	0	203.333	83.3333	50.6667	0	0	76.6667	6.66667	55.3333	10	98.3333	114.667	16.6667	0	7	1750.67
Med082	1	70	2	3	0	61	0	180	0	0	100.333	63.3333	12.6667	16.6667	156.667	407.667	32.6667	66	4.33333	2144.67
Med083	2	77	1	1	0.666667	125	33.3333	164.667	43.3333	9	598.333	66.3333	69	46.6667	65.3333	96	73	82.6667	0	1734.33
Med083	2	77	1	2	21.3333	280.333	0	328.333	0	13.3333	343.333	10	127	163.333	0	39.3333	0	0	2.33333	2000
Med083	2	77	1	3	38	299.667	19	495	41.6667	20	282.667	0	83	208.333	0	3	0	0	0	1666.67
Med084	2	68	1	1	1.66667	110	40.6667	420.333	0	0	116.667	57	79	0	66.6667	369	0	0	0	1657
Med084	2	68	1	2	18.3333	282	0	120.333	33	10	299.333	158	26	0	0	283.667	0	0	20	1767.67
Med084	2	68	1	3	9	135	0	251	107.333	38.3333	263.333	28.3333	30	100	92	101	0	148.667	9.66667	2121
Med085	2	68	1	1	0	211.667	36	392	0	0.333333	228.333	39.6667	82	0	174.333	365	8.33333	0	15.6667	537.667
Med085	2	68	1	2
Med085	2	68	1	3	54.6667	129.667	6.66667	254.667	5	0	310	45	71.6667	49.6667	0	30.6667	78.6667	0	8.33333	820
Med086	1	66	1	1	0	142.333	134.667	115.667	0	0	290	30	70	0	83.3333	406	0	0	31.6667	2550
Med086	1	66	1	2	18.3333	116.667	56	156.667	0	9.33333	336	110	70	0	219.333	307.667	0	0	42.3333	1201.67
Med086	1	66	1	3
Med087	1	86	1	1	0	467.667	41.6667	693.667	0	3.33333	217.667	83.3333	116.667	53.6667	0	180	134.667	0	22	1343.67
Med087	1	86	1	2	11.3333	127	40.3333	396	0	21.6667	332	32.3333	113.333	83	0	322	0	0	32	1494.33
Med087	1	86	1	3	25.6667	116	40	588	0	23.3333	290	93.6667	141.333	228	0	65.3333	0	0	17	1609
Med088	2	67	1	1	12	167	42.6667	355.667	76.6667	18	550.333	27.6667	82.6667	79	0	134.333	48	0	19.3333	984.667
Med088	2	67	1	2	26.3333	164.333	0	246.667	0	11.6667	286.667	86	81.6667	81.3333	0	166	33.6667	0	22.3333	1126.67
Med088	2	67	1	3	0	216.333	22.3333	286.333	56	16	363	21.3333	66.3333	37	0	88.3333	39.3333	0	2.33333	879.667
Med089	2	65	1	1	0	163.667	31	182.667	0	57.6667	238.333	30	41.3333	93.3333	28	266.667	42.6667	66	1.33333	1516.67
Med089	2	65	1	2	51.6667	105.667	94.6667	247	0	75	238.667	50	64	93.3333	156.667	50	76	198	1.33333	1933.33
Med089	2	65	1	3	30.3333	116	166	411.667	41.6667	75	228.333	41.6667	101.333	119.667	50.6667	65.6667	54.6667	148.667	4.66667	2266.67
Med090	1	65	1	1	0	49	8.33333	309.667	0	0	53.3333	115	51.6667	0	0	336	0	0	7.33333	1508.67
Med090	1	65	1	2	6	33.6667	0	223.333	0	13.3333	504.667	116.667	56.3333	21	0	574.667	16.6667	0	4.33333	1771.33
Med090	1	65	1	3
Med091	1	68	1	1	0	109.333	0	466.667	0	9.33333	360.667	110.667	75.6667	70	0	548.667	88.6667	214.667	8.66667	2291.33
Med091	1	68	1	2	38	269.667	0	382.667	80	18	455.667	169.333	157.667	91.6667	76.6667	182.333	0	247.667	15.6667	1755
Med091	1	69	1	3	42.3333	154.667	94.6667	492.333	83.3333	65	430.667	158.333	145.667	96.6667	0	163	12.3333	198	2.33333	2230.33
Med092	2	68	2	1	0	118	77.6667	224.667	66.6667	4.66667	205.333	42	95.3333	0	86.6667	230.667	54.6667	0	2.66667	1987.67
Med092	2	69	2	2	0	186.333	103.667	349.333	26.3333	0	213.667	193.333	56	0	22.3333	577.667	32	0	0	1766.67
Med092	2	69	2	3	0	145.333	0	303.667	0	0	124.667	20	132.667	133.333	29.3333	147.667	0	0	32.6667	1515.67
Med093	1	76	1	1	0	0	0	139	0	0	100.333	336.333	138.333	0	2.33333	312	0	198	5.66667	1824
Med093	1	76	1	2	35	174.333	40.6667	251	153	43	224.667	20.3333	85.3333	31.6667	79	57.3333	32.6667	198	8	2003.33
Med093	1	76	1	3	33.3333	134	0	313	20	40.3333	433	31	169	45.6667	86.3333	62	7.66667	247.667	14.6667	2113
Med094	2	74	1	1	0	0	0	94.3333	0	2	99.3333	216.333	94.3333	0	0	296.333	0	198	2.33333	1528.33
Med094	2	74	1	2	24.3333	110	40.6667	179.667	84.6667	43	292	20.3333	62.6667	31.6667	75.6667	55.6667	32.6667	247.667	5.66667	1691.67
Med094	2	74	1	3	21.3333	115.333	0	254	20	40.3333	434	31.6667	116.667	27.6667	58.3333	41.6667	17.6667	247.667	13.6667	1394.33
Med097	1	75	1	1	0	299	184.333	348.667	0	6	360	143.333	139.333	45.6667	272	231.333	0	165.333	3.66667	2229
Med097	1	75	1	2	7.66667	84.3333	0	249.333	33.3333	59.6667	466.667	112	50	0	125.333	544	37.6667	324.667	0	2020.33
Med097	1	75	1	3	6	36.3333	0	316.333	0	6.33333	290.667	100	44	0	0	287.667	0	346.667	0	1150
Med098	2	70	1	1	0	181.333	41	324.333	0	7	348.667	24.6667	55.6667	42.3333	183.333	394	0	0	0	1545.67
Med098	2	70	1	2	0	101.333	0	334.333	7	0	252	40	4.66667	47.3333	79.3333	658.667	33.3333	0	5.66667	1470
Med098	2	70	1	3	18.3333	72	0	564.333	46.6667	11	200.667	63	5	23	8	512.667	0	50	6	1721.67
Med099	2	67	2	1	0	183.333	26.6667	205.333	0	10	339.667	58.3333	70	204	0	284.667	7	0	8.33333	1007.67
Med099	2	67	2	2	1.66667	135.667	0	182	0	10	360.667	18	40.6667	46.6667	0	349.667	32.6667	0	3.66667	1118
Med099	2	67	2	3	0	169.667	0	364.333	0	16.6667	257.333	51.6667	92.6667	0	63.3333	240.333	0	0	16	2067.33
Med100	1	68	1	1	0	34.6667	12	248	0	3	70.6667	66.6667	135	0	16	438	58	247.667	0	2083.33
Med100	1	68	1	2	15.3333	7.33333	0	134.333	0	26	170	0	116.667	0	0	623.667	16.3333	0	26.6667	2000
Med100	1	68	1	3	36.3333	550.667	63.3333	299.333	91.6667	137	170	0	123.333	33.3333	96.6667	68.3333	16.6667	198	19	1536
Med101	1	67	1	1	6	349.667	0	517.667	0	0	94.3333	53.3333	71.6667	66.6667	0	192.333	0	0	27	643.333
Med101	1	67	1	2	9	161	23.3333	443.667	126.333	16.6667	178.333	0	90	31.6667	0	192.667	0	0	11.3333	1350
Med101	1	68	1	3	9	80.6667	0	274.667	100	20	218.667	63.3333	46.6667	11.3333	0	514.333	0	0	4.66667	1564.33
Med102	1	67	2	1	2.33333	171.667	94.6667	395.667	0	2.33333	40.6667	149.667	124	40	74.3333	334.333	66.6667	0	2.33333	596.333
Med102	1	68	2	2
Med102	1	68	2	3
Med103	2	77	1	1	16.6667	369	15	383.333	183.333	6.66667	289	223.333	21	16.6667	56.6667	124.333	58.3333	0	6	1583
Med103	2	77	1	2	33.3333	327.333	66.6667	140	195	73.3333	362	124.333	21.6667	69	60	62	57	0	0	1722.67
Med103	2	77	1	3	44.6667	417.333	0	504.333	50	118.333	439.333	117.333	23.3333	73.3333	0	71.6667	85.3333	0	7.66667	1793.33
Med104	1	76	1	1	0	53.6667	94.6667	414.333	66.6667	0	568	41	120	63.3333	0	83.6667	24.6667	0	39.6667	2450
Med104	1	77	1	2	0	72	0	198	15	64.3333	581.333	47.6667	330.667	0	0	674	38.6667	0	40	868
Med104	1	77	1	3	39.3333	113	0	416.333	36	36.3333	697	30	182.667	110	0	3.33333	16.3333	0	40	1801.67
Med105	2	70	1	1	6	172.333	66.6667	258.667	0	0	147.333	76.6667	28	0	159.333	470.667	0	0	22	739.667
Med105	2	70	1	2
Med105	2	70	1	3
Med106	1	66	2	1	0	5	0	148.333	0	4.33333	66.3333	0	98	140	0	242.667	0	0	16	2228.67
Med106	1	66	2	2
Med106	2	74	2	3	0	144	0	258.667	0	4.33333	16.6667	63	103	121	0	157	33	0	14.3333	3787
Med107	2	73	2	1	12	88.3333	16.6667	292.667	0	25	95	214.667	132	36.6667	96.6667	261.667	0	0	20	3211.67
Med107	2	73	2	2	0	47	33.3333	208.333	0	27.3333	97.6667	80	73.3333	30	83.3333	433	38.3333	0	28.3333	2594.33
Med107	2	80	1	3	0	70	20	179	0	23.3333	81.6667	56.6667	78.3333	50	66.6667	393	0	0	13.6667	2592
Med108	2	80	1	1	0	76.6667	0	495	0	61.3333	131.667	0	69.6667	31.6667	26.6667	280.333	27.3333	247.667	0	1476.33
Med108	2	80	1	2	0	104	0	397.333	0	39	244.333	18	80	43.3333	50	412.333	0	132	0	1433.33
Med108	2	70	1	3	42.3333	385.667	0	426.333	41.6667	58.3333	150	9.33333	59.6667	120	60	85	16.6667	198	0	1181.67
Med109	2	69	1	1	6.66667	148.667	99.6667	326	0	0	338	23.3333	39.6667	0	112.667	151.667	0	214.667	18.3333	1461
Med109	2	70	1	2	7.66667	626.333	50.6667	387.667	56	48.3333	455.667	33.3333	103.667	0	33.3333	161.667	0	99	14.3333	1372
Med109	1	67	1	3	6	184	57	338.667	0	10	449.333	116	54.3333	118.333	92.3333	145.667	0	99	34.6667	1353.33
Med110	1	66	1	1	4.66667	68.6667	43.3333	73.6667	80	0	419.667	76.6667	130.667	60	0	484.667	27.6667	247.667	15.3333	1509.33
Med110	1	67	1	2	48.6667	206.333	0	235.667	57	10	451.667	65.3333	63	60	0	302	0	198	9	1434.33
Med110	2	69	2	3	54.6667	282.333	0	775	92.3333	116.667	469.333	86.6667	92.6667	26.6667	46.6667	10.6667	39.3333	321.667	4.66667	1413.33
Med112	2	68	2	1	18.3333	383	0	206	0	49.3333	630.667	23.6667	26.3333	86.6667	76.6667	295	0	24.6667	42.3333	1776.33
Med112	2	69	2	2	6	508.667	0	55.6667	0	0	484.667	42.3333	37	58.3333	0	523.667	33.3333	0	16.3333	2104.33
Med112	2	69	2	3
Med113	2	69	1	1	0	100.667	9.33333	373.333	0	15.3333	559.333	53	49.3333	160.333	13.3333	344.667	0	0	5	1509.67
Med113	2	69	1	2	6	338.667	20	170.333	0	23.3333	365.333	122.667	22	41.6667	93.3333	68	104.667	0	0	1704.33
Med113	2	69	1	3	48.6667	199	0	1028	46.6667	116.667	447	192	49	106	31.6667	26.6667	26.6667	0	0	2484
Med115	2	73	1	1	0.666667	374	0	639	0	13.3333	186.333	53.3333	28	73.3333	88.3333	88.3333	0	0	0	1851.33
Med115	2	73	1	2	42.3333	371.667	0	605	115	20	269	35.3333	96	103.667	51	7	0	66	0	1923.67
Med115	2	74	1	3	70.6667	330	0	1083.67	41.6667	233.667	310	125.333	84.6667	90	59.3333	5	19.6667	99	0	2234
Med116	1	68	2	1	7.66667	162.333	40	536.667	0	0	123.333	131.667	71	0	94.6667	147.333	0	255.667	47.6667	911.333
Med116	1	68	2	2	6	271	0	174.667	80	58.3333	34.6667	45.3333	121	108.333	0	197.333	0	297	7	1838.33
Med116	1	74	2	3	0	263.667	0	179.333	0	0	216.333	17.6667	122.333	89.3333	160	121.667	0	490	15.6667	2321.33
Med117	1	65	1	1	54.6667	199	137.333	199.667	14.3333	135.333	207.333	7.66667	72	68.3333	64.3333	185.667	40.3333	69.3333	2.33333	1980
Med117	1	65	1	2	30.3333	481.667	94.6667	853	66.6667	33	66.6667	0	115	156.667	48	181.667	0	198	3.33333	866.667
Med117	1	65	1	3	42.3333	445	50	415	350	20	471.667	35	266.667	178.333	0	28.3333	0	44.3333	2	954.667
Med118	2	75	2	1	0	335.333	10.6667	300.333	19.6667	3	518.667	0	197	0	46.6667	281.333	42.6667	0	54	1349.67
Med118	2	75	2	2	0	406.667	0	417	7	8.33333	598	0	184.667	0	0	215	80	0	5.33333	1158
Med118	2	76	2	3	0	212.667	0	440.333	7	0	631.667	0	235.667	0	0	137.667	93	0	9	1285
Med119	1	73	2	1	6	177.667	63.3333	317	0	25	452.667	60	81.3333	0	0	146	42.6667	0	0	1940.33
Med119	1	73	2	2	0	157	0	314.667	0	0	342	84	79.6667	0	105.333	35	36.6667	0	3.33333	1522.33
Med119	1	73	2	3	7.66667	136	0	243	0	0	139	63.3333	53	0	96	62.3333	57.6667	0	0	1321
Med120	2	69	2	1	7.66667	139	63.3333	254	0	28.3333	452.333	30	102.333	0	55	521	42.6667	0	0	1552
Med120	2	69	2	2	4.66667	124.667	0	242.667	0	0	468.333	30	136.667	0	62.6667	68	42.6667	0	9	1963.67
Med120	2	69	2	3	12	141.333	0	298.333	0	0	135	33.3333	39.3333	0	73	117	36.3333	0	0	2096.67
Med121	2	67	1	1	0.666667	363.333	70.3333	195.333	1.66667	0	125.667	17.3333	73.6667	45	141.667	349.667	2.33333	0	7.66667	1825
Med121	2	67	1	2	61.3333	427	12.6667	278.667	40	25.3333	259.333	174.333	65	51.6667	0	143	20	0	0	1190.33
Med121	2	67	1	3	50	295.667	0	398.667	103.333	54.6667	371.667	58	59	103.333	0	81	21.3333	41.3333	0	1536.67
Med122	2	72	2	1	0	7	122	77.3333	0	17.3333	20	28.3333	57.6667	0	54	664.333	0	396	0	1612
Med122	2	72	2	2	0	126	18.3333	175.667	0	74	20.6667	76.6667	19.3333	0	177.333	393.333	18	297	2.33333	1803.33
Med122	2	72	2	3	0	206.667	39.3333	214.667	0	25	0	109.333	7.66667	0	0	215	12.3333	264	0	2204
Med123	1	72	1	1	0	135.333	0	71	160	0	125	238.333	118	0	123.333	516	38.3333	0	5.66667	1440.33
Med123	1	72	1	2	54.6667	213.333	0	264	136.667	54	263	80	155	75	28.3333	204	41	0	31.3333	1342.67
Med123	1	73	1	3	36.3333	325	0	418.667	39.3333	147	188.333	50.6667	77	66.6667	0	337.333	38	0	7	1173.33
Med124	2	74	1	1	0	143	0	103	120	0	214.333	213.333	68.3333	0	40	331	38.3333	0	3.66667	1803
Med124	2	75	1	2	54.6667	213.333	0	299	138.333	64.6667	266.333	38	83.3333	75	28.3333	185.333	35.6667	0	13.6667	1976
Med124	2	75	1	3	24.3333	228.667	34.6667	280	36	12.6667	223.333	31.6667	49.3333	66.6667	0	144.333	71.3333	0	8	1274.67
Med125	1	69	2	1	6.66667	359	0	526	99.6667	15.3333	501.667	36.6667	67.3333	87.6667	112	359	33	61	3	2367
Med125	1	69	2	2	1.66667	237.333	0	540.333	48.3333	31.6667	668	164.333	86	87.3333	182	146.667	42.6667	82.6667	0	2056
Med125	1	69	2	3	9	113.667	0	447.667	25	24.3333	335.667	41	144.667	131.667	49.3333	217	0	0	0	2189.67
Med126	1	66	2	1	0	3.33333	0	236.333	141.667	20.3333	192.667	52	55.3333	0	0	821.667	32.6667	148.667	0	1055.67
Med126	1	66	2	2	0	23	0	253	31	70.3333	148.333	262	215.333	31	66.6667	269	0	148.667	0	1262.67
Med126	1	66	2	3	0	92.3333	0	200.667	0	0	204.333	361	0	0	0	483	110.667	0	0	1804.33
Med127	1	68	2	1	0	41.6667	47.3333	229.667	66.6667	16.6667	263.333	86.3333	18.3333	30	133.333	460	0	105.667	38.3333	1137.67
Med127	1	68	2	2	0	103.333	0	93.3333	0	0	356.667	146.667	83.6667	0	100	286.333	36.6667	0	6.66667	692
Med127	1	68	2	3	0	30	0	256.667	0	23.3333	378.333	120.667	49.3333	0	80	563.333	0	0	26.3333	882.333
Med129	2	65	1	1	0	170	129	202.667	0	8.33333	274	20	31	70.6667	12	386.333	12.3333	0	0	1638.33
Med129	2	66	1	2
Med129	2	66	1	3
Med130	2	70	1	1	6	228.667	78	213.667	0	0	559.667	30	45.3333	0	86	369.667	0	0	7	2447
Med130	2	70	1	2	42.3333	303.333	0	172	26.6667	30	362.667	70	18	103.333	0	292.667	42.6667	0	2.66667	1730.33
Med130	2	71	1	3	24.3333	376.333	41	183	31.6667	20	505.667	150	67.6667	76.6667	73.3333	150	38	0	0	2260
Med131	1	75	2	1	12	128.667	0	394.667	56	0	10.3333	67.6667	223	0	153.333	345.333	43	0	21.6667	1310.33
Med131	1	76	2	2	12	239.667	0	570	8.33333	6.33333	250.333	221	203.667	0	61.6667	178.667	0	0	20.6667	1586
Med131	1	76	2	3	0	151.333	0	124.667	0	0	219	86.6667	108.667	16.6667	123.333	584	0	0	51.3333	1620.67
Med132	1	79	2	1	0	124.667	0	158	0	0	132.333	111	66	20	0	316.333	41	0	99.6667	2758
Med132	1	79	2	2	72.6667	143.667	0	93.6667	69.3333	10.3333	172.333	101.333	85.3333	0	25	129	30.3333	0	83.6667	1800.67
Med132	1	80	2	3	56	160.667	0	98.3333	0	6.33333	274	31.6667	87.6667	0	0	443.667	41	0	53.3333	2257.33
Med134	2	65	2	1	24.3333	128.667	94.6667	295.667	25	0	292	124.333	117.333	46.6667	63.3333	234.333	10	165	14.3333	1421.67
Med134	2	65	2	2	12	124.333	111.333	138.667	0	10	161	121	93.6667	66.6667	124.333	125	33.3333	74.3333	0	1713.33
Med134	2	65	2	3	0	95.6667	46.6667	154	0	28.3333	112.667	201	130.333	50	6.66667	429.667	19.6667	0	16	1917.33
Med135	2	76	2	1	0	166.333	36.6667	543.667	0	0	270.667	226.667	146.667	156.667	100	504.333	74.3333	99	29.3333	3018
Med135	2	76	2	2	18.3333	205	46.6667	548.667	0	4	274.333	96.6667	70.6667	34	58	574.333	40	99	5	3532
Med135	2	76	2	3	0	296.333	161.667	698.333	78.6667	0	295	113.333	66	0	139.667	270.667	40	181.667	48	2640.33
Med136	1	79	1	1	0	115.333	42	191	25.3333	0	100.667	67.3333	39.3333	51	60	379.333	0	204.667	2.33333	1659.67
Med136	1	80	1	2	42.3333	126	0	356.333	26.6667	23.3333	189.333	69.6667	43.6667	113.333	0	205	0	105.667	5.33333	1583.33
Med136	1	80	1	3	41	143.667	0	296.333	98.3333	23.3333	294.333	80.6667	41	134	0	134.667	0	99	2.33333	1700
Med137	2	70	2	1	0	18.3333	80	242.333	0	0	196.333	49.3333	89.6667	33.3333	0	358.333	90	33	1.33333	1622.33
Med137	2	70	2	2	0	126.333	94.6667	309.333	0	25	65	73.6667	47.3333	93.3333	77.6667	189.333	0	0	0.666667	1152.67
Med137	2	70	2	3	0	60.3333	31	307.667	39.3333	0	224.667	40	40.6667	0	133	162	0	0	0	1226.67
Med138	1	67	2	1	9	98	0	55.3333	0	64	146.667	8	79	101.667	83.3333	337.333	61.6667	0	4.66667	1455.33
Med138	1	67	2	2	0	79.3333	46.6667	0	0	33.6667	172.667	31.3333	88.6667	158.333	183.333	243.333	0	0	0	1381.67
Med138	1	67	2	3	6	55	26.6667	73.3333	0	38	153	24	101.667	113	46.6667	211	43.3333	0	0	1728
Med139	2	65	2	1	9	86.6667	0	101.667	0	16.6667	157.333	15	71.3333	91.6667	83.3333	287	41.6667	231	4.66667	1553
Med139	2	65	2	2	0	162.333	46.6667	75	0	0	179.333	70	71	158.333	150	313.333	0	132	0	1215.33
Med139	2	65	2	3	6	73.3333	26.6667	209	0	38	155.667	20.6667	80.3333	71.3333	46.6667	181.333	43.3333	72.6667	0	998.333
Med140	2	75	2	1	0	159.333	50	241.333	0	0	260.667	37	96.3333	50	123.333	117.667	32.6667	0	0	577
Med140	2	75	2	2	0	178.333	35	285.667	40	0	315.667	22.6667	77.6667	50	73.3333	91	12.3333	0	5.66667	961.333
Med140	2	75	2	3
Med141	1	74	1	1	0	304	61.6667	301.667	0	12.3333	155.333	84.3333	62.6667	0	255.333	292	0	250	19	995
Med141	1	75	1	2	24.3333	410.333	31.3333	478.333	37.3333	28.3333	314.667	120	47	108.333	46	55	0	396.667	5.66667	1331.33
Med141	1	75	1	3	18.3333	493.667	72.3333	367	37.3333	31.6667	381.333	145	86	76.6667	50	29.6667	0	247.667	5.66667	1266.33
Med142	2	69	1	1	0	352.667	63.3333	313.333	0	36.6667	92.6667	59.3333	64.3333	0	242.333	280	0	134.333	2.66667	1120.67
Med142	2	69	1	2	17.3333	421.667	31.3333	436.333	45	10	179.333	87.6667	55.3333	108.333	46	20	0	396	4.33333	1324.67
Med142	2	70	1	3	16.6667	481.333	40	378.333	35.6667	25	150	130.667	57.3333	103.333	50	31.6667	0	297	7	1193.33
Med143	2	79	2	1	0	167.333	237	167	46	0	40.3333	162.667	80.6667	130	63.3333	377	26.6667	0	14.3333	1323
Med143	2	79	2	2	1.66667	54.3333	96.6667	185	0	0	81	56.6667	90.6667	33.3333	16.6667	554.333	31.3333	0	31.6667	1561
Med143	2	79	2	3	0	94.6667	121.667	254.667	14.6667	0	50.3333	31.6667	63.6667	56.6667	132.667	206	19	0	20.3333	1200
Med145	2	71	2	1	0	167.667	0	431	0	9.33333	773	81	36.6667	11	280	922.667	76.6667	178.333	86.3333	1834.67
Med145	2	71	2	2	0	78	0	387	0	0	347.667	61.3333	141	26.6667	0	988.333	0	198	19.6667	1342
Med145	2	71	2	3	0	142	0	258.333	0	0	587.333	74	46.6667	0	82	409	0	99	16	1730.67
Med146	1	81	1	1	0	152.333	0	192.333	0	0	167	90.6667	18.6667	39.3333	121.667	545.333	0	181.667	5	940.667
Med146	1	81	1	2	18.3333	106.333	0	263.667	0	24.6667	301.667	66.6667	101.333	83.3333	25	192	0	115.667	0	1188.67
Med146	1	81	1	3	12	230	0	207.667	71.6667	40	261	104	20.6667	100	74.3333	136.667	0	214.667	0	1374.67
Med147	1	74	2	1	0	148.667	122.667	50.6667	0	25	331.333	33.3333	20	62.6667	95	730.667	0	200	19.3333	3108.67
Med147	1	74	2	2	0.333333	158	46.6667	164	50	21	325.667	46.6667	77	55.3333	66.3333	257.333	24.6667	0	16.6667	3034.33
Med147	1	74	2	3	0	112	13.3333	128.333	0	26.6667	396.333	0	36.6667	0	80.6667	168.667	49.6667	0	16.3333	3240.67
Med148	2	67	1	1	3.66667	168	49.6667	267.667	26.6667	48.3333	282.333	27	77	73.3333	46.3333	462.667	0	0	4.66667	2066.67
Med148	2	67	1	2	57	432	29.3333	284.667	83.3333	23.3333	227.333	26.6667	70.3333	85.3333	83	26.3333	0	99	0	2201.33
Med148	2	67	1	3	65.3333	308	9.66667	256	41.6667	23.3333	311.333	44	51.6667	77	71.6667	52.6667	0	49.6667	0	1740.33
Med149	1	75	1	1	0	107.333	40.6667	173	0	0	185.667	198.333	63.3333	0	40	293	0	132	11.3333	1423.67
Med149	1	75	1	2	21.3333	161.667	0	520.333	75	100	297	197.667	78.6667	176.333	100	142	0	214.667	0	1034.33
Med149	1	75	1	3	6	161.333	71.3333	331	66.6667	140	169	55.6667	94.6667	53	113.333	40.6667	19.6667	247.667	9.66667	1809
Med150	2	71	1	1	0	83	57	124	0	12.6667	350	28	58	0	135	261.333	0	0	12	1388.67
Med150	2	71	1	2	13	126.667	0	270.333	108.333	27	447.667	39.6667	33	101.667	16.6667	326	0	0	14	1419
Med150	2	71	1	3	18.3333	73.3333	0	472.333	25	235.667	496	42.6667	55.3333	26.6667	33.3333	103	0	0	10	1480
Med152	2	72	1	1	0	31.3333	0	224.333	0	51.3333	565	31.6667	145	0	19.6667	119	36.6667	0	14.6667	2566
Med152	2	72	1	2
Med152	2	72	1	3
Med154	1	69	2	1	12	72.3333	166.333	849.667	0	58	213.667	73.3333	125	33.3333	0	394	200.667	82.6667	0	1752
Med154	1	69	2	2	0	400	0	870.333	0	35.6667	169.333	51.6667	79.3333	108	130	164.333	0	170.667	0	1308.67
Med154	1	70	2	3	0	346.667	63.6667	640.333	0	6.66667	20.6667	53.3333	67	63.3333	58.3333	240	0	135.333	13	1962
Med155	2	77	1	1	0	73.3333	47.3333	70.6667	0	0	188.667	58.6667	165.667	26.6667	0	574.333	0	0	4.66667	1735.33
Med155	2	77	1	2	42.3333	450.333	0	194.333	66.6667	10	387.333	68.3333	0	63.3333	10	113.667	0	99	0	1532.33
Med155	2	78	1	3	6	90	0	133.333	111.667	15.3333	444	27	47.6667	31.6667	0	358	0	99	0	1450
Med156	2	67	2	1	0	229.333	98	147.667	57.6667	0	322.667	25.3333	117.667	76.6667	145	204.667	0	0	21.3333	1522.67
Med156	2	67	2	2	6	211.333	41.6667	194.333	0	8.33333	84.6667	63.3333	120.333	31.6667	55	283.333	33.3333	0	1.33333	1297.67
Med156	2	67	2	3	3	104	35.6667	253.667	0	2	83.3333	13.3333	90	41.6667	28.6667	114.333	27.6667	0	4.33333	1676
Med157	1	65	1	1	6	164.667	37.6667	90.6667	0	0	334.667	48	141.333	0	55.6667	468	0	0	34.3333	1175.33
Med157	1	66	1	2	18.3333	387.333	16.6667	411.667	0	40	463	30	120	41.6667	83.3333	76.3333	42.6667	0	27.3333	1574.33
Med157	1	66	1	3	54.6667	342.667	53.3333	308.333	25	40	276.333	30	100	79	0	255.333	16.6667	10	15	1050
Med159	1	67	2	1	1.66667	311.667	22	309.667	36.6667	0	829	183.333	106	0	40.6667	217	0	0	15	4085
Med159	1	67	2	2	0	92.6667	0	247.667	0	0	895.667	87.3333	44.3333	0	6.66667	360.333	0	0	0	3562
Med159	1	67	2	3	1.66667	111.667	81	447.333	110	17	979	63.3333	95	2.33333	126.333	83	36.6667	0	0	3485
Med160	2	64	2	1	1.66667	118.333	20.3333	286.667	0	3.33333	442.333	73.3333	75.6667	70	71.6667	159	33.3333	66	0	1800.67
Med160	2	65	2	2	6	221.667	110.667	246.667	0	2.66667	322	96.6667	69.3333	96.6667	20	222.667	0	0	2.66667	1652.67
Med160	2	65	2	3	0	156.333	26.6667	261.667	33.3333	1.66667	270.667	31.6667	37.6667	55	34	407	0	0	0.666667	1902.67
Med162	1	65	2	1	0	186.667	0	160	0	16.6667	233.333	200	30	116.667	30	309.667	0	0	0	2525
Med162	1	65	2	2	0	116.667	33.3333	416	0	0	169.667	91	106.667	0	216.667	254	0	0	8.33333	2070
Med162	1	65	2	3	0	121.333	0	137.333	0	15	204.333	303.333	51.3333	31.6667	20	238	0	121.333	0	1725
Med163	1	70	2	1
Med163	1	71	2	2
Med163	1	71	2	3
Med164	2	70	2	1
Med164	2	70	2	2
Med164	2	70	2	3
Med166	1	66	2	1	4.66667	299	0	379.667	0	23.3333	130	145	111.333	162	0	106.333	32.6667	123.667	5.33333	2142
Med166	1	66	2	2	9	295.667	0	326	0	0	62	103.333	151	0	136.667	350.333	32.6667	92.3333	2.66667	3988
Med166	1	66	2	3	6	212.667	20	405.667	0	10	122.333	63.3333	74	63.3333	43.3333	378	32.6667	66	5.33333	3502.67
Med167	2	74	2	1	0	149.333	94.6667	126	0	34	149	66.6667	36	0	76.6667	277.667	111.667	0	0	1127.67
Med167	2	74	2	2	0	123.667	0	132	0	17.6667	312.667	20	11	0	139.667	113.667	59	0	2.33333	1091
Med167	2	74	2	3	0	278.333	81.3333	173.333	0	104.667	55.6667	0	90.6667	42	125.333	164	28.6667	0	0	995.667
Med168	1	72	1	1	0	103.667	82.6667	0	0	0	969.333	61.6667	80.3333	195.667	0	224.333	0	478.667	0	1267.67
Med168	1	73	1	2	19.6667	92.6667	0	177	11.6667	53.3333	360.667	46.6667	78	105	33.3333	476.333	0	486.667	0	820
Med168	1	73	1	3	48.6667	183	0	177.667	28.3333	21.6667	435.333	30	60.6667	126.667	58	119.667	0	247.667	0	1950.67
Med169	2	71	1	1	0.333333	22	0	410.333	0	33.3333	388.667	177.667	85.3333	0	0	628.667	38	0	10.3333	1736.67
Med169	2	71	1	2	48.6667	306.667	61.6667	626.667	83.3333	43.3333	431.333	110.667	110	31.6667	106	31.6667	23.3333	0	21	1910.33
Med169	2	71	1	3	48.6667	288	53.3333	1097.33	95	156.667	419	65.6667	139.667	63.3333	41.6667	51.3333	32.6667	0	14.3333	1900.67
Med170	2	71	2	1	0	161	36.6667	292.667	0	0	668.667	30	229.333	31.6667	106.667	225.667	0	0	0	1616.67
Med170	2	72	2	2	0	247	143	251.667	0	0	705.333	63.3333	218.667	30	233.333	148.333	0	0	0	1983.33
Med170	2	72	2	3	6	196	163.333	298.333	0	0	662	90	159.333	0	151.333	99.3333	133.333	0	0	1986.67
Med171	1	79	2	1	6	46.6667	0	247	0	13.3333	213.333	0	100	33.3333	43.3333	353	0	0	51	1008
Med171	1	80	2	2	33.3333	85	0	172.333	0	0	208.333	33.3333	106.333	9	194.333	244.333	0	0	33	1340
Med171	1	80	2	3	18.3333	106.667	0	348.667	0	5.66667	145.667	66.6667	120	88.3333	40	234.667	21.3333	0	26.3333	1523.33
Med172	2	67	1	1	0	55	0	189.667	0	20	161	39.6667	74.6667	0	84.3333	444.333	16.6667	0	15.6667	1877.67
Med172	2	67	1	2	21.3333	46.3333	0	168.333	0	33.3333	158	25.6667	72.3333	16	0	457	21.6667	165	21.6667	2906.67
Med172	2	67	1	3	18.3333	162.667	0	275	0	233.667	203.667	33.3333	47.3333	63.3333	0	147.667	16.6667	0	0	2169.67

## Sheet: 2. food intakes g per MJ
TABLE S1.2 MEDLEY RAW DATA, FOOD INTAKES IN GRAMS/MJ
Study ID	Gender (1=Male, 2=Female)	Age (y)	Diet (1=Med, 2=Hab)	Visit	Olive oil	Vegetables	Potato	Fruit (fresh, canned or dried, but not juice)	Legumes	Nuts	Total dairy	Cereals (rice, pasta, oats, porridge, breakfast cereal, other grains)	Bread (includes all types, rolls, wraps, crumpets, sandwich slice, white, wholemeal, multigrain, homemade etc.)	Fish and seafood	Meat (white and red)	Miscellaneous total	Egg and egg dishes	Red wine (any)	Sugar products (>50% sugar content, white, raw or brown sugar, jams/marmelades, honey, lollies)	Total beverages
Med001	2	68	2	1	2.86265	23.6463	0	33.4891	1.17643	2.74501	23.9992	13.4898	7.01938	4.31359	0	61.3313	4.11751	0	0	269.325
Med001	2	68	2	2	1.04752	44.5194	9.42765	27.2936	0	2.03684	37.7688	27.0026	0	12.5702	0	34.2189	13.8505	0	0.814735	445.194
Med001	2	68	2	3	1.94042	68.338	11.7484	35.8448	0	6.63271	16.0878	6.63271	1.44649	5.9271	10.3371	2.39906	1.44649	0	0	270.953
Med002	2	66	1	1	0.567568	20.0676	4.05405	27.446	0	1.62162	47.4324	6.97297	6.85135	9.93243	1.01351	20.1487	6.48649	30.1216	0.283784	213
Med002	2	66	1	2	5.79651	23.4478	4.89898	21.2788	0	1.42108	33.4328	6.35746	11.8548	0	6.84362	17.5391	4.52502	23.1486	3.06654	279.092
Med002	2	67	1	3	6.3258	19.8208	3.51433	32.7536	3.47919	2.63575	21.6834	1.68688	16.3416	11.5622	9.59413	4.88492	3.44405	6.95838	0.492006	262.942
Med003	2	72	2	1	0.257286	11.4349	6.11769	16.0661	3.48765	6.3178	33.3614	3.00167	4.08799	3.3733	10.5487	24.6709	0	4.25951	0	171.896
Med003	2	72	2	2	0	4.54061	4.69453	39.8265	0	2.30878	33.9776	7.81139	10.1971	2.77054	11.0052	48.6769	0	33.3235	0.615676	264.548
Med003	2	72	2	3	0	44.2284	2.58918	23.8545	0	1.18848	40.2809	3.01364	10.6963	4.24457	25.6372	8.65891	2.07984	6.3244	0.594239	319.319
Med004	2	78	1	1	0	9.16006	8.29283	53.3885	0	0	97.7253	7.80502	10.5151	0	8.07603	25.7999	6.93779	0	1.13823	176.86
Med004	2	78	1	2	2.2944	22.8166	11.5995	39.0049	6.37334	1.27467	57.87	8.79521	6.88321	9.56002	5.09867	93.1146	0	0	1.01973	254.934
Med004	2	79	1	3	5.55449	32.2059	0	48.7674	6.11504	5.2997	49.0222	6.87941	4.48436	16.8163	5.09586	3.77094	6.01312	0	0	165.768
Med005	1	80	1	1	0	5.43803	12.5075	39.3578	0	0	86.3628	5.37006	6.66159	0	5.06417	23.9953	14.2069	0	2.88896	111.242
Med005	1	80	1	2	1.39779	11.1046	7.06659	39.5263	4.85342	4.27101	50.8639	5.82411	14.6768	5.82411	3.10619	69.4622	0	0	4.1157	126.189
Med005	1	81	1	3	4.17041	13.8904	0	65.216	3.94055	2.29865	44.2983	9.85136	11.5261	8.20947	6.56758	6.53474	3.28379	0	2.59419	131.352
Med006	2	82	1	1	0	17.848	0	41.6163	19.2845	4.09198	6.878	4.3967	14.1913	4.87554	13.3642	28.1214	1.74127	0	2.13305	223.753
Med006	2	82	1	2	0.821516	22.643	4.67237	15.044	9.80685	8.16381	21.154	0	16.3276	9.08802	11.5526	25.2103	4.3643	8.36919	1.69438	280.394
Med006	2	83	1	3	3.65963	44.1847	4.95127	25.6712	9.25671	2.69091	21.6887	5.32799	11.1403	5.11272	7.21163	33.0443	4.89745	8.77235	7.69599	223.345
Med007	1	81	2	1	0	8.46521	0	39.3834	0	0	43.5757	14.2699	2.66049	0	15.5195	44.0997	0	47.8889	0	191.596
Med007	1	81	2	2	1.35241	4.32021	1.87835	15.7782	7.51341	0	41.6619	18.6333	6.19857	6.57424	22.5402	23.4794	0	55.7871	1.01431	302.039
Med007	1	81	2	3	0	12.029	7.40013	16.0184	12.2117	0	21.4695	13.643	5.48157	0	21.8958	16.8406	0	30.1487	0	259.218
Med008	1	75	1	1	1.38361	15.1044	3.84337	30.2858	0	0.576506	4.22771	10.9536	13.8361	0	23.2524	46.5048	1.57578	39.0102	0.807108	161.96
Med008	1	75	1	2	1.28419	25.1844	6.2426	31.8194	0	2.14032	33.5317	13.9121	2.6754	9.27471	7.84783	35.0299	2.28301	21.1892	1.03449	182.462
Med008	1	75	1	3	1.48685	38.245	9.08628	39.897	2.47808	4.13013	41.8795	14.662	2.23027	21.0637	9.4993	13.0512	2.06506	26.598	0.289109	272.465
Med009	2	72	1	1	1.39282	9.40155	8.27955	28.3207	0	0	43.99	23.2524	9.28548	12.7675	7.54445	28.785	0	14.3538	0	158.743
Med009	2	72	1	2	1.59575	26.3743	4.87591	40.8247	0	0	45.346	10.1951	7.22522	9.75183	9.53019	37.5002	1.81739	26.3299	0.930856	151.597
Med009	2	73	1	3	1.6138	33.3967	11.8345	35.7726	2.68967	4.48278	45.6347	15.9139	0	22.8622	8.96555	15.8242	1.16552	31.0656	0	294.384
Med010	1	82	2	1	4.34352	30.6849	22.1846	41.1467	0	2.66216	0.93409	14.0114	8.96727	9.43431	18.5884	3.54954	2.33523	27.0419	1.35443	119.423
Med010	1	82	2	2	0	44.2923	24.5311	36.2201	4.45544	0	0	7.07629	14.4671	17.8218	33.0227	0	0	32.7082	1.10076	106.354
Med010	1	83	2	3	4.85739	43.9995	0	60.4109	0	0	0	20.9858	14.0534	5.89489	15.704	4.48012	0	24.5228	1.36762	166
Med011	2	76	2	1	3.94367	17.993	0	23.1691	0	1.2324	0.821599	6.16199	20.0059	7.10683	15.7747	13.6385	2.054	8.75003	3.28639	128.087
Med011	2	76	2	2	6.54033	27.0546	4.46657	26.0975	2.71185	7.62507	2.55233	0	11.5493	11.645	11.4217	7.30603	0	0	0.255233	158.34
Med011	2	76	2	3	6.22138	31.857	0	54.4481	0	4.89768	4.41233	0	12.4428	9.26589	14.5607	9.44238	0	0	0.176493	219.955
Med012	2	71	1	1	1.95487	60.7917	5.81693	105.42	0	2.67007	25.0319	5.72157	8.7254	18.5951	0	18.9289	0	0	0	232.677
Med012	2	71	1	2	7.53707	34.5575	0	45.3731	0	2.26112	8.743	6.78336	13.8305	10.7026	0	51.1013	0	13.9813	0.263797	164.308
Med012	2	71	1	3	7.75086	43.9925	0	89.6034	0.638807	2.04418	25.7652	3.19404	6.55842	6.68618	2.12936	13.415	1.70349	12.6484	0	238.446
Med013	2	68	1	1	0.711411	5.49367	5.25654	28.8121	0	0.750934	39.3647	5.8889	10.434	4.6637	0	50.3916	0	0	0.27666	196.745
Med013	2	68	1	2	5.21554	32.0588	0	40.4802	10.0483	5.64618	38.949	11.9144	10.2875	7.17734	4.7849	8.51711	0	5.69403	0.334943	232.067
Med013	2	68	1	3	4.91498	28.9067	0	63.3116	6.24785	2.91566	45.6093	6.37281	6.2895	3.33219	7.91394	12.7873	12.6207	6.2062	0	236.502
Med014	1	76	2	1	0	37.3869	14.0604	13.5533	0	5.53196	18.7165	5.53196	4.70217	3.04258	21.6669	39.9684	1.70569	47.9437	0.691496	92.8448
Med014	1	77	2	2	0	4.34125	9.23087	7.81426	0	0.502671	18.279	4.79823	8.22553	2.19348	12.7496	54.8369	2.92463	67.8606	0.913948	196.179
Med014	1	77	2	3	0	25.7992	0	16.6544	0	0	19.6825	4.84492	6.60121	0	21.8022	21.4994	17.3812	44.9972	0.847862	152.676
Med015	2	68	1	1	0	21.5469	11.6641	28.327	0	3.44751	29.5911	5.4011	4.59668	0	15.169	40.0486	2.12596	0	5.57347	175.938
Med015	2	68	1	2	1.01672	36.0934	13.8386	50.0451	4.12335	4.23632	52.9258	5.08358	7.11702	5.366	0	12.483	7.22999	0	3.2196	237.234
Med015	2	68	1	3	3.62685	18.6922	3.6667	33.7576	0	7.17399	49.5005	25.3082	5.8189	0	5.69933	9.72474	2.94931	5.93847	2.75003	183.335
Med016	1	74	2	1	0.317312	27.9235	5.3238	26.4074	0	1.26925	22.4587	2.75004	7.33344	9.55463	5.28854	40.1576	2.67953	0	2.39747	240.205
Med016	1	75	2	2	0	29.2821	7.43202	24.9418	1.18912	0.92157	34.5143	9.51298	4.90513	4.01329	15.6072	17.7477	1.21885	33.1171	0.416193	201.11
Med016	1	75	2	3	0	19.2607	6.62269	20.2729	0	0.5784	21.9503	10.4112	5.87076	0.780841	19.6656	24.6109	1.446	17.1785	0.20244	193.388
Med017	1	76	1	1	0	2.08753	4.17506	44.1304	5.84509	0	17.744	18.7878	16.6585	9.76965	12.5252	11.8989	1.79528	0	1.16902	132.224
Med017	1	76	1	2
Med017	1	77	1	3	8.3164	7.85861	0	42.2687	9.53715	4.31079	44.672	5.72229	9.38456	11.2538	0	0	0	0	0	150.42
Med018	2	66	2	1	0	8.33818	1.3897	36.1669	0	7.33065	41.6214	6.32312	10.0058	11.7082	0	15.113	0	5.17662	5.03765	181.911
Med018	2	66	2	2	0.773806	13.3267	0	42.0435	0	4.59985	46.8583	35.939	11.2632	0	12.9398	24.5468	1.76256	0	0.171957	135.287
Med018	2	67	2	3	0.756735	20.9363	0	62.3045	6.30613	3.15306	53.1396	12.8225	14.2939	6.72653	0	12.4861	1.55551	0	1.51347	200.745
Med019	1	74	1	1	1.80437	23.4815	1.48304	9.14544	0	2.76835	52.92	1.48304	10.3319	9.14544	2.96609	15.7203	2.47174	0	3.04024	161.38
Med019	1	74	1	2	4.22596	27.11	0	27.1631	0	2.28574	55.7083	4.22596	11.8805	0	0	29.3691	3.6944	0	1.86049	201.438
Med019	1	74	1	3	2.92125	27.6033	0	12.3287	3.71345	4.35712	70.1348	5.57018	8.9618	5.07506	0	19.9289	1.23782	0	3.16881	144.156
Med020	2	65	2	1	0	13.2069	0	49.4739	1.15922	1.49043	10.9712	18.6304	6.25152	1.65603	13.4553	34.5283	3.60187	30.7608	2.69105	207.708
Med020	2	65	2	2	0.911678	4.35579	7.14148	27.249	6.43239	1.92465	27.1984	11.4973	6.83758	13.9284	2.83633	27.8568	0	40.1138	1.46881	204.621
Med020	2	65	2	3	0	20.3147	0	57.7573	7.46862	0	37.7414	6.87113	10.4561	4.48117	7.46862	37.6419	1.84226	0	0.248954	287.542
Med021	1	65	1	1	1.39289	9.14935	0	27.6392	8.76699	13.1095	23.2967	5.68079	10.3237	7.64721	4.09672	11.1431	4.09672	2.15761	2.64921	62.0244
Med021	1	65	1	2	2.84616	19.1619	0	41.6995	6.78444	3.54115	51.4956	8.60466	8.83633	6.61897	7.61182	23.1664	0	0	1.42308	158.855
Med021	1	65	1	3	5.59018	17.3541	10.4432	57.6218	7.67881	3.47082	35.5683	11.3646	11.8254	11.3646	6.75736	0.614305	3.53225	0	1.32076	90.61
Med022	1	71	1	1	0.292513	15.0482	3.25015	28.0488	0	0	38.3843	4.22519	5.23274	13.3256	1.62507	23.4011	5.20024	19.3059	0.942543	131.469
Med022	1	71	1	2	5.14928	21.5605	6.37847	19.5008	0	1.2624	30.9621	4.91673	14.6505	0	8.07275	19.4012	4.01976	28.7695	3.55467	157.601
Med022	1	71	1	3	2.23298	11.7232	5.23355	32.8667	0	2.44233	32.3434	4.18684	17.3405	10.6765	16.7474	6.73384	3.41926	10.3624	0.94204	159.414
Med023	1	69	2	1	0	23.2076	3.10619	27.0238	0	1.90809	13.756	7.98734	9.98417	7.98734	9.22981	4.43741	0	115.728	0	174.834
Med023	1	69	2	2	0	14.5944	1.06529	22.4243	0	0	23.2499	4.07473	5.32644	15.3401	0	4.92696	0	49.4294	0	124.852
Med023	1	69	2	3	0	8.2739	1.60881	20.6273	0.574577	0	21.3743	10.0551	17.0649	9.65289	18.4439	14.6517	0	24.4195	0	146.517
Med024	2	76	2	1	0	18.1686	18.996	9.03258	0	0	44.7492	3.61993	9.99789	0	15.514	22.0298	0	0	0	249.603
Med024	2	76	2	2
Med024	2	76	2	3
Med025	1	68	2	1	0.420452	12.1464	0	44.5679	10.2777	0	52.4164	4.90528	9.53025	12.9406	0	27.89	0	13.8749	0	163.135
Med025	1	68	2	2	0	10.0357	1.17341	17.3541	0	10.0666	51.8461	5.55825	7.84331	0	0	25.6915	0	0	0	148.992
Med025	1	69	2	3	0	11.4444	0	30.6807	17.4506	6.08743	1.01457	7.71075	15.7056	3.85537	17.0448	3.49013	11.9314	12.0531	0	191.389
Med027	1	67	2	1	0	1.43037	0	48.7962	0	1.38951	48.3058	7.76489	15.3663	0	0	71.2735	0	28.3214	0	195.307
Med027	1	67	2	2	0	11.2555	22.3535	37.0328	1.73161	0.393547	51.7121	7.83159	15.1516	0.787095	0	24.0851	0	33.1367	0.865804	266.668
Med027	1	67	2	3	0	15.2059	0	29.1072	0	0.989735	79.1788	18.0402	10.5272	0	10.4822	13.4064	0	6.7032	0.314916	220.981
Med028	1	71	1	1	0	16.811	17.0512	18.8824	6.00393	9.90649	3.90256	0.90059	9.39616	10.2667	12.0079	17.7416	0	41.6073	0.630413	102.937
Med028	1	72	1	2	4.75815	21.2666	0	44.5931	14.4485	4.32295	39.0226	0.870393	11.8373	3.62664	0	9.60334	3.19144	25.8507	2.29204	118.17
Med028	1	72	1	3	3.15005	19.0737	8.20747	24.738	22.4838	4.01704	39.5057	0.866986	10.5483	3.61244	13.0048	5.75101	5.05742	22.8884	2.08077	129.961
Med029	2	67	1	1	0	26.0764	0	7.4785	0	6.59289	10.9964	0	7.0111	13.1858	6.15008	17.5154	4.82167	46.2732	1.45142	126.347
Med029	2	67	1	2	3.32409	24.814	0	37.9354	11.401	4.34464	31.7538	0	7.96032	8.77676	5.54015	10.2347	3.32409	31.7538	1.86616	118.938
Med029	2	67	1	3	3.91	20.3392	10.1875	30.6702	17.1825	4.98615	40.5349	0	10.1875	10.2234	7.53303	3.6589	4.44807	28.4103	2.04468	173.869
Med030	2	76	2	1	1.77032	63.4623	0	53.4561	16.0869	1.92426	18.4729	2.8864	12.5462	11.892	19.9354	27.4785	4.92612	0	0.731221	108.298
Med030	2	77	2	2	0.874324	9.22898	0	47.845	0	1.06862	43.6191	1.74865	17.2436	8.54895	0	70.626	5.78026	0	0.340015	227.761
Med030	2	77	2	3	0.848381	59.481	0	47.6979	0	0	37.2345	6.26859	15.7422	4.00624	35.9619	18.3816	0	0	1.41397	186.455
Med031	2	65	1	1	0	25.1324	4.57624	24.136	5.90482	0.442862	27.9741	4.87148	10.4073	0	17.8252	16.7918	3.13694	0	5.24053	303.471
Med031	2	65	1	2	4.1793	38.6585	3.26508	48.6714	8.70687	2.61206	36.3947	7.2267	11.3189	6.53015	7.83618	5.61593	2.56853	0	0.914221	358.244
Med031	2	65	1	3	3.75606	32.9782	1.31462	31.3255	2.81704	3.9063	24.79	14.9491	15.0618	11.6438	6.19749	6.94871	1.87803	0	1.87803	303.677
Med032	2	74	1	1	1.0784	19.3513	0	50.4452	6.59023	7.42899	22.7363	8.98668	0.808801	0	13.48	20.7892	0	0	1.46782	217.867
Med032	2	74	1	2
Med032	2	74	1	3
Med033	1	65	2	1	0	5.11877	1.20916	9.47174	0	0	84.5201	3.62747	8.14166	4.03053	25.0699	12.2528	6.48915	0	0.846411	110.92
Med033	1	66	2	2	0	7.19169	0	14.6266	0	0	54.9973	5.17662	4.16909	0	28.4888	43.2543	2.84888	0	0.13897	200.186
Med033	1	66	2	3	0	4.47661	9.64786	1.54366	5.32562	0	47.699	2.31549	6.94646	28.2489	11.5774	26.0106	0	0	1.23493	73.9412
Med034	2	69	1	1	0.369467	53.778	6.77357	23.687	0	2.83258	14.7787	6.89672	1.55997	3.89993	28.0795	21.7165	2.01154	30.5016	0	268.89
Med034	2	69	1	2	2.19156	34.4673	9.72256	22.075	0	2.15171	33.4312	3.94481	8.56701	13.508	14.3049	9.40378	1.1954	23.6688	0	313.313
Med034	2	69	1	3	6.26252	34.8324	0	33.5068	5.71398	1.9199	22.1245	1.50849	9.82804	25.5529	11.428	1.32564	2.60557	0	0	366.38
Med035	1	68	1	1	0	13.6045	2.22296	10.0478	1.46716	8.6251	5.69079	4.22363	13.0043	0	4.49039	24.2303	0	33.011	4.53485	128.109
Med035	1	68	1	2	2.36468	24.2773	0	36.2584	10.4361	4.72935	32.8217	5.67522	9.52176	8.70201	7.09403	5.51758	0	36.889	1.29269	181.67
Med035	1	68	1	3	4.59716	24.6575	0	27.0913	0.614593	4.91674	29.6725	2.77796	11.8494	8.85014	3.68756	7.3997	0	29.353	4.74466	170.66
Med036	1	70	2	1	0	4.97245	3.82496	27.8457	0	0	23.3323	6.04344	0	0	11.4749	67.3958	0	15.1468	0	332.695
Med036	1	70	2	2	0	19.9366	2.78555	11.8187	0	0.99484	19.0611	6.56594	6.44656	0	10.9034	65.9778	0	0	0.278555	234.902
Med036	1	70	2	3	0	14.5422	9.35617	31.2763	10.6928	5.34638	13.5798	9.35617	12.0294	0	14.756	10.7462	0	15.8788	0	272.665
Med037	2	66	2	1	0	4.94302	0	60.1959	4.189	1.6756	82.4395	0	5.40381	3.97955	0	51.1058	0	0	0	345.173
Med037	2	66	2	2	0.203854	21.9347	0	66.3749	8.15416	1.01927	62.3793	9.98885	0	9.37729	0	18.0207	2.03854	0	0	309.369
Med037	2	67	2	3	0.723027	9.27884	0	75.6366	0	1.40588	79.0509	0	3.5348	0	0	45.7515	8.03363	0	0	313.03
Med038	2	65	1	1	0.242097	23.6286	5.18087	33.5062	0	1.16206	58.4906	17.8183	9.34493	0	1.21048	28.6643	6.87555	26.3885	1.7431	310.223
Med038	2	65	1	2	3.9362	32.4737	5.8223	41.2481	3.23917	5.57628	42.8882	17.7539	4.96125	30.8746	0	2.70614	0	6.10931	2.33712	244.905
Med038	2	65	1	3	4.19622	28.0261	3.58026	60.4409	2.88731	3.69575	58.4391	6.15959	6.19808	15.9379	0	3.23378	0	23.8299	1.38591	257.124
Med039	1	66	1	1	0	4.92917	0	54.5109	0	9.96708	11.0182	3.98683	8.95225	0	0	42.7316	2.68205	0	0.724879	344.499
Med039	1	66	1	2	3.50714	22.0273	0	54.1145	0	4.61465	23.1348	9.69077	26.3958	6.76816	3.07644	4.98383	0	0	0	244.638
Med039	1	66	1	3	3.7857	33.5034	3.5207	68.8619	3.7857	2.64999	27.1435	10.4107	17.0356	4.73212	6.20855	4.46712	0	0	0	278.249
Med040	1	76	1	1	0	10.7634	3.16418	27.9848	0	1.81551	44.7654	14.4204	7.70296	9.12944	8.04013	14.3685	1.03744	0	0.129679	130.432
Med040	1	76	1	2	2.89199	3.12335	0	48.8168	3.61499	4.33799	59.6329	9.08086	8.21326	2.74739	6.50698	42.0496	0	0	0.578398	174.618
Med040	1	76	1	3	5.82772	12.303	7.60841	18.8429	2.26633	4.04702	68.249	5.27732	12.1734	4.69455	8.74157	17.4831	0	0	1.58643	113.317
Med043	1	69	1	1	0.915695	23.435	7.59688	21.7393	14.2442	2.47577	7.08816	9.63176	8.03777	0	3.79844	43.8177	4.88371	3.6967	1.28876	201.351
Med043	1	69	1	2	7.68496	29.126	3.5735	37.6563	2.88186	5.30262	10.221	4.38042	7.9155	7.76181	4.30358	34.0828	0	4.1883	0.153699	261.75
Med043	1	69	1	3	4.90691	23.3191	0	35.6989	0	4.41171	12.3348	5.71722	9.13855	7.92308	0	33.583	6.30245	6.70761	0	223.512
Med044	2	67	1	1	1.05692	25.4281	6.65235	32.0805	6.52801	2.02057	32.7022	10.5692	9.20138	2.11383	3.10857	38.7017	4.47635	3.6992	0.124343	139.295
Med044	2	67	1	2	5.94628	31.7593	0	51.8323	5.15574	3.40279	43.3082	11.0333	8.28355	4.19333	4.29645	36.0214	4.12459	10.2084	0	115.179
Med044	2	68	1	3	3.07898	22.776	0	57.3619	0	5.86272	35.2607	12.8642	9.02606	7.4233	0	21.9747	4.21778	12.5268	0	135.096
Med045	1	68	1	1	0	29.0291	0	35.8798	0	0.640711	44.554	4.3864	5.66783	4.3864	10.3499	30.557	0	6.99853	5.32283	226.91
Med045	1	68	1	2
Med045	1	68	1	3
Med046	1	67	1	1	0	13.5003	17.1223	28.8116	0	1.37198	54.4677	3.12812	4.9117	7.43615	4.80194	30.019	10.9759	0	1.04271	106.329
Med046	1	67	1	2	7.5462	23.7018	11.2285	44.992	3.31929	4.66775	24.6354	3.88979	7.57213	7.13129	6.48299	5.7569	0	0	1.47812	166.587
Med046	1	67	1	3	4.84761	23.1092	15.2069	48.6421	8.3007	4.81441	42.8316	3.78512	12.6503	7.80266	4.94722	6.27533	0	6.57416	0	119.829
Med047	2	73	2	1	0	38.7254	14.5638	14.0386	0	5.73002	19.2911	5.73002	4.87052	4.29752	20.0551	43.5959	1.76676	30.7511	1.43251	122.384
Med047	2	73	2	2	0	3.76253	16.4437	7.94313	0	0.510961	9.52246	3.48383	8.36119	2.22965	17.6049	47.3801	2.97287	17.2333	0.929021	163.508
Med047	2	73	2	3	0	25.0732	4.74197	14.8187	0	0	20.2126	3.55648	8.1799	0	21.3389	36.039	17.0118	26.4365	0.829844	202.778
Med048	1	65	2	1	0.305981	5.09968	0	11.5253	0	3.1108	8.56746	19.6338	17.2879	14.4321	8.77145	18.3078	3.77376	50.4868	0.356977	92.0492
Med048	1	66	2	2	0	17.0964	15.2881	7.97282	3.61654	0.904135	2.54802	0.821941	13.562	7.39747	18.4937	25.9733	5.63029	30.5351	1.10962	109.606
Med048	1	66	2	3	0	15.6682	2.04368	38.83	0	1.63495	14.7145	21.7993	5.44982	8.85596	30.6552	5.92668	0	30.3827	0	180.662
Med049	1	66	2	1	0	22.1289	8.33225	24.2604	0	1.35641	64.914	8.2935	8.06097	2.32528	15.9669	17.3233	0	0	0.968866	207.531
Med049	1	66	2	2	0	5.88077	0	35.2048	0.425757	2.07556	45.8487	2.63437	16.4715	6.12026	7.82328	27.4347	0	3.96486	0.558806	85.2312
Med049	1	66	2	3	0	11.8232	5.80182	54.098	2.82251	3.13612	32.2393	3.10476	9.87877	0	16.935	17.2173	0	0	1.129	186.442
Med050	2	70	2	1	0	41.6361	4.33807	68.9376	0	2.12188	50.3594	15.5133	6.50711	2.82918	1.50889	48.4261	0	0	0	188.282
Med050	2	70	2	2	0	16.8961	8.83205	73.7764	0	1.44001	49.4883	10.1281	8.40005	2.40001	10.9441	29.9042	6.14403	0	0	144.961
Med050	2	70	2	3	0.899552	35.1608	2.77688	55.1856	0	7.35286	41.2621	15.6444	5.0062	4.88887	9.77774	34.1439	0	0	0	156.444
Med051	2	70	2	1	0	18.945	0	3.39543	0	0	16.3212	1.7363	9.37602	16.0511	0	49.118	2.73949	2.27648	0	182.504
Med051	2	71	2	2	0.307264	30.4191	11.4917	89.2908	0	0	33.123	13.9498	6.45254	0	19.6649	14.6258	2.51956	0	0	265.967
Med051	2	71	2	3	1.61346	24.9639	19.2271	9.2326	3.80957	0.627458	36.9304	2.68911	6.54349	13.8041	6.76758	38.9472	0	0	0	178.153
Med053	2	66	2	1	0	7.04182	7.04182	13.9428	0	0	25.0689	12.4405	9.85854	11.7364	14.3184	60.1371	10.4219	0	1.22058	280.781
Med053	2	66	2	2	0	23.9327	11.9479	35.4381	3.13449	0.553145	5.6052	0	2.50759	12.5379	13.3861	36.5813	7.74402	0	0.99566	169.188
Med053	2	67	2	3	0	31.8791	7.70027	27.0279	11.5504	0	19.2507	2.8876	0	0	13.1675	24.8334	5.39019	20.2132	0	118.353
Med054	2	66	1	1	0.208357	24.8361	0	31.3786	0	0	16.1685	5.20892	1.20847	12.7931	12.5014	41.6297	2.50028	0	2.37527	252.862
Med054	2	66	1	2	1.22454	15.3333	0	93.0116	0	1.86343	40.8357	0	8.41204	15.9722	0	55.3704	5.37732	0	0	187.088
Med054	2	66	1	3	1.3462	14.2521	0	34.8548	0	6.11641	24.6705	1.99003	3.04357	6.87731	4.38977	60.7837	0	0	0	172.372
Med056	2	77	2	1	0	12.6338	2.27088	18.5189	0	1.53524	32.1121	2.30286	7.80415	1.79112	13.2734	44.8738	0	31.6644	0	234.22
Med056	2	77	2	2	1.62644	33.7939	6.41542	55.1636	0	3.20771	44.2754	7.90633	3.6595	0	21.189	9.80385	1.80716	44.7272	0	289.146
Med056	2	77	2	3	0	14.9804	12.3262	38.8681	0	4.49862	32.1651	2.02438	2.42925	6.74793	21.0535	20.6037	0	13.3609	0	334.292
Med059	2	70	1	1	0	6.46048	4.98581	32.5131	5.2667	0	10.6036	3.01957	2.91424	0	1.75557	10.1823	0	0	1.89601	31.8108
Med059	2	70	1	2	4.06163	47.2536	0	91.1389	17.0885	2.97192	47.105	16.9895	8.51951	6.1915	2.92239	17.4353	0	22.0913	0.49532	198.376
Med059	2	71	1	3	3.619	48.551	0	24.957	0	1.41	26.555	6.815	15.933	13.959	12.455	11.092	0	20.962	1.645	195.567
Med060	2	65	1	1	0	8.71027	8.32142	4.31625	0	0.816588	21.2313	12.4044	2.83861	0	6.57159	55.4502	7.77702	0	1.28321	188.709
Med060	2	66	1	2	2.82104	47.8111	0	22.0187	11.0277	0.476279	15.4607	11.5772	11.4673	10.2583	0	24.9497	0	5.45889	1.72193	150.431
Med060	2	66	1	3	1.02153	40.3727	0	66.6215	0	1.46567	39.3511	4.66351	13.2355	0	17.6769	17.5437	1.77657	6.61774	1.11036	169.308
Med061	1	70	2	1	0	21.0743	12.217	16.4624	0	0	30.6341	12.4002	6.6888	0	26.633	26.4803	3.6651	0	0	57.9696
Med061	1	70	2	2	0	9.05557	0	9.24325	0	3.519	32.1872	7.03801	15.4836	8.21101	4.69201	19.2372	0	0	0	71.0839
Med061	1	70	2	3	0	16.2259	11.3468	6.24072	0	0	18.9491	11.0631	3.40403	0	18.4385	35.6289	7.26193	0	0.453871	138.771
Med062	2	72	1	1	0	9.0261	7.86679	25.8362	0	0	4.76148	0	4.72007	0	0	9.48155	1.24212	0	1.15932	48.1944
Med062	2	72	1	2	4.8021	36.0725	6.12552	44.1264	2.83589	3.02495	27.0355	0	10.3226	6.04989	6.73051	26.317	0	0	4.19711	327.526
Med062	2	72	1	3	5.9495	21.477	21.5097	49.067	7.35515	2.87668	20.3329	0	6.30908	3.59585	0	10.1664	3.82468	0	2.97475	181.1
Med063	2	73	2	1	0.664982	22.2769	9.23586	44.1474	0	1.55163	119.364	5.83707	5.13514	4.35933	8.97726	17.4743	2.17966	0	0.258604	187.673
Med063	2	74	2	2	0.423543	39.1542	0	58.9666	2.87068	1.12945	84.6145	6.25903	6.87081	2.58832	13.1769	8.89441	0	0	0	358.365
Med063	2	74	2	3	0.971042	24.5997	4.17189	59.2336	0	1.79823	75.6694	4.42364	3.52452	6.90519	4.5675	17.9823	2.04998	0	1.65437	214.205
Med064	2	76	1	1	0.266014	13.8327	0	13.8859	0	1.70249	11.545	3.67099	4.57544	5.05426	2.12811	0.266014	0	9.20408	0	63.3113
Med064	2	76	1	2	4.72498	17.0397	6.06434	20.2393	3.72045	10.3057	16.4816	4.39014	4.68777	9.52436	2.08345	21.3926	0	11.0497	0.260432	176.908
Med064	2	76	1	3	2.86804	22.2765	0	17.3261	0	8.83986	17.5226	16.8154	2.63232	0	1.17865	24.9088	6.08968	11.6686	0	150.199
Med065	2	69	2	1	0	33.7316	10.9777	34.4501	0	0	35.2086	12.4947	3.95198	0	23.0333	9.58056	4.91004	0	1.477	380.388
Med065	2	69	2	2	0	18.2649	0	22.5294	0	1.20693	38.9035	5.02889	0	2.77595	12.0693	44.8577	0	0	1.64948	493.475
Med065	2	69	2	3	0	25.1195	2.28359	31.0324	0	0.611676	45.264	7.01389	1.1418	0	9.62371	21.898	0	0	12.886	358.483
Med066	2	66	1	1	0	2.59914	0	11.996	0	0	0	0	2.3992	1.59947	9.33024	11.996	0	0	0.933024	35.1883
Med066	2	66	1	2
Med066	2	66	1	3
Med067	2	74	1	1	1.78161	21.2309	5.29535	50.0831	0	2.37548	64.336	4.45403	2.67242	7.02747	6.23564	6.28513	9.00704	12.2733	0	302.033
Med067	2	74	1	2	1.43927	70.8392	0	51.2741	10.4797	2.51873	61.439	6.20686	2.42877	11.0194	8.99546	1.52923	5.75709	13.3583	0	241.438
Med067	2	74	1	3	1.35513	45.9615	0	36.852	1.54334	6.39923	55.9744	11.9327	4.06539	7.5285	0	8.16843	3.08669	28.0437	0	207.034
Med068	1	78	1	1	0	16.1251	0	14.2194	0	0	23.8456	1.66137	3.5182	0	7.32958	5.52162	0	0	0	96.4573
Med068	1	78	1	2
Med068	1	79	1	3
Med069	2	72	1	1	0	18.8605	0	8.63011	0	0	18.689	1.65744	4.11502	0	8.57296	6.45829	0	0	0.171459	83.3863
Med069	2	72	1	2
Med069	2	72	1	3
Med070	2	70	2	1	1.26745	18.5643	0.633723	32.0962	1.71478	0	12.1526	3.16861	5.25617	9.13306	0	9.9159	2.23667	13.8301	0.260945	218.634
Med070	2	70	2	2	0.965148	32.9491	0	33.6998	0	5.63003	23.5657	4.4236	4.85255	11.3673	0	12.7882	3.48526	0	0	303.217
Med070	2	70	2	3	3.0913	24.2152	0	32.3621	4.02513	0.998232	14.3295	3.47771	2.9947	16.1005	0	25.4066	7.37404	0	0.740624	271.906
Med072	2	65	1	1	0.21329	4.26581	5.20428	1.06645	0	0.383922	16.7646	2.1329	2.6448	4.4791	6.39871	1.96227	0	16.8926	0	167.134
Med072	2	65	1	2	3.96992	27.8291	3.65233	34.4986	1.50857	3.41413	37.6348	7.54285	6.59007	9.9248	2.85834	4.8433	7.93984	21.6361	2.14376	363.923
Med072	2	65	1	3	4.67541	15.6667	5.00351	40.5203	1.76353	2.54277	22.9259	2.05062	15.4207	7.79236	7.34122	21.4495	1.6405	18.2915	1.47645	424.478
Med073	2	75	2	1	1.72371	21.8815	10.2944	31.6014	10.5338	2.29828	29.351	1.43643	11.8266	20.0142	6.79908	19.4875	2.39404	9.48041	0	312.422
Med073	2	75	2	2	1.38232	29.5407	14.7447	49.2516	9.72744	1.07514	22.0659	2.55985	13.004	13.6184	0	30.2575	0	0	0	330.63
Med073	2	75	2	3	0	29.6654	0	25.2048	2.07875	0.606301	27.8898	3.46458	18.2756	2.77166	12.9055	24.9016	3.03151	0	0	314.324
Med074	1	68	2	1	0	21.052	0	4.90964	0	0	51.7	6.69497	18.5227	14.8777	3.71943	26.2591	0	0	4.09137	214.983
Med074	1	68	2	2	0	10.4243	0	3.25761	0	6.38491	98.9661	16.679	8.60009	5.21217	0	27.2988	0	0	2.15002	146.592
Med074	1	69	2	3
Med075	1	82	2	1	0.0701429	1.75357	0	40.3322	0	1.68343	36.6146	6.52329	2.31472	0	0	49.4858	0	0	0	162.451
Med075	1	82	2	2	0.358588	22.0695	7.98674	40.7161	0	4.82464	37.9126	21.8087	4.49865	13.2026	0	16.5277	2.41232	0	0	146.989
Med075	1	82	2	3	0	33.0584	0	23.2805	13.2233	5.40109	59.2567	11.6713	6.98416	6.58063	4.96652	11.7955	0	0	0	173.052
Med076	2	64	2	1	0.949679	60.4827	0	37.2749	5.04517	1.78065	10.031	5.57936	15.4916	20.1213	5.28259	25.1665	5.81678	14.72	0	266.147
Med076	2	65	2	2	0.183422	11.0787	0	16.5814	0	2.75134	26.4862	11.0053	9.31786	9.53796	5.06246	15.9944	12.0325	0	0	113.832
Med076	2	65	2	3	2.86083	35.243	0	52.5298	0.608688	0	8.94772	8.52163	12.9042	14.9129	11.8694	21.4867	6.14775	13.5737	0	261.432
Med077	1	79	1	1	0.0564488	116.059	5.81423	31.442	0.620937	0.762059	5.16507	4.29011	1.63702	0	0	10.189	0	1.66524	0	28.5349
Med077	1	79	1	2	4.97749	25.1314	0	30.0113	2.80594	6.29506	13.3221	7.46623	11.8093	2.80594	2.43995	46.8713	2.56194	7.24664	0	129.366
Med077	1	80	1	3	4.12461	37.096	0	23.7801	1.57855	7.15441	12.9849	6.69612	10.6425	7.71454	2.29145	36.9687	0	7.30717	3.10618	151.286
Med078	1	77	2	1	0.739144	15.9053	6.40591	45.3889	0	5.17401	40.3792	5.7489	6.89868	2.21743	4.38011	14.8103	0	0	0.684392	145.666
Med078	1	78	2	2	1.35531	12.6692	8.54436	51.0894	0	2.6517	23.5117	5.74534	4.12486	0	5.59803	15.1736	2.94633	0	0.0883899	123.893
Med078	1	78	2	3	0	21.1429	9.19257	37.2483	0	3.05193	26.5482	8.89841	12.2445	0	1.47081	18.8632	0	0	1.25019	180.174
Med079	2	79	2	1	0.985217	18.0623	9.08589	61.6673	0	0	10.7644	0	17.369	2.88267	5.47343	18.8651	0	0	1.64203	158.328
Med079	2	80	2	2	0.885769	15.911	7.21738	52.0635	0	0	30.7723	0	8.26718	0	6.23319	20.9304	3.60869	0	1.47628	98.4188
Med079	2	80	2	3	1.84664	26.4173	12.8239	67.659	0	0	37.8562	0	18.9794	0	2.56478	16.6198	0	0	3.5907	145.68
Med080	1	67	1	1	0	28.6711	0	46.2561	0	0.173764	23.3887	4.17035	14.5615	0	17.4112	43.3716	0.834069	0	1.00783	86.2567
Med080	1	68	1	2
Med080	1	68	1	3	2.24507	7.46728	0	40.948	0	0	52.5638	10.5909	4.63655	12.4455	30.4548	17.326	0	0	0	187.073
Med081	2	72	2	1	1.63352	43.0613	7.03319	18.6039	0	1.63352	24.8657	11.3439	3.49391	5.12742	8.25833	41.1555	1.36126	26.953	0	227.83
Med081	2	73	2	2	0	41.6176	7.84822	33.1615	0	1.65807	41.1755	12.325	5.25057	15.5306	13.8173	1.38173	6.52176	27.524	1.16065	204.496
Med081	2	73	2	3	1.83284	17.462	0	19.1948	0	1.66622	34.1908	24.8266	4.46546	2.3327	3.99892	27.4259	2.466	0	0.966406	208.877
Med082	1	69	2	1	0.669844	16.374	14.811	16.1879	0	3.72136	6.0286	0	5.69367	12.6526	16.0018	17.8625	0	29.4731	0.930339	178.96
Med082	1	70	2	2	0	35.205	14.4283	8.7724	0	0	13.274	1.15426	9.58039	1.7314	17.0254	19.8533	2.88566	0	1.21198	303.11
Med082	1	70	2	3	0	6.95802	0	20.5319	0	0	11.4446	7.22417	1.44483	1.9011	17.8703	46.5009	3.72615	7.52835	0.494285	244.633
Med083	2	77	1	1	0.0962522	18.0473	4.81261	23.7743	6.25639	1.2994	86.3864	9.57709	9.9621	6.73765	9.43272	13.8603	10.5396	11.9353	0	250.4
Med083	2	77	1	2	3.55118	46.6648	0	54.6549	0	2.21949	57.1518	1.66462	21.1406	27.1887	0	6.54749	0	0	0.388411	332.923
Med083	2	77	1	3	5.67939	44.7875	2.8397	73.9816	6.22741	2.98916	42.2467	0	12.405	31.137	0	0.448373	0	0	0	249.096
Med084	2	68	1	1	0.252297	16.6516	6.15605	63.6293	0	0	17.6608	8.62856	11.9589	0	10.0919	55.8586	0	0	0	250.834
Med084	2	68	1	2	2.75271	42.3416	0	18.0678	4.95487	1.50148	44.9442	23.7233	3.90384	0	0	42.5919	0	0	3.00295	265.411
Med084	2	68	1	3	1.44447	21.6671	0	40.2847	17.2267	6.15238	42.2642	4.54741	4.81491	16.0497	14.7657	16.2102	0	23.8605	1.55147	340.414
Med085	2	68	1	1	0	25.6545	4.36328	47.5113	0	0.0404008	27.6745	4.80769	9.93859	0	21.1296	44.2388	1.01002	0	1.89884	65.1664
Med085	2	68	1	2
Med085	2	68	1	3	6.73823	15.9827	0.821735	31.3903	0.616301	0	38.2107	5.54671	8.83365	6.12193	0	3.77998	9.69647	0	1.02717	101.073
Med086	1	66	1	1	0	17.0838	16.1636	13.8831	0	0	34.8077	3.6008	8.40187	0	10.0022	48.7308	0	0	3.80085	306.068
Med086	1	66	1	2	1.85371	11.7964	5.66225	15.8408	0	0.943709	33.9735	11.1223	7.07781	0	22.1772	31.1087	0	0	4.28039	121.502
Med086	1	66	1	3
Med087	1	86	1	1	0	34.8508	3.10502	51.6924	0	0.248402	16.2206	6.21005	8.69407	3.99927	0	13.4137	10.0354	0	1.63945	100.131
Med087	1	86	1	2	1.41453	15.851	5.03406	49.4253	0	2.70425	41.4374	4.03557	14.1453	10.3593	0	40.1893	0	0	3.99396	186.51
Med087	1	86	1	3	2.57744	11.6487	4.01679	59.0468	0	2.34313	29.1217	9.40598	14.1927	22.8957	0	6.56075	0	0	1.70714	161.575
Med088	2	67	1	1	1.34328	18.694	4.77611	39.8134	8.58208	2.01492	61.6044	3.09701	9.25372	8.84327	0	15.0373	5.37313	0	2.16418	110.224
Med088	2	67	1	2	3.67437	22.9299	0	34.4182	0	1.62789	39.9995	11.9998	11.3952	11.3487	0	23.1625	4.69762	0	3.11624	157.207
Med088	2	67	1	3	0	31.1115	3.21182	41.1783	8.05351	2.301	52.204	3.068	9.53957	5.32107	0	12.7034	5.65663	0	0.335563	126.507
Med089	2	65	1	1	0	24.0555	4.55634	26.8481	0	8.47578	35.0299	4.40936	6.07512	13.718	4.11541	39.1943	6.27109	9.7006	0.195972	222.918
Med089	2	65	1	2	4.97786	10.1805	9.12073	23.7974	0	7.22593	22.9945	4.81729	6.16613	8.99227	15.0942	4.81729	7.32227	19.0764	0.128461	186.268
Med089	2	65	1	3	3.14694	12.0345	17.2217	42.7085	4.32272	7.7809	23.6885	4.32272	10.5129	12.4149	5.25643	6.81261	5.67141	15.4235	0.484145	235.156
Med090	1	65	1	1	0	6.30472	1.07223	39.8441	0	0	6.86228	14.7968	6.64784	0	0	43.2324	0	0	0.943564	194.117
Med090	1	65	1	2	0.810548	4.54808	0	30.1704	0	1.80122	68.1761	15.7607	7.61015	2.83692	0	77.6325	2.25152	0	0.585396	239.292
Med090	1	65	1	3
Med091	1	68	1	1	0	10.1568	0	43.3522	0	0.867044	33.5051	10.2807	7.02925	6.50283	0	50.9698	8.23692	19.942	0.805113	212.859
Med091	1	68	1	2	2.98842	21.2073	0	30.094	6.29142	1.41557	35.8349	13.3168	12.3993	7.20892	6.02928	14.3392	0	19.4772	1.23207	138.018
Med091	1	69	1	3	3.17583	11.603	7.10185	36.9346	6.25163	4.87627	32.3084	11.8781	10.9278	7.25189	0	12.2282	0.925241	14.8539	0.175046	167.319
Med092	2	68	2	1	0	17.508	11.5236	33.3344	9.89151	0.692406	30.4658	6.23165	14.1449	0	12.859	34.2246	8.11104	0	0.39566	294.915
Med092	2	69	2	2	0	18.423	10.2497	34.5391	2.60361	0	21.1255	19.1151	5.5368	0	2.20813	57.1147	3.16388	0	0	174.673
Med092	2	69	2	3	0	22.3071	0	46.6096	0	0	19.135	3.06979	20.3629	20.4652	4.50235	22.6653	0	0	5.01399	232.639
Med093	1	76	1	1	0	0	0	19.2039	0	0	13.8618	46.4669	19.1118	0	0.322367	43.1051	0	27.3551	0.782891	251.999
Med093	1	76	1	2	4.43436	22.0873	5.1523	31.8007	19.3845	5.44792	28.4643	2.57615	10.8114	4.01204	10.009	7.2639	4.13873	25.0858	1.01357	253.814
Med093	1	76	1	3	3.80173	15.283	0	35.6982	2.28104	4.60009	49.3845	3.53561	19.2748	5.20837	9.84648	7.07122	0.874398	28.2469	1.67276	240.992
Med094	2	74	1	1	0	0	0	17.1981	0	0.364624	18.1097	39.4402	17.1981	0	0	54.0251	0	36.0978	0.425395	278.634
Med094	2	74	1	2	3.56564	16.1186	5.95901	26.3271	12.4065	6.30092	42.7876	2.9795	9.18274	4.64021	11.0877	8.15701	4.78675	36.2913	0.830354	247.885
Med094	2	74	1	3	3.01472	16.2983	0	35.894	2.8263	5.69971	61.3308	4.47498	16.4868	3.90972	8.24338	5.88813	2.49657	34.999	1.93131	197.04
Med097	1	75	1	1	0	24.3281	14.9982	28.3692	0	0.488189	29.2913	11.6623	11.3368	3.71566	22.1312	18.8224	0	13.4523	0.298338	181.362
Med097	1	75	1	2	0.743718	8.1809	0	24.187	3.23356	5.78807	45.2698	10.8648	4.85034	0	12.1582	52.7717	3.65392	31.4949	0	195.986
Med097	1	75	1	3	1.14085	6.90849	0	60.1482	0	1.20423	55.2679	19.0142	8.36624	0	0	54.6975	0	65.9158	0	218.663
Med098	2	70	1	1	0	22.8955	5.17674	40.951	0	0.883834	44.0233	3.11446	7.02858	5.34509	23.148	49.7472	0	0	0	195.159
Med098	2	70	1	2	0	14.6564	0	48.3564	1.01245	0	36.4481	5.78541	0.674964	6.84607	11.4744	95.2664	4.82117	0	0.8196	212.614
Med098	2	70	1	3	2.3896	9.38462	0	73.5563	6.08262	1.43376	26.1553	8.21154	0.65171	2.99786	1.04274	66.822	0	6.5171	0.782052	224.405
Med099	2	67	2	1	0	26.3584	3.83396	29.5215	0	1.43773	48.835	8.38678	10.0641	29.3298	0	40.9275	1.00641	0	1.19811	144.876
Med099	2	67	2	2	0.271459	22.0968	0	29.6434	0	1.62876	58.7438	2.93176	6.62361	7.60086	0	56.9522	5.3206	0	0.597211	182.095
Med099	2	67	2	3	0	23.0856	0	49.5728	0	2.26774	35.0139	7.02999	12.6086	0	8.6174	32.7008	0	0	2.17703	281.29
Med100	1	68	1	1	0	4.62952	1.60252	33.1188	0	0.400631	9.43709	8.90291	18.0284	0	2.1367	58.4921	7.74554	33.0743	0	278.216
Med100	1	68	1	2	2.8697	1.37246	0	25.1411	0	4.86601	31.8162	0	21.8347	0	0	116.722	3.05685	0	4.99078	374.308
Med100	1	68	1	3	3.18176	48.2226	5.54619	26.213	8.02737	11.9973	14.8871	0	10.8005	2.91904	8.46523	5.98404	1.45952	17.3391	1.66386	134.51
Med101	1	67	1	1	0.77287	45.0411	0	66.6815	0	0	12.1512	6.86995	9.2315	8.58744	0	24.7748	0	0	3.47791	82.8688
Med101	1	67	1	2	1.40366	25.1099	3.63912	69.1952	19.7032	2.59937	27.8132	0	14.0366	4.9388	0	30.0487	0	0	1.76757	210.549
Med101	1	68	1	3	1.26923	11.3761	0	38.735	14.1026	2.82051	30.8376	8.93162	6.58119	1.59829	0	72.5341	0	0	0.658119	220.611
Med102	1	67	2	1	0.297137	21.8608	12.0553	50.386	0	0.297137	5.17867	19.0592	15.7907	5.09378	9.46594	42.5755	8.48963	0	0.297137	75.9397
Med102	1	68	2	2
Med102	1	68	2	3
Med103	2	77	1	1	1.90959	42.2782	1.71863	43.9205	21.0054	0.763834	33.1122	25.5885	2.40608	1.90959	6.49259	14.2455	6.68355	0	0.687451	181.372
Med103	2	77	1	2
Med103	2	77	1	3
Med104	1	76	1	1	0	5.68633	10.0305	43.9013	7.06376	0	60.1832	4.34421	12.7148	6.71057	0	8.86502	2.61359	0	4.20294	259.593
Med104	1	77	1	2	0	6.88588	0	18.9362	1.43456	6.15266	55.5971	4.55871	31.624	0	0	64.4595	3.69797	0	3.82549	83.0131
Med104	1	77	1	3	3.00653	8.6374	0	31.8233	2.75174	2.77722	53.2767	2.29312	13.9625	8.40809	0	0.254791	1.24847	0	3.05749	137.714
Med105	2	70	1	1	0.833872	23.9506	9.26524	35.9491	0	0	20.4762	10.655	3.8914	0	22.1439	65.4126	0	0	3.05753	102.798
Med105	2	70	1	2	0	0	0	0	0	0	0	0	0	0	0	0	0	0	0	0
Med105	2	70	1	3	0	0	0	0	0	0	0	0	0	0	0	0	0	0	0	0
Med106	1	66	2	1	0	1.02308	0	30.3514	0	0.886671	13.5729	0	20.0524	28.6463	0	49.6536	0	0	3.27386	456.022
Med106	1	66	2	2
Med106	2	74	2	3	0	19.7064	0	35.3985	0	0.593017	2.28083	8.62155	14.0955	16.5588	0	21.4854	4.51605	0	1.96152	518.251
Med107	2	73	2	1	1.22344	9.00587	1.69922	29.8383	0	2.54883	9.68556	21.886	13.4578	3.73829	9.85548	26.6778	0	0	2.03907	327.44
Med107	2	73	2	2	0	4.39252	3.11526	19.4704	0	2.55452	9.12773	7.47664	6.85358	2.80374	7.78816	40.4673	3.58255	0	2.64798	242.461
Med107	2	80	1	3	0	6.9338	1.98109	17.7307	0	2.31127	8.08944	5.61308	7.75926	4.95272	6.60362	38.9284	0	0	1.35374	256.749
Med108	2	80	1	1	0	9.52442	0	61.4946	0	7.61954	16.3572	0	8.6548	3.934	3.31284	34.8262	3.39566	30.768	0	183.407
Med108	2	80	1	2	0	16.4533	0	62.8602	0	6.17	38.6548	2.84769	12.6564	6.85556	7.91026	65.2333	0	20.8831	0	226.761
Med108	2	70	1	3	5.85472	53.3379	0	58.9621	5.76252	8.06753	20.7451	1.2908	8.25193	16.5961	8.29803	11.7555	2.30501	27.3835	0	163.425
Med109	2	69	1	1	0.968859	21.6056	14.4844	47.3772	0	0	49.1211	3.39101	5.76471	0	16.3737	22.0415	0	31.1973	2.66436	212.325
Med109	2	70	1	2	0.755976	61.7599	4.99601	38.2261	5.52191	4.76593	44.9312	3.28685	10.2221	0	3.28685	15.9412	0	9.76195	1.41335	135.287
Med109	1	67	1	3	0.683725	20.9676	6.49538	38.5925	0	1.13954	51.2034	13.2187	6.19151	13.4846	10.5218	16.5993	0	11.2815	3.95041	154.218
Med110	1	66	1	1	0.445779	6.55932	4.13938	7.03694	7.64193	0	40.0883	7.32352	12.4818	5.73145	0	46.2974	2.64283	23.6581	1.4647	144.178
Med110	1	67	1	2	6.17091	26.163	0	29.8824	7.22758	1.268	57.2711	8.28424	7.98837	7.60798	0	38.2935	0	25.1063	1.1412	181.873
Med110	2	69	2	3	5.76797	29.7895	0	81.7716	9.74225	12.3097	49.5202	9.14435	9.77742	2.81365	4.92388	1.12546	4.15013	33.9396	0.492388	149.123
Med112	2	68	2	1	1.73489	36.2434	0	19.4939	0	4.66843	59.6802	2.23959	2.49193	8.2013	7.255	27.916	0	2.33422	4.00602	168.095
Med112	2	69	2	2	0.53436	45.3018	0	4.95767	0	0	43.1644	3.77021	3.29522	5.19516	0	46.6377	2.96867	0	1.45465	187.412
Med112				3
Med113	2	69	1	1	0	11.5981	1.07532	43.0129	0	1.7666	64.4425	6.10629	5.68384	18.4725	1.53617	39.7101	0	0	0.576065	173.933
Med113	2	69	1	2	0.84171	47.5098	2.8057	23.8952	0	3.27332	51.2508	17.2083	3.08627	5.84521	13.0933	9.53938	14.6832	0	0	239.092
Med113	2	69	1	3	4.97642	20.3488	0	105.118	4.77191	11.9298	45.7081	19.633	5.01051	10.8391	3.23808	2.72681	2.72681	0	0	254.002
Med115	2	73	1	1	0.11105	62.2988	0	106.441	0	2.22099	31.0383	8.88396	4.66408	12.2154	14.7141	14.7141	0	0	0	308.385
Med115	2	73	1	2	5.3412	46.8933	0	76.333	14.5096	2.5234	33.9398	4.45801	12.1123	13.0796	6.43468	0.883191	0	8.32723	0	242.709
Med115	2	74	1	3	7.95096	37.1295	0	121.927	4.68807	26.2907	34.8792	14.1017	9.52615	10.1262	6.67581	0.562568	2.21277	11.1388	0	251.355
Med116	1	68	2	1	0.910078	19.2699	4.74823	63.7054	0	0	14.6404	15.6296	8.42811	0	11.2375	17.4893	0	30.3491	5.65831	108.181
Med116	1	68	2	2	0.50982	23.0269	0	14.8414	6.79761	4.95659	2.94563	3.85198	10.2814	9.20509	0	16.7674	0	25.2361	0.59479	156.203
Med116	1	74	2	3	0	25.4334	0	17.2985	0	0	20.8676	1.70413	11.8003	8.61712	15.4336	11.736	0	47.2655	1.51121	223.916
Med117	1	65	1	1	3.80579	13.854	9.56088	13.9004	0.997859	9.42164	14.4341	0.533738	5.0125	4.75723	4.47876	12.9258	2.80793	4.82685	0.162442	137.844
Med117	1	65	1	2	2.7338	43.4104	8.53186	76.8769	6.00836	2.97414	6.00836	0	10.3644	14.1196	4.32602	16.3728	0	17.8448	0.300418	78.1086
Med117	1	65	1	3	3.2133	33.7776	3.79523	31.5004	26.5666	1.51809	35.8017	2.65666	20.2412	13.5363	0	2.15063	0	3.3651	0.151809	72.4636
Med118	2	75	2	1	0	31.383	0.998266	28.1074	1.84055	0.280762	48.5407	0	18.4367	0	4.36742	26.3293	3.99307	0	5.05372	126.312
Med118	2	75	2	2	0	36.3375	0	37.2608	0.625481	0.744621	53.434	0	16.5008	0	0	19.2112	7.14836	0	0.476557	103.472
Med118	2	76	2	3	0	20.1231	0	41.6654	0.662358	0	59.7699	0	22.2994	0	0	13.0264	8.79989	0	0.851603	121.59
Med119	1	73	2	1	0.80337	23.7887	8.48001	42.4447	0	3.34737	60.6098	8.0337	10.8901	0	0	19.5487	5.71285	0	0	259.801
Med119	1	73	2	2	0	26.4468	0	53.006	0	0	57.6103	14.1499	13.42	0	17.7435	5.89579	6.17655	0	0.561504	256.439
Med119	1	73	2	3	1.52147	26.9896	0	48.224	0	0	27.5849	12.5687	10.518	0	19.0515	12.3702	11.4441	0	0	262.156
Med120	2	69	2	1	1.11978	20.3021	9.25035	37.0988	0	4.13832	66.067	4.38175	14.9466	0	8.0332	76.0963	6.23182	0	0	226.682
Med120	2	69	2	2	0.700265	18.7071	0	36.4138	0	0	70.2766	4.5017	20.5078	0	9.40356	10.2039	6.40242	0	1.35051	294.662
Med120	2	69	2	3	2.26653	26.6947	0	56.3484	0	0	25.4984	6.29591	7.42918	0	13.788	22.0987	6.86255	0	0	396.013
Med121	2	67	1	1	0.0833218	45.4104	8.79045	24.4133	0.208304	0	15.7062	2.16637	9.20706	5.62422	17.7059	43.7023	0.291626	0	0.958201	228.093
Med121	2	67	1	2	6.62589	46.1291	1.36839	30.1046	4.32123	2.73678	28.016	18.8334	7.022	5.58159	0	15.4484	2.16062	0	0	128.593
Med121	2	67	1	3	5.3644	31.7215	0	42.7721	11.0864	5.86508	39.8754	6.2227	6.32999	11.0864	0	8.69033	2.28881	4.43457	0	164.866
Med122	2	72	2	1	0	1.11051	19.3546	12.2685	0	2.74983	3.17288	4.49492	9.14848	0	8.56679	105.393	0	62.8231	0	255.734
Med122	2	72	2	2	0	15.6928	2.28335	21.8786	0	9.21642	2.57396	9.54855	2.40789	0	22.0862	48.9882	2.24183	36.9902	0.290608	224.598
Med122	2	72	2	3	0	47.6506	9.06899	49.4952	0	5.76419	0	25.2087	1.76768	0	0	49.572	2.84367	60.8698	0	508.171
Med123	1	72	1	1	0	11.7727	0	6.17632	13.9185	0	10.8738	20.7327	10.2649	0	10.7288	44.8871	3.33463	0	0.492946	125.295
Med123	1	72	1	2	4.61874	18.0243	0	22.3051	11.5468	4.56241	22.2206	6.75913	13.0958	6.33668	2.39386	17.2358	3.46405	0	2.64732	113.441
Med123	1	73	1	3	3.63045	32.4742	0	41.8335	3.93022	14.6884	18.8184	5.06265	7.6939	6.66138	0	33.7066	3.79699	0	0.699445	117.24
Med124	2	74	1	1	0	18.6349	0	13.4223	15.6377	0	27.9306	27.8003	8.90479	0	5.21256	43.1339	4.99537	0	0.477818	234.956
Med124	2	75	1	2	5.03162	19.6356	0	27.5205	12.7325	5.95204	24.5138	3.49759	7.67016	6.90314	2.60785	17.0584	3.28283	0	1.25791	181.875
Med124	2	75	1	3	3.32793	31.2734	4.74116	38.294	4.92352	1.73235	30.544	4.33087	6.74704	9.11762	0	19.7397	9.75586	0	1.09411	174.329
Med125	1	69	2	1	0.611737	32.942	0	48.266	9.14547	1.407	46.0332	3.36455	6.17854	8.04434	10.2772	32.942	3.0281	5.59739	0.275282	217.197
Med125	1	69	2	2	0.158296	22.5413	0	51.3194	4.59057	3.00761	63.4448	15.6079	8.16805	8.29469	17.2859	13.93	4.05237	7.85146	0	195.273
Med125	1	69	2	3	0.679917	8.5871	0	33.8196	1.88866	1.83829	25.3584	3.0974	10.929	9.94693	3.72695	16.3936	0	0	0	165.421
Med126	1	66	2	1	0	0.341674	0	24.2247	14.5211	2.08421	19.7487	5.33011	5.67179	0	0	84.2226	3.3484	15.2387	0	108.208
Med126	1	66	2	2	0	1.95487	0	21.5035	2.63482	5.97793	12.6075	22.2685	18.3021	2.63482	5.66628	22.8635	0	12.6358	0	107.319
Med126	1	66	2	3	0	7.63007	0	16.5823	0	0	16.8853	29.8316	0	0	0	39.9132	9.14506	0	0	149.103
Med127	1	68	2	1	0	4.17667	4.74469	23.0218	6.68266	1.67067	26.3965	8.65405	1.83773	3.0072	13.3653	46.1104	0	10.592	3.84253	114.04
Med127	1	68	2	2	0	12.3887	0	11.1898	0	0	42.7609	17.5839	10.0308	0	11.989	34.3286	4.39598	0	0.799269	82.9641
Med127	1	68	2	3	0	2.68032	0	22.9317	0	2.0847	33.8019	10.7809	4.40764	0	7.14753	50.3305	0	0	2.35273	78.8313
Med129	2	65	1	1	0	18.5419	14.07	22.1048	0	0.908915	29.8851	2.1814	3.38117	7.7076	1.30884	42.1373	1.34519	0	0	178.693
Med129	2	66	1	2
Med129	2	66	1	3
Med130	2	70	1	1	0.771063	29.3861	10.0238	27.4584	0	0	71.923	3.85531	5.82581	0	11.0519	47.506	0	0	0.899573	314.465
Med130	2	70	1	2	4.56675	32.7224	0	18.5547	2.87669	3.23628	39.123	7.55132	1.94177	11.1472	0	31.5717	4.60271	0	0.287669	186.661
Med130	2	71	1	3	2.67628	41.3908	4.50936	20.1271	3.48284	2.19969	55.6154	16.4976	7.44227	8.43213	8.06552	16.4976	4.1794	0	0	248.565
Med131	1	75	2	1	1.1422	12.2469	0	37.5655	5.33025	0	0.983557	6.44071	21.2258	0	14.5947	32.8699	4.09287	0	2.0623	124.721
Med131	1	76	2	2	1.19695	23.9057	0	56.855	0.831214	0.631722	24.9697	22.0438	20.3149	0	6.15098	17.8212	0	0	2.06141	158.197
Med131	1	76	2	3	0	12.3438	0	10.1687	0	0	17.8632	7.06915	8.86363	1.35945	10.0599	47.6352	0	0	4.18711	132.193
Med132	1	79	2	1	0	13.1553	0	16.6728	0	0	13.9643	11.7131	6.96457	2.11048	0	33.3807	4.32648	0	10.5172	291.035
Med132	1	79	2	2	6.15073	12.1604	0	7.92823	5.86858	0.874645	14.5868	8.57716	7.22287	0	2.11608	10.919	2.56751	0	7.0818	152.414
Med132	1	80	2	3	4.91605	14.1044	0	8.63236	0	0.555982	24.0535	2.77991	7.69597	0	0	38.948	3.59925	0	4.68196	198.164
Med134	2	65	2	1	2.43598	12.8807	9.47698	29.5989	2.50272	0	29.2318	12.4469	11.7461	4.67175	6.34023	23.4589	1.00109	16.518	1.43489	142.322
Med134	2	65	2	2	1.30128	13.4827	12.073	15.037	0	1.0844	17.4588	13.1212	10.1572	7.22933	13.4827	13.555	3.61467	8.06071	0	185.794
Med134	2	65	2	3	0	9.83342	4.79679	15.8294	0	2.91234	11.5808	20.6605	13.3967	5.13942	0.685256	44.1647	2.0215	0	1.64461	197.08
Med135	2	76	2	1	0	12.0294	2.65177	39.3185	0	0	19.5749	16.3928	10.6071	11.3303	7.2321	36.4739	5.37586	7.15978	2.12142	218.265
Med135	2	76	2	2	1.63928	18.3301	4.1727	49.0591	0	0.35766	24.5295	8.64345	6.31866	3.04011	5.18607	51.354	3.5766	8.85209	0.447075	315.814
Med135	2	76	2	3	0	25.2132	13.7552	59.4169	6.69326	0	25.0997	9.64284	5.61553	0	11.8834	23.0294	3.40335	15.4569	4.08403	224.65
Med136	1	79	1	1	0	13.7544	5.00881	22.7782	3.02119	0	12.0053	8.03	4.69079	6.08213	7.15545	45.2383	0	24.408	0.278267	197.928
Med136	1	80	1	2	5.8751	17.4865	0	49.4527	3.70085	3.23825	26.2761	9.66848	6.06015	15.7286	0	28.4503	0	14.6646	0.740171	219.738
Med136	1	80	1	3	5.29931	18.5691	0	38.3015	12.7097	3.01587	38.043	10.4263	5.29931	17.3197	0	17.4059	0	12.7959	0.301587	219.727
Med137	2	70	2	1	0	2.36036	10.2998	31.1997	0	0	25.2773	6.35151	11.5443	4.29156	0	46.1343	11.5872	4.24865	0.171663	208.87
Med137	2	70	2	2	0	16.9879	12.7297	41.5956	0	3.36172	8.74046	9.90586	6.36485	12.5504	10.4437	25.4594	0	0	0.0896458	154.998
Med137	2	70	2	3	0	10.4687	5.37893	53.3844	6.82488	0	38.9828	6.94055	7.05623	0	23.0773	28.1092	0	0	0	212.844
Med138	1	67	2	1	0.950125	10.3458	0	5.84151	0	6.75645	15.4835	0.844556	8.33999	10.7329	8.79745	35.6121	6.51012	0	0.492657	153.639
Med138	1	67	2	2	0	8.51496	5.0088	0	0	3.61349	18.5326	3.36305	9.51672	16.9941	19.6774	26.1173	0	0	0	148.296
Med138	1	67	2	3	0.697454	6.39333	3.0998	8.52444	0	4.41721	17.7851	2.78982	11.818	13.1354	5.42464	24.5271	5.03717	0	0	200.867
Med139	2	65	2	1	1.36686	13.1624	0	15.4405	0	2.53123	23.8948	2.2781	10.8336	13.9217	12.6561	43.5877	6.32807	35.0828	0.708743	235.86
Med139	2	65	2	2	0	19.9761	5.74261	9.2292	0	0	22.068	8.61392	8.73697	19.4839	18.4584	38.5575	0	16.2434	0	149.554
Med139	2	65	2	3	0.889837	10.8758	3.95483	30.996	0	5.63564	23.0863	3.06499	11.9139	10.5792	6.92096	26.8929	6.4266	10.7769	0	148.059
Med140	2	75	2	1	0	19.7058	6.18382	29.8472	0	0	32.2383	4.57602	11.9142	6.18382	15.2534	14.5526	4.04009	0	0	71.3612
Med140	2	75	2	2	0	28.4365	5.581	45.5516	6.37828	0	50.3353	3.61436	12.3845	7.97285	11.6935	14.5106	1.96664	0	0.90359	153.291
Med140	2	75	2	3
Med141	1	74	1	1	0	33.7931	6.85496	33.5337	0	1.37099	17.2671	9.37462	6.96612	0	28.3832	32.4592	0	27.7904	2.11207	110.606
Med141	1	75	1	2	2.81581	47.4831	3.62584	55.352	4.32015	3.27869	36.4127	13.8862	5.43876	12.5362	5.32305	6.36451	0	45.9016	0.655737	154.06
Med141	1	75	1	3	2.47805	66.7271	9.77703	49.6061	5.04621	4.28027	51.5434	19.5991	11.6243	10.3628	6.75832	4.00994	0	33.4762	0.765943	171.166
Med142	2	69	1	1	0	45.4114	8.15517	40.3466	0	4.72141	11.9323	7.6401	8.28393	0	31.2042	36.0544	0	17.2975	0.343375	144.304
Med142	2	69	1	2	2.3064	56.1077	4.16927	58.0593	5.98778	1.33062	23.8624	11.6651	7.36275	14.415	6.12084	2.66123	0	52.6924	0.576601	176.262
Med142	2	70	1	3	2.57853	74.4679	6.18847	58.5326	5.51805	3.86779	23.2067	20.2157	8.87014	15.9869	7.73558	4.8992	0	45.9494	1.08298	184.623
Med143	2	79	2	1	0	20.6412	29.2349	20.6001	5.67428	0	4.97528	20.0656	9.95055	16.036	7.81242	46.5044	3.28944	0	1.76807	163.197
Med143	2	79	2	2	0.191881	6.25533	11.1291	21.2988	0	0	9.32543	6.52397	10.4383	3.83763	1.91881	63.8197	3.60737	0	3.64575	179.716
Med143	2	79	2	3	0	15.4184	19.8159	41.4778	2.38877	0	8.19783	5.15758	10.3694	9.22935	21.6075	33.5514	3.09455	0	3.31171	195.445
Med145	2	71	2	1	0	10.2137	0	26.2551	0	0.568557	47.0887	4.93426	2.23362	0.670085	17.0567	56.2059	4.67029	10.8635	5.25915	111.762
Med145	2	71	2	2	0	6.93014	0	34.3842	0	0	30.8895	5.44934	12.5276	2.36928	0	87.8114	0	17.5919	1.74734	119.234
Med145	2	71	2	3	0	15.802	0	28.7477	0	0	65.3593	8.23482	5.19313	0	9.12507	45.5141	0	11.0169	1.7805	192.591
Med146	1	81	1	1	0	17.8256	0	22.5063	0	0	19.5419	10.6096	2.18432	4.60268	14.2371	63.8134	0	21.2581	0.585086	110.074
Med146	1	81	1	2	1.87145	10.8544	0	26.9148	0	2.51795	30.7938	6.80527	10.344	8.50659	2.55198	19.5992	0	11.8071	0	121.338
Med146	1	81	1	3	1.32273	25.3524	0	22.8906	7.89965	4.40911	28.7694	11.4637	2.27804	11.0228	8.19359	15.0645	0	23.6622	0	151.526
Med147	1	74	2	1	0	11.4856	9.47687	3.91436	0	1.93143	25.5979	2.57524	1.54514	4.84145	7.33943	56.4492	0	15.4514	1.49364	240.167
Med147	1	74	2	2	0.0361451	17.1328	5.06031	17.7834	5.42176	2.27714	35.3137	5.06031	8.34951	6.00008	7.19287	27.904	2.67474	0	1.80725	329.029
Med147	1	74	2	3	0	14.5497	1.73211	16.6716	0	3.46423	51.487	0	4.76331	0	10.4793	21.9112	6.45212	0	2.12184	420.99
Med148	2	67	1	1	0.4048	18.5472	5.4832	29.5504	2.944	5.336	31.1696	2.9808	8.5008	8.096	5.1152	51.0784	0	0	0.5152	228.16
Med148	2	67	1	2	6.29132	47.6816	3.23764	31.4198	9.19784	2.57539	25.0917	2.94331	7.76298	9.41859	9.16105	2.90652	0	10.927	0	242.97
Med148	2	67	1	3	7.39782	34.8754	1.09458	28.9874	4.718	2.64208	35.2529	4.98221	5.85032	8.71886	8.11496	5.96355	0	5.62385	0	197.061
Med149	1	75	1	1	0	12.886	4.88227	20.7696	0	0	22.2904	23.8111	7.60353	0	4.80223	35.1763	0	15.8474	1.36063	170.919
Med149	1	75	1	2	1.72867	13.1001	0	42.1634	6.07736	8.10315	24.0664	16.0172	6.37448	14.2886	8.10315	11.5065	0	17.3948	0	83.8136
Med149	1	75	1	3	0.809746	21.7732	9.62698	44.671	8.99718	18.8941	22.8078	7.51264	12.776	7.15275	15.2952	5.48828	2.65417	33.4245	1.30459	244.138
Med150	2	71	1	1	0	12.4189	8.52867	18.5536	0	1.89526	52.369	4.18952	8.67829	0	20.1995	39.1022	0	0	1.79551	207.78
Med150	2	71	1	2	1.49947	14.6102	0	31.1813	12.4956	3.11429	51.6356	4.57531	3.80635	11.7266	1.9224	37.6021	0	0	1.61481	163.673
Med150	2	71	1	3	2.60842	10.4337	0	67.2024	3.55693	33.53	70.5696	6.0705	7.87268	3.79406	4.74258	14.6546	0	0	1.42277	210.571
Med152	2	72	1	1	0	4.28392	0	30.671	0	7.01833	77.2472	4.32949	19.8245	0	2.68884	16.2698	5.01309	0	2.00524	350.825
Med152	2	72	1	2
Med152	2	72	1	3
Med154	1	69	2	1	0.935391	5.63833	12.9656	66.2309	0	4.52106	16.6552	5.71628	9.74366	2.59831	0	30.712	15.6418	6.4438	0	136.567
Med154	1	69	2	2	0	39.5157	0	85.9797	0	3.52349	16.7283	5.10412	7.83729	10.6692	12.8426	16.2344	0	16.86	0	129.282
Med154	1	70	2	3	0	47.1042	8.65087	87.0069	0	0.90585	2.80814	7.2468	9.10379	8.60558	7.92619	32.6106	0	18.3888	1.76641	266.592
Med155	2	77	1	1	0	9.5004	6.13208	9.15493	0	0	24.4419	7.60032	21.4623	3.45469	0	74.4054	0	0	0.604571	224.814
Med155	2	77	1	2	5.45282	58.0059	0	25.0314	8.58711	1.28807	49.8911	8.80179	0	8.15775	1.28807	14.641	0	12.7519	0	197.375
Med155	2	78	1	3	1.11844	16.7767	0	24.8543	20.8155	2.85825	82.7648	5.033	8.88541	5.9029	0	66.7338	0	18.4543	0	270.291
Med156	2	67	2	1	0	25.5412	10.9144	16.4459	6.42243	0	35.9359	2.82141	13.1047	8.53849	16.1489	22.7941	0	0	2.37593	169.582
Med156	2	67	2	2	0.735524	25.9068	5.1078	23.8228	0	1.02156	10.3791	7.76386	14.7513	3.88193	6.7423	34.7331	4.08624	0	0.16345	159.077
Med156	2	67	2	3	0.492923	17.088	5.8603	41.6794	0	0.328615	13.6923	2.19077	14.7877	6.84615	4.71015	18.7858	4.54584	0	0.712	275.38
Med157	1	65	1	1	0.599693	16.4582	3.76474	9.06203	0	0	33.4495	4.79754	14.1261	0	5.56382	46.7761	0	0	3.43158	117.473
Med157	1	66	1	2	1.97061	41.6337	1.79147	44.2492	0	4.29952	49.7669	3.22464	12.8986	4.47867	8.95733	8.20492	4.58616	0	2.93801	169.222
Med157	1	66	1	3	6.01414	37.6984	5.86745	33.9212	2.75037	4.40059	30.4007	3.30044	11.0015	8.69116	0	28.0904	1.83358	1.10015	1.65022	115.515
Med159	1	67	2	1	0.162101	30.3128	2.13973	30.1183	3.56622	0	80.6289	17.8311	10.3096	0	3.95526	21.1055	0	0	1.45891	397.309
Med159	1	67	2	2	0	11.109	0	29.6906	0	0	107.373	10.4696	5.31473	0	0.799207	43.1972	0	0	0	427.016
Med159	1	67	2	3	0.167842	11.2454	8.15712	45.0488	11.0776	1.71199	98.5904	6.37799	9.56699	0.234979	12.7224	8.35853	3.69252	0	0	350.958
Med160	2	64	2	1	0.225255	15.9931	2.74811	38.7439	0	0.45051	59.7827	9.91122	10.2266	9.46071	9.68597	21.4893	4.5051	8.9201	0	243.366
Med160	2	65	2	2	0.929975	34.3574	17.1529	38.2323	0	0.413322	49.9086	14.9829	10.7464	14.9829	3.09992	34.5124	0	0	0.413322	256.156
Med160	2	65	2	3	0	16.652	2.84043	27.8717	3.55053	0.177527	28.8303	3.37301	4.0121	5.85838	3.62154	43.352	0	0	0.0710107	202.664
Med162	1	65	2	1	0	19.4105	0	16.6376	0	1.73308	24.2631	20.797	3.11954	12.1316	3.11954	32.2006	0	0	0	262.562
Med162	1	65	2	2	0	11.0812	3.16605	39.5123	0	0	16.1152	8.64331	10.1313	0	20.5793	24.1253	0	0	0.791511	196.611
Med162	1	65	2	3	0	14.8503	0	16.8086	0	1.83589	25.0089	37.1258	6.28282	3.87577	2.44785	29.1294	0	14.8503	0	211.127
Med163	1	70	2	1
Med163	1	71	2	2
Med163	1	71	2	3
Med164	2	70	2	1
Med164	2	70	2	2
Med164	2	70	2	3
Med166	1	66	2	1	0.52492	33.6324	0	42.706	0	2.6246	14.6228	16.31	12.5231	18.2222	0	11.9607	3.67444	13.9104	0.599909	240.938
Med166	1	66	2	2	0.747633	24.5611	0	27.0809	0	0	5.15036	8.58394	12.5436	0	11.3529	29.1023	2.71363	7.67016	0.221521	331.285
Med166	1	66	2	3	0.63563	22.5295	2.11877	42.9756	0	1.05938	12.9598	6.70942	7.83943	6.70942	4.59066	40.0447	3.46065	6.99193	0.565004	371.066
Med167	2	74	2	1	0	21.2886	13.4955	17.9623	0	4.84696	21.2411	9.50385	5.13208	0	10.9294	39.5835	15.919	0	0	160.758
Med167	2	74	2	2	0	24.3953	0	26.0391	0	3.48504	61.6786	3.94532	2.16993	0	27.5515	22.4226	11.6387	0	0.460288	215.217
Med167	2	74	2	3	0	28.2794	8.26367	17.6111	0	10.6344	5.65587	0	9.21196	4.26731	12.7342	16.6628	2.91261	0	0	101.162
Med168	1	72	1	1	0	9.17838	7.31909	0	0	0	85.8223	5.45981	7.11251	17.3238	0	19.8619	0	42.3799	0	112.236
Med168	1	73	1	2	2.54411	11.9875	0	22.897	1.50922	6.89928	46.6564	6.03687	10.0902	13.583	4.31205	61.6192	0	62.9559	0	106.076
Med168	1	73	1	3	5.38353	20.2435	0	19.6536	3.13424	2.39678	48.1567	3.31861	6.71097	14.0119	6.41598	13.2376	0	27.397	0	215.784
Med169	2	71	1	1	0.037419	2.46965	0	46.0628	0	3.7419	43.6306	19.9443	9.57927	0	0	70.5723	4.26577	0	1.15999	194.953
Med169	2	71	1	2	4.89493	30.8447	6.20248	63.0306	8.38172	4.3585	43.3838	11.1309	11.0639	3.18505	10.6616	3.18505	2.34688	0	2.11219	192.143
Med169	2	71	1	3	4.37308	25.879	4.79241	98.6039	8.53649	14.0777	37.6504	5.90066	12.5501	5.69099	3.74407	4.6127	2.93535	0	1.28796	170.79
Med170	2	71	2	1	0	15.8814	3.61689	28.8693	0	0	65.9589	2.95927	22.622	3.12368	10.5219	22.2603	0	0	0	159.472
Med170	2	72	2	2	0	21.418	12.3999	21.8227	0	0	61.1612	5.49179	18.9611	2.60138	20.2329	12.8624	0	0	0	171.98
Med170	2	72	2	3	0.463878	15.1534	12.6278	23.0651	0	0	51.1812	6.95817	12.3185	0	11.7	7.67976	10.3084	0	0	153.595
Med171	1	79	2	1	0.861499	6.70055	0	35.4651	0	1.91444	30.6311	0	14.3583	4.78611	6.22194	50.6849	0	0	7.32274	144.732
Med171	1	80	2	2	3.65464	9.31932	0	18.8945	0	0	22.8415	3.65464	11.6583	0.986752	21.3065	26.7885	0	0	3.61809	146.916
Med171	1	80	2	3	1.78142	10.3646	0	33.8793	0	0.550619	14.1542	6.47788	11.6602	8.58318	3.88673	22.8021	2.07292	0	2.55876	148.019
Med172	2	67	1	1	0	8.96622	0	30.9199	0	3.26044	26.2466	6.46655	12.1723	0	13.7482	72.4362	2.71704	0	2.55401	306.101
Med172	2	67	1	2	2.89296	6.28315	0	22.8273	0	4.52025	21.426	3.48059	9.80895	2.16972	0	61.9727	2.93816	22.3752	2.93816	394.166
Med172	2	67	1	3	3.30957	29.3649	0	49.6436	0	42.182	36.7664	6.01741	8.54472	11.4331	0	26.6571	3.0087	0	0	391.673

## Sheet: 3. nutrient intakes 
TABLE S1.3 MEDLEY RAW DATA, NUTRIENT INTAKES IN GRAMS/MG/UG
StudyID	Gender (1=Male, 2=Female)	Diet allocation (1=Med, 2=Hab)	Age (y)	BMI (kg/m2)	Visit	energy_kJ	energy_mJ	kj-from-protein_%	kj-from-fat_%	kj-from-saturated-fat_%	kj-from-monounsaturated-fat_%	kj-from-carbohydrate_%	kj-from-alcohol_%	fat-as-mono_%	fat-as-poly_%	fat-as-saturated_%	cholesterol_mg	sugars_g	MUFA:SFA	dietary-fibre_g	vitamin-c_mg	vitamin-e_mg	total-folate_µg	total-vitamin-a-equivalents_µg	beta-carotene-equivalents_µg	sodium_mg	potassium_mg	calcium_mg	iron_mg	zinc_mg	long-chain-n3_mg	f18d2n6-linoleic_g	f18d3n3-linolenic-(ala)_g	magnesium_mg
Med001	2	2	68	23.6055	1	8500.28	8.50028	14.1333	36.0265	10.2832	17.5419	47.3326	1.28346	52.7344	16.3523	30.9132	239.261	106.899	1.70589	33.9138	256.314	19.7355	446.334	475.433	1271.4	2653.18	3550.18	968.983	14.6092	9.112	111.418	11.1901	1.18983	444.93
Med001	2	2	68	23.3464	2	5727.84	5.72783	24.2353	33.6463	7.90401	17.1089	36.1982	4.78005	48.6001	25.0768	26.3231	448.825	44.1538	2.16459	18.8252	71.169	12.9816	298.438	496.364	2104.72	1308.66	2776.4	615.129	10.4544	11.7056	1129.11	9.52024	0.935471	338.152
Med001	2	2	68	23.7683	3	9448.13	9.44813	20.765	49.0092	11.5417	26.5116	29.0474	0.0193372	58.0934	16.616	25.2906	437.035	57.1882	2.29703	34.3917	171.459	34.8623	354.409	2229.3	13033.8	1824.16	4620.06	948.278	14.9617	19.6119	1316	16.3998	1.07872	547.455
Med002	2	1	66	21.8688	1	8222.22	8.22222	19.6309	34.7605	12.8765	13.8697	38.9997	6.3678	43.9679	15.2126	40.8195	385.694	115.552	1.07713	19.7898	155.691	9.90453	345.436	1075.95	5063.78	1462.31	3765.73	1223.13	10.7798	8.89031	1637.97	7.90625	0.841203	451.267
Med002	2	1	66	21.4341	2	8913.41	8.91341	14.8773	42.209	9.38819	23.0384	34.193	7.49392	58.302	17.9398	23.7582	279.902	86.3979	2.45397	25.4051	171.488	16.3237	351.798	931.958	4127.75	1593.9	3312.54	707.712	10.6621	9.60774	131.665	15.2432	1.60924	526.114
Med002	2	1	67	21.3599	3	9484.97	9.48497	17.3507	46.1378	9.70227	25.9993	31.7391	3.82408	60.4025	17.0569	22.5406	351.034	72.7136	2.67972	28.5204	170.227	20.8264	355.013	1107.97	6166.1	1949.04	3687.38	740.947	14.6294	12.7493	311.084	16.916	1.38324	579.797
Med003	2	2	72	33.3428	1	11660.2	11.6602	18.5368	46.8423	16.7444	19.8699	32.7558	0.902163	45.2966	16.5317	38.1717	387.134	107.64	1.18665	34.0798	58.961	15.4964	435.624	1202.85	5634.98	2598.95	4360.58	1075.18	17.963	17.9869	382.836	20.0155	1.41745	578.757
Med003	2	2	72	33.0344	2	8662.57	8.66257	23.0114	29.0111	11.6278	12.2009	39.4993	6.18662	41.976	14.879	43.1451	291.001	89.2673	1.04929	27.0131	58.9407	7.96995	212.099	435.281	1359.06	2387.77	3508.41	999	11.3369	14.3523	197.879	8.16846	0.928623	412.498
Med003	2	2	72	33.2353	3	7853.18	7.85318	25.9481	30.924	12.4932	10.3396	37.5628	2.95994	36.4729	19.4574	44.0697	653.302	112.786	0.827619	23.4623	148.314	10.1585	600.697		4549.94	1810.36	3680.61	1036.3	13.9222	11.6905	424.578	10.1459	0.841553	416.509
Med004	2	1	78	33.2577	1	6149.89	6.14989	21.0614	19.865	8.67891	6.77967	57.5616	0	37.7261	13.9793	48.2946	244.192	131.159	0.781166	23.2776	84.9803	4.13678	311.202	693.951	2313.78	1521.89	3401.78	1341.06	12.8564	8.39373	57.0852	3.52368	0.511104	420.484
Med004	2	1	78	33.1859	2	5230.12	5.23012	24.8415	26.5922	6.23076	14.6521	47.3109	0	57.3941	18.1992	24.4067	99.1219	69.8562	2.35157	26.018	105.171	5.80377	280.419	646.144	2952.61	1735.11	2854.85	577.094	9.86044	7.68341	538.312	5.10577	0.835871	301
Med004	2	1	79	33.4657	3	6541.25	6.54125	21.8823	41.437	7.89508	21.7272	35.6103	0	56.9087	22.4123	20.679	258.897	83.9636	2.752	20.5932	101.083	14.0293	368.796	316.282	1183.41	1512.09	2294.89	875.637	10.6045	6.12949	502.852	13.2057	1.24871	305.518
Med005	1	1	80	26.5096	1	9807.47	9.80747	18.6514	28.3391	11.9696	10.5683	51.6723	0	41.104	12.342	46.554	716.346	185.083	0.882932	30.2037	212.91	8.92055	467.186	1000.43	2432.49	2216.23	4626.71	1512.2	19.9106	11.7444	234.008	6.70034	1.281	464.016
Med005	1	1	80	25.6952	2	8585	8.585	19.9821	29.0012	6.51603	15.2419	49.8042	0	41.104	21.4836	23.514	111.208	123.905	2.33914	41.0717	107.531	9.93031	439.908	898.335	3589.62	2869.91	3883.45	934.881	14.4052	11.3657	768.199	11.5343	1.58644	470.421
Med005	1	1	81	25.7131	3	10150.9	10.1509	18.2341	39.5673	8.80535	21.0735	40.719	0	57.0788	19.0714	23.8498	292.429	126.157	2.39326	39.0442	183.64	17.1698	573.896	960.716	3202.89	2237.33	3198.59	986.528	16.029	9.84991	381.571	16.1122	2.73244	402.261
Med006	2	1	82	22.8865	1	7657.26	7.65726	21.8174	33.6993	8.30912	15.4454	42.8016	0	48.9658	24.6922	26.342	287.244	86.6379	1.85885	29.9109	101.507	8.07099	350.69	766.293	4028.98	2356.78	3619.95	554.231	14.9286	10.7677	101.367	14.1703	1.55204	484.186
Med006	2	1	82	22.895	2	6492.06	6.49206	21.1089	36.5627	7.4549	14.5827	39.6426	1.74587	44.2144	33.1825	22.6031	241.445	65.2769	1.95612	27.012	68.0784	8.56619	241.765	1207.6	7447.77	1275.48	3210.16	521.623	13.0067	8.53885	841.838	16.252	0.767478	405.014
Med006	2	1	83	23.0452	3	6193.7	6.1937	17.3043	34.4753	8.20103	17.2981	45.691	1.63165	54.7357	19.314	25.9502	236.013	90.7057	2.10926	23.8472	94.4296	10.6721	232.478	2180.93	12940.4	1422.49	3066.51	495.831	9.84161	7.27637	243.586	8.57343	0.859249	271.115
Med007	1	2	81	24.7133	1	8269.14	8.26914	18.765	21.5237	8.1949	7.6985	49.3683	8.88818	39.9856	17.4506	42.5638	171.739	83.665	0.939427	28.6513	86.0023	4.34291	373.278	653.649	3306.18	1724.29	3549.6	753.734	17.1177	13.2579	126.442	6.32033	1.06976	416.185
Med007	1	2	81	24.261	2	8873.02	8.87302	22.2107	29.7953	9.90663	9.50894	36.7286	10.3541	44.7674	18.0003	37.2323	372.015	90.3624	0.959857	23.4779	20.4045	8.79254	530.329	645.231	2146.11	1772.88	3430.56	752.651	12.7288	13.8507	425.72	10.1868	1.41912	437.61
Med007	1	2	81	24.2846	3	10945.8	10.9458	20.9384	34.485	12.151	14.3268	34.0341	9.29015	45.2856	16.3062	38.4081	412.737	76.2617	1.17906	26.3994	75.8046	10.995	450.531	2215.08	1559.78	2357.49	3574.86	715.34	13.577	15.8069	180.293	13.4442	1.42381	431.729
Med008	1	1	75	25.48	1	8672.94	8.67294	26.1557	25.8725	7.62481	11.7025	40.6232	7.24378	48.8099	19.3878	31.8024	445.125	67.3464	1.53479	24.1708	98.1317	10.3157	538.38	1496.85	5413.67	2569.53	3651.92	490.219	11.6613	10.3239	183.794	9.60332	0.899069	375.655
Med008	1	1	75	25.2965	2	9344.4	9.3444	19.7638	31.7735	8.36107	14.0881	43.2109	3.95134	48.1995	23.1948	28.6057	257.055	101.82	1.68496	45.127	130.375	16.7722	497.584	1268.69	6572.61	2404.91	4318.76	711.727	14.6365	11.5806	2003.05	13.4766	1.55181	493.422
Med008	1	1	75	25.163	3	8070.77	8.07077	25.2575	28.8137	7.31463	12.166	39.7923	4.93276	47.0479	24.6654	28.2868	320.416	101.096	1.66325	29.7962	124.229	13.7319	485.801	824.637	4414.33	1704.5	3487.71	759.606	11.9767	12.347	1904.13	10.8935	1.0146	421.268
Med009	2	1	72	25.2923	1	8615.6	8.6156	19.3315	27.6831	9.57546	11.4862	43.3246	7.30007	45.2005	17.1182	37.6813	255.694	89.591	1.19955	27.3151	135.929	10.1112	374.33	853.163	2030.35	2051.74	3871.82	856.225	9.32359	8.04439	315.678	8.3952	1.50122	389.731
Med009	2	1	72	24.8877	2	7519.96	7.51996	21.4772	30.114	8.45619	13.3929	44.9884	4.90998	48.6308	20.664	30.7052	208.541	84.2365	1.5838	36.5169	92.5339	11.5232	324.23	1231.6	6038.71	1831.8	3560.8	695.942	11.0854	9.5607	1699.19	8.4129	1.29475	373.712
Med009	2	1	73	24.396	3	7435.87	7.43587	26.1585	31.9188	7.36983	12.8097	34.9385	5.76578	44.7034	29.5774	25.7193	277.284	70.264	1.73813	25.4558	125.559	15.4982	436.129	792.444	4387.06	1368.92	3162.37	712.214	10.3143	10.5217	1886.06	13.6805	1.40189	387.272
Med010	1	2	82	34.0432	1	7137.07	7.13707	21.6368	37.7229	7.81506	19.9886	33.979	5.02028	57.1112	20.5596	22.3292	276.445	42.3857	2.5577	25.2252	92.0952	13.1704	203.883	902.526	5243.73	1049.7	3320.86	311.637	9.26576	7.40925	1390.19	10.9141	1.16251	450.971
Med010	1	2	82	34.2685	2	6359.27	6.35927	25.6384	30.6414	8.44447	48.8367	36.2693	6.3592	47.0873	22.9432	29.9695	271.918	34.989	5.78328	27.6187	253.309	13.4182	314.078	1389.72	8407.53	1209.97	3753.14	670.332	13.248	12.2283	1474.84	8.42652	0.851656	530.673
Med010	1	2	83	34.053	3	7068.27	7.06827	18.2583	32.5754	7.48326	17.9333	43.7708	4.54924	59.5861	15.5496	24.8643	125.558	55.1563	2.39645	32.0228	112.578	11.7188	310.733	726.931	4614.17	1833.12	2704.15	277.556	11.2985	10.6047	1006.88	6.92307	0.663276	284.449
Med011	2	2	76	24.996	1	8114.26	8.11426	18.4107	38.6228	9.37696	18.3829	42.0254	1.98258	50.9377	23.0794	25.9829	265.54	70.8668	1.96043	20.1857	52.1592	10.6934	198.348	484.509	2732.21	1852.21	2298	407.175	9.38385	6.84948	789.899	15.5292	1.72694	279.671
Med011	2	2	76	24.4752	2	10448	10.448	17.4637	56.9573	12.1568	8.22065	24.7167	0	55.4689	21.8456	22.6855	217.207	56.2663	0.676219	30.7291	59.8256	26.139	453.78	706.988	3841.77	1795.73	3233.97	534.925	12.9429	10.6041	1775.79	28.3624	2.53857	376.534
Med011	2	2	76	24.3304	3	7554.59	7.55459	18.6501	55.3069	14.856	27.7031	25.0762	0	52.9955	18.5852	28.4193	196.335	47.0813	1.86477	22.1733	80.5396	15.8099	213.764	919.628	4746.44	1348.2	2833.7	450.685	9.60344	11.0031	232.323	17.315	1.82821	292.137
Med012	2	1	71	25.695	1	6991.08	6.99108	19.0762	37.051	10.7659	17.9584	35.7567	3.45644	52.5449	15.955	31.5001	161.166	87.7149	1.66809	33.2725	519.333	12.1644	569.625	726.642	3288.64	1429.67	4458.04	843.803	10.4776	7.58784	816.859	8.91633	0.582754	419.755
Med012	2	1	71	25.7747	2	8845.17	8.84517	14.0317	44.8267	8.06838	26.5812	36.1451	4.18352	63.966	16.6179	19.4161	109.106	78.3245	3.29449	32.4393	223.742	22.0672	386.615	916.485	5390.87	2110.54	3372.95	503.687	11.8833	7.80392	2109.13	13.3675	0.911127	369.135
Med012	2	1	71	25.5732	3	7827.09	7.82709	16.1411	46.8133	11.3675	26.4894	32.7327	3.39293	60.6779	13.2831	26.0391	172.509	90.4976	2.33026	30.3081	191.441	19.8567	344.868	806.815	3778.03	844.676	3204.32	768.379	11.5539	7.61769	1106.68	10.1255	0.814787	320.64
Med013	2	1	68	27.8883	1	8433.94	8.43394	17.0178	27.9211	10.1801	10.9332	53.2993	0	42.0555	18.7861	39.1585	168.841	121.648	1.07398	25.1742	111.161	8.77349	422.942	782.668	3075.38	2012.02	3657.74	1282.55	12.3985	8.93274	54.2567	9.21514	1.87972	535.782
Med013	2	1	68	26.7	2	6966.37	6.96637	18.3809	39.575	7.26795	22.0837	39.9771	1.05503	59.2227	21.2866	19.4907	87.3087	72.4644	3.03851	33.3301	86.2439	15.0305	340.748	486.216	2745.78	1545.18	3424.21	653.562	10.791	8.61527	104.668	13.3039	1.47008	427.898
Med013	2	1	68	26.143	3	8002.75	8.00275	19.3517	42.3715	9.90123	21.6896	35.6707	1.148	55.2355	19.5498	25.2147	313.839	82.1851	2.1906	30.7216	126.657	17.5118	410.782	730.768	2984.81	1558.95	3502.11	803.723	14.9175	13.8706	262.972	13.783	2.39404	433.035
Med014	1	2	76	20.4246	1	7230.7	7.2307	21.3215	36.5098	14.0257	14.8464	28.5965	11.1083	43.5048	15.3954	41.0999	230.108	67.3608	1.05851	23.2188	126.068	9.18265	294.021	1076.23	5679.54	1122.37	3565.73	496.239	12.9705	15.0354	144.77	9.46051	0.485857	390.019
Med014	1	2	77	20.4621	2	7294.36	7.29436	15.921	31.0288	12.3409	21.6799	37.7336	14.3687	40.8834	16.2673	42.8492	233.095	73.169	1.75675	20.0104	107.138	7.99361	168.787	801.567	3560.47	1577.14	3237.7	527.449	12.6989	11.5801	161.106	8.22529	0.69099	327.911
Med014	1	2	77	19.8163	3	5504.04	5.50404	21.8528	38.008	18.1337	12.826	31.1739	8.37906	36.4033	12.1292	51.4675	305.571	53.161	0.707306	16.4539	31.1513	6.02658	159.597	836.555	3014.49	1345.86	2070.14	461.933	7.89721	9.21931	117.925	5.14457	0.799187	221.001
Med015	2	1	68	26.6966	1	5801.29	5.80129	20.0338	30.1579	10.7453	12.1018	48.0462	0	44.0313	16.873	39.0956	180.372	94.2554	1.12625	21.5716	105.264	5.97385	301.612	1151.62	6159.18	1513.35	2526.55	532.59	7.39048	8.6374	73.5048	6.58805	0.802547	250.873
Med015	2	1	68	25.91	2	5901.35	5.90135	21.3966	33.046	9.95945	14.7339	44.2439	0	48.5828	18.5775	32.8397	225.095	68.3942	1.47939	28.4398	163.986	9.42394	456.434	1300.45	6809.04	1137.28	2810.89	739.024	12.5252	9.99239	233.355	7.9629	0.893464	306.345
Med015	2	1	68	26.1108	3	8363.55	8.36355	18.7307	41.9838	9.30261	19.9429	37.1128	1.09848	51.1474	24.9943	23.8583	179.873	80.3229	2.14379	35.2243	53.6548	17.5703	328.81	762.277	3978.99	1326.75	2680.82	1053.67	12.0507	10.6064	60.5188	20.0632	2.19817	390.363
Med016	1	2	74	25.1843	1	9454.41	9.45441	19.6269	33.3861	14.5454	11.7625	44.0501	3.4854	38.5426	13.7962	47.6613	358.186	138.207	0.808677	30.0316	173.568	12.3796	434.742	1189.86	4457.48	2401.04	4223.77	1208.31	14.1441	11.3163	1375.93	8.12102	1.15037	481.76
Med016	1	2	75	25.0284	2	11212.8	11.2127	20.5485	33.885	12.6074	9.78818	36.8078	7.90386	45.1369	14.5151	40.3481	371.222	125.616	0.776387	27.6122	147.991	13.1913	420.012	813.758	2988.94	2192.86	5517.35	1225.85	18.4169	21.2039	222.014	12.1799	1.10677	638.768
Med016	1	2	75	25.2305	3	11526	11.526	20.9366	34.3979	14.8382	12.8496	39.0976	4.95711	40.4792	12.777	46.7438	442.071	128.733	0.865981	27.7603	105.961	10.431	466.615	893.884	3370.51	2030.77	4275.97	939.146	18.3449	19.4562	422.388	10.387	1.52639	572.42
Med017	1	1	76	30.033	1	7983.91	7.98391	19.7284	18.2276	7.17695	5.91689	56.9416	3.14768	35.6452	21.1186	43.2362	285.6	70.4035	0.824429	25.3984	46.5132	6.15212	816.659	593.982	2424.57	2919.41	2388	660.921	21.4803	6.60237	144.293	6.48832	0.887432	245.306
Med017	1	1	76	30.033	2
Med017	1	1	77	30.0759	3	8737.76	8.73776	17.5393	46.3887	9.00239	27.9466	34.2511	0.703945	64.3373	14.9379	20.7249	89.4504	108.397	3.10435	25.1278	301.201	15.9943	492.713	865.131	4892.65	1505.85	2688.37	941.21	10.1522	6.59999	359.354	13.67	1.29108	339.429
Med018	2	2	66	20.2989	1	9594.42	9.59442	17.4699	40.3021	12.2447	17.9993	37.1047	3.25267	47.9031	19.5089	32.5879	211.143	101.307	1.46997	31.9055	99.0481	25.656	363.699	586.458	1626.84	2086.95	3604.98	1175.26	11.8294	10.8946	1001.06	16.9644	0.972727	527.603
Med018	2	2	66	20.0196	2	7753.88	7.75388	20.5772	31.0007	9.14077	10.9018	47.7445	0.0162069	48.8046	19.6781	31.5173	183.259	87.9184	1.19265	25.6885	91.3172	14.4177	326.219	656.258	3130.21	2106.21	3258.78	965.055	10.4975	9.68427	57.861	11.0018	0.823904	443.656
Med018	2	2	67	19.4243	3	7928.8	7.9288	15.7029	34.7926	12.041	14.8072	47.1376	1.05392	46.1392	16.3411	37.5197	161.177	86.3202	1.22973	35.6739	135.204	8.97801	371.653	935.823	4733.41	2289.94	3744.36	1096.4	14.1732	10.5265	369.75	9.76974	1.20197	432.377
Med019	1	1	73	30.013	1	13485.8	13.4858	18.6153	42.2722	16.6308	17.459	39.2387	0	44.3237	13.4552	42.2211	438.838	175.138	1.0498	33.4571	96.1695	16.6413	1140.03	1417.58	3911.48	3971.18	5237.66	2280.92	18.2088	19.8676		14.7522	1.95386	649.017
Med019	1	1	74	30.451	2	12541.5	12.5415	14.4639	38.1141	10.6924	19.8506	46.5097	0	55.5206	14.5736	29.9058	324.261	210.893	1.85651	45.0733	104.976	17.9854	507.214	1815.42	9168.78	4061.75	4956.47	1526.85	15.5763	13.2957	100.398	15.8478	1.57658	546.408
Med019	1	1	74	31.1609	3	13464.5	13.4645	16.2655	40.5982	10.6326	18.8291	42.1471	0	49.5309	22.4995	27.9696	211.912	210.433	1.77088	48.5544	275.236	24.9672	904.982	1032.67	2879.6	3477.7	4905.98	1890.18	21.5965	15.7967	648.33	27.2842	3.2664	599.492
Med020	2	2	65	28.9673	1	8051.38	8.05138	23.1171	28.1543	12.6776	9.50199	40.1381	6.73189	36.9669	13.7115	49.3216	345.593	83.3969	0.749509	28.2694	119.073	9.0467	423.566	1140.74	4737.49	1765.68	3624.34	894.179	11.8577	14.3184	124.802	6.73104	0.863975	454.703
Med020	2	2	65	29.1884	2	6581.27	6.58127	21.9428	32.2107	10.4627	19.5532	37.0959	7.47289	45.0776	18.2026	36.7199	479.434	50.786	1.86884	21.9002	72.5685	7.63197	1104.86		2497.72	1479.23	2979.56	499.157	19.0568	12.249	1497.49	6.26483	1.45746	336.767
Med020	2	2	65	28.9831	3	6694.68	6.69468	22.0732	32.559	12.4676	12.0472	40.2154	3.50963	41.1604	16.2429	42.5967	285.283	77.3587	0.966281	19.8318	143.946	6.93835	427.154	552.544	1753.01	2671.67	2862.31	915.629	10.2594	29.7014	250.503	6.94519	1.6469	362.1
Med021	1	1	65	22.051	1	12204.9	12.2049	18.8517	47.8552	6.89884	27.7124	31.9642	0.868084	61.8917	22.7007	15.4076	321.768	99.3792	4.01696	50.4271	74.2726	52.1891	493.102	444.396	2167.99	2198.62	5102.22	1092.39	22.674	15.9819	1671.55	30.4517	0.98155	861.878
Med021	1	1	65	22.0763	2	10072.1	10.0721	22.0458	36.72	9.08234	18.5099	40.4596	0	54.0586	19.4162	26.5252	284.453	121.386	2.038	39.0521	206.066	23.313	609.563	1905.48	2793.36	1856.64	4188.35	1397.15	15.9571	13.4581	1512.28	14.7542	1.4243	484.335
Med021	1	1	65	22.2476	3	10852.4	10.8524	17.8055	39.6282	7.67676	21.8772	41.8894	0	59.3781	19.786	20.8359	296.934	122.255	2.8498	37.4092	134.052	22.0714	294.398	1275.07	7291.39	2123.44	4461.45	902.268	16.6468	11.1176	1735.65	17.4896	1.71595	438.636
Med022	1	1	71	28.8683	1	10255.9	10.2559	18.3679	31.1406	12.533	11.6993	45.7079	5.00617	41.6401	13.7523	44.6076	480.494	179.927	0.933476	24.3504	222.401	10.7484	450.12	1029.32	4682.27	2148.5	4607.68	1594.91	17.7861	29.9331	1836.19	7.43744	1.10412	561.098
Med022	1	1	71	28.0863	2	10033.8	10.0338	15.3738	38.6104	8.62128	21.426	37.9486	6.72988	59.543	16.4984	23.9586	291.584	109.928	2.48525	29.0058	233.602	16.8191	441.537	1027.55	4306.65	1857.48	3895.52	780.995	11.7787	10.1989	138.44	14.1525	1.62158	542.722
Med022	1	1	71	28.031	3	9553.74	9.55374	20.9887	33.5806	9.52378	15.6638	40.7651	3.5093	50.7305	18.4248	30.8447	405.658	112.367	1.64471	23.9104	209.409	13.5327	448.429	963.786	5040.38	2019.46	3691.19	875.018	16.0755	13.8847	440.344	12.4391	1.50377	567.894
Med023	1	2	68	22.2771	1	7511.89	7.51189	14.2089	20.4278	7.22865	8.24293	33.4194		43.0536	19.1905	37.7559	103.183	86.7388	1.14031	23.1338	205.281	3.66637	333.914	644.529	3670.17	1354.72	3423.46	430.701	9.00886	8.26262	286.717	6.57507	0.457544	326.287
Med023	1	2	69	22.348	2	12516.2	12.5162	18.3348	31.6511	14.726	0	31.4433		35.7387	13.0734	51.1879	334.32	142.344	0	31.9257	421.467	11.1514	563.559	1211.16	4162.31	2511.1	4860.11	1439.03	13.325	12.4592		8.63386	0.935699	572.544
Med023	1	2	69	22.419	3	5801.37	5.80137	21.1648	36.1263	16.9004	11.247	36.5074	5.3022	34.2928	14.1765	51.5306	233.234	57.4085	0.665484	14.8005	79.8833	5.51157	183.029	7268.17	1462.23	1706.64	2005.92	677.103	12.0566	8.23515	148.156	6.44763	0.707467	242.161
Med024	2	2	76	34.9632	1	9668.7	9.6687	26.1786	33.8191	16.5259	11.5731	39.773	0	37.2077	9.66124	53.1311	422.514	115.337	0.700301	22.6097	91.6291	5.6661	736.355	3556.17	4416.7	3036.03	5442.18	1908.42	14.0654	18.5546	158.218	6.36541	1.104	756.508
Med024	2	2	76		2
Med024	2	2	76		3
Med025	1	2	68	34.3212	1	7135.18	7.13518	18.8013	27.6193	8.76127	11.2104	47.9237	4.57638	44.0297	21.5597	34.4106	133.43	74.6374	1.27954	31.9401	108.439	7.03011	321.073	277.724	782.601	1783.88	2955.82	722.774	12.2922	8.71294	164.532	9.07919	1.24197	352.446
Med025	1	2	68	33.8276	2	10794.8	10.7948	17.8295	40.1892	9.08677	7.64064	34.2479	4.74837	52.1273	23.8418	24.0309	200.613	76.483	0.840853	36.6973	103.407	37.68	475.488	1002.84	4945.85	3050.99	4020.39	1264.8	26.1997	22.4416	95.1746	25.1777	0.903836	657.418
Med025	1	2	69	33.8722	3	8213.65	8.21365	20.9575	33.1098	8.29863	15.1731	31.2572	12.3702	49.7828	22.9894	27.2278	542.248	48.3329	1.82838	25.8646	70.867	11.0927	469.872	470.449	530.006	1767.61	2600.11	351.343	12.5802	13.5663	321.205	13.4078	1.29246	371.855
Med027	2	2	67	19.3092	1	8156.38	8.15638	14.3104	29.3872	12.9869	9.68767	50.756	5.25645	34.9631	18.167	46.8699	107.016	139.143	0.74596	27.7222	245.059	10.458	469.555	1098.22	4746.33	2001.25	3747.26	1342.78	11.6719	9.51683	33.7091	8.36247	1.9986	467.074
Med027	2	2	67	18.5219	2	8469.97	8.46997	18.6651	28.6533	13.0414	11.3139	45.5451	6.14652	36.9041	13.6719	49.424	211.048	97.5336	0.867542	27.0469	190.138	6.4069	406.443	630.061	1605.66	2678.84	4605.02	1204.87	13.3486	11.8808	165.067	6.28635	1.65092	470.835
Med027	2	2	67	19.1703	3	7409.39	7.40939	19.984	25.8477	10.9305	9.55634	50.0155	3.29555	39.3446	15.6534	45.002	142.165	91.7042	0.874285	21.6287	162.889	7.26618	828.212	923.539	4889.37	1992.05	3476.64	1297.44	10.097	12.9101	75.4519	6.39446	0.946822	440.75
Med028	1	1	72	27.2508	1	11103.8	11.1038	22.2714	40.8148	11.5733	18.7513	27.8667	7.82514	48.6458	21.33	30.0242	337.015	72.7164	1.62022	37.8047	191	15.742	513.924	733.079	2945.04	5420.03	5186.31	663.739	16.9392	18.8009	416.001	22.15	1.61676	654.58
Med028	1	1	72	27.1811	2	11489.1	11.4891	18.7651	38.0876	9.42807	20.4694	36.7707	4.79789	57.0577	16.6619	26.2804	316.507	152.049	2.17111	42.2974	151.857	19.4312	698.771	865.88	3551.62	2674.15	4746.34	1723.21	15.0994	15.3697	429.479	16.8428	1.20156	714.616
Med028	1	1	72	27.2613	3	11534.2	11.5342	20.9925	40.7217	10.045	19.8126	31.3349	5.30671	52.2365	21.2795	26.484	453.95	99.4612	1.97238	40.8991	121.009	21.4472	569.076	563.843	1257.11	2703.17	4732.68	1191.95	18.0544	17.1462	497.275	21.8602	2.58793	524.152
Med029	2	1	67	17.9716	1	13550	13.55	20.7811	41.7152	17.0119	15.9126	25.311	8.60254	41.2573	14.6353	44.1074	703.173	118.992	0.935381	37.4546	99.9887	15.0912	505.452	1748.33	6921.68	4061.78	5179.94	1768.35	16.0926	19.1911	695.53	18.3588	1.10705	872.343
Med029	2	1	67	17.9716	2	11431.7	11.4317	23.3529	36.9397	10.3076	18.7257	32.1347	5.89351	53.6873	16.7603	29.5523	422.633	142.937	1.81669	38.4827	191.068	18.1633	636.795	971.657	3468.93	3062.87	5026.44	1770.89	14.1042	15.4883	785.54	15.891	1.28592	779.37
Med029	2	1	67	18.2063	3	9292.41	9.29241	21.355	41.3627	9.52793	20.3525	29.0526	6.58695	52.8772	22.3686	24.7542	317.264	85.9673	2.13609	30.6358	172.038	18.0904	447.651	427.071	1247.95	2147.91	3890.46	1030.94	13.7407	12.591	753.449	18.7096	2.00515	441.777
Med030	2	2	77	24.9922	1	8661.32	8.66132	23.8235	34.9595	8.5001	15.725	38.6697	0	49.5215	23.7098	26.7687	393.419	111.186	1.84997	45.4481	310.477	14.0074	548.789	1676.05	8825.18	4181.17	4796.91	985.866	15.4507	12.8007	1980.61	13.5799	1.61001	478.194
Med030	2	2	77	25.3191	2	6862.44	6.86244	21.3725	30.5908	7.28989	21.4246	46.3665	0.0399363	50.3534	23.3601	26.2865	265.663	101.579	2.93895	30.7903	151.604	11.7521	298.721	1197.53	5834.71	1526.4	3630.36	887.361	9.74143	7.99606	1342.25	8.68253	1.88728	384.92
Med030	2	2	77	25.2595	3	7072.29	7.07229	21.7321	27.5637	6.77239	11.1174	49.1294	0.0430464	44.9197	27.7166	27.3637	189.356	102.804	1.64158	33.3737	183.334	10.2934	336.681	2022.85	11583	2725.2	3810.21	884.321	11.203	9.85168	293.296	11.5399	1.06208	354.678
Med031	2	1	65	32.7613	1	9032.17	9.03217	20.14	26.13	11.6	9.05	45.13	121	38.32	12.57	49.12	352.43	149.66	0.21	24.9	114.45	9.45	443.11	2022.73	7029.18	2868.89	4121.52	1000.92	14.5	14.37	105.3	5.95	1.25	410.32
Med031	2	1	65	32.4823	2	7656.8	7.6568	21.5	43.2	10.5	22.47	34.2	0	56.3	17.4	26.3	205.8	63	2.14	31.9	128	16.2	477.4	1270.8	6766.4	1611.2	3625.6	742.7	13	11.2	1181.2	11.9	1.5	383.2
Med031	2	1	65	32.841	3	8874.6	8.8746	19.4	44.1	9.8	21.7	35.2	0	53.5	22.4	24.1	197.7	91.6	2.22	28	96.6	16.4	368.9	1664.4	8390.4	1523.5	3113.1	738.5	12	9.1	1472.1	17.7	2.7	375
Med032	2	1	74	21.456	1	11127.6	11.1276	18.1335	41.9434	11.3518	19.8112	38.6278	0	50.458	20.6297	28.9123	289.107	180.877	1.74521	35.4395	97.5808	11.9991	337.774	1656.34	8626.79	1481.18	4782.46	1288.02	16.1048	21.854	165.071	22.1006	1.64333	682.656
Med032	2	1	74		2
Med032	2	1	74		3
Med033	1	2	65	25.493	1	8270.22	8.27022	25.8503	29.3037	12.4768	10.2724	46.9761	0	38.5198	14.6944	46.7858	469.567	141.643	0.823323	14.0344	210.622	6.39221	401.07	873.959	899.712	1269.2	3795.75	978.559	15.7874	9.96731	136.011	7.35992	1.18178	376.162
Med033	1	2	66	25.3347	2	9594.41	9.59441	20.1176	43.514	20.8677	11.8518	36.0771	0	37.974	10.3145	51.7114	436.611	118.882	0.56795	16.3456	54.8954	7.55371	260.841	682.441	1019.24	1962.83	3469.68	1182.39	11.3391	11.3396	68.8866	9.28256	1.17624	317.814
Med033	1	2	66	25.5506	3	8637.5	8.6375	27.3505	29.7099	12.2584	11.1766	42.5403	0	41.7983	12.3578	45.8439	418.911	73.6714	0.911752	19.3214	78.6862	7.58339	306.643	592.602	1505.45	2167.42	3764.67	882.905	12.4431	10.1394	455.226	6.20232	0.975876	347.798
Med034	2	1	69	24.9499	1	8119.8	8.1198	24.9466	35.8235	12.3437	12.6367	36.222	5.65728	38.9704	22.9627	38.0668	343.738	58.7141	1.02374	32.5905	158.214	12.4522	537.016	2982.57	18565.5	1666.11	4235.52	614.83	16.1289	11.2185	720.826	13.817	1.8776	483.539
Med034	2	1	69	25.6539	2	8365.43	8.36543	21.8665	42.6806	14.3584	18.4211	29.6934	4.39294	46.8202	16.6855	36.4943	272.747	58.1286	1.28295	23.682	115.286	12.7589	293.983	768.811	3483.64	1743.82	3816.01	662.323	14.9394	16.0212	722.135	12.2232	1.65837	435.62
Med034	2	1	69	25.4302	3	7292.06	7.29206	23.9377	49.4339	11.3055	26.5524	22.1188	3.24517	58.7443	16.2436	25.0121	265.723	36.5714	2.34863	25.0682	120.639	17.8572	671.189	485.212	2423.12	1353.55	3105.78	511.587	13.7845	8.01799		9.96518	0.941946	335.365
Med035	1	1	68	29.0673	1	14995	14.995	16.8054	44.281	14.8486	18.4182	31.7803	6.69273	44.2408	20.0928	35.6664	388.677	143.76	1.2404	42.3421	91.3971	25.2791	866.502	1523.55	6299.46	4071.73	5669.52	1482.84	23.8843	20.5224	96.758	32.1652	1.36248	921.137
Med035	1	1	68	28.7353	2	10572.3	10.5723	20.3764	35.1336	8.31064	17.5275	36.9705	6.84366	53.6217	20.9536	25.4247	189.042	121.269	2.10904	37.429	213.259	21.5765	646.438	429.021	2156.4	1602.35	5106.75	1307.76	21.6744		1381.85	16.9508	0.863689	686.7
Med035	1	1	68	28.5696	3	13559.1	13.5591	16.2873	42.4751	9.51915	23.3947	34.7663	5.44791	58.6529	17.4817	23.8655	177.252	167.692	2.45765	36.1504	162.964	34.6666	403.341	1443.14	8005.88	2563.02	5034.27	1478.28	17.2058	12.4886	1082.17	22.405	1.78298	589.098
Med036	1	2	70	27.9786	1	8714.69	8.71469	18.968	46.0343	22.0701	17.1875	32.2446	2.81125	39.984	8.67322	51.3427	289.438	77.501	0.778767	23.1033	72.9215	5.09863	260.004	1007.48	4411.54	3368.88	2472.57	953.311	8.19603	9.13706	132.657	7.68417	1.21408	320.373
Med036	1	2	70	27.7556	2	8376.56	8.37656	21.0195	39.847	18.2132	13.4677	36.6004	1.3637	36.8992	13.5938	49.507	269.866	73.3658	0.739446	32.1478	71.2122	8.19632	308.256	910.394	3856.35	3388.45	2774.47	1072.29	12.0443	12.575	143.74	10.0208	1.28294	398.547
Med036	1	2	70	27.4267	3	6234.75	6.23475	20.9419	37.2533	10.3565	16.5341	38.2492	2.9471	48.8852	20.4944	30.6204	115.437	51.9498	1.59649	25.339	47.3089	13.3404	232.463	242.393	978.665	1942.45	2270.89	553.305	11.0311	9.28331	59.1958	11.0411	0.846985	315.784
Med037	2	2	66	24.6652	1	7957.35	7.95735	16.8341	34.3103	15.3743	9.55904	47.5336	0	30.7374	19.8261	49.4365	176.681	151.32	0.621756	30.8605	78.3005	8.8504	405.956	952.562	2844.69	2172.14	3780.24	1260.1	8.73102	9.83901	156.102	11.2081	2.34412	477.739
Med037	2	2	66	24.0215	2	8175.78	8.17578	14.8115	39.1624	17.5478	10.971	44.1563	0	38.2733	13.0538	48.6729	325.554	146.25	0.625207	29.0493	118.354	14.5764	370.245	956.651	2791.26	1506.24	3480.38	962.351	8.18232	8.49663	165.177	8.3901	1.86598	445.278
Med037	2	2	67	24.1009	3	8298.45	8.29845	14.7059	41.5512	19.6491	14.341	39.6489	2.01836	37.4413	11.2592	51.2996	462.225	143.963	0.729855	33.3687	146.35	11.8885	340.516	1604.33	5834.81	1533.46	3609.93	1100.07	8.09877	8.52567	114.765	8.0206	1.40025	375.389
Med038	2	1	65	24.4514	1	6884.3	6.8843	21.2729	28.061	9.4188	12.0979	45.1096	4.91606	46.7394	16.8718	36.3888	247.974	103.225	1.28444	22.9952	120.056	8.93321	263.369	804.591	3722.37	2457.4	3561.51	1333.76	9.69053	12.8183	156.997	6.77764	0.756957	456.888
Med038	2	1	65	24.4514	2	8129.67	8.12967	18.8852	45.5758	10.3481	23.3376	33.5565	1.13008	54.9378	20.7024	24.3598	116.547	95.1605	2.25526	32.8176	180.969	17.6906	437.786	1182.07	6830.67	1775.98	4291.79	923.569	12.0786	9.96106	1283.7	17.4793	0.729693	489.421
Med038	2	1	65	24.5212	3	8658.59	8.65859	20.3846	33.2942	6.71157	16.7172	40.8527	4.42104	54.3443	23.8377	21.818	128.076	134.746	2.4908	33.154	139.583	16.82	410.567	968.993	5448.34	1387.72	4352.21	1132.04	11.978	8.74728	426.038	15.5172	1.44755	503.41
Med039	1	1	66	26.7803	1	9196.94	9.19694	15.9259	41.6865	11.5872	19.0321	40.34	0	50.2254	19.1961	30.5786	202.473	102.263	1.6425	34.2477	127.713	14.4799	751.199	597.29	2627.91	2041.15	3939.01	675.029	13.7947	11.4996	195.744	17.0824	1.79325	551.968
Med039	1	1	66	26.1983	2	10835	10.835	16.6579	34.7688	9.48692	16.4527	47.3573	0	51.4675	18.8556	29.677	110.674	112.756	1.73426	47.1846	229.684	16.5077	646.787	440.998	1706.83	2476.56	4164.97	1263.17	18.1137	13.2195	572.428	16.158	1.74704	565.738
Med039	1	1	66	26.532	3	8805.07	8.80507	18.9854	36.3119	8.22132	17.8804	43.1679	0	53.2274	22.2989	24.4737	104.336	97.9413	2.17489	41.8954	180.55	17.5391	429.377	1388.78	7720.1	1739.9	3852.35	1020.91	14.0287	13.5415	460.396	15.3717	2.46142	425.399
Med040	1	1	76	25.0173	1	12852.2	12.8522	20.2801	38.3908	13.7984	12.8755	40.0611	0	36.9534	23.4443	39.6022	347.841	117.669	0.933115	46.2199	145.873	15.2452	506.467	1192.74	4284.19	2482.93	4792.68	1670.78	21.0103	19.7276	1728.4	24.3996	2.18141	724.418
Med040	1	1	76	24.2336	2	11526.1	11.5261	19.4936	34.2235	8.62399	15.6086	42.6682	0	51.054	20.7378	28.2081	154.916	148.052	1.8099	44.1238	258.213	15.0983	663.848	604.97	2831.99	2311.52	4417.05	1378.37	19.8432	15.5523	194.355	18.0586	2.19921	578.741
Med040	1	1	76	24.4839	3	10295.6	10.2956	19.1739	44.1232	9.40307	23.7347	35.5383	0	57.5382	19.6667	22.7951	162.521	109.931	2.52414	36.2013	43.9814	20.252	479.727	760.566	3396.22	1861.26	3360.14	1155.48	12.0802	9.43729	234.113	20.8485	1.95405	454.26
Med043	1	1	69	29.8404	1	9828.6	9.8286	16.4097	35.7479	11.9549	16.6272	46.1324	2.32337	50.4388	13.2959	36.2653	332.798	131.9	1.39083	35.1904	107.509	14.1045	453.189	1164.09	5474.88	3163.95	3833.52	1053.82	17.2168	11.4335	84.7517	9.96454	1.61664	402.182
Med043	1	1	69	29.694	2	8674.96	8.67496	13.5049	47.3835	8.45224	28.0494	37.398	0.7819	62.9036	18.1414	18.955	165.738	109.503	3.31858	34.6466	188.494	21.9367	431.491	1546.75	9727.87	1257.66	3606.47	485.212	13.3935	9.31749	153.72	17.59	1.15278	434.806
Med043	1	1	69	29.7552	3	7404.53	7.40453	16.1437	48.3981	10.9453	25.532	33.4133	1.24075	56.7369	18.9405	24.3226	271.395	75.8116	2.33268	27.7796	113.478	19.7783	386.717	601.931	2441.74	1288.84	2601.39	529.132	12.7024	7.77159	1350.52	13.8953	1.60394	343.412
Med044	2	1	67	29.8624	1	10723	10.723	18.1443	36.7002	13.8054	15.2684	42.2685	2.17003	45.1011	14.1194	40.7796	402.006	134.471	1.10597	34.8567	156.012	13.7969	638.202	1309.06	5564.97	3200.65	4127.42	1507.24	15.3283	13.9625	123.034	11.7521	2.10873	452.152
Med044	2	1	67	29.0551	2	9697.93	9.69793	18.9281	41.4887	9.57937	23.0096	35.8688	1.91822	59.1782	16.1848	24.637	369.681	113.47	2.402	37.7886	178.264	19.9702	526.665	1678.95	9866.05	1916.37	4505.31	981.499	13.357	12.5449	178.79	14.8936	1.25526	467.041
Med044	2	1	68	29.4597	3	7903.05	7.90304	19.8871	42.2208	9.19681	19.5888	33.7965	2.32498	50.2789	26.1155	23.6056	235.357	78.3991	2.12995	29.1914	82.1791	18.1328	462.007	647.164	2694.62	1682.58	2676.43	851.779	11.0721	8.3762	1344.02	18.2907	1.98549	317.397
Med045	1	1	68	24.6182	1	6763.32	6.76332	17.9951	33.371	14.4193	11.8703	46.7426	1.29893	38.6568	14.3853	46.9579	181.545	122.21	0.823224	21.1259	78.9687	6.36842	670.934	908.417	3508.1	1433.8	3206.81	661.848	12.4089	13.3006	226.622	6.7161	0.81533	350.416
Med045	1	1	68	24.5469	2
Med045	1	1	68		3
Med046	1	1	67	28.6108	1	12147.9	12.1479	18.8378	34.9988	14.3055	12.69	43.5471	1.43462	39.8663	15.1921	44.9416	834.637	154.161	0.887069	38.9902	194.836	13.3658	488.2	1197.77	2912.9	3257.29	4945.48	1362.69	17.5054	19.1253	468.365	12.7919	2.4077	573.296
Med046	1	1	67	28.1867	2	12854.1	12.8541	16.6197	44.2152	8.76114	26.7902	36.3837	1.71462	64.3864	14.5574	21.0561	164.163	152.349	3.05785	49.0401	294.13	23.3093	549.409	1726.29	10386.7	1761.86	5397.71	812.62	14.359	13.0217	545.401	19.2011	1.38519	588.028
Med046	1	1	67	28.0928	3	10039.3	10.0393	20.9556	34.6578	6.08557	20.5401	40.8971	1.94517	63.3273	17.9102	18.7625	164.514	109.044	3.37521	47.4362	225.666	14.6687	465.435	898.455	5648.43	1540.55	4953.78	928.528	14.8384	11.6045	272.05	14.289	1.18915	562.809
Med047	2	2	72	26.7165	1	6980.77	6.98077	20.7671	38.3682	13.9774	15.8575	33.1797	6.19985	44.3322	16.5917	39.0761	227.305	73.3841	1.13451	24.234	125.558	10.6466	310.016	1005.04	5273.24	1377.16	3576.66	483.728	13.156	13.846	135.628	10.3713	0.570913	377.914
Med047	2	2	73	26.358	2	7176.02	7.17602	16.6596	32.5296	13.0396	17.0435	39.9552	10.1213	41.4947	15.2174	43.2879	262.03	80.3669	1.30705	19.4836	122.103	7.598	173.509	778.926	3540.7	1444.36	3279.64	395.822	11.986	11.3281	189.941	7.73565	0.720813	295.232
Med047	2	2	73	26.2074	3	5623.54	5.62354	21.7983	37.1143	17.702	12.5327	34.0874	6.40331	36.4154	12.1492	51.4353	305.937	53.4616	0.707984	16.9842	37.9834	5.90304	179.833	834.687	3001.77	1780.8	2163.06	478.848	7.92858	9.33701	117.813	5.11913	0.809469	221.287
Med048	1	2	65	29.7884	1	6536.36	6.53636	20.6747	33.2474	9.53437	15.2595	37.4769	9.37035	49.3974	19.7384	30.8643	276.156	32.7347	1.60047	14.5093	30.9697	12.6066	197.178	323.951	884.65	1977.61	1963.33	434.998	7.83407	7.45388	331.343	9.61491	0.665311	280.099
Med048	1	2	66	30.1659	2	8110.89	8.11088	21.4733	32.3984	6.38517	22.5498	37.173	7.33187	50.7365	27.7793	21.4842	528.607	57.7804	3.53158	25.4987	79.1553	15.9982	265.594	803.796	4239.17	2169.73	3314.35	363.389	12.413	12.4688	320.389	15.4478	1.86071	367.969
Med048	1	2	66	30.0151	3	4893.13	4.89313	25.9986	31.0675	9.57528	13.7359	33.7469	7.96723	48.1545	18.2769	33.5686	171.21	42.3144	1.43451	14.0605	25.6188	7.86534	195.966	262.232	1224.47	1361.2	1973.53	291.581	7.90126	9.51068	314.002	5.98721	0.672054	245.987
Med049	1	2	66	24.403	1	8601.12	8.60112	19.0539	25.1615	9.28505	9.17236	45.5784	7.96857	39.8344	19.8418	40.3238	229.831	133.117	0.987864	22.722	144.159	7.50726	323.927	1144.62	2536.55	1571.34	3908.32	788.444	21.8064	13.9909	552.921	8.28837	1.46061	422.863
Med049	1	2	66	24.363	2	12526.7	12.5267	19.7328	36.9369	13.6975	5.01641	41.635	0.752541	42.4311	17.7625	39.8065	405.076	169.869	0.366227	36.4801	103.071	8.82686	449.421	1100.81	1074.97	3411.82	4697.43	1364.27	23.0093	20.7588	330.519	16.8479	3.06169	551.838
Med049	1	2	66	23.7753	3	10628.9	10.6288	17.8181	32.2749	12.6883	11.7632	43.4277	4.64544	39.5814	17.7247	42.6939	245.181	161.761	0.927096	32.859	173.636	9.19721	323.968	1048.79	3941.96	2546.84	3826.51	868.86	15.0653	18.7824	140.461	13.3047	1.56203	447.205
Med050	2	2	70	24.9968	1	7069.19	7.06919	19.1471	33.2612	11.1585	11.7795	45.4811	0	38.627	24.7825	36.5905	170.425	126.151	1.05565	31.1759	119.493	7.66638	434.601	593.425	3069.98	2252.7	3731.4	981.963	11.225	11.6804	261.282	12.2822	1.72746	361.589
Med050	2	2	70	24.8522	2	6944.41	6.94441	19.8212	27.6882	9.38628	8.66179	51.0118	0	36.2015	26.2472	37.5513	265.772	124.003	0.922814	25.5993	103.979	8.62873	389.17	947.757	4659.91	2073.78	3370.13	879.696	10.8715	10.5534	477.063	10.472	1.38266	339.462
Med050	2	2	70	24.8802	3	8522.76	8.52276	19.3621	36.6196	8.2748	17.9984	42.8832	0.0428734	52.6519	23.1411	24.2069	119.327	117.637	2.17508	39.2895	242.104	19.4873	579.775	1396.09	8046.19	2549.13	4372.77	856.877	13.0768	10.6266	127.748	17.0191	1.10789	496.846
Med051	2	2	72	42.625	1	8639.06	8.63906	17.468	38.3741	16.4225	13.5081	45.4144	0.42538	38.4009	14.9131	46.686	464.039	105.88	0.822535	17.483	56.1781	9.10258	446.636	790.329	1754.75	3140.02	3149.92	735.993	11.8217	9.31075	361.734	10.2549	1.49573	322.648
Med051	2	2	71	42.4049	2	5424.22	5.42422	21.003	36.89	17.9172	17.3594	40.4892	0	33.0272	13.6103	53.3626	235.214	65.9113	0.968869	15.315	110.884	5.96556	261.883	924.831	3670.43	2164.8	2623.36	754.585	7.9364	7.52349	146.948	5.82808	0.755325	231.224
Med051	2	2	71	41.5396	3	7437.42	7.43742	20.2443	35.0395	13.9418	13.3773	42.6618	1.25944	41.5964	15.0518	43.3518	238.198	62.4109	0.959508	25.4483	88.871	7.80734	563.633	1081.98	4413.84	2362.8	3423.45	928.246	10.4951	9.39483	259.747	8.18685	1.2602	315.046
Med053	2	2	66	32.5513	1	7100.44	7.10044	25.7926	28.9336	13.4669	8.55594	45.1255	0	32.3916	16.6245	50.9839	506.281	64.9477	0.63533	15.514	132.13	8.71703	187.174	430.637	540.091	2421.37	2827.45	884.6	10.7568	7.77933	486.046	5.84206	1.67202	289.318
Med053	2	2	66	32.4682	2	9039.23	9.03923	21.5372	30.345	13.7854	11.1696	47.2404	0	37.7647	12.2591	49.9762	588.561	156.448	0.810249	24.1404	177.88	9.62336	348.582	1589.52	7199.17	2569.24	4089.76	733.388	10.7553	11.0917	790.885	6.28083	0.762019	406.335
Med053	2	2	67	32.1898	3	8657.71	8.65771	20.2868	32.5446	16.3153	11.1293	40.2562	5.97907	36.5386	9.89653	53.5648	425.553	104.077	0.682139	21.4148	180.277	7.45907	321.28	1877.32	9185.77	1486.19	3774.07	1034.02	13.5642	14.1508	160.323	4.24903	0.880381	407.642
Med054	2	1	66	35.5566	1	7999.09	7.99909	25.3517	34.1714	12.8205	13.4698	31.0156	8.846	43.9965	14.1276	41.8759	361.437	75.4013	1.05064	16.5816	145.06	10.0609	418.202	1103.97	5392.85	1739.51	3167.98	702.387	13.9371	12.6753		5.49796	1.06296	300.004
Med054	2	1	66	35.2212	2	6260.87	6.26087	26.599	38.0641	12.8146	14.3291	34.1809	0.016675	41.3516	21.6674	36.981	339.998	70.4693	1.11818	21.5638	156.384	13.0718	369.204	1160.95	5638.13	2022.92	3564.16	742.649	11.0735	9.05711	2313.32	8.82198	1.25249	291.186
Med054	2	1	66	35.219	3	11390.1	11.3901	23.2344	43.4294	12.8218	17.9784	32.5112	0.00401006	44.0543	24.5273	31.4185	289.58	120.917	1.40218	46.8454	220.058	23.4327	629.23	1173.2	5986.68	2666.18	5224.17	1186.46	18.4212	14.7379	284.967	27.6964	2.84442	565.068
Med056	2	2	77	25.0386	1	10421.8	10.4218	20.6487	34.5525	12.6331	14.1303	40.6285	5.88026	44.2541	16.1809	39.565	391.753	122.608	1.11852	26.4522	104.677	14.8676	368.128	616.693	1239.46	2577.09	4277.11	867.352	13.6657	13.0111	121.921	11.9629	2.26998	445.616
Med056	2	2	77	23.8798	2	7378.06	7.37806	19.9052	32.7744	11.1441	12.3061	34.8912	8.30137	47.824	13.2299	38.9461	210.743	88.7585	1.10427	24.2865	166.826	12.668	252.791	955.832	4720.67	2808.71	3691.28	748.072	11.1792	15.2129	130.538	6.78459	0.594294	352.674
Med056	2	2	77	23.9685	3	7409.68	7.40968	23.717	32.5458	10.1807	15.0823	35.6347	6.93036	50.111	16.0637	33.8253	219.568	100.738	1.48146	20.2463	193.543	13.2879	333.992	710.993	3164.2	1291.74	4012.17	649.436	11.1058	14.5746	132.898	8.96653	0.631034	391.892
Med059	2	1	70	24.8482	1	9493.62	9.49362	18.2314	20.4759	6.5927	8.408	57.9456	0	45.4462	18.9195	35.6343	132.638	185.289	1.27535	50.8256	377.37	12.8365	598.565	2642.38	15018.1	3192.53	6651.32	1309.5	17.2806	16.7254	35.56	6.88147	1.9855	530.413
Med059	2	1	70	24.9289	2	6729.65	6.72965	20.1503	35.5276	7.52468	19.1283	38.6857	4.09555	59.3586	17.2909	23.3505	85.1113	75.4854	2.54207	36.0736	235.197	16.4729	573.292	930.656	5065.63	1907.7	3702.63	866.254	11.4437	9.23121	801.545	8.78289	0.981811	328.973
Med059	2	1	71	25.0658	3	7092.2	7.0922	21.4256	36.3411	7.93957	18.9613	37.6874	3.88619	57.0908	19.0038	23.9054	184.228	62.8058	2.3882	22.0596	159.938	16.3196	426.924	3112.4	19806.2	1379.9	3142.33	735.308	9.75123	8.94652	1627.6	9.31097	1.20357	336.779
Med060	2	1	65	29.5455	1	8572.26	8.57226	18.0643	34.9092	15.3899	12.6973	44.4244	3.49989	39.3354	12.9876	47.6771	335.33	97.7476	0.825037	23.9475	78.0729	8.90399	283.959	1122.22	4702.87	2981.25	3121.25	647.055	15.7106	12.101	89.52	7.90955	1.11278	392.908
Med060	2	1	66	28.7712	2	9098.31	9.09831	16.504	31.3364	8.12617	14.9659	50.1821	1.00977	52.1877	19.4755	28.3368	126.637	106.971	1.84169	53.4225	220.274	17.1654	543.86	974.132	5428.68	2654.66	4360.99	685.283	21.5491	14.6579	1953.8	9.89504	1.49536	475.862
Med060	2	1	66	28.6179	3	7505.08	7.50508	19.9222	32.0002	8.47982	14.277	45.3145	1.22413	48.1888	23.1894	28.6218	225.617	111.553	1.68364	30.0802	148.042	9.58384	341.063	1062.75	5399.69	1174.57	3482.09	679.481	12.4674	12.2697	99.8395	12.1969	1.47446	322.2
Med061	1	2	70	29.7531	1	10913.8	10.9138	25.139	45.342	17.234	18.7998	28.9699	0.994	45	13.727	41.273	607.482	67.473	1.09029	20.117	74.489	12.987	1009.17	894.196	2581.97	4571.55	4146.8	727.152	15.924	25.833	415.35	13.886	2.184	390.961
Med061	1	2	70	29.537	2	7104.28	7.10428	18.4084	34.7869	16.8048	8.56639	41.0391	4.67054	39.0662	9.56576	51.368	168.984	80.5262	0.509759	17.9015	19.0958	2.37515	563.412	296.009	319.3	2230.76	2253.94	886.709	7.6305	8.58744	207.683	5.28274	0.576183	308.971
Med061	1	2	70	28.9146	3	5875.39	5.87539	23.4239	38.1052	14.3163	15.1885	38.1967	0	43.4385	15.6174	40.9441	291.817	47.354	1.06092	10.7421	60.2068	8.06265	209.085	645.492	874.974	1221	2194.76	671.514	11.7304	14.8885	190.939	6.65713	1.73345	226.32
Med062	2	1	72	25.4097	1	8050.72	8.05072	12.208	38.9803	8.97656	12.1874	47.297	0	33.1845	42.3737	24.4418	200.869	118.647	1.35769	32.0124	228.11	14.3924	343.163	1019.75	5844.76	2709.23	3538.89	568.736	9.31965	6.8526	38.5723	29.2365	4.30791	261.679
Med062	2	1	72	25.4097	2	8815.58	8.81558	18.5148	42.1065	8.70369	24.92	38.1426	0	61.9746	16.3799	21.6456	123.543	122.705	2.86315	33.203	182.37	18.4646	386.547	1481.01	8963.67	2803.21	3573.24	805.199	12.6564	11.1053	361.04	13.9977	1.11411	363.762
Med062	2	1	72	25.4886	3	10196.9	10.1969	14.1715	48.8148	10.8662	27.1714	35.9991	0	59.3503	16.9147	23.735	241.145	124.177	2.50054	34.8293	313.868	22.0263	339.7	875.078	4572.46	3212.57	4704.7	1144.31	14.6999	9.74972	373.502	18.9384	2.12462	361.479
MED063	2	2	74	22.7384	1	9022.8	9.0228	20.5912	31.0925	12.1098	11.3618	46.6155	0	40.3363	16.6719	42.9918	295.335	156.784	0.938231	28.2267	96.513	9.32857	459.86	2165.93	10651.7	1515.25	4395.57	1530.09	10.007	11.0305	925.497	9.40095	1.12917	424.438
MED063	2	2	74	22.1039	2	7083.1	7.0831	21.1001	25.2823	10.8239	13.419	51.6845	0	38.3422	13.3557	48.3021	177.218	154.462	1.23976	31.3829	129.076	9.43933	376.368	1760.56	8851.71	1617	4031.82	1215.06	9.72847	9.346	124.585	4.89254	0.566623	458.681
MED063	2	2	74	22.042	3	9268.39	9.26839	18.1522	34.3618	14.0375	13.4353	45.3262	0	42.3775	13.3456	44.2769	285.053	161.446	0.957101	34.8654	94.7089	12.9487	342.237	2349.35	12366.9	1675.9	4400.71	1106.81	9.69608	9.74542	1114.03	8.26211	1.05655	416.902
Med064	2	1	76	27.1589	1	6265.34	6.26534	20.4254	30.5809	6.32453	16.2566	43.711	5.13224	57.9546	19.4985	22.5469	127.036	80.1587	2.5704	24.8266	115.568	7.24802	391.691	472.748	1929.33	1378.95	2698.87	810.004	9.35311	8.1597	1787.86	6.87378	0.618696	353.379
Med064	2	1	76	26.8101	2	8959.48	8.95948	17.2859	46.3831	9.73751	25.296	33.6385	2.05083	57.8401	19.8948	22.2651	134.939	85.4288	2.59779	25.7624	118.703	18.983	488.454	294.853	1378.06	1469.12	3088.86	714.429	12.8847	9.24903	276.82	19.5877	1.34721	425.252
Med064	2	1	76	26.7335	3	8484.29	8.48429	16.2077	43.8093	8.86668	23.3079	36.5466	2.8537	56.4993	22.0075	21.4932	80.3179	52.1864	2.62871	26.4365	89.886	16.5129	368.371	1724.58	10080.5	1624.52	2747.62	605.774	11.2422	10.0242	33.4333	19.453	1.52995	385.543
Med065	2	2	69	22.0829	1	8350.24	8.35024	22.2125	30.9831	12.2442	12.0062	45.7929	0	42.787	13.5779	43.6351	433.469	128.895	0.980565	36.3854	299.141	8.20586	855.443	1322.45	6014.74	1736.13	4957.19	1118.74	18.621	13.6798	92.0413	7.81765	1.02	668.929
Med065	2	2	69	22.021	2	8285.46	8.28546	20.0498	29.0742	11.9759	27.0444	48.483	1.28349	43.2469	11.6052	45.1479	237.504	146.031	2.25823	27.173	214.228	7.2407	565.362	511.64	2107.85	2016.12	3986.21	979.307	14.9687	15.5542	196.931	5.93631	1.00829	496.272
Med065	2	2	69	21.2003	3	8174.26	8.17426	17.6255	31.4421	13.3333	12.1554	48.0997	0	42.0867	11.7482	46.1651	173.131	149.506	0.911658	25.5415	112.808	5.81323	574.573	805.018	2572.77	2106.26	4235.1	1305.65	11.6621	9.68003	26.3042	6.59744	0.983309	565.781
Med066	2	1	66	33.6229	1	10003.3	10.0033	19.7992	40.2632	12.9577	15.733	40.617	0	42.1074	23.2129	34.6797	325.52	128.231	1.21418	24.5466	72.987	14.1553	359.553	355.684	567.095	2403.15	3762.75	594.785	13.4308	16.7064	227.35	19.8377	2.97311	315.383
Med066	2	1	66		2
Med066	2	1	66		3
Med067	2	1	74	24.3882	1	6735.47	6.73547	19.7601	32.788	10.3167	14.3281	35.3685	11.5152	48.2403	17.0251	34.7346	267.682	90.3195	1.38882	19.2121	160.675	9.3828	543.988	918.022	4708.58	1311.35	3325.62	1035.42	9.47789	7.69368	1093.86	7.30305	0.796675	355.328
Med067	2	1	74	23.858	2	7411.15	7.41115	23.8334	38.9755	6.91916	13.4348	33.6826	2.47929	37.7501	42.8078	19.442	302.616	94.3403	1.94168	36.7329	212.11	15.0106	521.478	1940.84	11832.1	1348.65	4270.22	1007.1	13.2104	10.475	1337.98	25.154	3.90899	492.602
Med067	2	1	74	23.8039	3	8855.24	8.85524	20.1916	33.6384	7.93736	16.1572	38.7093	5.20491	52.6523	21.4817	25.866	261.764	96.5156	2.03558	39.5573	208.386	17.0309	606.256	2638.89	15914.2	1565.27	4508.44	1176.87	14.8826	12.293	1515.06	13.4034	0.846802	518.124
Med068	1	1	78	25.8361	1	6821.67	6.82167	29.4176	25.6489	7.77375	9.57056	39.903	1.64472	40.4399	26.7125	32.8476	174.715	97.4444	1.23114	30.826	179.499	8.58659	487.194	1143.77	6675.98	2061.9	4426.07	1273.91	9.87283	10.0275	33.15	10.8092	1.02451	487.556
Med068	1	1	78		2
Med068	1	1	79		3
Med069	2	1	72	28.4287	1	5832.29	5.83229	30.1919	29.4618	8.85768	11.131	36.5953	1.92373	40.8693	26.6082	32.5225	165.924	62.2615	1.25665	26.4514	175.792	7.96838	402.506	1132.31	6580.06	1874.12	3320.09	835.403	8.62818	8.55902	33.774	10.5853	0.994178	334.31
Med069	2	1	72		2
Med069	2	1	72		3
Med070	2	2	70	32.5733	1	8941.87	8.94187	17.2817	38.4736	14.3387	15.2858	38.865	3.85289	43.8693	14.9794	41.1513	279.404	105.954	1.06605	28.7257	206.11	15.2544	361.244	1417.82	7506.19	1478.59	4039.37	1008.49	10.4957	8.21872		8.1483	1.28429	418.275
Med070	2	2	70	33.4808	2	12433.3	12.4333	19.0576	46.7743	15.863	7.55446	31.7328	1.3162	41.6295	21.7284	36.642	394.369	121.163	0.476233	47.0089	207.393	23.7933	722.496	2127.8	9797.02	2038.43	5154.23	1828.88	15.8033	16.1688	1656.09	26.8372	3.07395	785.172
Med070	2	2	70	33.8572	3	10351.6	10.3516	20.7599	45.3353	15.0006	19.2503	28.6359	4.17346	46.505	17.2564	36.2387	463.59	95.3617	1.2833	32.8794	120.064	17.0437	288.833	1332.13	6019.08	3540.4	4012.21	1104.24	13.7011	11.3877		15.167	1.82602	494.587
Med072	2	1	65	22.6342	1	7814.08	7.81408	22.0094	33.2567	13.2479	11.7413	35.4215	9.40579	38.6921	17.651	43.657	326.134	87.937	0.886274	18.6832	61.6225	12.1493	329.951	847.759	4097.16	1691.45	4454.14	1170.89	18.7269	17.9281	1035.86	9.35231	1.00647	436.454
Med072	2	1	65	22.2336	2	8396.47	8.39647	19.1618	41.5168	10.8166	21.6205	34.5703	4.01197	55.9394	16.0745	27.9861	206.03	106.066	1.99883	25.5401	123.166	16.4637	368.954	1028.19	5067.05	1830.41	3752.24	826.279	11.131	8.67519	85.0043	13.2183	0.937653	416.673
Med072	2	1	65	22.4974	3	8127.62	8.12762	18.07	40.1785	8.7642	20.4472	37.5261	3.3911	55.1238	21.2487	23.6275	207.101	92.9903	2.33304	23.9949	85.0224	14.0062	388.962	680.503	3401.39	1314.78	3069.4	602.179	13.6918	12.4085	493.728	15.3874	1.71096	359.871
Med073	2	2	75	23.4362	1	6961.73	6.96173	22.8611	41.0036	10.2488	19.2161	32.5431	1.75956	51.4145	21.164	27.4215	284.368	65.9721	1.87497	25.1105	79.5575	11.1853	437.923	652.854	2404.36	2364.86	3336.69	874.845	10.7421	9.96263		10.4492	1.86651	333.632
Med073	2	2	75	23.345	2	6510.79	6.51079	21.4475	34.2427	10.8764	11.6564	43.3862	0	46.5754	18.3102	35.1144	194.736	79.3538	1.07171	30.6848	79.0801	8.81993	380.053	1120.21	5535.95	2191.93	3180.14	815.73	10.5279	7.96971	1693.94	6.91712	1.50763	336.014
Med073	2	2	75	23.6909	3	7696.95	7.69695	14.5625	33.4231	10.1055	13.6686	50.1968	0	44.8305	22.0253	33.1442	237.013	78.9316	1.35259	31.0886	94.3478	10.9738	493.008	1292	5935.16	2399.12	2813.89	793.806	11.1022	7.94131	144.725	11.1734	3.1051	305.543
Med074	1	2	68	25.8843	1	4480.98	4.48098	20.1511	30.0854	14.5726	8.3394	48.8161	0	30.6926	15.6741	53.6333	103.331	55.3525	0.572267	13.6785	29.6132	2.45232	316.133	529.936	1973.49	1274.19	1356.03	599.753	8.6478	8.047	164.184	4.57767	0.798819	157.593
Med074	1	2	68	26.474	2	5116.23	5.11623	20.8508	38.6458	15.0953	25.9917	39.6226	0	41.4994	16.2693	42.2313	130.145	51.686	1.72185	13.0544	12.0984	5.31197	360.399	381.257	1009.79	1496.2	1596.24	908.728	5.57395	7.64707	175.645	7.83451	0.536873	208.36
Med074	1	2	69	26.4359	3
Med075	1	2	82	31.2324	1	9504.41	9.50441	14.1648	44.2251	20.3379	14.3593	39.5489	1.50234	34.9698	15.5005	49.5297	152.428	96.072	0.706037	34.3676	79.2063	8.48011	414.791	886.241	3651.95	2529.55	3062.24	886.337	10.7057	10.1523	93.5679	14.5153	1.73678	457.941
Med075	1	2	82	31.2421	2	10225.3	10.2253	16.8856	39.2358	18.7175	14.0673	40.9326	1.39643	35.8173	12.6324	51.5503	309.283	112.243	0.751561	36.0651	114.951	9.18469	330.905	795.045	1809.55	1621.61	4668.93	939.611	13.1051	12.1242	618.418	11.072	0.760605	559.628
Med075	1	2	82	31.5987	3	10738.6	10.7386	19.6928	35.9341	11.591	11.458	43.3234	0	34.2554	31.0917	34.6529	167.035	125.434	0.988529	48.5055	79.2936	8.71788	443.548	1683.44	9188.36	2316.39	4356.07	1310.02	15.2309	17.3975	325.449	27.1466	2.58866	556.866
Med076	2	2		27.2872	1	5615.93	5.61593	24.0078	29.688	6.19232	13.4419	40.6184	2.72653	49.9786	26.9977	23.0237	315.896	51.881	2.17074	29.9674	125.668	12.6313	401.028	1285.25	7574.98	1453.95	3491.84	546.524	12.5462	9.19166	498.536	9.47096	0.79944	404.303
Med076	2	2	65	27.7968	2	9086.5	9.0865	16.7559	41.312	13.4655	23.2415	39.7792	1.81918	41.3419	23.4922	35.1659	441.967	60.1278	1.72601	28.7997	45.9835	17.1629	307.955	625.312	1262.08	1663.21	3385.66	624.78	15.5182	11.7175	248.13	19.8534	1.64703	502.866
Med076	2	2	65	27.1356	3	5476.26	5.47626	21.0996	41.2911	9.30294	20.9378	34.2861	2.51646	54.7074	20.9854	24.3072	248.018	39.8604	2.25067	22.3533	76.3054	13.353	270.965	318.965	1335.42	1224.83	2733.84	501.966	10.4631	8.25216	680.821	10.2265	0.625468	312.29
Med077	1	1	79	22.637	1	11810.1	11.8101	16.6159	32.719	13.4887	9.62703	42.726	1.98367	31.7428	23.7814	44.4758	119.956	174.477	0.71371		463.529	14.9348	1767.86	3146.53	17244	2985.95	12929.7	1607.61	43.8924	21.4479	90.791	18.4376	2.37635	996.912
Med077	1	1	79	23.1983	2	13661.5	13.6615	16.6291	52.4689	10.6961	25.2094	28.5671	1.34498	50.8988	27.5053	21.5959	260.343	103.417	2.35687	66.1699	214.129	29.2277	610.053	987.848	4545.99	2085.89	5684.78	1421.56	20.856	17.7136	900.891	36.7108		982.915
Med077	1	1	80	23.4452	3	13092.2	13.0922	18.2782	46.7661	8.05364	21.0462	32.2318	1.35668	47.9013	33.7686	18.3301	174.118	111.828	2.61326	67.2699	186.843	28.7425	536.816	564.389	2521.28	2350.31	5264.69	1282.37	25.6197	18.8723	1552.2	38.8419	11.6935	894.751
Med078	1	2	77	30.5021	1	12176.2	12.1762	16.1351	35.8855	11.7241	13.9312	47.5288	0.0038107	41.5739	23.4387	34.9874	218.904	191.021	1.18825	40.9336	231.831	13.7912	663.985	832.395	2901.5	2493.81	5303.47	2031.48	13.3653	13.0157	174.948	23.4802	2.38545	731.468
Med078	1	2	78	29.3586	2	11313.5	11.3135	12.2084	48.0256	14.4383	15.7233	39.0284	0	41.4335	26.5181	32.0483	342.247	101.956	1.089	33.5625	146.294	17.1573	474.761	494.405	1343.26	1981.49	3631.64	809.255	12.0549	9.61351	47.2812	33.3374	3.07146	534.126
Med078	1	2	78	28.304	3	9065.29	9.06529	15.7358	33.8272	9.64593	9.30081	49.7793	0	29.5611	39.781	30.6579	112.78	111.36	0.964221	30.5156	83.6194	9.66822	359.385	934.948	4066.95	2023.24	3742.16	1217.38	14.5268	11.3811	24.0248	28.0909	2.64427	720.891
Med079	2	2	79	27.2932	1	9135.05	9.13504	14.0244	35.5139	13.5968	13.4324	49.9409	0.00476188	40.5259	18.4522	41.0219	177.071	126.649	0.98791	32.6394	212.036	9.1463	617.808	575.405	1967.75	2516.94	3308.13	1054.66	9.17746	7.84451	182.945	13.3586	1.74853	351.76
Med079	2	2	80	26.1102	2	10160.7	10.1607	12.8773	42.6123	17.1692	6.32735	43.6531	0	43.9804	12.8886	43.131	383.408	101.696	0.368529	26.9246	155.978	12.0101	434.809	553.094	1596.92	2711.9	3073.43	851.247	7.87382	6.82518	58.7402	12.646	1.31269	283.857
Med079	2	2	80	25.2673	3	6498.27	6.49827	16.1643	26.0578	10.646	10.6453	56.5371	0	44.1934	11.6101	44.1965	98.9416	118.658	0.999931	21.1863	92.0803	6.58153	260.056	826.991	3722.77	1977.11	3074.47	1118.66	5.74263	6.35828	34.3029	4.16195	0.767871	263.778
Med080	1	1	67	27.5055	1	9591.53	9.59153	19.0163	30.0622	13.039	10.794	45.6075	2.44916	39.2845	13.2602	47.4552	373.303	124.053	0.827823	46.8328	241.062	5.99367	736.959	1471.02	6954.62	3562.5	3369.54	741.882	14.9349	13.1522	119.531	8.03602	1.15099	340.993
Med080	1	1	68	27.9979	2
Med080	1	1	68	29.0017	3	6829.79	6.82979	28.0956	26.529	6.92917	13.9378	32.7577	7.96462	56.7244	15.0751	28.2005	241.576	71.0221	2.01147	15.4939	82.6707	6.36812	395.982	372.9	1646.16	723.966	3649.1	605.692	10.8903	7.93979	269.527	5.64447	0.737469	333.773
Med081	2	2	72	28.7428	1	7346.12	7.34612	16.7876	36.9367	13.4098	16.3526	38.607	6.50259	47.635	13.3025	39.0625	244.549	75.0622	1.21945	29.7589	113.652	6.769	270.42	1114.79	4924.37	1714.29	3143.8	552.403	11.274	9.52273	98.5835	7.85576	1.04145	367.429
Med081	2	2	73	28.1828	2	6031.1	6.0311	24.6493	26.6902	8.51644	9.91847	42.7348	5.10846	44.7497	19.4984	35.752	328.296	60.2357	1.16463	25.4809	83.7606	8.47239	322.508	324.009	820.233	1015.87	2824.97	582.066	12.2648	12.7501	524.982	6.48994	0.500911	365.76
Med081	2	2	73	28.1646	3	10002.7	10.0027	14.392	33.5037	9.77989	15.4713	47.1645	4.12935	49.6363	18.9871	31.3766	204.738	90.1975	1.58195	40.1983	128.978	15.8235	504.875	967.172	4741.67	2115.43	3568.5	916.955	17.7045	13.0702	188.107	14.5269	1.18286	585.384
Med082	1	2	69	27.6421	1	8957.31	8.95731	19.3922	37.5751	12.9382	14.6886	29.1881	13.2157	42.1769	20.6725	37.1507	222.144	70.2876	1.13529	21.9987	97.6079	14.7224	482.273	1030.56	5978.98	1702.84	3671.79	448.334	10.5174	11.6823	2084.69	14.1824	0.720915	363.681
Med082	1	2	70	27.0037	2	5775.69	5.77569	19.1949	31.4932	15.862	15.1873	31.4189	13.5211	35.5678	9.95966	54.4725	200.053	39.9528	0.957465	14.0335	127.623	3.85247	160.527	947.305	4191.68	1530.61	2248.22	538.027	8.19081	8.03665	196.368	3.68541	0.504237	227.807
Med082	1	2	70	27.5783	3	8766.86	8.76686	24.197	28.1628	11.9717	10.8591	25.8008		41.7488	12.225	46.0262	444.328	70.1782	0.907066	11.8514	116.577	7.13577	232.248	814.506	3236.1	3091.21	3178.33	587.073	12.0854	14.1645	214.667	6.04955	0.796717	313.048
Med083	2	1	77	26.5794	1	6926.25	6.92625	23.3734	36.402	15.1306	12.7772	37.0476	2.21072	38.8291	15.1898	45.9811	353.283	60.1993	0.844458	22.2513	88.8482	7.42908	530.153	1156.86	4696.66	1738.69	2957.87	1046.31	11.5171	10.9966	1178.7	7.17316	0.938804	327.018
Med083	2	1	77	26.0544	2	6007.39	6.00739	25.5172	33.0611	7.38419	16.607	39.2436	0	54.0387	21.9334	24.0279	151.621	67.8741	2.249	28.053	145.766	12.2385	474.137	1397.16	8122.39	1681.02	3120.63	672.717	11.9153	8.19898	2491.16	7.60545	0.712562	350.68
Med083	2	1	77	26.7986	3	6690.85	6.69085	24.8353	43.065	9.61957	23.036	31.0189	0	57.6194	18.3195	24.0612	182.768	63.0112	2.3947	24.0185	193.91	16.7413	617.573	1295.72	7081.73	1315.11	3387.47	696.142	10.5694	6.89773		8.76639	0.901603	318.159
Med084	2	1	68	25.092	1	6605.97	6.60597	14.3567	34.2847	9.61331	16.124	49.1858	0.0127247	51.4423	17.8873	30.6704	65.9248	67.476	1.67726	34.6822	135.894	7.82526	403.83	721.135	3883.3	1992.65	3403.14	535.606	12.9728	9.76928	45.7567	9.54036	0.714559	367.986
Med084	2	1	68	25.4845	2	6660.11	6.66011	17.5909	39.1374	12.19	18.5832	42.5156	0	51.4559	14.7906	33.7534	113.659	74.0979	1.52447	24.2175	38.685	8.10908	397.544	664.843	2810.34	2144.81	2398.47	810.73	9.20119	9.19572	110.383	8.36649	1.27725	281.879
Med084	2	1	68	25.1803	3	6230.65	6.23065	23.6379	32.8731	7.11632	16.8202	38.0988	4.42355	55.5447	20.9553	23.5	162.106	69.877	2.36361	24.4074	106.396	9.48501	446.016	314.665	1572.01	1121.2	3264.06	781.177	11.2369	9.51493	331.901	9.69179	0.757573	390.996
Med085	2	1	68	34.0289	1	8250.67	8.25067	19.8368	29.0403	11.3649	11.1176	48.2506	2.05503	41.8472	15.3746	42.7782	328.342	125.17	0.978237	30.4911	255.081	5.20013	691.468	1548.8	8230.59	2467.51	3619.15	646.773	13.0532	12.4125	114.2	7.33662	1.32934	305.468
Med085	2	1	68	33.3286	2
Med085	2	1	68	33.7534	3	8112.91	8.11291	10.0903	46.5251	12.9989	24.5907	41.3148	1.01875	56.8044	13.1683	30.0273	183.43	123.073	1.89176	18.2808	148.679	13.1369	391.473	412.839	973.382	1346.87	2188.78	603.654	8.34998	5.29538	211.296	10.6762	1.51736	229.348
Med086	1	1	66	24.3616	1	8331.48	8.33148	20.0987	28.3162	12.0752	10.33	45.3428	4.6142	39.7138	13.8629	46.4233	289.008	108.658	0.85547	24.2061	82.7948	8.35193	339.773	1173.74	5577.6	2239.53	4078.36	650.188	15.9332	17.9993	135.848	6.753	0.917605	416.14
Med086	1	1	66		2	9890.06	9.89006	22.6959	35.469	12.9424	15.5579	38.5247	1.55482	47.1802	13.571	39.2488	345.983	101.403	1.20208	22.006	119.681	10.23	421.271	919.881	3195.1	2627.84	3608.85	887.561	14.7219	16.9421	116.015	10.7847	0.938338	360.846
Med086	1	1	66		3
Med087	1	1	86	19.1716	1	13419.1	13.4191	11.5786	37.1468	16.1768	13.5432	48.38	0	39.7456	12.78	47.4744	361.045	178.981	0.8372	50.6849	207.307	12.9335	666.826	1972.02	7821.64	1901.49	5314.08	878.203	12.1612	12.1654	199.396	13.2287	2.13084	487.375
Med087	1	1	86	19.3094	2	8012.09	8.01209	14.3957	29.5522	8.28406	11.8708	54.0071	0.0114015	44.2628	24.8484	30.8889	156.243	159.847	1.43297	33.8882	113.718	8.44126	365.046	917.624	4829.36	1572.61	3243.45	672.466	8.92803	8.56527	1182.11	11.8293	1.60204	339.52
Med087	1	1	86	19.2219	3	9958.2	9.9582	18.5155	37.542	11.8577	17.8011	42.8862	0.0366934	50.7323	15.4738	33.7939	229.546	128.15	1.50123	30.4259	379.523	15.8541	662.212	884.721	3985.93	2465.57	4172.31	1024.5	11.7966	10.8353	1675.72	11.4898	1.44908	451.477
Med088	2	1	67	22.7334	1	8933.35	8.93335	16.5633	38.1844	10.4897	15.3553	43.6073	0	43.8812	26.1422	29.9766	323.18	140.184	1.46385	25.8116	168.457	12.6454	415.203	685.266	1795.89	1774.28	3348.34	1028.63	11.3631	8.42746	1865.2	16.559	3.52642	387.95
Med088	2	1	67	22.5973	2	7166.76	7.16676	18.928	39.1909	9.48922	21.2101	40.2153	0	57.1137	17.334	25.5522	256.072	77.2811	2.23518	26.4877	97.1373	13.6949	318.334	779.268	3519.13	2610.47	2984.84	571.954	10.3901	7.33442	622.435	10.3183	1.25862	307.738
Med088	2	1	67	22.3514	3	6953.49	6.95349	16.7135	33.1574	10.3714	14.5933	48.9286	0	46.8937	19.7791	33.3272	241.099	122.628	1.40707	24.0509	126.705	9.01151	284.437	924.414	4315.97	1428.9	3055.44	753.985	8.67647	7.18438	238.286	10.1702	0.941142	347.745
Med089	2	1	65	22.0985	1	6803.7	6.8037	18.9827	36.5812	10.9374	15.1409	39.9229	2.61029	45.1666	22.2063	32.6271	266.192	76.1261	1.38432	27.3897	108.742	9.99595	323.777	1205.66	5922.01	1661.81	2965.37	672.631	9.72577	8.33371	1022.23	12.0746	0.654029	343.176
Med089	2	1	65	21.742	2	10379.3	10.3793	22.2261	47.5509	11.929	25.6607	26.0985	3.54059	57.0333	16.4535	26.5133	586.951	90.0267	2.15112	23.912	118.044	19.8479	404.009	647.658	1994.69	1017.91	4029.29	717.495	12.3677	11.7004	321.423	19.1021	1.12829	486.933
Med089	2	1	65	21.4925	3	9638.99	9.63899	19.5141	43.8241	11.2276	21.1876	32.6317	2.85939	52.0119	20.4263	27.5618	422.216	77.5075	1.8871	34.1101	130.797	18.1296	564.126	925.513	3402.18	1257.14	4080.65	640.136	12.0704	10.2238	801.138	19.938	1.20226	486.27
Med090	1	1	65	27.5131	1	7771.95	7.77195	12.6479	29.3475	13.494	9.98863	57.2088	1.10098	37.1932	12.5613	50.2455	144.948	124.993	0.74023	25.934	63.8038	3.67763	236.051	763.038	2767.5	2356.12	2501.03	581.761	9.9377	7.58218	35.2448	6.10593	0.98058	333.089
Med090	1	1	65	27.7163	2	7402.4	7.4024	16.5185	31.8456	10.2503	14.7925	49.6315	1.16454	50.4044	14.6684	34.9272	169.499	99.2394	1.44313	25.5985	111.692	8.2089	326.681	928.166	3907.13	1923.82	3319.64	978.26	9.2606	7.5018	140.755	7.8426	0.75433	378.659
Med090	1	1	65		3
Med091	1	1	68	21.8672	1	10764.5	10.7645	17.9801	29.4867	12.2123	10.6772	46.5192	4.18939	39.7624	14.7582	45.4794	553.837	113.977	0.874296	40.7873	234.569	10.4175	656.255	686.543	1949.56	3378.28	4949.08	1329.13	18.3544	13.2933	359.515	9.76696	1.44768	525.158
Med091	1	1	68	21.5971	2	12715.7	12.7157	20.8677	32.8324	9.73105	15.7766	41.3845	3.61253	51.1768	17.2571	31.566	288.174	136.852	1.62126	44.5666	143.112	17.4667	604.028	1918.06	9318.78	2264.47	5521.18	1256.81	20.8741	17.4227	424.39	16.0321	1.90709	677.995
Med091	1	1	69	21.9991	3	13329.9	13.3299	18.7939	38.8993	9.6519	19.0432	38.6479	2.7603	52.1156	21.47	26.4144	253.045	123.585	1.973	49.8094	189.008	24.4616	1103.11	1660.19	8382.41	3884.27	5700.41	1488.23	21.7233	18.0859	681.131	25.9522	1.75068	829.762
Med092	2	2	69	29.1312	1	6739.79	6.73979	20.5408	27.9583	12.4232	8.97477	48.2126	0	36.1218	13.877	50.0012	253.32	84.8428	0.722418	30.7542	54.3133	4.72309	566.986	1280.94	5755.51	2243.97	3348.49	772.706	13.5184	12.6037	120.854	5.18302	1.23684	347.702
Med092	2	2	69	29.0063	2	10114.1	10.1142	18.0402	24.9959	10.3198	7.84219	51.0662	0.0361276	38.1925	16.3618	45.4457	290.242	172.458	0.75992	48.2291	181.566	9.00047	500.875	1393.45	5845.69	2769.85	5275.4	971.903	16.4272	11.3985	72.4215	8.84867	1.59281	437.309
Med092	2	2	69	28.705	3	6515.11	6.51511	19.027	28.8435	8.64917	13.0898	50.9896	0	50.3145	16.44	33.2455	158.105	96.8832	1.51342	19.609	56.4148	5.93703	720.175	343.951	975.826	1865.08	2434.8	565.915	9.05179	8.40403	253.98	6.24493	1.42188	235.427
Med093	1	1	76	26.9284	1	7238.13	7.23813	18.3414	29.1588	13.6934	9.47147	46.3168	5.07712	35.6053	12.9185	51.4762	233.26	59.4519	0.691684	23.3684	77.7954	7.0014	444.449	545.777	1471.61	2432.07	2397.17	678.506	11.1709	7.85163	480.92	5.48726	0.834927	300.611
Med093	1	1	76	25.4977	2	7892.92	7.89292	20.723	39.2261	9.00075	21.2636	33.8388	4.65592	57.8522	17.6593	24.4885	256.67	77.2194	2.36242	33.0724	123.882	14.8634	539.109	1076.39	5734.29	1650.23	3773.13	655.768	16.1148	12.2021	281.518	12.4444	0.957556	457.863
Med093	1	1	76	25.0767	3	8767.94	8.76794	20.2084	38.6914	9.79115	20.0692	34.9991	5.23909	55.0738	18.0573	26.8689	182.238	93.9613	2.04973	26.6437	205.027	14.2221	739.769	831.868	4149.26	2926.84	3971.09	887.733	14.1884	9.86456	786.651	13.5745	1.21668	455.676
Med094	2	1	74	29.5381	1	5485.1	5.4851	17.7325	27.0063	11.6916	9.39583	46.8714	6.69975	38.2477	14.159	47.5933	174.313	53.5278	0.803638	18.3035	59.2154	4.93461	249.094	431.443	1415.04	1646.48	2009.27	498.158	9.36138	5.81427	253.448	4.37833	0.627758	247.54
Med094	2	1	74	28.0849	2	6824.4	6.8244	21.8712	38.6051	9.1114	20.1724	31.7399	6.73114	56.266	18.3201	25.414	246.764	62.7613	2.21398	24.3002	91.9951	12.2224	463.611	817.471	4332.35	1262.65	3278.66	630.341	12.3603	10.8312	261.306	11.0647	0.714528	378.039
Med094	2	1	74	27.5083	3	7076.38	7.07638	20.4163	36.2875	8.99959	19.1184	35.9917	6.49145	55.3035	18.6635	26.033	182.066	82.8578	2.12436	21.498	154.138	10.9134	621.014	844.988	4444.68	1666.38	3401.25	813.152	11.8679	8.52029	379.927	11.033	0.84426	396.173
Med097	1	1	75	31.354	1	12290.3	12.2903	21.3202	30.5957	10.2187	10.8878	42.5425	2.49545	38.8368	24.7129	36.4502	313.042	127.664	1.06547	66.7899	167.988	16.1597	974.092	2133.64	12424.8	2810.35	5620.97	1032.48	32.8007	20.3366	1261.84	19.1466	2.21911	679.538
Med097	1	1	75	31.5139	2	10308.6	10.3086	20.6353	36.9058	11.258	17.1266	35.6974	5.84544	49.9021	17.2952	32.8027	369.344	106.988	1.52128	48.1871	85.5082	14.9202	841.696	731.583	2200.97	2721.55	4636.26	1365.81	24.5739	18.6866	161.316	15.3703	0.840075	675.915
Med097	1	1	75	31.6047	3	5259.23	5.25923	15.3072	19.4485	7.00032	7.34997	51.643	12.2281	40.6104	20.711	38.6785	32.8205	74.4924	1.04995	35.0044	70.4502	6.85952	502.311	917.904	4993.17	1387.09	2992.54	754.597	14.9231	8.99734	11.3594	4.79002	0.367648	399.81
Med098	2	1	70	25.189	1	7920.04	7.92004	22.7714	34.3493	12.6851	12.4729	39.5779	0	39.7249	19.8745	40.4007	235.181	99.0698	0.983272	31.9054	159.238	11.7709	303.216	1576.4	9056.96	1735.28	3709.89	895.788	11.4279	11.9159	1110.94	10.5169	1.51368	370.487
Med098	2	1	70	24.9696	2	6913.94	6.91395	22.7825	33.9376	14.186	13.4691	41.6758	0	42.8361	12.0478	45.1162	401.125	101.497	0.949461	24.3097	147.036	10.5324	381.277	1158.01	4615.18	2280.16	4037.16	1055.35	12.0467	8.56795	1160.04	4.90735	0.805511	427.324
Med098	2	1	70	25.9121	3	7672.13	7.67213	14.0649	37.0223	10.6069	18.0355	45.1571	1.20603	52.0392	17.3559	30.6049	96.7842	106.632	1.70036	32.2034	132.227	12.0945	387.899	1215.42	6242.72	1532.55	3180.67	964.047	11.4597	8.42639	453.087	11.2162	0.683009	396.435
Med099	2	2	67	24.2858	1	6955.39	6.95539	18.9245	33.2336	14.3261	9.53924	45.1148	0	30.9805	22.4929	46.5266	161.068	94.3844	0.665867	30.4556	58.1265	8.99515	367.923	1113.7	4940.43	1880.49	3197.81	1094.6	11.2054	10.4768	295.088	9.74043	3.05848	429.334
Med099	2	2	67	23.9511	2	6139.65	6.13965	16.3054	34.7401	14.1435	0	48.1035	0	39.9735	16.2636	43.7628	271.704	98.9777	0	17.6968	111.327	9.08305	255.821	517.912	1425.61	1292.88	2429.52	879.997	8.92765	6.48636	137.702	7.25288	1.19443	260.208
Med099	2	2	67	24.1166	3	7349.47	7.34947	13.6591	35.6978	15.8225	11.7485	49.943	0	35.1831	17.4333	47.3836	153.81	121.178	0.742517	25.4262	124.481	8.31053	374.368	567.805	1509.3	1249.24	3026.13	675.445	10.3604	8.78675	84.9764	9.89697	1.42285	344.728
Med100	1	1	66	34.3021	1	7488.19	7.48819	19.6953	35.9947	14.4874	14.102	36.7532	6.13446	42.777	13.2768	43.9462	378.595	75.05	0.973393	26.3954	71.6817	7.63633	391.489	641.648	2497.92	3623.78	2908.85	734.382	10.3926	10.2187	135.297	7.62023	0.940261	327.806
Med100	1	1	68	34.1121	2	5343.19	5.34319	24.9511	34.3817	7.66526	18.0689	39.967	0	57.5259	18.0703	24.4038	143.207	41.327	2.35725	25.6335	42.8477	7.74528	222.629	526.489	2456.68	3535.24	2527.84	524.184	8.55852	8.38176	23.86	8.00734	0.550461	291.766
Med100	1	1	68	34.2964	3	11419.3	11.4193	17.7889	45.74	8.71841	25.0839	32.0344	3.21814	58.1757	21.6043	20.2201	204.809	102.624	2.87712	45.1865	137.543	26.1175	604.245	1580.96	9498.94	1976.04	4362.98	796.474	13.4847	12.7134	668.166	27.0973	1.06254	591.754
Med101	1	1	67	30.4278	1	7763.27	7.76327	13.2147	29.5798	12.2792	9.14376	55.8377	0.0173244	34.7795	18.5147	46.7058	187.455	131.569	0.744652	30.1009	278.554	11.6197	410.268	1353.38	5811.36	1943.57	2757.76	580.91	8.31765	5.42343	456.971	8.25346	1.35919	275.663
Med101	1	1	67	30.4221	2	6411.81	6.41181	18.1283	37.0037	9.34298	19.0298	44.01	0	55.8872	16.6742	27.4386	193.86	75.0047	2.03681	26.2953	160.985	9.69308	483.496	789.362	3891.18	1404.86	2896.01	588.664	10.199	7.7776	248.906	8.80694	0.802932	307.301
Med101	1	1	68	30.9279	3	7090.91	7.09091	19.1245	39.5082	9.02967	20.7042	40.5883	0.0257654	56.6591	18.6303	24.7106	318.108	78.2282	2.29291	32.184	263.576	12.7105	454.654	844.212	3774.87	1495.91	3640.98	1115.94	16.6885	10.1071	121.83	11.9628	0.908621	408.375
Med102	1	2	68	32.6348	1	8727.9	8.7279	22.2898	39.2612	12.8679	14.3194	37.7817	0.465441	39.926	24.1953	35.8788	545.337	66.1171	1.1128	27.8496	85.7813	16.749	445.217	710.563	2465.95	2782.82	3329.78	611.765	13.3094	12.6748	1058.36	18.2921	0.942266	354.33
Med102	1	2	70		2
Med102	1	2	70		3
Med103	2	1	77	28.7005	1	9437.85	9.43785	18.0554	35.5754	13.074	15.2367	43.9636	0	46.9077	12.8429	40.2495	391.884	90.2787	1.16542	43.9385	141.137	12.7359	510.313	2889.19	15916.4	1978.22	4268.36	1021.29	15.5719	15.7425	512.913	8.91178	1.0575	475.986
Med103	2	1	68		2	10456.2	10.4562	17.7291	41.545	9.36411	21.2958	39.8278	0.000743362	55.4421	20.179	24.3788	391.638	74.5435	2.27419	40.7121	52.6716	18.1484	613.68	1530.66	8636.49	1533.65	4032.16	861.817	14.2104	14.302	1429.75	19.2846	1.18417	568.378
Med103	2	1	68		3	13082.6	13.0826	17.6331	49.9755	11.5865	26.1282	31.339	0	55.4988	19.8904	24.6108	512.169	118.945	2.25506	43.725	156.169	28.7203	668.797	2472.29	13145.1	1962.64	5240.13	1366.85	16.6103	14.9387	2133.98	29.6507	1.11549	647.23
Med104	1	1	76	21.9671	1	7195.35	7.19535	17.3566	22.6684	6.38157	9.10992	55.5102	0	45.9581	21.8478	32.194	153.524	122.71	1.42754	32.1974	115.986	7.16216	543.875	662.045	2637.56	1819.86	3121.86	1079.45	11.9983	9.0117	269.063	6.26267	2.74943	338.348
Med104	1	1	77	22.3796	2	10973.1	10.9731	17.651	31.2639	6.49946	13.9705	50.3956	0	48.5349	28.8853	22.5798	216.099	138.058	2.14948	51.9552	160.448	12.6908	893.105	1360.82	6354.92	2828.88	4333.79	1375.75	17.1906	13.7516	173.121	22.9332	1.41711	686.433
Med104	1	1	77	22.1859	3	8937.08	8.93708	22.1059	33.0794	7.66535	17.6274	44.2839	0	57.6196	17.3243	25.0562	193.657	133.315	2.29962	32.7494	165.946	13.1894	570.195	367.553	999.025	1728.92	4230.23	1450.04	14.6544	13.0017	427.226	11.5062	0.898737	580.431
Med105	2	1	70	23.197	1	7852.72	7.85272	21.8198	31.8694	11.9146	13.8101	44.1295	1.11521	47.1252	12.2178	40.657	219.745	85.4591	1.15909	30.3245	95.1431	6.02599	305.898	1339.48	7366.42	2357.47	3903.33	474.865	11.8473	12.6985	126.071	5.98859	1.34762	307.963
Med105	2	1	77	22.8949	2
Med105	2	1	77	22.6889	3
Med106	1	2	66	27.4272	1	4887.19	4.88719	17.9335	25.5704	12.0098	7.35174	53.8055	0.0186917	31.9209	15.9329	52.1461	96.8311	87.212	0.612143	17.5198	141.472	3.64059	555.154	540.595	1989.88	2109.95	2356.76	414.775	6.34901	5.89671	332.908	4.16168	0.563804	247.062
Med106	1	2	66	27.4956	2
Med106	1	2	67	27.564	3	7307.27	7.30727	14.8532	27.0466	8.75184	10.0027	45.4937	10.0784	40.8229	23.4591	35.718	305.456	110.835	1.14292	21.2368	210.425	10.5647	475.576	649.475	2954.88	1676.81	3178.22	775.37	9.28679	8.20955	670.231	9.80364	0.944364	344.709
Med107	2	2	73	32.4764	1	9808.42	9.80842	14.6991	40.5747	14.9143	17.312	44.6985	0	46.2375	13.9291	39.8334	250.085	105.019	1.16077	25.1353	42.7721	8.98839	253.642	757.356	2066.91	2048.57	2716.03	700.825	11.4434	9.81217	209.35	11.9444	1.76191	358.406
Med107	2	2	73	32.2909	2	10657	10.657	15.3323	37.9409	16.2221	0	46.1806	0	36.999	16.6118	46.3892	355.94	117.53	0	22.3	56.6441	7.56068	286.102	785.024	1061.8	3159.06	2571.63	815.419	9.64966	8.63226	225.817	14.8232	1.51667	404.418
Med107	2	2	74	32.3115	3	9477.62	9.47762	15.159	38.4816	16.7007	13.655	45.6378	0	38.5579	14.2842	47.1579	304.389	118.613	0.817633	22.4988	34.8564	6.83414	273.733	782.801	1010.9	2941.27	2776.68	641.176	8.36507	9.7472	328.238	11.3168	1.43427	371.764
Med108	2	1	80	19.5109	1	8049.48	8.04948	16.1747	46.2827	12.1061	16.9909	29.4744	5.7067	40.3304	30.9339	28.7357	213.9	79.3805	1.40349	30.6582	120.545	16.1755	297.45	1210.48	4609.16	1814.98	3187.59	838.805	11.03	8.70183	218.163	26.091	1.95079	397.681
Med108	2	1	80	19.2747	2	6320.9	6.3209	19.9522	36.7276	9.36486	33.5205	38.0653	3.8759	44.7766	28.1825	27.041	136.366	71.6269	3.57939	26.9677	175.892	10.99	360.863	1291.14	6740.22	2096.55	2919.27	743.237	8.66929	8.70357	387.656	15.0683	1.14622	341.383
Med108	2	1	80	19.1351	3	10095.5	10.0955	16.7614	52.7958	11.6115	28.6201	25.9954	3.64013	57.0729	19.7719	23.1552	227.393	83.9233	2.4648	31.5227	121.436	22.3925	403.69	933.617	3329.56	1821.31	3655.38	891.016	12.478	10.6831	791.935	23.503	2.64242	457.079
Med109	2	1	69	27.9695	1	6880.95	6.88095	19.5946	34.9592	15.7272	12.6344	37.4386	5.78572	39.5193	11.2874	49.1933	212.695	99.044	0.803347	24.2597	209.546	7.36465	284.583	1222.46	5348.66	1271.03	3363.19	788.391	9.37399	12.5786	161.113	5.48538	0.943559	316.821
Med109	2	1	70	27.2785	2	10141.4	10.1414	17.7324	44.0197	11.8878	17.3409	35.2402	1.81182	50.2897	21.0957	28.6146	152.314	93.5895	1.45871	45.8603	199.876	18.3404	728.276	665.398	2364.11	2988.03	4779.46	1150.12	15.7179	12.072	267.941	21.2717	2.28584	539.487
Med109	2	1	70	27.1477	3	7230.64	7.23064	24.8434	28.0877	8.73548	11.5737	43.1669	2.54119	44.9058	21.2006	33.8935	262.752	113.53	1.32491	24.508	163.749	11.0193	328.596	549.598	2201.32	1243.33	3754.53	995.313	9.34021	9.97034	989.039	8.5994	0.973463	359.541
Med110	1	1	66	28.5052	1	10468.6	10.4686	16.2052	41.2681	18.5366	15.612	37.3791	4.388	41.2288	9.81914	48.9521	289.912	84.1781	0.842226	38.3227	71.1072	9.79345	503.655	1067.8	1956	3566.72	3936.92	1046.84	16.6267	11.8148	227.919	9.1661	1.54418	450.721
Med110	1	1	67	27.3174	2	7886.46	7.88646	15.942	40.3962	9.73841	14.5754	38.1312	4.65973	59.0946	15.0978	25.8076	87.4473	86.1966	1.4967	35.1767	99.5631	14.7159	490.601	965.988	5233.8	2024.55	3621.16	871.217	13.9177	9.72615	775.811	10.5225	1.07181	450.031
Med110	1	1	67	27.0621	3	8775.46	8.77546	18.8478	36.1623	7.28679	20.9721	36.7688	6.80497	62.1814	16.2136	21.6051	235.894	100.665	2.87809	36.139	277.652	20.5589	507.348	1294.47	7075.44	1205.85	4602.42	1002.86	12.5439	9.89036	210.144	11.6704	1.28007	425.77
Med112	2	2	68	25.0329	1	10567.4	10.5674	20.5441	38.6452	11.0505	17.775	36.4124	4.31575	49.7997	19.2404	30.9598	301.581	152.159	1.60853	26.6408	202.852	20.4169	643.136	662.224	1796.13	2184.04	3991.62	1366.33	11.5928	11.2961	1680.98	16.2196	2.08374	462.055
Med112	2	2	69	25.4362	2	11228.4	11.2284	20.6081	43.1887	18.5727	15.9489	30.8293	4.55223	41.1089	11.0193	47.8718	463.951	110.903	0.858729	24.8627	198.779	9.77056	649.13	892.177	1451.56	2967.87	3433.89	1590.68	13.4875	22.2673	1470.12	9.47068	2.25494	385.386
Med112	2	2	69	24.6154	3
Med113	2	1	69	26.6141	1	8679.58	8.67958	24.5252	37.0804	17.2443	11.4831	37.8491	0.0022388	33.5598	16.0433	50.397	276.363	106.302	0.665908	23.597	193.492	7.70843	453.474	1091.22	3396.36	4289.41	4229.84	1889.06	13.8313	14.2381	487.266	10.8385	1.65394	494.933
Med113	2	1	69	26.8697	2	7128.35	7.12835	22.9913	36.4389	11.3233	21.3357	39.5832	0	46.6288	20.6288	32.7425	427.159	88.4883	1.88423	23.8189	202.896	15.5482	372.347	1042.12	4343.78	1838.81	3356.47	952.646	10.9524	9.6206	480.29	11.4825	1.1571	371.609
Med113	2	1	69	27.2825	3	9779.45	9.77945	17.4924	34.3715	6.3358	19.2657	45.2015	1.16807	60.5226	19.5736	19.9037	140.174	95.2026	3.04077	65.0991	240.083	28.2302	530.28	1253.99	7029.12	1367.05	5471.67	927.718	18.3082	12.0397	158.208	14.7688	1.50678	673.075
Med115	2	1	73	21.9992	1	6003.33	6.00333	22.631	30.0099	9.85802	10.6744	40.9331	2.75347	38.283	26.3618	35.3552	136.139	99.1335	1.08281	30.1676	252.423	9.91275	390.239	1344.82	7576.96	1048.6	3604.89	653.972	8.59088	7.59536	361.557	10.289	1.11759	345.509
Med115	2	1	73	21.2637	2	7925.8	7.9258	19.6166	37.2685	8.77567	24.526	39.9569	1.54553	55.4276	19.2237	25.3486	166.966	100.656	2.79478	43.1052	243.469	16.1295	686.838	1288.17	7097.1	1674.9	3941.39	788.097	13.4057	10.1634	839.357	12.2786	0.990214	463.549
Med115	2	1	74	20.619	3	8887.81	8.88781	18.2633	43.6694	8.04582	25.3855	34.4766	2.06737	61.6161	18.855	19.5289	200.528	97.66	3.15512	41.7448	442.8	26.6132	588.925	2064.29	11652	1058.39	4987	935.234	12.9611	10.5871	667.616	16.34	1.41218	435.264
Med116	1	2	68	25.2795	1	8424.19	8.42419	18.0346	35.1125	17.6116	11.8282	38.0522	7.32962	36.3479	9.53225	54.1199	218.974	96.6133	0.671618	20.992	284.004	6.59694	291.597	664.731	1269.74	4748.9	2797.65	872.117	7.7697	11.1397	65.4367	6.25323	0.908774	298.978
Med116	1	2	68	25.3177	2	11768.9	11.7689	13.8683	35.5082	10.5071	15.6115	29.0987		47.0458	21.2906	31.6636	170.464	82.9884	1.4858	33.7288	319.714	15.2244	416.618	890.892	3952.15	2847.23	3642.97	603.896	12.3607	8.92098	502.473	20.234	1.52578	446.883
Med116	1	2	74	24.7093	3	10367	10.367	13.6937	35.9522	11.8435	16.1236	32.4197	15.1826	47.9994	16.7431	35.2575	199.776	111.196	1.36139	29.4917	381.071	10.1804	354.008	446.963	976.219	2851.86	3763.13	1124.59	21.1253	22.1806	837.111	13.7699	1.17172	563.299
Med117	1	1	65	27.2034	1	14364.1	14.3641	12.3901	44.9275	10.6407	22.7995	41.6383	0.923698	53.8314	21.0452	25.1234	243.41	230.263	2.14268	39.3235	238.819	25.8918	870.572	864.144	4173.86	1957.98	6030.21	1021.74	15.5718	14.3311	413.686	31.5298	2.28847	623.053
Med117	1	1	65	26.9976	2	11095.7	11.0957	15.496	32.2546	6.66417	23.0429	45.7058	4.05688	58.0583	19.857	22.0848	257.568	183.612	3.45774	55.4571	436.136	18.5557	668.37	1356.84	8122.51	1721.33	6287.57	813.548	14.9712	11.6317	513.918	16.0205	1.05694	534.817
Med117	1	1	65	27.1739	3	13174.4	13.1744	20.3962	25.6127	6.06926	14.6867	51.6216	0.625315	58.8493	16.8313	24.3194	197.213	205.457	2.41986	93.1241	254.146	22.8722	811.715	2472.19	13530.4	3885.2	7890.57	1348.84	25.4474	22.4824	525.315	12.3252	1.66672	708.783
Med118	2	2	75	19.9929	1	10685.2	10.6852	16.6124	33.9064	14.5908	11.9615	47.2151	0.85085	36.9128	18.0603	45.0269	328.384	174.686	0.819796	39.7958	99.2508	10.0942	332.442	1707.21	6991.26	2937.38	3571.4	1290.66	11.4199	10.2569	72.3847	12.874	3.82973	346.928
Med118	2	2	75	19.9522	2	11191.4	11.1914	16.7733	42.2797	21.2518	11.9636	38.2894	1.35622	30.7443	14.6422	54.6134	616.761	156.994	0.562944	35.2485	260.608	9.8828	470.442	1594.92	3269.95	2914.65	3917.16	1526.7	11.5376	12.9357	223.74	13.7332	2.91441	396.998
Med118	2	2	76	20.3849	3	10568.3	10.5683	16.7304	37.8894	19.5004	10.9816	43.2332	0.752785	32.0185	11.1251	56.8564	569.199	157.56	0.563148	34.0291	237.436	8.77172	478.464	1966.6	7063	2624.29	3341.47	1675.23	11.0446	12.1564	153.517	9.08325	1.54193	368.153
Med119	1	2	73	28.0836	1	7468.54	7.46854	20.094	33.6831	13.0013	12.04	43.4591	0	38.6587	19.596	41.7452	274.211	107.746	0.926065	31.1139	225.654	9.6555	489.449	1409.56	6436.55	1272.85	3582.99	1384.25	11.0498	10.6541	75.8987	11.341	0.70027	393.96
Med119	1	2	73	28.7504	2	5936.44	5.93644	22.8605	27.2282	9.61513	9.44769	48.104	0	38.202	22.919	38.879	261.249	95.2097	0.982586	23.9244	71.7071	8.35398	236.546	968.608	4803.43	1581.93	2554.12	745.089	9.76944	11.5355	104.652	8.16369	0.684867	327.61
Med119	1	2	73	28.0634	3	5038.98	5.03898	21.1722	36.0501	13.152	14.4161	40.8099	0	43.3711	17.061	39.5679	301.546	56.4909	1.09612	20.8788	43.2775	8.63992	235.97	869.007	3619.82	1025.46	2022.97	491.436	9.42516	7.80355	80.0477	7.01298	0.457124	270.006
Med120	2	2	69	24.3062	1	6846.59	6.84659	18.0097	30.3139	8.9219	11.7392	47.5303	0	42.0882	25.9245	31.9873	207.223	125.851	1.31578	26.9058	216.504	8.78677	283.107	780.364	3403.17	1341.84	3566.41	1100.26	11.1042	9.22629	44.24	11.6567	1.79051	420.202
Med120	2	2	69	24.6285	2	6664.14	6.66414	17.962	30.7234	11.1017	11.1841	50.2812	0	39.6801	20.9321	39.3877	238.074	98.9825	1.00742	24.5717	70.6196	8.25835	211.485	892.27	4299.04	1806.61	2950.55	980.949	10.6075	10.3286	84.6878	9.64577	0.942222	354.473
Med120	2	2	69	24.7831	3	5294.44	5.29444	16.513	37.5955	13.8422	16.1543	43.7756	0	46.468	13.7148	39.8172	215.216	79.4336	1.16704	21.1368	45.6589	7.95824	268.919	802.244	3867.8	1029.35	2091.56	463.36	7.75446	6.89227	56.9267	6.19791	0.59298	252.701
Med121	2	1	67	25.734	1	8001.11	8.00111	20.0051	29.2061	14.4144	10.7503	45.0484	1.84648	38.1262	10.7528	51.121	257.408	133.092	0.745804	28.1566	196.91	6.50427	321.651	1158.59	5266.5	2456.82	3917.44	651.686	14.8149	12.4029	601.661	4.57688	1.07101	347.786
Med121	2	1	67	25.6143	2	9256.62	9.25662	14.5287	47.2391	9.72875	32.9976	37.1146	0.0197372	61.5288	16.7992	21.6719	155.338	81.3767	3.39176	50.8526	223.16	21.8553	502.486	1284.79	7031.14	2994.74	3757.51	921.164	15.4187	9.87395	723.055	16.5572	1.47074	488.374
Med121	2	1	67	25.299	3	9320.71	9.32071	18.4797	47.6865	10.6169	25.2331	31.8097	0.821397	56.3221	19.9801	23.6978	199.563	97.572	2.37668	34.9336	170.791	21.5211	545.039	788.06	3772.87	2099.55	4203.68	1095.48	11.9082	10.391	1960.67	19.1588	1.37005	469.234
Med122	2	2	72	26.1466	1	6303.41	6.30341	19.6761	32.7476	12.5923	11.6535	35.7607	11.6602	38.9758	18.9087	42.1155	179.537	35.4903	0.925449	18.9995	96.5096	6.78886	274.037	1488.15	1795.17	2755.62	3063.73	462.024	11.7301	9.94964	107.114	9.01207	0.639389	315.685
Med122	2	2	72	26.3531	2	8029.14	8.02914	22.6314	40.8025	10.0953	17.8722	26.9018	8.2778	46.8776	26.6431	26.4793	324.671	48.5264	1.77035	28.5299	85.5443	17.582	412.483	580.093	2962.01	1626.29	3556.13	549.789	14.0439	14.7555	112.761	21.0493	0.825946	483.692
Med122	2	2	72	26.5539	3	4337.12	4.33713	17.6118	33.4903	6.49106	15.1683	35.0102	12.0105	48.6458	30.5369	20.8173	111.686	34.1746	2.33679	19.7819	108.87	10.4628	306.32	947.308	5833.46	2027.15	2270.35	325.921	8.37778	5.97295	19.4323	10.2845	0.824625	271.988
Med123	1	1	72	24.1746	1	11495.5	11.4955	18.5659	35.4491	14.7277	12.987	45.8238	0	39.642	15.4025	44.9555	424.389	91.6515	0.881806	35.6899	62.3978	9.23916	539.148	1272.81	4434	3337.83	3881.6	969.294	16.2578	13.5518	85.3246	13.0364	2.55354	540.893
Med123	1	1	72	24.4926	2	11835.9	11.8359	15.6581	45.3305	9.67683	25.7298	38.3874	0	60.0339	17.4551	22.5109	286.933	123.24	2.65891	42.4525	132.771	21.4229	580.31	1225.11	5307.86	2257.67	3751.24	934.421	16.7246	11.0661	1188.24	20.2589	2.21196	562.903
Med123	1	1	73	23.9591	3	10007.9	10.0079	18.0433	44.3334	11.2273	20.5443	36.6595	0	49.7731	23.0262	27.2007	314.196	114.334	1.82985	43.9464	194.022	20.1659	586.055	2771.45	15739.9	2141.69	4332.05	1298.36	17.352	12.0478	1548.12	20.9175	2.76792	500.576
Med124	2	1	74	27.3312	1	7673.77	7.67377	17.3529	33.2126	12.6714	12.6917	47.6412	0	41.8299	16.4074	41.7627	277.815	73.3139	1.00161	27.3097	62.7687	6.78919	316.182	1055	4472.79	1584.38	2728.8	714.174	11.9522	9.27215	54.5899	8.69052	1.73086	351.129
Med124	2	1	75	28.5934	2	10864.6	10.8646	14.1622	51.3173	11.0508	0	33.3048	0	58.0564	19.0548	22.8888	266.848	103.927	0	38.1767	95.0028	22.597	350.538	1176.12	5265.35	1986.66	3421.72	856.324	14.0866	9.40756	1179.97	23.1812	2.63023	485.38
Med124	2	1	75	28.0515	3	7311.85	7.31185	17.2861	43.1892	10.6036	19.4878	38.3707	0	49.0633	24.2407	26.696	305.591	85.3646	1.83785	29.1828	130.913	15.087	390.977	2155.61	12188.1	1461.55	3109.39	819.062	12.387	7.99929	1546.12	15.1509	2.1035	328.957
Med125	1	2	69	23.9689	1	10897.9	10.8979	23.5902	39.6346	10.5601	17.7022	30.2054	4.20103	48.4434	22.6583	28.8983	408.094	114.039	1.67634	40.6355	216.44	16.37	639.787	1387.98	6890.57	2826.09	5863.85	1521.53	18.1834	19.8216	1916.17	19.7881	2.51763	660.587
Med125	1	2	69	23.27	2	10528.8	10.5288	25.4995	31.0389	9.5022	13.064	38.6587	2.7626	45.8961	20.7212	33.3828	436.94	123.182	1.37484	43.0366	213.983	19.3088	613.536	868.476	3046.95	3067.97	5803.18	1455.94	19.0353	17.6992	1750.29	13.1681	1.69409	666.508
Med125	1	2	69	23.1764	3	13236.9	13.2369	21.2659	34.7767	9.10659	16.7042	39.7446	2.48072	52.4279	18.9901	28.582	250.785	126.281	1.8343	48.8834	194.282	22.3925	546.589	1147.61	4669.36	3131.69	5084.28	1413.4	35.9414	16.3358		16.4936	1.83559	705.019
Med126	1	2	66	26.0125	1	9755.89	9.75589	19.5653	30.1699	10.7208	12.1694	45.3032	2.84628	43.8753	17.4721	38.6526	325.316	134.817	1.13512	44.4538	127.693	14.6465	422.366	951.621	3716.48	3576.16	3988.23	1056.98	17.741	16.3511	162.592	11.1738	1.37725	467.569
Med126	1	2	66	26.4654	2	11765.5	11.7655	20.7635	31.5575	9.43618	12.3982	43.9628	2.83923	42.5497	25.0661	32.3843	259.164	100.534	1.3139	35.4396	46.5433	17.3672	456.325	394.615	891.205	3086.78	3389.53	955.998	16.5622	17.4182	263.825	21.7997	1.21485	524.646
Med126	1	2	66	25.7306	3	12101.2	12.1013	14.3639	35.521	17.0911	11.6535	44.403	4.89472	35.5967	12.1969	52.2064	370.28	131.324	0.681846	29.964	103.618	13.1078	263.847	1068.84	2976.99	2892.36	3309.98	1030.1	13.6539	14.9492	176.079	11.318	1.43821	382.792
Med127	1	2	68	24.5514	1	9976.06	9.97606	17.7105	24.7662	10.5784	9.04721	53.347	3.06928	38.6413	16.1777	45.181	249.877	185.613	0.855256	24.0158	268.314	6.23015	471.535	605.863	1860.48	2069.73	4282.36	997.123	15.5069	15.5574	254.114	8.33547	0.999676	417.036
Med127	1	2	68	23.9817	2	8340.95	8.34095	18.227	34.9085	18.6302	11.2681	46.3106	0	33.5295	11.0343	55.4362	383.428	109.453	0.604831	19.332	58.7353	4.51286	370.772	666.874	1074.59	2115.13	2579.31	985.091	13.4975	13.3099	155.416	6.95088	1.17675	290.265
Med127	1	2	68	24.0196	3	11192.7	11.1927	13.0323	36.8603	16.4543	14.0546	49.528	0	41.1964	10.5733	48.2303	218.53	192.129	0.854159	30.3919	92.2161	14.1168	500.031	589.756	792.88	2895.35	3536.71	1263.69	13.8086	12.5559	81.5149	9.98534	1.0223	374.933
Med129	2	1	65	28.7184	1	9168.44	9.16844	20.8888	42.9007	15.6273	15.0803	35.0297	1.19107	38.0321	22.5564	39.4115	331.041	75.3396	0.965	24.5118	88.9486	8.82124	345.653	867.386	3482.22	2785.96	3515.44	807.43	17.4674	13.257	1135.75	19.9935	0.971128	578.891
Med129	2	1	66	27.3069	2
Med129	2	1	66		3
Med130	2	1	70	27.2903	1	7781.47	7.78147	21.5668	25.8412	10.531	9.41593	48.5189	0.00349607	40.648	13.8903	45.4617	426.368	154.365	0.894115	23.4992	109.646	4.45492	700.014		1268.02	2409.86	3828.22	1336.4	12.3171	12.3948	332.315	5.19645	1.32089	368.56
Med130	2	1	70	27.7746	2	9269.91	9.26991	17.6038	42.6321	10.6864	18.5256	38.8881	0	58.4486	15.0204	26.5311	334.972	115.702	1.73357	29.7385	175.655	19.0067	377.824	1952.44	10880.9	1830.39	3665.7	1032.48	10.0473	9.96172	1102.6	12.8159	0.957811	399.803
Med130	2	1	71	28.7576	3	9092.21	9.09221	19.6025	32.5175	9.79856	14.092	46.6146	0	46.5407	21.0982	32.361	379.671	145.961	1.43817	32.4851	227.18	12.0308	369.47	3730.27	20530.8	1628.11	4100.15	1374.45	10.6191	10.4821	1609.03	12.0186	1.73253	431.827
Med131	1	2	76	26.746	1	10506.1	10.5061	19.747	30.8701	10.2534	12.5145	44.776	0	44.7092	18.6595	36.6312	374.92	97.4697	1.22052	46.176	179.448	11.6602	726.763	636.017	2283.39	2797.62	3898.33	562.37	22.0026	12.516	91.5962	13.0916	1.91293	463.816
Med131	1	2	76	25.4462	2	10025.5	10.0255	16.5092	27.3135	6.29953	11.3934	54.7806	0	45.7803	28.9072	25.3125	93.2653	89.4099	1.80861	53.323	263.346	14.4295	805.757	469.793	2144.59	2970.69	4211.86	797.224	21.1318	13.8867	10.82	17.7321	2.02761	530.949
Med131	1	2	76	27.2285	3	12259.8	12.2598	20.1415	39.9628	14.8904	15.4464	39.516	0	44.3697	12.8578	42.7725	450.269	116.969	1.03734	31.739	93.4444	8.05478	545.425	456.372	419.295	3354.24	3364.86	819.111	20.1133	23.1288	448.224	12.4342	1.93287	402.066
Med132	1	2	79	23.953	1	9476.54	9.47654	11.2145	38.061	15.3179	11.1703	47.782	0	31.4551	25.4104	43.1345	289.543	152.486	0.729235	27.4799	84.4266	20.0582	358.6	818.756	2345.65	1964.99	2389.23	942.904	12.6287	8.6488	270.101	21.3233	1.34702	333.516
Med132	1	2	79	23.9951	2	11814.3	11.8143	11.9788	47.5109	14.9434	24.8893	40.0337	0	55.721	10.8243	33.4547	252.093	121.021	1.66557	23.502	41.571	15.7125	370.505	442.421	823.705	2944.09	2510.28	854.936	15.312	11.1334	111.436	13.7264	1.43682	297.127
Med132	1	2	80	24.1702	3	11391.2	11.3912	10.9168	42.4894	14.1871	21.1479	45.7972	0	52.9829	11.4735	35.5436	290.698	169.736	1.49065	22.1227	154.079	12.8523	714.017	751.166	2738.3	3068.85	2954.6	928.714	15.4194	9.51288	60.455	12.3835	1.56752	289.203
Med134	2	2	65	29.4221	1	9989.12	9.98912	17.002	40.5804	15.0193	18.1406	36.3035	3.10231	47.3004	13.5377	39.1619	251.462	98.5129	1.20782	25.1826	239.398	12.2879	348.572	792.088	2002.59	3238.15	3539.5	1103.8	11.4075	11.4247	1228.1	10.2	2.36605	355.501
Med134	2	2	65	29.4221	2	9221.69	9.22169	19.3804	38.8252	13.8472	16.9505	39.5685	1.49439	47.0549	14.5049	38.4402	462.476	78.2582	1.22411	20.5113	138.544	13.0418	307.666	1079.72	4956.33	2038.93	3242.3	785.667	9.20692	11.4642	189.132	11.532	0.97348	347.164
Med134	2	2	65	29.9638	3	9728.73	9.72873	15.8683	33.0955	13.9393	12.3125	48.1747	2.12386	39.5209	15.7362	44.743	341.747	129.463	0.883288	23.8385	147.83	9.94402	439.539	1089.45	4530.89	2947.78	3573.2	875.288	12.2047	12.5603	112.359	11.3486	1.2355	449.919
Med135	2	2	76	27.9792	1	13827.2	13.8272	21.7128	33.376	13.3359	13.0828	40.4412	1.32886	42.0083	15.1708	42.8209	723.24	168.869	0.981024	41.4567	199.478	13.9969	829.617	2067.54	8724.35	4103.91	5307.98	1285.23	17.0225	14.0534	166.026	13.2739	2.78692	497.359
Med135	2	2	76	28.3828	2	11183.8	11.1838	15.9544	36.2613	14.6902	14.421	45.3952	1.64295	42.913	13.373	43.7141	456.047	154.291	0.981675	44.6241	198.215	14.9473	573.729	1120.6	4270.06	2460.1	4727.43	1111.13	14.1273	12.2224	71.3896	11.7883	1.85833	545.745
Med135	2	2	76	27.2955	3	11753.1	11.7531	18.1677	41.6186	15.3409	17.2074	36.2271	2.86617	44.0695	16.6411	39.2894	487.722	135.914	1.12166	37.8253	226.213	26.0924	619.203	1738.75	8359.4	3086.6	5224.45	1099.86	15.5359	15.7549	129.273	18.5131	1.50953	484.892
Med136	1	1	79	28.37	1	8385.22	8.38522	14.7833	33.4735	15.8437	11.5157	40.2707	8.20284	37.5038	10.8972	51.599	257.952	101.7	0.726834	21.1163	87.1271	7.2596	256.373	812.726	2265.72	1476.66	2680.31	488.071	12.6561	11.2109	1056.65	5.19421	1.09533	279.429
Med136	1	1	80	28.2504	2	7205.55	7.20554	16.6135	45.0632	10.7815	18.2957	34.8178	2.72004	56.3518	18.1559	25.4922	127.56	64.8967	1.69694	25.3657	130.109	14.8262	345.472	428.043	2084.55	1387.54	2703.58	560.111	9.98267	8.29936	1166.53	12.6142	1.058	318.558
Med136	1	1	80	27.784	3	7736.86	7.73686	19.2303	44.7835	13.1379	22.0781	32.8938	2.37492	52.9175	15.593	31.4894	235.709	59.8415	1.68049	24.0748	87.9488	15.9756	404.566	479.466	1904.33	2067.91	3132.71	853.658	11.8207	9.17764	1816.62	10.3944	1.17677	362.049
Med137	2	2	70	26.7214	1	7767.18	7.76718	13.6176	36.6825	17.6313	11.1686	42.4839	4.33552	32.9758	14.9667	52.0574	283.942	88.3785	0.633451	22.5997	94.0216	7.3256	240.863	698.733	935.202	2577.83	2740.46	860.525	9.06735	7.35892	215.21	9.03583	1.23765	333.528
Med137	2	2	70	27.0974	2	7436.68	7.43668	23.2877	34.5373	10.1193	15.2371	40.04	1.48185	47.5482	20.874	31.5778	155.465	56.3492	1.50575	31.6459	172.936	12.0245	293.334	929.958	5741.49	1275.2	3418.4	327.922	13.2745	12.8152	345.448	12.1568	0.786185	398.438
Med137	2	2	70	25.6985	3	5763.23	5.76323	23.5972	36.9625	16.7447	13.3655	35.2313	3.63303	38.5383	13.1799	48.2817	194.12	64.6025	0.798197	16.9428	72.8338	6.47786	331.02	602.932	1898.87	1562.34	2568.16	599.457	8.04554	7.74359	57.9664	6.27145	0.559489	267.845
Med138	1	2	67	29.019	1	9472.44	9.47244	22.8935	43.6948	13.9158	19.8384	21.9459	7.23631	49.274	16.1624	34.5636	500.3	48.6468	1.4256	19.171	96.7211	12.291	451.787	488.114	608.614	2131.18	3640.48	730.492	11.6174	15.4883	469.776	14.5048	1.68545	475.511
Med138	1	2	67	28.4945	2	9316.93	9.31693	23.0486	37.1854	16.9201	12.4764	29.2118	7.88764	36.5615	13.855	49.5836	383.607	58.1303	0.73737	18.0493	123.817	7.2336	410.218	1073.96	3773.08	3307.63	2954.3	940.41	9.32028	11.2778	1260.52	9.63377	1.00121	357.131
Med138	1	2	67	28.3474	3	8602.71	8.60271	23.2343	37.1429	11.8684	15.0668	25.3137	10.7888	44.3897	20.6437	34.9666	448.883	35.3398	1.26949	15.0665	60.6394	8.61686	369.678	421.557	886.39	2535.11	3036.88	693.725	9.77555	11.4648	1322.13	13.2048	1.63247	325.657
Med139	2	2	65	27.8054	1	6584.42	6.58442	25.1039	36.3497	11.9487	15.8142	29.4576	6.51241	47.9264	15.862	36.2116	372.249	55.7954	1.32351	15.5789	100.707	9.61991	290.238	1637.51	8220.37	1389.06	2839.21	511.36	9.15727	11.409	413.937	7.82038	1.08159	348.42
Med139	2	2	65	27.9457	2	8126.38	8.12638	26.6687	32.5248	16.4332	9.8161	35.7904	4.37085	33.3496	10.8195	55.8308	437.594	73.763	0.597333	17.1716	137.601	4.87856	389.145	1229.57	4991.59	3212.86	3291.7	816.847	9.35896	10.5598	1266.22	4.71344	0.944396	295.74
Med139	2	2	65	27.8105	3	6742.81	6.74281	23.3421	39.9718	11.7502	16.9141	32.8649	2.89724	46.1493	21.7907	32.06	387.142	49.9132	1.43947	17.2874	78.9686	7.90383	319.159	377.976	1014.61	1720.2	2814.98	628.988	9.04445	9.32919	352.233	12.6398	1.52655	271.455
Med140	2	2	75	28.9127	1	8085.62	8.08562	20.6512	33.6475	13.9323	11.6758	42.0768	0	40.0406	12.1804	47.779	354.2	104.297	0.838036	23.0694	52.1298	8.16292	338.457	854.727	3739.17	1215.3	3537.16	857.699	12.5617	10.7391	1306.74	5.25212	0.872668	338.672
Med140	2	2	75	28.8072	2	6271.28	6.27128	20.9848	24.9665	8.84295	9.17078	52.5616	0	40.5971	20.2571	39.1458	198.718	105.411	1.03707	24.5879	98.6806	5.85517	236.799	905.096	5523.59	1145.33	3358.86	674.016	9.40043	8.92906	1215.21	5.72156	0.494098	277.938
Med140	2	2	75		3
Med141	1	1	74	28.0993	1	8995.92	8.99592	21.559	33.9034	13.1642	14.0866	32.2529	8.43919	44.6974	13.5319	41.7707	305.324	113.288	1.07007	28.2873	304.512	12.6717	357.109	1110.73	5196.56	1416.89	4990.24	649.02	14.8651	12.4774	124.466	8.42062	1.53446	465.385
Med141	1	1	75	28.0644	2	8641.67	8.64167	20.6879	28.3572	5.64064	11.7431	40.8804	8.51576	58.2808	20.1697	21.5495	131.877	85.1858	2.08187	40.5326	249.835	15.9432	489.046	1129.36	6561.87	1549.17	4499.86	852.281	15.555	10.7925	1758.86	9.72262	0.529095	482.036
Med141	1	1	75	27.7429	3	7398.29	7.39829	23.2732	22.5346	4.56253	12.1642	45.8779	6.94875	58.884	19.0298	22.0861	108.964	84.3494	2.66611	37.009	307.126	11.4684	622.146	1100.87	6793.54	1306.31	4913.78	840.085	15.1381	10.2413	1139.53	5.8206	0.544249	425.706
Med142	2	1	69	23.0118	1	7766.04	7.76604	23.8028	33.8597	9.06819	16.7739	32.5483	5.53695	53.0749	18.2321	28.693	237.341	89.039	1.84975	29.173	311.846	16.2052	355.604	1362.52	7102.04	962.994	4548.9	593.317	13.4772	12.4633	247.935	10.2257	1.31593	478.196
Med142	2	1	69	23.1445	2	7515.31	7.51531	20.9766	25.3283	6.09525	20.9457	42.5229	9.77972	56.5253	17.9593	25.5154	148.922	95.0561	3.4364	30.7271	266.638	13.8178	472.433	1154.79	6430.23	1385.42	4020.59	708.053	10.5994	7.72315	1775.31	6.02722	0.574814	413.69
Med142	2	1	70	23.0767	3	6463.64	6.46364	23.7636	23.6094	4.73701	12.8522	41.7929	9.37491	59.5314	18.5268	21.9418	114.665	75.8985	2.71314	30.7048	305.761	10.5461	592.326	1008.06	6211.2	1075.49	4256.77	538.32	10.4282	7.54038	1289.13	4.88518	0.456292	355.956
Med143	2	2	79	20.7899	1	8106.75	8.10675	18.3172	35.507	14.9842	13.4313	42.6674	0.172004	41.6363	11.9136	46.4501	388.013	91.6754	0.896366	24.445	121.443	6.12133	297.796	980.59	3595.61	2747.72	2968.79	486.415	10.1192	9.59607	302.907	6.55652	1.6829	280.564
Med143	2	2	79	20.99	2	8685.92	8.68592	17.245	40.965	16.9902	15.6732	41.2448	0	41.9512	12.5723	45.4765	352.09	99.146	0.922481	27.6833	106.878	10.5655	435.884	1153.33	3428.16	3067.73	2844.7	537.849	12.4312	10.8067	935.523	7.81917	2.23778	309.098
Med143	2	2	79	20.9637	3	6139.84	6.13984	25.426	31.8256	11.8583	12.543	41.2423	0	43.8251	14.7422	41.4328	340.531	59.5921	1.05774	24.8974	69.3094	5.61183	302.581	506.159	1503.25	2248.57	3141.78	391.839	8.85349	7.48554	247.156	5.47304	1.44661	271.947
Med145	2	2	71	27.3633	1	16415.8	16.4158	17.8757	29.8272	9.27924	10.6117	43.9203	5.50571	38.432	27.9616	33.6064	606.682	306.392	1.14359	40.0487	125.524	17.8379	345.232	2153.47	11167.3	4897.58	5224.62	1374.17	17.7151	19.2403	371.358	29.0215	4.15344	567.897
Med145	2	2	71	27.4286	2	11255.2	11.2552	18.3013	21.3442	9.38894	7.14154	49.9496	8.95623	36.4981	15.5181	47.9838	253.302	170.022	0.760634	36.5245	181.696	11.8031	366.527	1426.7	6527.62	3631.08	4552.24	1532.25	15.3825	17.9908	265.329	7.59678	1.06745	491.309
Med145	2	2	71	26.5044	3	8986.23	8.98623	17.4658	26.711	10.4997	10.1138	49.9624	4.92658	40.9139	16.6112	42.4749	237.396	160.611	0.963247	28.0696	89.0712	11.9158	226.387	934.62	4064.27	2248.29	3952.55	1134.68	10.9609	8.89708	67.6294	8.54974	1.08735	385.528
Med146	1	1	81	25.2635	1	8545.75	8.54575	14.9615	30.9496	12.1061	11.8265	44.5265	5.59679	41.938	15.1326	42.9293	241.44	95.4553	0.976909	29.3253	235.874	8.3214	536.321	1095.95	5744.57	1818.89	3234.38	528.702	11.6814	11.4271	193.112	8.44776	0.998169	340.207
Med146	1	1	81	25.6016	2	9796.33	9.79633	19.9658	38.0604	14.1908	23.5568	39.1859	2.18825	44.8448	15.5511	39.6041	275.5	104.18	1.66001	25.5458	195.246	13.3595	500.11	690.849	2162.47	2312.41	3308.32	1178.07	11.9773	13.3707	249.111	13.1314	1.28354	451.501
Med146	1	1	81	25.5021	3	9072.13	9.07213	19.3988	28.2556	7.88033	12.3315	46.0306	5.39051	47.0382	22.9025	30.0593	189.579	105.22	1.56485	41.3283	131.387	12.7032	594.132	900.739	4854.58	1742.47	3927.7	609.635	13.4022	11.3974	302.553	13.372	1.14202	504.601
Med147	1	2	74	27.5134	1	12943.8	12.9438	14.0669	38.8276	16.6454	14.1828	34.0842	8.52167	39.3004	14.5753	46.1243	382.335	147.619	0.852056	26.8097	164.94	12.5899	368.93	1416.5	3957.76	3088.44	4738.59	915.529	21.412	15.2927	278.597	15.2864	2.12816	473.282
Med147	1	2	74	27.4124	2	9222.1	9.2221	16.7497	32.6572	12.9054	12.7859	40.0358	8.2196	42.4346	14.7341	42.8313	310.761	116.656	0.990737	27.2941	122.543	6.98715	335.905	764.33	2345.69	3134.97	3509.05	706.438	14.144	14.3816	231.279	9.4838	1.10467	471.368
Med147	1	2	74	27.1369	3	7697.73	7.69773	18.0754	35.2788	14.602	14.0812	35.3876	8.62312	42.8232	12.7697	44.407	361.058	107.393	0.964334	13.7476	118.565	5.84797	539.928	640.245	968.646	2557.92	2996.27	804.84	15.0401	10.2495	96.7048	7.42669	0.759188	362.214
Med148	2	1	67	25.5751	1	9057.98	9.05798	19.4636	41.6238	11.1927	17.5839	32.4923	2.43322	45.7562	25.1187	29.1251	149.024	90.9454	1.57103	34.7645	174.699	19.6553	421.958	2535.09	14463.9	1572.08	4419.59	1131.28	15.849	15.9359	1149.64	19.6141	2.72158	605.209
Med148	2	1	67	24.8255	2	9060.1	9.0601	18.3897	47.1688	8.7994	27.5334	31.5168	2.02806	56.9564	23.367	19.6766	184.139	83.0402	3.12901	37.5785	161.969	25.6621	562.928	3265.88	19476.5	1397.95	4744.86	832.498	15.0104	12.4109	1326.78	22.69	1.39898	531.621
Med148	2	1	67	24.8886	3	8831.43	8.83143	17.1971	53.4825	10.2701	29.3194	27.1099	1.06097	58.0518	21.6137	20.3346	133.173	72.3791	2.85483	30.7989	145.695	26.7732	424.645	2553.72	15325.4	1929.22	3761.5	738.991	15.3413	11.7553	1682.45	22.8698	1.45816	511.962
Med149	1	1	75	27.0776	1	8329.46	8.32946	17.7585	26.8972	11.0635	9.90584	38.8112	11.1697	39.3256	16.753	43.9214	156.811	93.812	0.895363	25.2575	136.324	8.51016	293.624	753.684	3316.3	1613.1	3251.31	717.384	12.4245	11.0387	55.7251	8.58975	0.753062	405.142
Med149	1	1	75	26.3875	2	12340.9	12.3409	19.432	41.9896	11.0459	10.5109	34.7839	3.22596	51.0264	21.0899	27.8836	274.041	133.509	0.95156	37.5409	116.973	20.8913	424.895	1590.39	9076.53	1565.48	4407.39	907.118	16.9404	14.0445	1923.87	23.5816	2.05053	612.936
Med149	1	1	75	26.6444	3	7409.73	7.40973	20.7916	28.8606	7.38768	12.3629	31.4813	14.9867	46.2092	26.1776	27.6132	208.206	54.7799	1.67345	27.4524	120.9	12.1479	313.713	410.77	1966.32	1721.49	3770.29	555.252	12.2142	13.8643	227.72	12.2669	1.3396	424.494
Med150	2	1	71	29.993	1	6683.34	6.68334	22.2505	33.6858	14.0509	12.3936	40.3612	0	38.7941	17.2241	43.9817	209.83	84.4514	0.88205	22.945	72.731	6.47078	226.382	555.318	2651.24	1428.63	2937.9	860.838	11.2337	12.1494	87.8006	9.12456	0.65768	358.289
Med150	2	1	71	28.434	2	8669.72	8.66972	21.7082	34.2394	10.1802	0	43.0178	0	46.4626	21.9231	31.6143	153.597	105.776	0	31.9508	90.2797	14.2462	432.872	668.836	2677.28	2481.76	3371.63	1032.28	12.9176	9.84685	1835.39	13.5191	1.01932	427.626
Med150	2	1	71	27.8675	3	7028.52	7.02852	21.9151	37.9464	10.6067	16.7093	38.8023	0	46.839	23.4287	29.7323	135.37	92.7982	1.57536	23.0994	75.0709	13.3622	437.027	741.496	3397.07	1376.42	3292.82	1042.47	9.91815	10.7036	238.88	14.2829	1.33498	395.621
Med152	2	1	72	35.974	1	7314.18	7.31418	16.3668	31.5084	9.0704	12.7058	48.5222	0	43.8128	24.9102	31.2771	237.27	101.771	1.4008	23.8119	71.496	10.1085	415.609	335.084	455.091	1626.21	2578.98	985.258	11.7156	8.82695	57.0633	13.1594	1.3622	377.107
Med152	2	1	72		2
Med152	2	1	72		3
Med154	1	2	69		1	12828.9	12.8289	14.0123	40.1908	14.8541	15.158	39.6585	2.17302	41.0919	18.6401	40.268	518.422	155.442	1.02046	46.7042	123.849	16.1427	752.139	1211.76	2801.09	3198.17	5298.97	1021.57	21.1344	15.2984	882.497	20.3823	2.31612	590.572
Med154	1	2	69	32.0959	2	10122.5	10.1225	19.2205	30.0963	9.38345	13.1953	42.2163	4.60357	47.5036	18.7158	33.7807	189.483	143.865	1.40624	49.6527	161.797	9.18421	338.526	1041.87	5058.57	2094.77	5048.99	737.635	27.2896	21.9393	892.654	11.2777	1.2523	566.176
Med154	1	2	70	32.1004	3	7359.57	7.35957	17.3631	27.0573	11.5356	10.0693	45.8611	6.98417	40.7988	12.4616	46.7397	166.165	107.364	0.872894	24.8974	216.393	8.95031	274.983	931.271	4246.14	1600.86	3679.81	609.981	18.1803	12.4209	590.315	4.51515	0.784265	332.353
Med155	2	1	77	26.3277	1	7718.97	7.71897	14.0661	39.5948	17.2256	10.6192	43.0438	0	29.6929	22.1416	48.1655	191.968	64.2807	0.616476	26.31	68.9586	8.53477	394.78	1218.64	3065.25	2525.59	2883.01	903.378	9.46707	7.78187	226.806	14.4514	2.03852	361.952
Med155	2	1	77	26.6373	2	7763.57	7.76357	13.9067	41.7322	11.5083	22.981	40.2286	2.36674	56.6715	14.106	29.2225	134.076	110.003	1.99691	31.2174	122.352	17.1963	394.464	1311.95	6731.35	1791.68	3135.55	823.183	10.8699	8.06782	283.007	10.5161	1.10327	303.532
Med155	2	1	78	26.282	3	5364.6	5.3646	18.9371	29.5871	7.41697	15.1692	46.6779	3.42512	53.3045	20.6323	26.0632	60.5085	78.0405	2.0452	23.0282	108.679	9.35375	321.166	692.165	3665.14	2049.36	2931.35	827.162	9.1238	6.74632	154.724	7.62822	0.794163	305.63
Med156	2	2	67	25.9676	1	8978.95	8.97895	23.5386	29.6695	13.4267	10.1006	41.5094	1.84097	37.1191	13.5385	49.3424	345.694	112.67	0.752277	24.194	92.6783	11.3417	471.185	1807.23	9084.22	2673.71	3836.75	1100.64	12.4077	11.7913	543.087	6.60063	1.76445	394.31
Med156	2	2	67	25.3316	2	8157.45	8.15745	18.7343	33.7293	12.2166	13.4353	42.9306	3.57992	42.9746	17.9491	39.0762	341.694	92.1046	1.09976	21.4882	133.041	11.7539	254.724	1544.17	8261.41	2118.21	2944.53	753.442	8.76662	9.24698	302.211	10.7568	1.10202	345.911
Med156	2	2	67	23.96	3	6086.15	6.08615	18.0306	30.5475	10.4607	11.2321	43.0801	6.77643	40.2827	22.2013	37.5161	293.339	98.9951	1.07374	12.7623	88.3046	9.65822	187.325	422.528	1368.75	1224.79	2645	740.641	5.53493	6.95799	123.058	8.70706	1.41453	331.406
Med157	1	1	66	24.6103	1	10005.1	10.0051	17.6348	35.6297	14.9371	13.4966	43.0252	0.875932	40.3295	15.0368	44.6338	261.152	130.233	0.903564	26.3914	96.1045	9.73565	370.09	1184.35	4402.58	3324.47	3465.26	1069.59	14.9742	14.9092	85.4282	10.2557	2.16773	369.37
Med157	1	1	66	23.8548	2	9303.36	9.30336	18.4337	39.8866	11.3137	18.4619	40.552	0	51.6587	17.8654	30.4759	318.634	126.758	1.63182	29.0725	156.019	14.3357	670.79	1264.33	5416	2473.13	3805.32	1144.04	15.5776	13.7782	473.393	14.6965	1.78883	374.43
Med157	1	1	66	23.4201	3	9089.7	9.0897	14.967	44.0749	10.594	24.3561	38.9417	1.33883	58.8016	15.6219	25.5765	179.007	82.9559	2.29904	27.7061	104.475	16.1605	512.136	917.989	4011.75	2059.12	3128.56	732.431	13.7072	10.8152	307.124	14.423	1.19263	362.834
Med159	1	2	67	23.1216	1	10281.7	10.2817	18.8882	25.9409	11.5003	8.40314	50.7743	0.00444237	36.0266	14.6686	49.3048	195.016	124.092	0.730691	39.9592	223.586	7.48368	743.081	2744.54	13819.3	3553.6	5274.33	1888.2	19.3172	16.8089	55.7578	8.54546	1.50199	552.6
Med159	1	2	67	23.0796	2	8341.6	8.3416	22.9114	33.4997	13.5345	12.0394	42.2732	0	39.7745	15.5115	44.7139	173.438	113.219	0.889534	25.7192	114.949	9.12299	584.398	608.354	1885.44	2190.33	3687.29	1678.82	15.9169	16.8586	261.372	9.35389	1.17901	463.178
Med159	1	2	67	23.2107	3	9929.98	9.92998	21.6361	33.9255	13.4823	13.8692	42.565	0	44.9503	11.3536	43.6962	416.766	153.454	1.0287	35.5612	300.718	12.3903	627.923	1210.33	4271.54	2342.35	4544.94	2008.4	14.2072	17.2437	167.894	8.1179	1.3006	466.987
Med160	2	2	65	34.9268	1	7399.02	7.39902	21.9561	32.9573	11.9759	12.4318	40.046	1.65557	41.2127	19.0859	39.7015	300.318	84.2421	1.03807	24.6487	71.0882	10.564	364.011	842.552	3755.78	1764.63	3216.73	995.071	10.579	10.537	1400.79	8.73209	1.10816	335.509
Med160	2	2	65	35.0552	2	6451.79	6.45179	21.0103	30.0105	11.3471	10.9044	45.8916	2.1935	40.0461	18.2821	41.6717	161.789	83.1862	0.96099	26.6935	112.239	8.30802	605.28	870.302	4153.58	1787.68	3367.83	801.408	12.8089	10.69	1274.5	6.63798	0.871017	380.993
Med160	2	2	65	35.4418	3	9388.26	9.38826	16.6535	40.2338	19.5356	13.2692	39.9585	2.56384	35.4879	12.265	52.2471	259.103	136.593	0.679232	24.5648	57.9151	9.51839	352.68	699.443	2021.16	1773.66	3202.26	1005.04	14.8121	14.208	887.211	9.7489	0.961991	412.842
Med162	1	2	65	27.125	1	9616.79	9.61679	16.8486	34.8426	14.7275	11.9961	46.2896	0.00201037	38.2744	14.7364	46.9892	206.431	128.171	0.814537	26.5107	38.2829	10.6853	318.753	1085.01	4995.52	1701.42	3267.42	762.596	10.5907	10.869	258.12	13.4709	1.2153	368.975
Med162	1	2	65	28.2256	2	10528.4	10.5284	19.3488	36.3396	17.5642	11.7628	43.7446	0	34.7892	13.2634	51.9474	314.594	138.645	0.669702	33.2806	88.0043	10.3551	381.419	505.563	1306.01	2019.26	3483.41	839.451	16.3203	17.3669	164.483	11.5868	0.984717	435.57
Med162	1	2	65	28.2117	3	8170.43	8.17043	17.0799	38.5089	16.2251	12.8695	41.0934	2.75864	35.649	19.4068	44.9442	203.837	61.9446	0.793184	22.983	45.2946	10.1132	299.272	1010.44	4986.19	1733.74	2093.88	820.058	8.61132	9.61946	95.96	14.5589	1.01934	296.637
Med163	1	2	70		1
Med163	1	2	71		2
Med163	1	2	71		3
Med164	2	2	69		1
Med164	2	2	70		2
Med164	2	2	70		3
Med166	1	2	66	33.0889	1	8890.24	8.89024	19.8084	28.6604	10.4035	11.1341	43.2087	3.37944	42.0396	18.6792	39.2812	347.703	89.3615	1.07022	37.4051	122.326	14.4952	577.973	1048.03	4177.51	2314.65	3772.73	1193.8	12.875	11.422	1277.64	9.70579	0.757726	520.492
Med166	1	2	66	32.8956	2	12038	12.038	15.6681	40.3302	19.5066	14.464	40.7854	2.02559	37.9002	10.9865	51.1132	506.704	136.348	0.741495	38.238	157.475	11.8922	619.021	1118.87	3089.09	2651.4	3435.81	1084.63	16.4032	18.2849	183.412	9.97224	1.60274	505.6
Med166	1	2	66	32.7873	3	9439.46	9.43946	18.8363	34.2511	14.4018	12.2549	39.1573	5.67439	38.677	15.8704	45.4526	369.084	117.171	0.85093	23.2979	102.767	9.2083	331.267	1323.55	4837.23	2795.99	3804.57	1214.08	10.5894	12.4442	308.363	11.0698	1.23511	531.676
Med167	2	2	74	24.2916	1	7014.7	7.0147	20.2836	43.3777	14.5016	15.4035	33.0445	0.00214525	38.6717	24.9209	36.4074	448.781	85.3033	1.06219	20.3349	180.236	9.62839	343.428	785.81	2328.52	2347.49	3546.51	767.523	9.15462	10.8907	185.439	16.2667	2.32161	344.331
Med167	2	2	74	24.9733	2	5069.29	5.06929	28.2153	39.2457	15.5229	15.8807	31.4767	0	43.9778	13.0353	42.9869	418.658	54.0232	1.02305	12.3941	136.269	11.961	494.753	496.464	1380.57	1174.65	2507.54	676.89	7.88922	9.55015	149.392	5.4792	0.604074	278.234
Med167	2	2	74	24.2916	3	9842.27	9.84227	26.0885	49.7673	15.4597	21.8543	23.3145	0	46.9274	19.8761	33.1965	506.824	51.858	1.41363	22.0696	70.9322	16.0653	401.001	659.167	1738.22	3694.95	3566.67	941.929	11.5859	17.0113	225.454	22.5318	1.60281	447.435
Med168	1	1	72	27.2311	1	11294.7	11.2947	19.512	29.2877	11.3274	10.6642	36.6778	12.1316	39.4924	18.5596	41.948	487.081	136.225	0.941459	22.3268	116.183	11.6276	411.916	904.744	2491.44	3273.04	5023.42	1188.76	19.8336	14.8396	707.186	11.9588	2.00032	532.686
Med168	1	1	73	26.9508	2	7730.28	7.73028	19.2471	34.7968	5.75922	26.8542	32.577	11.6866	68.2849	14.0153	17.6998	145.03	56.5891	4.66282	32.8262	116.561	11.9963	258.442	908.586	5140.92	3081.92	4353.6	1043.12	17.7136	9.12699	1016.83	7.99408	0.506109	435.466
Med168	1	1	73	27.1262	3	9039.92	9.03992	20.2095	40.1806	8.22937	23.3812	30.8915	6.7825	61.9467	16.2502	21.8031	204.762	84.9857	2.84119	27.1803	190.073	17.6853	545.013	5971.08		3030.05	5319.29	1305.56	20.9162	12.4691	2387.13	11.0916	1.62573	497.019
Med169	2	1	70	27.0337	1	8908.13	8.90813	21.0201	36.2975	11.3032	16.0282	39.2968	0.0151743	47.4709	19.0523	33.4768	416.655	100.316	1.41802	26.6616	140.704	11.1026	508.458	833.657	2523.32	2989.7	3410.41	1133.18	13.7948	16.3982	175.786	13.2728	1.79512	441.995
Med169	2	1	71	26.7022	2	9942.27	9.94227	19.3593	37.8375	8.58143	14.8696	41.5367	0	58.2166	17.8566	23.9268	244.784	121.039	1.73276	40.352	208.85	18.7255	631.577	1315.17	6878.76	1551.33	4337.76	934.149	14.0583	13.241	341.031	15.6077	0.968191	482.638
Med169	2	1	71	26.835	3	11128.7	11.1287	17.115	34.4918	7.41511	18.0059	44.7069	1.02992	55.7049	21.3548	22.9402	274.165	163.266	2.42826	59.9196	176.312	23.6285	765.144	2110.05	11322.9	1967.41	4987.81	1023.03	19.5675	13.472	1462.25	17.1435	1.91965	539.897
Med170	2	2	72	28.439	1	10137.6	10.1376	19.5302	33.5258	15.7982	9.82986	43.4779	0	31.5105	17.8469	50.6425	289.36	114.161	0.622215	31.1298	175.408	10.6293	443.955	1334.54	5056.03	2512.62	4096.12	1451.04	14.2784	12.6188	227.405	12.7706	1.97257	472.304
Med170	2	2	72	29.0619	2	11532.4	11.5324	23.7969	30.4871	13.4982	11.1124	44.8224	0	39.9203	11.5888	48.4909	364.714	127.718	0.823254	34.7326	125.573	9.51579	499.314	2088.01	10813.8	2786.37	5592.05	1276.57	16.3857	20.1585	326.927	7.66029	2.12837	479.651
Med170	2	2	72	29.3888	3	12934.4	12.9344	18.4975	43.5833	20.9895	14.2463	36.881	0	36.0417	10.8569	53.1014	526.092	135.606	0.678734	35.3706	97.1913	13.4146	609.398	1932.27	7716.87	2886.98	5144.88	1583.85	15.6215	18.6775	249.184	12.7433	1.65421	573.535
Med171	1	2	79	24.4226	1	6964.6	6.9646	13.7036	34.9778	11.4701	13.796	47.6529	0	42.9092	21.4158	35.675	121.044	130.407	1.20278	21.7507	174.707	10.303	265.84	711.688	1921.69	1653.2	2711.65	762.622	7.93989	9.04295	345.367	11.2673	1.25807	261.828
Med171	1	2	80	24.5943	2	9120.84	9.12084	17.2129	39.477	11.8579	17.6153	42.3316	0	48.1853	19.3785	32.4362	198.531	128.328	1.48554	19.2287	194.039	14.1313	377.196	554.702	1284.29	2057.5	3049.68	509.676	11.1042	9.01184	88.3578	16.0476	1.06503	284.412
Med171	1	2	80	24.5861	3	10291.4	10.2914	13.298	42.925	13.4718	17.8061	42.6128	0	45.3426	20.3518	34.3055	245.238	143.229	1.32173	22.3258	348.249	15.4343	425.051	945.487	1919.28	2049.59	3737.07	811.761	12.0634	9.23683	519.044	19.7526	1.69687	342.369
Med172	2	1	67	25.2846	1	6134.13	6.13413	19.4441	34.8229	13.3165	13.7276	41.8805	0	42.8952	15.4942	41.6106	189.044	66.4488	1.03087	23.2871	123.651	8.07884	282.917	493.638	1298.25	2052.51	2116.88	654.067	8.63317	9.327	134.834	7.15539	0.896015	279.176
Med172	2	1	67	25.071	2	7374.22	7.37422	17.5162	41.4568	11.9743	11.335	35.8454	4.15285	52.1526	16.6973	31.1501	215.023	66.8029	0.946607	24.6732	70.0836	11.2302	298.904	601.323	2089.73	2246.34	2710.8	740.328	9.92551	9.44988	214.816	11.4656	1.09811	352.098
Med172	2	1	67	25.3323	3	5539.48	5.53948	21.3748	40.2743	7.70369	19.5835	35.2654	1.5318	52.741	26.512	20.747	140.826	59.1521	2.5421	23.8025	72.5565	12.6149	247.402	633.227	3815.84	899.525	2554.03	552.964	8.9099	7.11007	982.762	12.6315	1.15307	319.909

## Sheet: 4. nutrient intakes per MJ
TABLE S1.4 MEDLEY RAW DATA, NUTRIENT INTAKES IN GRAMS/MJ
StudyID	Gender (1=Male, 2=Female)	Diet allocation (1=Med, 2=Hab)	Age (y)	BMI (kg/m2)	Visit	energy_mJ	cholesterol_mg	sugars_g	dietary-fibre_g	vitamin-c_mg	vitamin-e_mg	total-folate_µg	total-vitamin-a-equivalents_µg	beta-carotene-equivalents_µg	sodium_mg	potassium_mg	calcium_mg	iron_mg	zinc_mg	long-chain-n3_mg	f18d2n6-linoleic_g	f18d3n3-linolenic-(ala)_g	magnesium_mg
Med001	2	2	68	23.6055	1	8.50028	28.1474	12.5759	3.98973	30.1537	2.32174	52.5081	55.9314	149.572	312.129	417.654	113.994	1.71867	1.07197	13.1076	1.31644	0.139976	52.343
Med001	2	2	68	23.3464	2	5.72783	78.3586	7.70864	3.28661	12.4251	2.2664	52.1031	86.6582	367.455	228.474	484.721	107.393	1.82519	2.04363	197.126	1.6621	0.16332	59.0366
Med001	2	2	68	23.7683	3	9.44813	46.2563	6.05286	3.64005	18.1474	3.68986	37.511	235.951	1379.51	193.071	488.992	100.367	1.58356	2.07574	139.287	1.73577	0.114173	57.9432
Med002	2	1	66	21.8688	1	8.22222	46.9087	14.0536	2.40687	18.9354	1.20461	42.0125	130.858	615.865	177.848	457.994	148.759	1.31106	1.08125	199.213	0.961571	0.102308	54.8839
Med002	2	1	66	21.4341	2	8.91341	31.4023	9.69302	2.85021	19.2394	1.83137	39.4684	104.557	463.094	178.821	371.635	79.3986	1.19619	1.0779	14.7715	1.71014	0.180541	59.025
Med002	2	1	67	21.3599	3	9.48497	37.0095	7.66619	3.0069	17.9471	2.19573	37.429	116.813	650.092	205.487	388.76	78.118	1.54238	1.34416	32.7976	1.78345	0.145835	61.128
Med003	2	2	72	33.3428	1	11.6602	33.2013	9.23145	2.92275	5.05661	1.329	37.3599	103.159	483.267	222.891	373.972	92.21	1.54054	1.54259	32.8327	1.71657	0.121563	49.6353
Med003	2	2	72	33.0344	2	8.66257	33.5929	10.305	3.11837	6.80407	0.920045	24.4845	50.2485	156.889	275.643	405.008	115.324	1.30872	1.65682	22.843	0.942961	0.1072	47.6184
Med003	2	2	72	33.2353	3	7.85318	83.1895	14.3619	2.98761	18.8858	1.29355	76.491	0	579.375	230.525	468.677	131.959	1.77281	1.48864	54.0645	1.29195	0.107161	53.0369
Med004	2	1	78	33.2577	1	6.14989	39.7067	21.327	3.78504	13.8182	0.67266	50.6029	112.84	376.231	247.466	553.145	218.063	2.09051	1.36486	9.28232	0.572966	0.0831077	68.3726
Med004	2	1	78	33.1859	2	5.23012	18.9521	13.3565	4.97466	20.1087	1.10968	53.6161	123.543	564.54	331.754	545.848	110.34	1.88532	1.46907	102.925	0.976225	0.159819	57.5514
Med004	2	1	79	33.4657	3	6.54125	39.5792	12.836	3.1482	15.4532	2.14474	56.38	48.3519	180.914	231.162	350.833	133.864	1.62117	0.937051	76.8739	2.01883	0.190898	46.7064
Med005	1	1	80	26.5096	1	9.80747	73.0409	18.8716	3.07967	21.709	0.909567	47.6358	102.007	248.025	225.974	471.754	154.189	2.03015	1.1975	23.8602	0.683188	0.130614	47.3125
Med005	1	1	80	25.6952	2	8.585	12.9538	14.4328	4.78412	12.5254	1.1567	51.2415	104.64	418.127	334.293	452.353	108.897	1.67795	1.3239	89.4815	1.34355	0.184792	54.7957
Med005	1	1	81	25.7131	3	10.1509	28.8082	12.4281	3.84638	18.091	1.69146	56.5366	94.6436	315.528	220.408	315.105	97.1865	1.57908	0.97035	37.5899	1.58727	0.269182	39.6282
Med006	2	1	82	22.8865	1	7.65726	37.5127	11.3145	3.90622	13.2564	1.05403	45.7984	100.074	526.164	307.784	472.747	72.3797	1.94961	1.4062	13.238	1.85057	0.202688	63.2322
Med006	2	1	82	22.895	2	6.49206	37.1908	10.0549	4.16078	10.4864	1.31949	37.24	186.012	1147.21	196.468	494.474	80.3478	2.00348	1.31528	129.672	2.50337	0.118218	62.3861
Med006	2	1	83	23.0452	3	6.1937	38.1053	14.6448	3.85023	15.2461	1.72305	37.5346	352.12	2089.28	229.667	495.101	80.0541	1.58897	1.1748	39.328	1.38422	0.138729	43.7727
Med007	1	2	81	24.7133	1	8.26914	20.7687	10.1177	3.46485	10.4004	0.525195	45.1411	79.0468	399.821	208.521	429.259	91.1502	2.07007	1.60329	15.2909	0.764327	0.129368	50.3299
Med007	1	2	81	24.261	2	8.87302	41.9265	10.184	2.64599	2.29962	0.99093	59.7687	72.7184	241.869	199.806	386.628	84.8246	1.43455	1.56099	47.9792	1.14806	0.159937	49.3192
Med007	1	2	81	24.2846	3	10.9458	37.7075	6.96723	2.41184	6.92548	1.0045	41.1603	202.369	142.5	215.379	326.598	65.3532	1.24039	1.44411	16.4715	1.22826	0.130079	39.4426
Med008	1	1	75	25.48	1	8.67294	51.3234	7.76512	2.78693	11.3147	1.18942	62.0758	172.588	624.202	296.27	421.07	56.5228	1.34456	1.19036	21.1916	1.10727	0.103664	43.3134
Med008	1	1	75	25.2965	2	9.3444	27.509	10.8963	4.82931	13.9522	1.79489	53.2494	135.771	703.373	257.364	462.176	76.1661	1.56634	1.23931	214.358	1.44221	0.166068	52.804
Med008	1	1	75	25.163	3	8.07077	39.7008	12.5262	3.69186	15.3924	1.70143	60.1926	102.176	546.953	211.194	432.14	94.1181	1.48395	1.52984	235.929	1.34975	0.125713	52.1968
Med009	2	1	72	25.2923	1	8.6156	29.6781	10.3987	3.17042	15.777	1.17359	43.4479	99.0254	235.66	238.143	449.396	99.3807	1.08218	0.933701	36.6403	0.974418	0.174244	45.2354
Med009	2	1	72	24.8877	2	7.51996	27.7316	11.2017	4.856	12.3051	1.53234	43.1159	163.778	803.025	243.592	473.514	92.546	1.47412	1.27138	225.957	1.11874	0.172175	49.696
Med009	2	1	73	24.396	3	7.43587	37.2901	9.44934	3.42338	16.8857	2.08424	58.6521	106.571	589.986	184.097	425.286	95.7809	1.38711	1.41499	253.644	1.8398	0.188531	52.0816
Med010	1	2	82	34.0432	1	7.13707	38.7337	5.93881	3.53439	12.9038	1.84535	28.5668	126.456	734.718	147.077	465.297	43.6646	1.29826	1.03814	194.785	1.52921	0.162884	63.1871
Med010	1	2	82	34.2685	2	6.35927	42.7594	5.50205	4.34306	39.833	2.11003	49.389	218.535	1322.09	190.269	590.184	105.41	2.08326	1.92291	231.92	1.32508	0.133924	83.4488
Med010	1	2	83	34.053	3	7.06827	17.7636	7.80337	4.5305	15.9272	1.65795	43.9618	102.844	652.801	259.346	382.576	39.2679	1.59848	1.50032	142.451	0.979458	0.0938385	40.2431
Med011	2	2	76	24.996	1	8.11426	32.7251	8.73361	2.48768	6.42809	1.31785	24.4443	59.7108	336.717	228.266	283.205	50.1801	1.15646	0.844128	97.3471	1.91382	0.212828	34.4666
Med011	2	2	76	24.4752	2	10.448	20.7893	5.38537	2.94115	5.72604	2.50182	43.4323	67.6673	367.704	171.873	309.531	51.1988	1.23879	1.01495	169.965	2.71463	0.242972	36.0389
Med011	2	2	76	24.3304	3	7.55459	25.9888	6.23214	2.93508	10.661	2.09275	28.2959	121.731	628.286	178.461	375.096	59.657	1.27121	1.45649	30.7526	2.29199	0.242	38.6701
Med012	2	1	71	25.695	1	6.99108	23.0531	12.5467	4.75928	74.2851	1.73999	81.4788	103.938	470.405	204.5	637.675	120.697	1.49871	1.08536	116.843	1.27539	0.0833568	60.0415
Med012	2	1	71	25.7747	2	8.84517	12.3351	8.85506	3.66745	25.2954	2.49483	43.7092	103.614	609.47	238.609	381.333	56.9449	1.34348	0.88228	238.449	1.51128	0.103008	41.7329
Med012	2	1	71	25.5732	3	7.82709	22.04	11.5621	3.87221	24.4587	2.53692	44.0609	103.08	482.687	107.917	409.388	98.1692	1.47615	0.973248	141.391	1.29365	0.104098	40.9654
Med013	2	1	68	27.8883	1	8.43394	20.0192	14.4237	2.98486	13.1802	1.04026	50.1477	92.7997	364.643	238.562	433.692	152.07	1.47007	1.05914	6.43314	1.09263	0.222876	63.5269
Med013	2	1	68	26.7	2	6.96637	12.5329	10.402	4.78443	12.38	2.15759	48.9132	69.7947	394.148	221.806	491.534	93.8168	1.54901	1.23669	15.0248	1.90973	0.211026	61.4234
Med013	2	1	68	26.143	3	8.00275	39.2164	10.2696	3.83888	15.8267	2.18822	51.3301	91.3146	372.972	194.801	437.613	100.431	1.86404	1.73322	32.8602	1.72228	0.299152	54.1107
Med014	1	2	76	20.4246	1	7.2307	31.8238	9.31594	3.21114	17.435	1.26995	40.6629	148.842	785.475	155.222	493.137	68.6295	1.79381	2.07938	20.0216	1.30838	0.0671935	53.9393
Med014	1	2	77	20.4621	2	7.29436	31.9555	10.0309	2.74327	14.6879	1.09586	23.1394	109.889	488.112	216.213	443.864	72.3092	1.74091	1.58755	22.0864	1.12762	0.0947293	44.9541
Med014	1	2	77	19.8163	3	5.50404	55.5176	9.65855	2.98942	5.65971	1.09494	28.9964	151.989	547.687	244.523	376.112	83.9262	1.4348	1.67501	21.4251	0.93469	0.1452	40.1524
Med015	2	1	68	26.6966	1	5.80129	31.0917	16.2473	3.71841	18.145	1.02974	51.9905	198.511	1061.69	260.865	435.516	91.8054	1.27394	1.48888	12.6704	1.13562	0.138339	43.2444
Med015	2	1	68	25.91	2	5.90135	38.143	11.5896	4.81921	27.7878	1.59691	77.3441	220.365	1153.81	192.715	476.312	125.23	2.12243	1.69324	39.5426	1.34934	0.1514	51.9111
Med015	2	1	68	26.1108	3	8.36355	21.5068	9.60393	4.21165	6.41531	2.10081	39.3147	91.1428	475.753	158.635	320.536	125.984	1.44085	1.26817	7.23602	2.39888	0.262827	46.6743
Med016	1	2	74	25.1843	1	9.45441	37.8856	14.6183	3.17647	18.3585	1.3094	45.983	125.852	471.471	253.96	446.752	127.804	1.49604	1.19694	145.534	0.858967	0.121676	50.9561
Med016	1	2	75	25.0284	2	11.2127	33.1071	11.203	2.46257	13.1984	1.17645	37.4584	72.5743	266.566	195.569	492.061	109.326	1.6425	1.89105	19.8001	1.08626	0.098706	56.968
Med016	1	2	75	25.2305	3	11.526	38.3541	11.1688	2.40848	9.19317	0.904998	40.4835	77.5534	292.426	176.189	370.984	81.4804	1.59161	1.68802	36.6464	0.901178	0.13243	49.6632
Med017	1	1	76	30.033	1	7.98391	35.772	8.81818	3.18119	5.82587	0.770564	102.288	74.3974	303.682	365.661	299.101	82.7816	2.69044	0.826959	18.073	0.812674	0.111152	30.725
Med017	1	1	76	30.033	2
Med017	1	1	77	30.0759	3	8.73776	10.2372	12.4055	2.87578	34.4712	1.83048	56.389	99.0107	559.943	172.338	307.673	107.718	1.16187	0.755341	41.1266	1.56448	0.147759	38.8462
Med018	2	2	66	20.2989	1	9.59442	22.0068	10.5589	3.32542	10.3235	2.67405	37.9073	61.125	169.561	217.517	375.738	122.494	1.23295	1.13552	104.337	1.76816	0.101385	54.9906
Med018	2	2	66	20.0196	2	7.75388	23.6345	11.3386	3.31299	11.777	1.85942	42.0717	84.636	403.696	271.633	420.277	124.461	1.35383	1.24896	7.46219	1.41887	0.106257	57.2173
Med018	2	2	67	19.4243	3	7.9288	20.328	10.8869	4.49929	17.0522	1.13233	46.8738	118.028	596.99	288.813	472.248	138.281	1.78756	1.32762	46.6338	1.23218	0.151595	54.5325
Med019	1	1	73	30.013	1	13.4858	32.5408	12.9868	2.48092	7.13119	1.23399	84.5354	105.117	290.045	294.472	388.384	169.135	1.35023	1.47322	0	1.09391	0.144883	48.126
Med019	1	1	74	30.451	2	12.5415	25.855	16.8156	3.59392	8.37028	1.43407	40.4428	144.753	731.074	323.864	395.204	121.744	1.24198	1.06014	8.00523	1.26362	0.125709	43.5679
Med019	1	1	74	31.1609	3	13.4645	15.7385	15.6287	3.60609	20.4415	1.85429	67.2122	76.6958	213.865	258.286	364.362	140.382	1.60395	1.17321	48.1509	2.02637	0.242593	44.5237
Med020	2	2	65	28.9673	1	8.05138	42.9235	10.3581	3.51113	14.7892	1.12362	52.6079	141.683	588.407	219.302	450.152	111.059	1.47275	1.77838	15.5006	0.836011	0.107308	56.4752
Med020	2	2	65	29.1884	2	6.58127	72.8482	7.71675	3.32766	11.0265	1.15965	167.88	0	379.519	224.764	452.734	75.845	2.89561	1.86119	227.538	0.951917	0.221456	51.1705
Med020	2	2	65	28.9831	3	6.69468	42.6134	11.5553	2.96232	21.5015	1.0364	63.8051	82.5348	261.851	399.074	427.55	136.77	1.53248	4.43656	37.4182	1.03742	0.246001	54.0877
Med021	1	1	65	22.051	1	12.2049	26.3639	8.14258	4.13172	6.08548	4.27608	40.4021	36.4113	177.633	180.143	418.048	89.5041	1.85778	1.30947	136.957	2.49504	0.0804228	70.6175
Med021	1	1	65	22.0763	2	10.0721	28.2417	12.0518	3.87727	20.4592	2.31462	60.5202	189.185	277.337	184.336	415.838	138.716	1.5843	1.33618	150.146	1.46487	0.141411	48.087
Med021	1	1	65	22.2476	3	10.8524	27.3612	11.2653	3.4471	12.3523	2.03379	27.1275	117.493	671.871	195.666	411.104	83.1402	1.53393	1.02444	159.933	1.61159	0.158117	40.4184
Med022	1	1	71	28.8683	1	10.2559	46.8503	17.5437	2.37428	21.6851	1.04802	43.8887	100.364	456.542	209.488	449.269	155.511	1.73422	2.91861	179.037	0.725184	0.107656	54.7096
Med022	1	1	71	28.0863	2	10.0338	29.0603	10.9558	2.89082	23.2816	1.67625	44.0052	102.409	429.216	185.124	388.241	77.8367	1.17391	1.01646	13.7974	1.41049	0.161612	54.0896
Med022	1	1	71	28.031	3	9.55374	42.4607	11.7615	2.50272	21.919	1.41648	46.9376	100.881	527.582	211.379	386.361	91.5891	1.68263	1.45332	46.0913	1.30201	0.157401	59.4421
Med023	1	2	68	22.2771	1	7.51189	13.736	11.5469	3.07962	27.3275	0.488076	44.4515	85.8012	488.581	180.344	455.739	57.3359	1.19928	1.09994	38.1684	0.875288	0.0609093	43.4361
Med023	1	2	69	22.348	2	12.5162	26.711	11.3728	2.55075	33.6738	0.89096	45.0265	96.7674	332.554	200.628	388.306	114.973	1.06462	0.995447	0	0.689816	0.0747592	45.7443
Med023	1	2	69	22.419	3	5.80137	40.2033	9.89568	2.55121	13.7697	0.950046	31.5493	1252.84	252.048	294.179	345.767	116.714	2.07823	1.41952	25.5382	1.1114	0.121948	41.742
Med024	2	2	76	34.9632	1	9.6687	43.6991	11.9289	2.33844	9.47688	0.586025	76.1586	367.802	456.804	314.006	562.865	197.381	1.45473	1.91904	16.364	0.658352	0.114183	78.243
Med024	2	2	76		2
Med024	2	2	76		3
Med025	1	2	68	34.3212	1	7.13518	18.7003	10.4605	4.47643	15.1977	0.985275	44.9986	38.9233	109.682	250.012	414.26	101.297	1.72277	1.22113	23.0593	1.27246	0.174063	49.3955
Med025	1	2	68	33.8276	2	10.7948	18.5843	7.0852	3.39955	9.57937	3.49058	44.048	92.9004	458.171	282.636	372.439	117.168	2.42708	2.07893	8.81674	2.3324	0.0837291	60.9016
Med025	1	2	69	33.8722	3	8.21365	66.0179	5.88446	3.14897	8.62796	1.35052	57.2063	57.2765	64.5275	215.204	316.56	42.7755	1.53162	1.65168	39.1062	1.63238	0.157355	45.2728
Med027	2	2	67	19.3092	1	8.15638	13.1206	17.0594	3.39883	30.045	1.28219	57.569	134.646	581.917	245.36	459.427	164.63	1.43102	1.1668	4.13285	1.02527	0.245036	57.2649
Med027	2	2	67	18.5219	2	8.46997	24.9172	11.5152	3.19327	22.4485	0.756426	47.9864	74.3877	189.571	316.275	543.688	142.252	1.576	1.40269	19.4885	0.742193	0.194915	55.5888
Med027	2	2	67	19.1703	3	7.40939	19.1871	12.3767	2.91909	21.9841	0.980671	111.779	124.644	659.888	268.855	469.22	175.108	1.36273	1.74239	10.1833	0.863021	0.127787	59.4853
Med028	1	1	72	27.2508	1	11.1038	30.3513	6.54876	3.40465	17.2013	1.41771	46.2835	66.0203	265.227	488.122	467.074	59.7757	1.52553	1.69319	37.4646	1.99481	0.145604	58.9508
Med028	1	1	72	27.1811	2	11.4891	27.5485	13.2343	3.68153	13.2175	1.69128	60.8206	75.3656	309.13	232.756	413.119	149.987	1.31425	1.33777	37.3816	1.46599	0.104583	62.1997
Med028	1	1	72	27.2613	3	11.5342	39.3568	8.62314	3.5459	10.4913	1.85944	49.3381	48.8844	108.99	234.361	410.317	103.34	1.56529	1.48655	43.1131	1.89525	0.22437	45.4432
Med029	2	1	67	17.9716	1	13.55	51.8949	8.78174	2.76419	7.37926	1.11374	37.3029	129.028	510.827	299.763	382.285	130.506	1.18765	1.41632	51.3308	1.3549	0.0817015	64.3798
Med029	2	1	67	17.9716	2	11.4317	36.9703	12.5035	3.36631	16.7139	1.58885	55.7043	84.9967	303.448	267.927	439.693	154.911	1.23378	1.35486	68.7159	1.39008	0.112487	68.1762
Med029	2	1	67	18.2063	3	9.29241	34.1423	9.25134	3.29686	18.5138	1.94679	48.1739	45.9591	134.298	231.147	418.671	110.945	1.4787	1.35498	81.0822	2.01342	0.215784	47.5417
Med030	2	2	77	24.9922	1	8.66132	45.4225	12.8371	5.24725	35.8464	1.61724	63.3609	193.51	1018.92	482.74	553.831	113.824	1.78388	1.47792	228.673	1.56788	0.185885	55.2103
Med030	2	2	77	25.3191	2	6.86244	38.7126	14.8022	4.48679	22.0919	1.71252	43.5298	174.504	850.239	222.428	529.019	129.307	1.41953	1.16519	195.593	1.26522	0.275015	56.0908
Med030	2	2	77	25.2595	3	7.07229	26.7743	14.5362	4.71894	25.9228	1.45546	47.6056	286.024	1637.8	385.335	538.752	125.04	1.58406	1.393	41.4712	1.6317	0.150175	50.1503
Med031	2	1	65	32.7613	1	9.03217	39.0194	16.5697	2.75681	12.6714	1.04626	49.0591	223.947	778.238	317.63	456.316	110.817	1.60537	1.59098	11.6583	0.658756	0.138394	45.4287
Med031	2	1	65	32.4823	2	7.6568	26.8781	8.22798	4.16623	16.7172	2.11577	62.3498	165.97	883.711	210.427	473.514	96.9987	1.69784	1.46275	154.268	1.55417	0.195904	50.047
Med031	2	1	65	32.841	3	8.8746	22.2771	10.3216	3.15507	10.885	1.84797	41.5681	187.546	945.44	171.67	350.788	83.215	1.35217	1.0254	165.878	1.99446	0.304239	42.2554
Med032	2	1	74	21.456	1	11.1276	25.9811	16.2548	3.18483	8.76927	1.07832	30.3547	148.85	775.262	133.109	429.784	115.75	1.44729	1.96395	14.8344	1.98611	0.147681	61.3481
Med032	2	1	74		2
Med032	2	1	74		3
Med033	1	2	65	25.493	1	8.27022	56.778	17.1269	1.69698	25.4675	0.772919	48.4957	105.675	108.789	153.466	458.966	118.323	1.90895	1.20521	16.4458	0.88993	0.142895	45.4839
Med033	1	2	66	25.3347	2	9.59441	45.5068	12.3908	1.70366	5.7216	0.787303	27.1868	71.129	106.233	204.58	361.636	123.238	1.18184	1.1819	7.17987	0.967496	0.122596	33.1249
Med033	1	2	66	25.5506	3	8.6375	48.4992	8.52926	2.23692	9.10984	0.877961	35.5013	68.6081	174.292	250.931	435.852	102.218	1.4406	1.17388	52.7035	0.71807	0.112981	40.2661
Med034	2	1	69	24.9499	1	8.1198	42.3334	7.23097	4.01371	19.485	1.53356	66.1366	367.321	2286.45	205.191	521.629	75.7198	1.98637	1.38162	88.7738	1.70165	0.231237	59.5506
Med034	2	1	69	25.6539	2	8.36543	32.604	6.94868	2.83093	13.7813	1.5252	35.1426	91.9034	416.433	208.455	456.164	79.1739	1.78585	1.91517	86.3237	1.46115	0.198241	52.0739
Med034	2	1	69	25.4302	3	7.29206	36.4401	5.01523	3.43774	16.5439	2.44886	92.0438	66.5397	332.296	185.619	425.913	70.1567	1.89035	1.09955	0	1.36658	0.129174	45.9904
Med035	1	1	68	29.0673	1	14.995	25.9205	9.58718	2.82375	6.09517	1.68583	57.7861	101.604	420.105	271.539	378.094	98.8887	1.59282	1.36862	6.45269	2.14506	0.0908626	61.4297
Med035	1	1	68	28.7353	2	10.5723	17.8809	11.4705	3.5403	20.1716	2.04086	61.1447	40.5798	203.968	151.562	483.032	123.697	2.05011	0	130.706	1.60333	0.0816938	64.953
Med035	1	1	68	28.5696	3	13.5591	13.0726	12.3675	2.66614	12.0188	2.5567	29.7468	106.433	590.443	189.025	371.283	109.025	1.26895	0.921052	79.8117	1.6524	0.131497	43.4467
Med036	1	2	70	27.9786	1	8.71469	33.2127	8.89315	2.65108	8.36766	0.585062	29.8351	115.607	506.219	386.575	283.724	109.391	0.940485	1.04847	15.2222	0.88175	0.139315	36.7624
Med036	1	2	70	27.7556	2	8.37656	32.2168	8.75847	3.83783	8.50137	0.978483	36.7999	108.684	460.374	404.516	331.218	128.011	1.43786	1.50121	17.1598	1.19629	0.153158	47.5788
Med036	1	2	70	27.4267	3	6.23475	18.5152	8.33231	4.06416	7.58794	2.13968	37.2851	38.8778	156.969	311.553	364.231	88.7454	1.76929	1.48896	9.4945	1.7709	0.135849	50.6491
Med037	2	2	66	24.6652	1	7.95735	22.2035	19.0164	3.87824	9.84001	1.11223	51.0164	119.708	357.492	272.973	475.062	158.357	1.09723	1.23647	19.6173	1.40853	0.294586	60.0374
Med037	2	2	66	24.0215	2	8.17578	39.8194	17.8881	3.55309	14.4762	1.78288	45.2856	117.01	341.406	184.232	425.693	117.707	1.0008	1.03924	20.2032	1.02621	0.228232	54.463
Med037	2	2	67	24.1009	3	8.29845	55.7001	17.3482	4.02108	17.6358	1.43262	41.0337	193.329	703.121	184.789	435.012	132.563	0.975937	1.02738	13.8297	0.966517	0.168736	45.2361
Med038	2	1	65	24.4514	1	6.8843	36.0202	14.9943	3.34023	17.4391	1.29762	38.2565	116.873	540.704	356.957	517.338	193.739	1.40763	1.86196	22.8051	0.984506	0.109954	66.3666
Med038	2	1	65	24.4514	2	8.12967	14.336	11.7053	4.03677	22.2603	2.17605	53.8504	145.402	840.215	218.457	527.918	113.605	1.48574	1.22527	157.903	2.15007	0.0897568	60.2019
Med038	2	1	65	24.5212	3	8.65859	14.7918	15.5621	3.82903	16.1208	1.94258	47.4173	111.911	629.241	160.271	502.647	130.742	1.38336	1.01024	49.2041	1.79212	0.16718	58.14
Med039	1	1	66	26.7803	1	9.19694	22.0152	11.1193	3.72381	13.8865	1.57442	81.6792	64.9444	285.737	221.938	428.295	73.3971	1.49992	1.25038	21.2837	1.8574	0.194983	60.0165
Med039	1	1	66	26.1983	2	10.835	10.2145	10.4066	4.35481	21.1982	1.52354	59.6939	40.701	157.529	228.569	384.398	116.581	1.67177	1.22007	52.8311	1.49128	0.16124	52.2137
Med039	1	1	66	26.532	3	8.80507	11.8495	11.1233	4.7581	20.5052	1.99193	48.7648	157.725	876.779	197.602	437.515	115.946	1.59325	1.53792	52.2877	1.74578	0.279546	48.313
Med040	1	1	76	25.0173	1	12.8522	27.0647	9.15552	3.59627	11.3501	1.18619	39.407	92.8044	333.343	193.191	372.907	130	1.63476	1.53496	134.483	1.89848	0.16973	56.3653
Med040	1	1	76	24.2336	2	11.5261	13.4405	12.845	3.82817	22.4025	1.30993	57.5953	52.4871	245.703	200.547	383.222	119.587	1.72159	1.34931	16.8622	1.56676	0.190803	50.2115
Med040	1	1	76	24.4839	3	10.2956	15.7854	10.6774	3.51618	4.27185	1.96704	46.5952	73.8727	329.87	180.781	326.365	112.23	1.17333	0.91663	22.7391	2.02499	0.189794	44.1216
Med043	1	1	69	29.8404	1	9.8286	33.8602	13.42	3.58041	10.9384	1.43505	46.1093	118.439	557.036	321.912	390.037	107.22	1.7517	1.16329	8.62297	1.01383	0.164483	40.9196
Med043	1	1	69	29.694	2	8.67496	19.1054	12.6229	3.99387	21.7285	2.52874	49.7398	178.3	1121.37	144.976	415.733	55.9325	1.54393	1.07407	17.7199	2.02768	0.132886	50.1219
Med043	1	1	69	29.7552	3	7.40453	36.6525	10.2385	3.7517	15.3255	2.67112	52.2271	81.2922	329.763	174.06	351.324	71.4606	1.71549	1.04957	182.391	1.8766	0.216616	46.3786
Med044	2	1	67	29.8624	1	10.723	37.4899	12.5404	3.25064	14.5492	1.28666	59.517	122.079	518.974	298.483	384.912	140.561	1.42948	1.3021	11.4738	1.09597	0.196654	42.1665
Med044	2	1	67	29.0551	2	9.69793	38.1195	11.7005	3.89656	18.3816	2.05922	54.3069	173.125	1017.34	197.606	464.564	101.207	1.3773	1.29356	18.4358	1.53575	0.129436	48.1589
Med044	2	1	68	29.4597	3	7.90304	29.7806	9.92011	3.69369	10.3984	2.29441	58.4593	81.8879	340.959	212.902	338.659	107.779	1.40099	1.05987	170.064	2.31439	0.251231	40.1614
Med045	1	1	68	24.6182	1	6.76332	26.8426	18.0695	3.12361	11.676	0.941611	99.2019	134.315	518.695	211.996	474.147	97.8585	1.83473	1.96657	33.5075	0.993018	0.120552	51.8113
Med045	1	1	68	24.5469	2
Med045	1	1	68		3
Med046	1	1	67	28.6108	1	12.1479	68.7064	12.6904	3.20963	16.0387	1.10026	40.1881	98.5988	239.787	268.137	407.107	112.175	1.44103	1.57438	38.5554	1.05302	0.198199	47.1931
Med046	1	1	67	28.1867	2	12.8541	12.7712	11.8521	3.81511	22.8821	1.81337	42.7418	134.298	808.041	137.066	419.92	63.2185	1.11707	1.01304	42.4299	1.49377	0.107762	45.7462
Med046	1	1	67	28.0928	3	10.0393	16.387	10.8617	4.72504	22.4783	1.46113	46.3613	89.4937	562.631	153.452	493.438	92.4893	1.47803	1.15591	27.0985	1.42331	0.11845	56.0605
Med047	2	2	72	26.7165	1	6.98077	32.5615	10.5123	3.47153	17.9862	1.52514	44.41	143.973	755.395	197.279	512.358	69.2943	1.8846	1.98345	19.4288	1.48569	0.0817837	54.1364
Med047	2	2	73	26.358	2	7.17602	36.5147	11.1994	2.71511	17.0155	1.05881	24.179	108.546	493.407	201.276	457.027	55.1591	1.67028	1.5786	26.4689	1.07799	0.100448	41.1415
Med047	2	2	73	26.2074	3	5.62354	54.4028	9.50675	3.0202	6.75436	1.0497	31.9786	148.427	533.787	316.669	384.643	85.1506	1.40989	1.66034	20.95	0.910303	0.143943	39.3502
Med048	1	2	65	29.7884	1	6.53636	42.2492	5.00808	2.21979	4.73807	1.92869	30.1663	49.5613	135.343	302.556	300.37	66.5504	1.19854	1.14037	50.6923	1.47099	0.101786	42.8525
Med048	1	2	66	30.1659	2	8.11088	65.1725	7.12381	3.14376	9.75915	1.97244	32.7454	99.1009	522.652	267.509	408.63	44.8026	1.53041	1.5373	39.5011	1.90458	0.229409	45.3673
Med048	1	2	66	30.0151	3	4.89313	34.99	8.64773	2.87352	5.23566	1.60743	40.0493	53.592	250.242	278.186	403.326	59.59	1.61477	1.94368	64.172	1.2236	0.137347	50.272
Med049	1	2	66	24.403	1	8.60112	26.721	15.4767	2.64175	16.7605	0.872824	37.661	133.078	294.909	182.69	454.397	91.6677	2.5353	1.62664	64.2848	0.963638	0.169816	49.1638
Med049	1	2	66	24.363	2	12.5267	32.337	13.5606	2.91218	8.2281	0.704643	35.877	87.8772	85.8141	272.363	374.993	108.909	1.83682	1.65716	26.3851	1.34495	0.244413	44.0529
Med049	1	2	66	23.7753	3	10.6288	23.0675	15.219	3.09149	16.3363	0.865306	30.4801	98.6743	370.874	239.616	360.011	81.7455	1.41739	1.76712	13.2151	1.25176	0.146961	42.0746
Med050	2	2	70	24.9968	1	7.06919	24.1081	17.8451	4.4101	16.9034	1.08448	61.4782	83.9452	434.276	318.664	527.84	138.907	1.58788	1.65229	36.9607	1.73743	0.244365	51.1499
Med050	2	2	70	24.8522	2	6.94441	38.2714	17.8565	3.68631	14.9731	1.24254	56.0407	136.478	671.031	298.626	485.301	126.677	1.5655	1.51969	68.6974	1.50798	0.199104	48.8827
Med050	2	2	70	24.8802	3	8.52276	14.001	13.8027	4.60995	28.4067	2.2865	68.0267	163.807	944.083	299.097	513.07	100.54	1.53433	1.24685	14.989	1.9969	0.129992	58.2964
Med051	2	2	72	42.625	1	8.63906	53.714	12.256	2.02372	6.5028	1.05365	51.6995	91.4832	203.118	363.468	364.613	85.1936	1.36841	1.07775	41.8719	1.18704	0.173136	37.3475
Med051	2	2	71	42.4049	2	5.42422	43.3636	12.1513	2.82345	20.4424	1.0998	48.2803	170.5	676.674	399.1	483.637	139.114	1.46314	1.38702	27.091	1.07446	0.13925	42.6281
Med051	2	2	71	41.5396	3	7.43742	32.027	8.39148	3.42165	11.9492	1.04974	75.7834	145.478	593.464	317.69	460.301	124.808	1.41112	1.26319	34.9243	1.10077	0.169441	42.3596
Med053	2	2	66	32.5513	1	7.10044	71.3027	9.14699	2.18494	18.6088	1.22767	26.3609	60.6493	76.0644	341.017	398.207	124.584	1.51495	1.09561	68.453	0.822774	0.235482	40.7465
Med053	2	2	66	32.4682	2	9.03923	65.1118	17.3077	2.67062	19.6787	1.06462	38.5633	175.847	796.436	284.232	452.446	81.134	1.18984	1.22706	87.4948	0.694841	0.0843013	44.9524
Med053	2	2	67	32.1898	3	8.65771	49.1531	12.0213	2.47349	20.8227	0.861552	37.1091	216.838	1060.99	171.66	435.92	119.433	1.56672	1.63448	18.518	0.49078	0.101688	47.0843
Med054	2	1	66	35.5566	1	7.99909	45.1847	9.42623	2.07293	18.1346	1.25775	52.2812	138.012	674.182	217.464	396.042	87.8083	1.74234	1.58459	0	0.687322	0.132885	37.5047
Med054	2	1	66	35.2212	2	6.26087	54.3052	11.2555	3.44422	24.978	2.08785	58.9701	185.43	900.534	323.105	569.276	118.618	1.76869	1.44662	369.489	1.40907	0.20005	46.5088
Med054	2	1	66	35.219	3	11.3901	25.4238	10.616	4.11281	19.3201	2.05728	55.2435	103.002	525.602	234.078	458.658	104.166	1.6173	1.29392	25.0188	2.43162	0.249727	49.6104
Med056	2	2	77	25.0386	1	10.4218	37.5897	11.7646	2.53816	10.044	1.42658	35.3228	59.1733	118.929	247.278	410.4	83.2247	1.31126	1.24845	11.6986	1.14787	0.217811	42.758
Med056	2	2	77	23.8798	2	7.37806	28.5635	12.0301	3.29173	22.611	1.71698	34.2625	129.551	639.826	380.684	500.305	101.391	1.5152	2.06191	17.6927	0.919563	0.0805489	47.8004
Med056	2	2	77	23.9685	3	7.40968	29.6325	13.5954	2.73241	26.1203	1.79332	45.0751	95.9545	427.035	174.331	541.477	87.6469	1.49883	1.96697	17.9358	1.21011	0.0851634	52.8892
Med059	2	1	70	24.8482	1	9.49362	13.9712	19.5172	5.35366	39.7498	1.35212	63.0492	278.332	1581.91	336.281	700.609	137.935	1.82023	1.76175	3.74567	0.724852	0.20914	55.8705
Med059	2	1	70	24.9289	2	6.72965	12.6472	11.2168	5.36039	34.9494	2.4478	85.1889	138.292	752.732	283.477	550.196	128.722	1.70049	1.37172	119.107	1.3051	0.145893	48.8841
Med059	2	1	71	25.0658	3	7.0922	25.9762	8.85562	3.1104	22.5513	2.30106	60.1963	438.849	2792.67	194.566	443.069	103.678	1.37492	1.26146	229.492	1.31285	0.169703	47.4859
Med060	2	1	65	29.5455	1	8.57226	39.118	11.4028	2.7936	9.10762	1.0387	33.1254	130.913	548.615	347.779	364.11	75.4824	1.83273	1.41165	10.443	0.922692	0.129811	45.8349
Med060	2	1	66	28.7712	2	9.09831	13.9187	11.7572	5.87169	24.2104	1.88666	59.7759	107.067	596.669	291.775	479.318	75.3198	2.36847	1.61106	214.744	1.08757	0.164355	52.3022
Med060	2	1	66	28.6179	3	7.50508	30.0619	14.8637	4.00798	19.7256	1.27698	45.4443	141.604	719.471	156.503	463.965	90.5361	1.6612	1.63486	13.3029	1.62515	0.196462	42.9309
Med061	1	2	70	29.7531	1	10.9138	55.662	6.18238	1.84327	6.82524	1.18997	92.4677	81.9329	236.579	418.879	379.96	66.6271	1.45908	2.36701	38.0575	1.27234	0.200114	35.8228
Med061	1	2	70	29.537	2	7.10428	23.7862	11.3349	2.51982	2.68793	0.334326	79.306	41.6663	44.9447	314.002	317.265	124.813	1.07407	1.20877	29.2335	0.743599	0.0811037	43.4909
Med061	1	2	70	28.9146	3	5.87539	49.6676	8.05972	1.82832	10.2473	1.37227	35.5866	109.864	148.922	207.817	373.551	114.293	1.99654	2.53405	32.4981	1.13305	0.295036	38.5199
Med062	2	1	72	25.4097	1	8.05072	24.9504	14.7375	3.97634	28.3341	1.78771	42.6251	126.666	725.992	336.52	439.574	70.6441	1.15762	0.851178	4.79116	3.63154	0.535096	32.5038
Med062	2	1	72	25.4097	2	8.81558	14.0142	13.9191	3.7664	20.6873	2.09454	43.8482	167.999	1016.8	317.984	405.333	91.3381	1.43568	1.25974	40.9547	1.58783	0.12638	41.2635
Med062	2	1	72	25.4886	3	10.1969	23.6487	12.1779	3.41566	30.7806	2.16009	33.3139	85.8177	448.415	315.053	461.384	112.221	1.4416	0.956142	36.6288	1.85727	0.208358	35.4497
MED063	2	2	74	22.7384	1	9.0228	32.7321	17.3764	3.12837	10.6966	1.03389	50.9664	240.051	1180.53	167.935	487.163	169.58	1.10908	1.22252	102.573	1.04191	0.125147	47.0406
MED063	2	2	74	22.1039	2	7.0831	25.0198	21.8071	4.43067	18.2231	1.33265	53.1361	248.558	1249.69	228.289	569.216	171.543	1.37348	1.31948	17.5891	0.690734	0.0799964	64.7571
MED063	2	2	74	22.042	3	9.26839	30.7553	17.419	3.76176	10.2185	1.39708	36.9251	253.48	1334.31	180.819	474.808	119.417	1.04614	1.05147	120.197	0.891429	0.113995	44.981
Med064	2	1	76	27.1589	1	6.26534	20.2761	12.794	3.96253	18.4456	1.15684	62.5171	75.4546	307.937	220.091	430.762	129.283	1.49283	1.30236	285.357	1.09711	0.0987491	56.4022
Med064	2	1	76	26.8101	2	8.95948	15.061	9.53502	2.87543	13.2488	2.11876	54.5181	32.9096	153.81	163.974	344.759	79.7401	1.43811	1.03232	30.8968	2.18626	0.150367	47.4639
Med064	2	1	76	26.7335	3	8.48429	9.46665	6.15095	3.11594	10.5944	1.94629	43.418	203.267	1188.14	191.474	323.848	71.3995	1.32507	1.1815	3.94061	2.29283	0.180327	45.4419
Med065	2	2	69	22.0829	1	8.35024	51.9109	15.4361	4.35741	35.8243	0.98271	102.445	158.373	720.308	207.914	593.658	133.977	2.22999	1.63825	11.0226	0.936219	0.122152	80.109
Med065	2	2	69	22.021	2	8.28546	28.6651	17.625	3.2796	25.8559	0.873904	68.2355	61.7515	254.404	243.332	481.11	118.196	1.80662	1.87729	23.7682	0.716473	0.121694	59.8967
Med065	2	2	69	21.2003	3	8.17426	21.18	18.2898	3.12463	13.8005	0.711163	70.2905	98.482	314.74	257.67	518.103	159.727	1.42668	1.18421	3.21793	0.8071	0.120293	69.215
Med066	2	1	66	33.6229	1	10.0033	32.5412	12.8189	2.45384	7.29628	1.41506	35.9433	35.5566	56.6906	240.236	376.15	59.4588	1.34263	1.67009	22.7275	1.98311	0.297212	31.5278
Med066	2	1	66		2
Med066	2	1	66		3
Med067	2	1	74	24.3882	1	6.73547	39.7421	13.4095	2.85238	23.8551	1.39304	80.7647	136.297	699.071	194.692	493.747	153.726	1.40716	1.14226	162.403	1.08427	0.11828	52.7547
Med067	2	1	74	23.858	2	7.41115	40.8326	12.7295	4.95644	28.6204	2.02541	70.364	261.88	1596.53	181.976	576.189	135.889	1.78251	1.41341	180.537	3.39407	0.527447	66.4677
Med067	2	1	74	23.8039	3	8.85524	29.5603	10.8993	4.46711	23.5326	1.92325	68.4631	298.003	1797.16	176.762	509.128	132.901	1.68066	1.38822	171.092	1.51362	0.0956273	58.5105
Med068	1	1	78	25.8361	1	6.82167	25.6117	14.2845	4.51884	26.3131	1.25872	71.4186	167.667	978.643	302.257	648.825	186.744	1.44728	1.46995	4.85951	1.58453	0.150184	71.4717
Med068	1	1	78		2
Med068	1	1	79		3
Med069	2	1	72	28.4287	1	5.83229	28.4492	10.6753	4.53533	30.1412	1.36625	69.0133	194.145	1128.21	321.335	569.259	143.237	1.47938	1.46752	5.79086	1.81495	0.170461	57.3204
Med069	2	1	72		2
Med069	2	1	72		3
Med070	2	2	70	32.5733	1	8.94187	31.2467	11.8492	3.21249	23.05	1.70595	40.3992	158.56	839.443	165.355	451.737	112.783	1.17378	0.919128	0	0.911252	0.143627	46.7771
Med070	2	2	70	33.4808	2	12.4333	31.7187	9.74502	3.78088	16.6804	1.91367	58.1097	171.137	787.965	163.949	414.55	147.095	1.27105	1.30045	133.197	2.15849	0.247235	63.1507
Med070	2	2	70	33.8572	3	10.3516	44.7843	9.21224	3.17625	11.5986	1.64648	27.9022	128.688	581.462	342.014	387.592	106.673	1.32357	1.10008	0	1.46518	0.1764	47.7787
Med072	2	1	65	22.6342	1	7.81408	41.7367	11.2537	2.39096	7.88608	1.55479	42.2252	108.491	524.33	216.461	570.015	149.844	2.39656	2.29434	132.564	1.19685	0.128802	55.8548
Med072	2	1	65	22.2336	2	8.39647	24.5377	12.6322	3.04176	14.6688	1.96078	43.9415	122.456	603.474	217.997	446.883	98.4079	1.32568	1.03319	10.1238	1.57427	0.111672	49.6247
Med072	2	1	65	22.4974	3	8.12762	25.4811	11.4413	2.95226	10.4609	1.72329	47.8568	83.7273	418.497	161.767	377.65	74.0904	1.68461	1.52671	60.7469	1.89322	0.210512	44.2776
Med073	2	2	75	23.4362	1	6.96173	40.8473	9.4764	3.60694	11.4278	1.60668	62.9044	93.7776	345.368	339.694	479.291	125.665	1.54303	1.43106	0	1.50095	0.26811	47.9237
Med073	2	2	75	23.345	2	6.51079	29.9097	12.188	4.71291	12.146	1.35466	58.3728	172.055	850.272	336.66	488.441	125.289	1.617	1.22408	260.175	1.06241	0.231558	51.6087
Med073	2	2	75	23.6909	3	7.69695	30.7931	10.2549	4.03909	12.2578	1.42573	64.0524	167.859	771.106	311.697	365.585	103.133	1.44241	1.03175	18.8029	1.45167	0.40342	39.6967
Med074	1	2	68	25.8843	1	4.48098	23.0599	12.3528	3.05258	6.60864	0.547274	70.55	118.263	440.414	284.356	302.618	133.844	1.92989	1.79581	36.6402	1.02158	0.178269	35.1693
Med074	1	2	68	26.474	2	5.11623	25.4376	10.1024	2.55157	2.36471	1.03826	70.4422	74.5192	197.37	292.443	311.995	177.617	1.08946	1.49467	34.331	1.53131	0.104935	40.7253
Med074	1	2	69	26.4359	3
Med075	1	2	82	31.2324	1	9.50441	16.0376	10.1081	3.61597	8.33364	0.892229	43.642	93.2453	384.238	266.145	322.191	93.2553	1.12639	1.06817	9.84469	1.52722	0.182734	48.1819
Med075	1	2	82	31.2421	2	10.2253	30.2469	10.977	3.52705	11.2419	0.898234	32.3615	77.7529	176.968	158.589	456.606	91.891	1.28163	1.18571	60.4793	1.08281	0.0743848	54.7299
Med075	1	2	82	31.5987	3	10.7386	15.5547	11.6807	4.51694	7.38399	0.811828	41.3042	156.766	855.64	215.707	405.646	121.992	1.41833	1.6201	30.3065	2.52795	0.241062	51.8566
Med076	2	2		27.2872	1	5.61593	56.25	9.23817	5.33614	22.377	2.24919	71.4089	228.858	1348.84	258.897	621.774	97.3166	2.23403	1.63671	88.7718	1.68644	0.142352	71.9922
Med076	2	2	65	27.7968	2	9.0865	48.64	6.61727	3.16951	5.06064	1.88884	33.8915	68.8177	138.896	183.042	372.604	68.7592	1.70783	1.28955	27.3075	2.18494	0.181262	55.3421
Med076	2	2	65	27.1356	3	5.47626	45.2898	7.27876	4.08186	13.9339	2.43835	49.4799	58.2451	243.856	223.661	499.216	91.6622	1.91064	1.5069	124.322	1.86742	0.114215	57.0262
Med077	1	1	79	22.637	1	11.8101	10.1571	14.7736	0	39.2485	1.26458	149.69	266.426	1460.11	252.83	1094.8	136.121	3.71651	1.81606	7.68757	1.56117	0.201213	84.4118
Med077	1	1	79	23.1983	2	13.6615	19.0567	7.56995	4.84353	15.6739	2.13942	44.6549	72.3088	332.759	152.683	416.116	104.055	1.52662	1.2966	65.9437	2.68717	0	71.9477
Med077	1	1	80	23.4452	3	13.0922	13.2994	8.54163	5.13818	14.2714	2.19539	41.0029	43.1089	192.579	179.521	402.125	97.9495	1.95687	1.44149	118.56	2.9668	0.89317	68.3425
Med078	1	2	77	30.5021	1	12.1762	17.9779	15.688	3.36176	19.0396	1.13263	54.5311	68.3622	238.292	204.81	435.558	166.839	1.09766	1.06894	14.3679	1.92836	0.19591	60.0733
Med078	1	2	78	29.3586	2	11.3135	30.2512	9.01186	2.96659	12.9309	1.51653	41.9641	43.7004	118.731	175.144	321	71.53	1.06553	0.849737	4.17918	2.94668	0.271486	47.2114
Med078	1	2	78	28.304	3	9.06529	12.4409	12.2842	3.36621	9.22413	1.06651	39.6441	103.135	448.629	223.185	412.801	134.29	1.60246	1.25546	2.65019	3.09873	0.291692	79.5222
Med079	2	2	79	27.2932	1	9.13504	19.3837	13.8641	3.57298	23.2112	1.00123	67.6306	62.9887	215.407	275.526	362.136	115.453	1.00464	0.858727	20.0267	1.46234	0.191409	38.5066
Med079	2	2	80	26.1102	2	10.1607	37.7345	10.0088	2.64988	15.3512	1.18202	42.7934	54.4348	157.167	266.902	302.484	83.7787	0.774932	0.671726	5.78114	1.2446	0.129193	27.9369
Med079	2	2	80	25.2673	3	6.49827	15.2258	18.2599	3.2603	14.17	1.01281	40.0192	127.263	572.886	304.252	473.121	172.147	0.883717	0.978457	5.27878	0.640471	0.118165	40.592
Med080	1	1	67	27.5055	1	9.59153	38.9201	12.9336	4.88272	25.1328	0.624892	76.8343	153.367	725.08	371.421	351.304	77.3476	1.5571	1.37123	12.4621	0.837825	0.120001	35.5515
Med080	1	1	68	27.9979	2
Med080	1	1	68	29.0017	3	6.82979	35.3709	10.3989	2.26857	12.1044	0.932403	57.9787	54.599	241.027	106.001	534.291	88.6838	1.59453	1.16252	39.4634	0.826448	0.107978	48.8701
Med081	2	2	72	28.7428	1	7.34612	33.2896	10.2179	4.05097	15.471	0.921439	36.8113	151.752	670.336	233.36	427.954	75.1966	1.53469	1.29629	13.4198	1.06937	0.141768	50.0168
Med081	2	2	73	28.1828	2	6.0311	54.4338	9.98752	4.22491	13.8881	1.40478	53.4743	53.7231	136.001	168.438	468.4	96.5109	2.03359	2.11407	87.0459	1.07608	0.0830548	60.6458
Med081	2	2	73	28.1646	3	10.0027	20.4682	9.01732	4.01874	12.8943	1.58193	50.4739	96.6911	474.039	211.486	356.753	91.6707	1.76997	1.30667	18.8057	1.4523	0.118254	58.5226
Med082	1	2	69	27.6421	1	8.95731	24.8003	7.84696	2.45595	10.897	1.64362	53.8413	115.053	667.497	190.106	409.921	50.0523	1.17416	1.30422	232.737	1.58334	0.0804834	40.6016
Med082	1	2	70	27.0037	2	5.77569	34.6371	6.9174	2.42976	22.0966	0.667015	27.7935	164.016	725.745	265.009	389.256	93.1537	1.41815	1.39146	33.9991	0.63809	0.0873034	39.4424
Med082	1	2	70	27.5783	3	8.76686	50.6827	8.00494	1.35184	13.2974	0.813947	26.4916	92.9074	369.129	352.602	362.539	66.965	1.37853	1.61569	24.4862	0.690047	0.0908782	35.7081
Med083	2	1	77	26.5794	1	6.92625	51.0063	8.69148	3.21261	12.8278	1.0726	76.5426	167.025	678.096	251.029	427.053	151.065	1.66282	1.58766	170.179	1.03565	0.135543	47.2144
Med083	2	1	77	26.0544	2	6.00739	25.2392	11.2984	4.66975	24.2645	2.03723	78.9257	232.574	1352.07	279.826	519.465	111.982	1.98344	1.36482	414.682	1.26602	0.118614	58.3748
Med083	2	1	77	26.7986	3	6.69085	27.316	9.41751	3.58975	28.9813	2.50212	92.301	193.655	1058.42	196.553	506.284	104.044	1.57967	1.03092	0	1.31021	0.134752	47.5513
Med084	2	1	68	25.092	1	6.60597	9.97959	10.2144	5.25013	20.5714	1.18457	61.1311	109.164	587.848	301.644	515.161	81.0791	1.96379	1.47886	6.92656	1.4442	0.108169	55.7051
Med084	2	1	68	25.4845	2	6.66011	17.0657	11.1256	3.6362	5.80846	1.21756	59.6903	99.8245	421.966	322.039	360.125	121.729	1.38154	1.38072	16.5738	1.25621	0.191776	42.3234
Med084	2	1	68	25.1803	3	6.23065	26.0175	11.215	3.91731	17.0762	1.52231	71.5842	50.5027	252.303	179.949	523.872	125.377	1.80349	1.52712	53.2691	1.5555	0.121588	62.7536
Med085	2	1	68	34.0289	1	8.25067	39.7958	15.1709	3.69559	30.9164	0.630267	83.8075	187.718	997.567	299.068	438.649	78.3904	1.58208	1.50442	13.8412	0.889215	0.161119	37.0234
Med085	2	1	68	33.3286	2
Med085	2	1	68	33.7534	3	8.11291	22.6096	15.17	2.2533	18.3262	1.61926	48.2531	50.8867	119.979	166.015	269.79	74.4066	1.02922	0.65271	26.0444	1.31596	0.18703	28.2695
Med086	1	1	66	24.3616	1	8.33148	34.6887	13.0419	2.90538	9.93758	1.00245	40.7819	140.88	669.461	268.803	489.513	78.04	1.91241	2.16039	16.3054	0.81054	0.110137	49.9479
Med086	1	1	66		2	9.89006	34.9829	10.253	2.22507	12.1011	1.03437	42.5954	93.0107	323.062	265.706	364.897	89.7428	1.48855	1.71304	11.7304	1.09046	0.0948769	36.4857
Med086	1	1	66		3
Med087	1	1	86	19.1716	1	13.4191	26.9053	13.3377	3.77707	15.4486	0.963812	49.6923	146.956	582.873	141.7	396.009	65.4442	0.906261	0.906571	14.8591	0.985807	0.158791	36.3194
Med087	1	1	86	19.3094	2	8.01209	19.5009	19.9507	4.22963	14.1933	1.05357	45.5618	114.53	602.759	196.28	404.819	83.9314	1.11432	1.06904	147.54	1.47643	0.199953	42.3759
Med087	1	1	86	19.2219	3	9.9582	23.0509	12.8688	3.05536	38.1116	1.59206	66.4991	88.8434	400.266	247.591	418.982	102.88	1.18461	1.08807	168.275	1.15381	0.145516	45.3372
Med088	2	1	67	22.7334	1	8.93335	36.1768	15.6923	2.88936	18.8571	1.41553	46.4779	76.7088	201.033	198.613	374.814	115.145	1.27199	0.943371	208.79	1.85362	0.394748	43.4272
Med088	2	1	67	22.5973	2	7.16676	35.7305	10.7833	3.69591	13.5539	1.91089	44.4181	108.734	491.036	364.247	416.484	79.8065	1.44976	1.02339	86.8503	1.43974	0.175618	42.9396
Med088	2	1	67	22.3514	3	6.95349	34.673	17.6355	3.45882	18.2218	1.29597	40.9057	132.942	620.691	205.494	439.41	108.433	1.24779	1.0332	34.2685	1.4626	0.135348	50.0101
Med089	2	1	65	22.0985	1	6.8037	39.1246	11.1889	4.0257	15.9827	1.46919	47.5883	177.206	870.41	244.251	435.847	98.8626	1.42948	1.22488	150.246	1.77471	0.0961284	50.4397
Med089	2	1	65	21.742	2	10.3793	56.5502	8.67368	2.30382	11.373	1.91226	38.9246	62.399	192.18	98.0709	388.204	69.1276	1.19157	1.12728	30.9677	1.84041	0.108706	46.9139
Med089	2	1	65	21.4925	3	9.63899	43.8029	8.04104	3.53876	13.5696	1.88086	58.5254	96.0176	352.96	130.423	423.348	66.4112	1.25225	1.06067	83.1143	2.06847	0.124729	50.4482
Med090	1	1	65	27.5131	1	7.77195	18.6501	16.0826	3.33688	8.20949	0.473193	30.3722	98.1784	356.088	303.157	321.802	74.8539	1.27866	0.975583	4.53487	0.785637	0.126169	42.8579
Med090	1	1	65	27.7163	2	7.4024	22.8979	13.4064	3.45814	15.0887	1.10895	44.1318	125.387	527.819	259.891	448.456	132.154	1.25103	1.01343	19.0148	1.05947	0.101904	51.1536
Med090	1	1	65		3
Med091	1	1	68	21.8672	1	10.7645	51.4502	10.5882	3.78904	21.7909	0.967762	60.9645	63.7782	181.11	313.834	459.757	123.473	1.70508	1.23491	33.3981	0.907327	0.134486	48.7859
Med091	1	1	68	21.5971	2	12.7157	22.6628	10.7624	3.50484	11.2547	1.37363	47.5024	150.842	732.855	178.085	434.2	98.8388	1.6416	1.37017	33.3752	1.26081	0.149979	53.3194
Med091	1	1	69	21.9991	3	13.3299	18.9833	9.27128	3.73668	14.1793	1.8351	82.7549	124.547	628.844	291.396	427.642	111.646	1.62968	1.3568	51.0981	1.94692	0.131335	62.2484
Med092	2	2	69	29.1312	1	6.73979	37.5858	12.5884	4.56308	8.05861	0.700777	84.1252	190.057	853.96	332.944	496.824	114.648	2.00577	1.87004	17.9314	0.769019	0.183513	51.5894
Med092	2	2	69	29.0063	2	10.1142	28.6966	17.0511	4.76848	17.9517	0.889889	49.5222	137.772	577.971	273.859	521.586	96.0934	1.62418	1.12698	7.16042	0.87488	0.157483	43.2374
Med092	2	2	69	28.705	3	6.51511	24.2675	14.8705	3.00977	8.65907	0.911271	110.539	52.7928	149.779	286.269	373.716	86.8619	1.38935	1.28993	38.9833	0.95853	0.218243	36.1356
Med093	1	1	76	26.9284	1	7.23813	32.2266	8.21371	3.22851	10.748	0.967295	61.4038	75.403	203.314	336.009	331.187	93.7405	1.54335	1.08476	66.4426	0.758105	0.115351	41.5316
Med093	1	1	76	25.4977	2	7.89292	32.5191	9.78339	4.19014	15.6953	1.88314	68.3029	136.374	726.511	209.078	478.04	83.0831	2.04168	1.54596	35.6671	1.57666	0.121318	58.0094
Med093	1	1	76	25.0767	3	8.76794	20.7845	10.7165	3.03876	23.3837	1.62206	84.3721	94.8762	473.231	333.812	452.911	101.248	1.61822	1.12507	89.7191	1.5482	0.138765	51.9707
Med094	2	1	74	29.5381	1	5.4851	31.7794	9.75876	3.33695	10.7957	0.899638	45.4129	78.6573	257.978	300.174	366.315	90.8203	1.70669	1.06001	46.2067	0.798222	0.114448	45.1295
Med094	2	1	74	28.0849	2	6.8244	36.1591	9.1966	3.56078	13.4803	1.79099	67.9344	119.787	634.833	185.021	480.432	92.3657	1.81119	1.58713	38.29	1.62134	0.104702	55.3952
Med094	2	1	74	27.5083	3	7.07638	25.7287	11.7091	3.038	21.7821	1.54223	87.7587	119.41	628.101	235.484	480.649	114.911	1.67712	1.20405	53.6895	1.55913	0.119307	55.9853
Med097	1	1	75	31.354	1	12.2903	25.4706	10.3874	5.43435	13.6683	1.31483	79.2568	173.603	1010.94	228.663	457.349	84.0073	2.66882	1.65468	102.669	1.55786	0.180558	55.2905
Med097	1	1	75	31.5139	2	10.3086	35.8289	10.3786	4.67447	8.29488	1.44736	81.6502	70.9685	213.509	264.008	449.749	132.493	2.38383	1.81273	15.6488	1.49102	0.0814929	65.5683
Med097	1	1	75	31.6047	3	5.25923	6.24054	14.1641	6.65581	13.3955	1.30428	95.5104	174.532	949.41	263.743	569.006	143.48	2.83751	1.71077	2.15989	0.910784	0.0699053	76.0206
Med098	2	1	70	25.189	1	7.92004	29.6944	12.5087	4.02843	20.1057	1.48622	38.2846	199.039	1143.55	219.099	468.418	113.104	1.44291	1.50453	140.269	1.32789	0.191121	46.7784
Med098	2	1	70	24.9696	2	6.91395	58.0168	14.68	3.51603	21.2666	1.52336	55.1462	167.49	667.517	329.791	583.915	152.641	1.74238	1.23923	167.783	0.709776	0.116505	61.8061
Med098	2	1	70	25.9121	3	7.67213	12.615	13.8986	4.19745	17.2347	1.57642	50.5595	158.42	813.689	199.756	414.574	125.656	1.49368	1.09831	59.0562	1.46195	0.0890247	51.6721
Med099	2	2	67	24.2858	1	6.95539	23.1572	13.57	4.37871	8.35704	1.29326	52.8975	160.12	710.302	270.365	459.76	157.374	1.61103	1.50628	42.4258	1.40041	0.439728	61.7268
Med099	2	2	67	23.9511	2	6.13965	44.254	16.1211	2.88238	18.1324	1.47941	41.667	84.3553	232.197	210.578	395.709	143.33	1.4541	1.05647	22.4283	1.18132	0.194544	42.3815
Med099	2	2	67	24.1166	3	7.34947	20.928	16.4881	3.4596	16.9374	1.13077	50.9381	77.2579	205.362	169.977	411.748	91.904	1.40968	1.19556	11.5623	1.34662	0.193599	46.9052
Med100	1	1	66	34.3021	1	7.48819	50.559	10.0225	3.52494	9.57263	1.01978	52.2808	85.688	333.582	483.934	388.459	98.0721	1.38787	1.36464	18.068	1.01763	0.125566	43.7764
Med100	1	1	68	34.1121	2	5.34319	26.8017	7.73452	4.79741	8.01914	1.44956	41.666	98.5347	459.778	661.636	473.095	98.1032	1.60176	1.56868	4.4655	1.49861	0.103021	54.6052
Med100	1	1	68	34.2964	3	11.4193	17.9354	8.98695	3.95704	12.0448	2.28714	52.9145	138.447	831.835	173.044	382.072	69.7483	1.18087	1.11333	58.5122	2.37295	0.0930484	51.8207
Med101	1	1	67	30.4278	1	7.76327	24.1464	16.9476	3.87734	35.881	1.49675	52.8473	174.332	748.571	250.354	355.232	74.8279	1.07141	0.698601	58.8631	1.06314	0.17508	35.5086
Med101	1	1	67	30.4221	2	6.41181	30.2349	11.6979	4.10107	25.1076	1.51175	75.4071	123.111	606.877	219.105	451.668	91.8093	1.59066	1.21301	38.8199	1.37355	0.125227	47.9273
Med101	1	1	68	30.9279	3	7.09091	44.8613	11.0322	4.53876	37.171	1.7925	64.1178	119.055	532.353	210.961	513.472	157.376	2.3535	1.42536	17.1811	1.68706	0.128139	57.5913
Med102	1	2	68	32.6348	1	8.7279	62.4821	7.57538	3.19088	9.8284	1.91902	51.0108	81.4128	282.537	318.842	381.51	70.0931	1.52492	1.45222	121.262	2.09582	0.10796	40.5974
Med102	1	2	70		2
Med102	1	2	70		3
Med103	2	1	77	28.7005	1	9.43785	41.5226	9.5656	4.65556	14.9544	1.34945	54.071	306.128	1686.44	209.605	452.26	108.212	1.64995	1.66802	54.3463	0.94426	0.112048	50.4337
Med103	2	1	68		2	10.4562	37.4552	7.12913	3.89359	5.03736	1.73567	58.6906	146.388	825.97	146.674	385.625	82.4218	1.35904	1.36781	136.738	1.84433	0.11325	54.3581
Med103	2	1	68		3	13.0826	39.1487	9.09182	3.34221	11.9371	2.1953	51.1209	188.975	1004.77	150.018	400.541	104.478	1.26964	1.14187	163.115	2.26642	0.0852649	49.4724
Med104	1	1	76	21.9671	1	7.19535	21.3366	17.0541	4.47474	16.1195	0.995387	75.587	92.01	366.565	252.922	433.872	150.02	1.66751	1.25243	37.394	0.870377	0.382112	47.0231
Med104	1	1	77	22.3796	2	10.9731	19.6936	12.5815	4.73479	14.622	1.15654	81.3905	124.015	579.137	257.802	394.947	125.375	1.56661	1.25321	15.7769	2.08995	0.129145	62.5561
Med104	1	1	77	22.1859	3	8.93708	21.6689	14.917	3.66444	18.5683	1.4758	63.801	41.1267	111.784	193.454	473.334	162.25	1.63973	1.4548	47.8037	1.28747	0.100563	64.9464
Med105	2	1	70	23.197	1	7.85272	27.9833	10.8827	3.86165	12.1159	0.767376	38.9544	170.575	938.073	300.211	497.068	60.4714	1.50868	1.61709	16.0544	0.762614	0.171612	39.2174
Med105	2	1	77	22.8949	2
Med105	2	1	77	22.6889	3
Med106	1	2	66	27.4272	1	4.88719	19.8132	17.845	3.58483	28.9474	0.744924	113.594	110.615	407.163	431.73	482.232	84.8698	1.29911	1.20656	68.1185	0.851547	0.115364	50.5529
Med106	1	2	66	27.4956	2
Med106	1	2	67	27.564	3	7.30727	41.8016	15.1677	2.90625	28.7966	1.44578	65.0826	88.8806	404.375	229.472	434.94	106.109	1.2709	1.12348	91.7212	1.34163	0.129236	47.1734
Med107	2	2	73	32.4764	1	9.80842	25.497	10.7071	2.56263	4.36076	0.916396	25.8596	77.2149	210.728	208.859	276.908	71.4514	1.16669	1.00038	21.3439	1.21777	0.179633	36.5406
Med107	2	2	73	32.2909	2	10.657	33.3996	11.0284	2.09252	5.3152	0.709457	26.8464	73.6628	99.6339	296.431	241.309	76.5149	0.905476	0.810008	21.1896	1.39093	0.142317	37.9486
Med107	2	2	74	32.3115	3	9.47762	32.1167	12.5151	2.37388	3.67776	0.721082	28.882	82.5947	106.662	310.339	292.972	67.6516	0.882613	1.02844	34.633	1.19406	0.151332	39.2255
Med108	2	1	80	19.5109	1	8.04948	26.5731	9.86156	3.80872	14.9755	2.00951	36.9526	150.379	572.604	225.478	396	104.206	1.37028	1.08104	27.1028	3.24133	0.242349	49.4045
Med108	2	1	80	19.2747	2	6.3209	21.5737	11.3318	4.26642	27.827	1.73867	57.0904	204.265	1066.34	331.685	461.844	117.584	1.37153	1.37695	61.3292	2.38388	0.181338	54.0086
Med108	2	1	80	19.1351	3	10.0955	22.5243	8.31297	3.12246	12.0287	2.21807	39.9872	92.4788	329.807	180.408	362.081	88.259	1.236	1.05821	78.4445	2.32807	0.261743	45.2756
Med109	2	1	69	27.9695	1	6.88095	30.9107	14.394	3.52564	30.453	1.0703	41.3581	177.659	777.315	184.717	488.768	114.576	1.36231	1.82804	23.4144	0.797183	0.137126	46.0433
Med109	2	1	70	27.2785	2	10.1414	15.019	9.22844	4.52207	19.7089	1.80846	71.812	65.612	233.114	294.636	471.281	113.408	1.54987	1.19036	26.4205	2.09751	0.225396	53.1964
Med109	2	1	70	27.1477	3	7.23064	36.3388	15.7012	3.38947	22.6466	1.52397	45.445	76.0097	304.443	171.954	519.252	137.652	1.29176	1.3789	136.785	1.1893	0.13463	49.7246
Med110	1	1	66	28.5052	1	10.4686	27.6936	8.04104	3.66075	6.79245	0.935511	48.1112	102.001	186.845	340.707	376.071	99.9985	1.58825	1.1286	21.7718	0.875584	0.147507	43.0548
Med110	1	1	67	27.3174	2	7.88646	11.0883	10.9297	4.46039	12.6246	1.86598	62.2081	122.487	663.643	256.712	459.161	110.47	1.76476	1.23327	98.3725	1.33424	0.135905	57.0637
Med110	1	1	67	27.0621	3	8.77546	26.8811	11.4711	4.11819	31.6396	2.34278	57.8144	147.511	806.275	137.412	524.464	114.28	1.42943	1.12705	23.9468	1.32989	0.14587	48.5182
Med112	2	2	68	25.0329	1	10.5674	28.5387	14.3989	2.52103	19.1959	1.93206	60.8602	62.6665	169.968	206.677	377.729	129.296	1.09703	1.06896	159.072	1.53486	0.197185	43.7244
Med112	2	2	69	25.4362	2	11.2284	41.3195	9.87703	2.21427	17.7033	0.870166	57.8115	79.4572	129.275	264.319	305.822	141.666	1.2012	1.98312	130.929	0.843458	0.200825	34.3225
Med112	2	2	69	24.6154	3
Med113	2	1	69	26.6141	1	8.67958	31.8406	12.2474	2.71868	22.2928	0.888111	52.2462	125.723	391.305	494.196	487.332	217.645	1.59355	1.64041	56.1394	1.24873	0.190555	57.0227
Med113	2	1	69	26.8697	2	7.12835	59.924	12.4136	3.34144	28.4633	2.18118	52.2347	146.193	609.366	257.957	470.863	133.642	1.53645	1.34962	67.3774	1.61082	0.162323	52.1312
Med113	2	1	69	27.2825	3	9.77945	14.3335	9.73496	6.65672	24.5497	2.88668	54.2239	128.227	718.765	139.788	559.507	94.864	1.87211	1.23112	16.1775	1.51019	0.154076	68.8254
Med115	2	1	73	21.9992	1	6.00333	22.6772	16.5131	5.02515	42.0472	1.65121	65.0037	224.012	1262.13	174.669	600.482	108.935	1.43102	1.26519	60.226	1.71389	0.186161	57.5528
Med115	2	1	73	21.2637	2	7.9258	21.0661	12.6997	5.43859	30.7185	2.03507	86.6585	162.529	895.443	211.322	497.285	99.4343	1.6914	1.28232	105.902	1.54919	0.124936	58.4861
Med115	2	1	74	20.619	3	8.88781	22.5621	10.9881	4.69686	49.821	2.99434	66.2621	232.261	1311.01	119.084	561.106	105.227	1.4583	1.19119	75.1159	1.83847	0.158889	48.9731
Med116	1	2	68	25.2795	1	8.42419	25.9935	11.4686	2.49188	33.713	0.783095	34.6142	78.9075	150.725	563.722	332.097	103.525	0.922309	1.32235	7.76771	0.742295	0.107877	35.4904
Med116	1	2	68	25.3177	2	11.7689	14.4844	7.05153	2.86594	27.1661	1.29362	35.4001	75.6991	335.814	241.93	309.543	51.3131	1.05029	0.758016	42.6952	1.71928	0.129646	37.9717
Med116	1	2	74	24.7093	3	10.367	19.2704	10.726	2.84478	36.7582	0.982005	34.1477	43.1142	94.1664	275.091	362.993	108.478	2.03775	2.13954	80.748	1.32825	0.113025	54.336
Med117	1	1	65	27.2034	1	14.3641	16.9458	16.0304	2.73762	16.6261	1.80254	60.6075	60.16	290.576	136.311	419.812	71.1312	1.08408	0.997705	28.8	2.19505	0.159319	43.3757
Med117	1	1	65	26.9976	2	11.0957	23.2134	16.5481	4.99809	39.3069	1.67234	60.237	122.286	732.044	155.135	566.669	73.3213	1.34929	1.04831	46.317	1.44386	0.0952572	48.2006
Med117	1	1	65	27.1739	3	13.1744	14.9694	15.5952	7.06855	19.2908	1.73611	61.6129	187.651	1027.02	294.905	598.931	102.383	1.93157	1.70651	39.8738	0.935536	0.126512	53.7999
Med118	2	2	75	19.9929	1	10.6852	30.7326	16.3484	3.72439	9.28864	0.944687	31.1124	159.773	654.294	274.902	334.238	120.789	1.06876	0.959922	6.7743	1.20484	0.358415	32.4682
Med118	2	2	75	19.9522	2	11.1914	55.1104	14.0281	3.14961	23.2865	0.883072	42.0361	142.514	292.185	260.437	350.016	136.417	1.03094	1.15586	19.9922	1.22713	0.260415	35.4736
Med118	2	2	76	20.3849	3	10.5683	53.8591	14.9087	3.21992	22.4668	0.830002	45.2734	186.085	668.318	248.317	316.178	158.514	1.04506	1.15027	14.5262	0.85948	0.145901	34.8356
Med119	1	2	73	28.0836	1	7.46854	36.7155	14.4266	4.16599	30.2139	1.29282	65.5347	188.732	861.821	170.428	479.744	185.344	1.47951	1.42653	10.1625	1.51851	0.0937626	52.7493
Med119	1	2	73	28.7504	2	5.93644	44.0077	16.0382	4.03009	12.0791	1.40724	39.8465	163.163	809.144	266.478	430.245	125.511	1.64567	1.94317	17.6288	1.37518	0.115367	55.1864
Med119	1	2	73	28.0634	3	5.03898	59.8426	11.2108	4.14345	8.58855	1.71462	46.8289	172.457	718.364	203.505	401.464	97.5267	1.87045	1.54864	15.8857	1.39175	0.0907175	53.5833
Med120	2	2	69	24.3062	1	6.84659	30.2666	18.3816	3.92981	31.6222	1.28338	41.3501	113.979	497.061	195.986	520.904	160.702	1.62186	1.34758	6.46161	1.70255	0.261519	61.3739
Med120	2	2	69	24.6285	2	6.66414	35.7246	14.853	3.68715	10.597	1.23922	31.7348	133.891	645.1	271.093	442.75	147.198	1.59173	1.54988	12.708	1.44741	0.141387	53.191
Med120	2	2	69	24.7831	3	5.29444	40.6494	15.0032	3.99226	8.62393	1.50313	50.7927	151.526	730.539	194.422	395.049	87.5182	1.46464	1.30179	10.7522	1.17064	0.112	47.7295
Med121	2	1	67	25.734	1	8.00111	32.1716	16.6342	3.51909	24.6103	0.812922	40.2008	144.804	658.221	307.06	489.612	81.4495	1.8516	1.55014	75.1972	0.572031	0.133857	43.4673
Med121	2	1	67	25.6143	2	9.25662	16.7813	8.79119	5.49364	24.1082	2.36105	54.2839	138.797	759.58	323.524	405.927	99.5141	1.66569	1.06669	78.1122	1.78868	0.158886	52.7595
Med121	2	1	67	25.299	3	9.32071	21.4107	10.4683	3.74795	18.3238	2.30895	58.4761	84.5494	404.784	225.256	451.004	117.532	1.2776	1.11483	210.356	2.05551	0.14699	50.3431
Med122	2	2	72	26.1466	1	6.30341	28.4825	5.63033	3.01415	15.3107	1.07701	43.4743	236.087	284.794	437.164	486.043	73.2974	1.86091	1.57845	16.993	1.42971	0.101435	50.0815
Med122	2	2	72	26.3531	2	8.02914	40.4366	6.04378	3.55329	10.6542	2.18978	51.3732	72.2485	368.908	202.548	442.903	68.4742	1.74911	1.83774	14.044	2.62161	0.102869	60.242
Med122	2	2	72	26.5539	3	4.33713	25.7512	7.87955	4.56105	25.1019	2.41237	70.6275	218.418	1345.01	467.395	523.469	75.1469	1.93164	1.37717	4.48045	2.37128	0.190132	62.7117
Med123	1	1	72	24.1746	1	11.4955	36.9178	7.9728	3.10468	5.42801	0.803718	46.9007	110.722	385.716	290.36	337.662	84.3193	1.41427	1.17888	7.42242	1.13404	0.222133	47.0525
Med123	1	1	72	24.4926	2	11.8359	24.2427	10.4124	3.58677	11.2177	1.81	49.0299	103.509	448.456	190.748	316.939	78.9484	1.41305	0.934964	100.393	1.71165	0.186886	47.5591
Med123	1	1	73	23.9591	3	10.0079	31.3947	11.4244	4.39116	19.3868	2.01499	58.5591	276.925	1572.74	213.999	432.862	129.733	1.73382	1.20382	154.689	2.09009	0.276572	50.018
Med124	2	1	74	27.3312	1	7.67377	36.2033	9.55382	3.55883	8.17964	0.884727	41.2029	137.481	582.868	206.467	355.601	93.0668	1.55754	1.20829	7.11383	1.1325	0.225555	45.7571
Med124	2	1	75	28.5934	2	10.8646	24.5612	9.56562	3.51386	8.74424	2.07987	32.2642	108.253	484.633	182.856	314.941	78.8177	1.29655	0.86589	108.607	2.13364	0.242091	44.6752
Med124	2	1	75	28.0515	3	7.31185	41.794	11.6748	3.99117	17.9042	2.06337	53.4717	294.811	1666.9	199.887	425.254	112.018	1.6941	1.09402	211.454	2.0721	0.287683	44.9895
Med125	1	2	69	23.9689	1	10.8979	37.4469	10.4643	3.72873	19.8607	1.50212	58.7072	127.362	632.282	259.324	538.07	139.616	1.66852	1.81884	175.829	1.81577	0.231019	60.6158
Med125	1	2	69	23.27	2	10.5288	41.4994	11.6995	4.0875	20.3236	1.8339	58.272	82.4855	289.391	291.387	551.17	138.281	1.80792	1.68103	166.238	1.25067	0.1609	63.3031
Med125	1	2	69	23.1764	3	13.2369	18.9459	9.5401	3.69296	14.6773	1.69167	41.2928	86.698	352.753	236.587	384.099	106.777	2.71524	1.23411	0	1.24603	0.138672	53.2616
Med126	1	2	66	26.0125	1	9.75589	33.3455	13.819	4.55661	13.0888	1.5013	43.2934	97.5432	380.948	366.564	408.802	108.342	1.81849	1.67602	16.6661	1.14534	0.141171	47.9269
Med126	1	2	66	26.4654	2	11.7655	22.0275	8.54486	3.01216	3.95591	1.47612	38.785	33.54	75.7473	262.359	288.09	81.2543	1.4077	1.48044	22.4236	1.85285	0.103255	44.5919
Med126	1	2	66	25.7306	3	12.1013	30.5985	10.8521	2.47611	8.56261	1.08318	21.8033	88.3247	246.007	239.013	273.524	85.1234	1.12831	1.23535	14.5505	0.935275	0.118848	31.6324
Med127	1	2	68	24.5514	1	9.97606	25.0477	18.6058	2.40734	26.8958	0.62451	47.2667	60.7317	186.495	207.47	429.264	99.9516	1.55441	1.55947	25.4723	0.835547	0.100208	41.8037
Med127	1	2	68	23.9817	2	8.34095	45.9693	13.1224	2.31772	7.0418	0.541048	44.452	79.9518	128.833	253.584	309.234	118.103	1.61822	1.59573	18.6328	0.833343	0.141081	34.7999
Med127	1	2	68	24.0196	3	11.1927	19.5244	17.1656	2.71534	8.23897	1.26125	44.6748	52.6912	70.8392	258.683	315.984	112.904	1.23372	1.1218	7.28288	0.892131	0.0913361	33.4981
Med129	2	1	65	28.7184	1	9.16844	36.1066	8.21727	2.67349	9.70161	0.962132	37.7003	94.6056	379.806	303.864	383.428	88.0663	1.90517	1.44594	123.876	2.18069	0.105921	63.1395
Med129	2	1	66	27.3069	2
Med129	2	1	66		3
Med130	2	1	70	27.2903	1	7.78147	54.7927	19.8375	3.01989	14.0906	0.572504	89.9592	0	162.953	309.692	491.967	171.741	1.58288	1.59287	42.7059	0.667798	0.169748	47.3639
Med130	2	1	70	27.7746	2	9.26991	36.1354	12.4814	3.20807	18.949	2.05036	40.7581	210.621	1173.79	197.455	395.441	111.379	1.08387	1.07463	118.944	1.38253	0.103325	43.1291
Med130	2	1	71	28.7576	3	9.09221	41.7579	16.0534	3.57286	24.9862	1.3232	40.6359	410.271	2258.07	179.066	450.952	151.168	1.16794	1.15286	176.968	1.32186	0.190552	47.4942
Med131	1	2	76	26.746	1	10.5061	35.686	9.27746	4.39517	17.0804	1.10985	69.1754	60.538	217.34	266.286	371.055	53.528	2.09427	1.19131	8.7184	1.24609	0.182078	44.1474
Med131	1	2	76	25.4462	2	10.0255	9.30281	8.91825	5.31874	26.2676	1.43928	80.3707	46.8598	213.913	296.313	420.114	79.5196	2.1078	1.38514	1.07925	1.7687	0.202245	52.9598
Med131	1	2	76	27.2285	3	12.2598	36.7272	9.54087	2.58886	7.62199	0.657005	44.4887	37.2249	34.2007	273.595	274.462	66.8126	1.64059	1.88655	36.5603	1.01422	0.157659	32.7954
Med132	1	2	79	23.953	1	9.47654	30.5536	16.0909	2.89979	8.90901	2.11661	37.8408	86.3982	247.522	207.354	252.121	99.4988	1.33263	0.912654	28.5021	2.25012	0.142143	35.1939
Med132	1	2	79	23.9951	2	11.8143	21.3379	10.2436	1.98928	3.51869	1.32995	31.3606	37.4478	69.7209	249.197	212.478	72.3644	1.29606	0.942367	9.43225	1.16184	0.121617	25.1498
Med132	1	2	80	24.1702	3	11.3912	25.5194	14.9005	1.94208	13.5261	1.12826	62.6812	65.9424	240.386	269.404	259.375	81.5287	1.35362	0.835104	5.30714	1.08711	0.137607	25.3882
Med134	2	2	65	29.4221	1	9.98912	25.1736	9.86201	2.52101	23.9659	1.23012	34.8952	79.2951	200.477	324.168	354.335	110.5	1.142	1.14372	122.944	1.02111	0.236863	35.5888
Med134	2	2	65	29.4221	2	9.22169	50.1509	8.48631	2.22424	15.0238	1.41426	33.3633	117.085	537.465	221.102	351.595	85.1977	0.998399	1.24317	20.5094	1.25054	0.105564	37.6464
Med134	2	2	65	29.9638	3	9.72873	35.1276	13.3073	2.45032	15.1952	1.02213	45.1795	111.983	465.722	302.997	367.283	89.9694	1.2545	1.29106	11.5492	1.1665	0.126995	46.2465
Med135	2	2	76	27.9792	1	13.8272	52.3055	12.2128	2.99819	14.4265	1.01227	59.9988	149.526	630.954	296.799	383.878	92.949	1.23109	1.01636	12.0072	0.959981	0.201553	35.9695
Med135	2	2	76	28.3828	2	11.1838	40.7775	13.7959	3.99007	17.7234	1.33651	51.3	100.198	381.808	219.97	422.703	99.3515	1.2632	1.09286	6.3833	1.05405	0.166163	48.7978
Med135	2	2	76	27.2955	3	11.7531	41.4973	11.5641	3.21832	19.2471	2.22004	52.6842	147.94	711.25	262.62	444.516	93.5807	1.32185	1.34048	10.999	1.57517	0.128437	41.2565
Med136	1	1	79	28.37	1	8.38522	30.7627	12.1285	2.51828	10.3906	0.865761	30.5743	96.9236	270.204	176.103	319.648	58.2061	1.50933	1.33699	126.014	0.619448	0.130627	33.324
Med136	1	1	80	28.2504	2	7.20554	17.703	9.0065	3.5203	18.0568	2.05761	47.9453	59.4046	289.298	192.566	375.209	77.7333	1.38542	1.1518	161.894	1.75063	0.146832	44.2101
Med136	1	1	80	27.784	3	7.73686	30.4657	7.73459	3.1117	11.3675	2.06486	52.2907	61.9716	246.137	267.28	404.907	110.337	1.52784	1.18622	234.8	1.34349	0.152099	46.7953
Med137	2	2	70	26.7214	1	7.76718	36.5566	11.3785	2.90964	12.105	0.943148	31.0103	89.9597	120.404	331.888	352.826	110.79	1.16739	0.947438	27.7076	1.16333	0.159343	42.9407
Med137	2	2	70	27.0974	2	7.43668	20.9052	7.5772	4.25539	23.2545	1.61692	39.4443	125.05	772.05	171.475	459.668	44.0952	1.785	1.72324	46.4519	1.6347	0.105717	53.5774
Med137	2	2	70	25.6985	3	5.76323	33.6826	11.2094	2.9398	12.6377	1.124	57.4366	104.617	329.48	271.088	445.611	104.014	1.39601	1.34362	10.058	1.08818	0.097079	46.4748
Med138	1	2	67	29.019	1	9.47244	52.8164	5.13561	2.02387	10.2108	1.29756	47.6949	51.5299	64.2511	224.988	384.323	77.1176	1.22644	1.63509	49.5939	1.53127	0.177932	50.1994
Med138	1	2	67	28.4945	2	9.31693	41.173	6.23921	1.93725	13.2894	0.776392	44.0293	115.269	404.97	355.013	317.089	100.936	1.00036	1.21046	135.293	1.03401	0.107461	38.3314
Med138	1	2	67	28.3474	3	8.60271	52.1792	4.10798	1.75136	7.04887	1.00164	42.9723	49.0028	103.036	294.687	353.014	80.6403	1.13633	1.33269	153.688	1.53496	0.189763	37.8552
Med139	2	2	65	27.8054	1	6.58442	56.5348	8.47384	2.36602	15.2947	1.46101	44.0794	248.694	1248.46	210.962	431.201	77.662	1.39075	1.73273	62.866	1.18771	0.164265	52.9158
Med139	2	2	65	27.9457	2	8.12638	53.8485	9.07697	2.11307	16.9327	0.600336	47.8866	151.306	614.245	395.362	405.064	100.518	1.15168	1.29945	155.816	0.580017	0.116214	36.3925
Med139	2	2	65	27.8105	3	6.74281	57.4155	7.40243	2.56383	11.7115	1.17219	47.3333	56.0561	150.473	255.116	417.479	93.2829	1.34135	1.38358	52.2384	1.87456	0.226397	40.2585
Med140	2	2	75	28.9127	1	8.08562	43.8061	12.8991	2.85313	6.44722	1.00956	41.8591	105.709	462.447	150.304	437.463	106.077	1.55359	1.32817	161.613	0.649562	0.107928	41.8857
Med140	2	2	75	28.8072	2	6.27128	31.687	16.8085	3.92072	15.7353	0.933648	37.7593	144.324	880.775	182.631	535.594	107.477	1.49896	1.4238	193.774	0.912343	0.0787873	44.3191
Med140	2	2	75		3
Med141	1	1	74	28.0993	1	8.99592	33.9403	12.5932	3.14446	33.85	1.4086	39.6968	123.471	577.658	157.504	554.723	72.146	1.65243	1.38701	13.8358	0.936049	0.170573	51.7329
Med141	1	1	75	28.0644	2	8.64167	15.2606	9.85757	4.69037	28.9105	1.84492	56.5916	130.688	759.329	179.268	520.716	98.6246	1.79999	1.24888	203.532	1.12509	0.061226	55.7804
Med141	1	1	75	27.7429	3	7.39829	14.7282	11.4012	5.00237	41.5132	1.55014	84.0933	148.801	918.259	176.569	664.177	113.551	2.04616	1.38428	154.027	0.78675	0.0735642	57.5412
Med142	2	1	69	23.0118	1	7.76604	30.5614	11.4652	3.75648	40.155	2.08668	45.7896	175.446	914.499	124.001	585.742	76.3989	1.7354	1.60484	31.9255	1.31672	0.169447	61.5753
Med142	2	1	69	23.1445	2	7.51531	19.8158	12.6483	4.0886	35.4794	1.83863	62.8628	153.658	855.617	184.346	534.986	94.2147	1.41037	1.02766	236.226	0.801993	0.0764857	55.0463
Med142	2	1	70	23.0767	3	6.46364	17.74	11.7424	4.7504	47.3047	1.6316	91.6397	155.958	960.945	166.39	658.573	83.2844	1.61337	1.16658	199.444	0.755794	0.0705937	55.0705
Med143	2	2	79	20.7899	1	8.10675	47.8629	11.3085	3.01538	14.9805	0.75509	36.7342	120.96	443.533	338.942	366.212	60.0012	1.24824	1.18371	37.3648	0.808772	0.207592	34.6086
Med143	2	2	79	20.99	2	8.68592	40.5357	11.4146	3.18714	12.3047	1.21639	50.1828	132.782	394.68	353.185	327.508	61.9219	1.43119	1.24416	107.706	0.900212	0.257633	35.586
Med143	2	2	79	20.9637	3	6.13984	55.4626	9.70581	4.05507	11.2885	0.914004	49.2816	82.4386	244.836	366.227	511.704	63.8192	1.44198	1.21918	40.2544	0.891398	0.23561	44.2923
Med145	2	2	71	27.3633	1	16.4158	36.9571	18.6644	2.43964	7.64651	1.08663	21.0305	131.183	680.274	298.345	318.267	83.7099	1.07915	1.17206	22.6219	1.7679	0.253014	34.5945
Med145	2	2	71	27.4286	2	11.2552	22.5054	15.1061	3.24513	16.1433	1.04868	32.5652	126.76	579.965	322.614	404.457	136.137	1.3667	1.59845	23.5739	0.674959	0.0948408	43.6518
Med145	2	2	71	26.5044	3	8.98623	26.4178	17.873	3.12363	9.91197	1.32601	25.1927	104.006	452.278	250.193	439.846	126.269	1.21975	0.99008	7.5259	0.951427	0.121002	42.9021
Med146	1	1	81	25.2635	1	8.54575	28.2527	11.1699	3.43157	27.6014	0.973747	62.7589	128.246	672.214	212.842	378.479	61.8672	1.36692	1.33717	22.5974	0.988533	0.116803	39.8101
Med146	1	1	81	25.6016	2	9.79633	28.1227	10.6346	2.60769	19.9305	1.36372	51.0508	70.5212	220.743	236.048	337.71	120.256	1.22263	1.36486	25.429	1.34044	0.131023	46.0887
Med146	1	1	81	25.5021	3	9.07213	20.8969	11.5981	4.55552	14.4825	1.40025	65.4899	99.2864	535.109	192.068	432.942	67.1987	1.47729	1.25632	33.3497	1.47397	0.125882	55.621
Med147	1	2	74	27.5134	1	12.9438	29.5381	11.4046	2.07124	12.7428	0.972658	28.5025	109.434	305.765	238.604	366.09	70.7312	1.65423	1.18147	21.5236	1.18098	0.164416	36.5644
Med147	1	2	74	27.4124	2	9.2221	33.6974	12.6496	2.95964	13.288	0.757653	36.4239	82.8803	254.355	339.941	380.505	76.6028	1.5337	1.55947	25.0788	1.02838	0.119785	51.1128
Med147	1	2	74	27.1369	3	7.69773	46.9045	13.9512	1.78592	15.4026	0.759701	70.1412	83.1733	125.835	332.295	389.24	104.556	1.95383	1.3315	12.5628	0.96479	0.098625	47.0546
Med148	2	1	67	25.5751	1	9.05798	16.4523	10.0404	3.838	19.2867	2.16994	46.5841	279.874	1596.82	173.558	487.922	124.893	1.74973	1.75932	126.921	2.1654	0.300462	66.815
Med148	2	1	67	24.8255	2	9.0601	20.3242	9.16548	4.1477	17.8771	2.83242	62.1326	360.469	2149.7	154.298	523.709	91.8862	1.65676	1.36985	146.442	2.50439	0.154411	58.6771
Med148	2	1	67	24.8886	3	8.83143	15.0794	8.19563	3.48742	16.4973	3.03158	48.0834	289.163	1735.32	218.449	425.922	83.6774	1.73713	1.33108	190.507	2.58959	0.16511	57.9705
Med149	1	1	75	27.0776	1	8.32946	18.8261	11.2627	3.03231	16.3665	1.02169	35.2512	90.4841	398.141	193.662	390.339	86.1261	1.49164	1.32525	6.69012	1.03125	0.0904094	48.6396
Med149	1	1	75	26.3875	2	12.3409	22.206	10.8185	3.042	9.47851	1.69285	34.4299	128.872	735.485	126.854	357.137	73.5051	1.37271	1.13805	155.894	1.91085	0.166158	49.6671
Med149	1	1	75	26.6444	3	7.40973	28.0989	7.39296	3.70491	16.3163	1.63945	42.3379	55.4365	265.37	232.328	508.83	74.9355	1.6484	1.8711	30.7325	1.65551	0.18079	57.2887
Med150	2	1	71	29.993	1	6.68334	31.396	12.6361	3.43317	10.8824	0.968195	33.8725	83.0899	396.693	213.76	439.585	128.804	1.68084	1.81787	13.1372	1.36527	0.0984058	53.6092
Med150	2	1	71	28.434	2	8.66972	17.7165	12.2006	3.68533	10.4132	1.64321	49.9291	77.1462	308.808	286.256	388.897	119.067	1.48997	1.13577	211.701	1.55935	0.117572	49.324
Med150	2	1	71	27.8675	3	7.02852	19.2601	13.2031	3.28653	10.6809	1.90114	62.179	105.498	483.326	195.833	468.494	148.319	1.41113	1.52288	33.9872	2.03213	0.189937	56.288
Med152	2	1	72	35.974	1	7.31418	32.4397	13.9142	3.25558	9.77499	1.38204	56.8224	45.8129	62.2203	222.336	352.6	134.705	1.60177	1.20683	7.80174	1.79916	0.18624	51.5583
Med152	2	1	72		2
Med152	2	1	72		3
Med154	1	2	69		1	12.8289	40.4106	12.1166	3.64056	9.65394	1.25831	58.6287	94.4555	218.343	249.295	413.051	79.6303	1.64741	1.1925	68.7899	1.58879	0.18054	46.0347
Med154	1	2	69	32.0959	2	10.1225	18.7189	14.2123	4.90516	15.9838	0.907302	33.4428	102.925	499.733	206.941	498.786	72.8704	2.69592	2.16737	88.1847	1.11412	0.123714	55.9321
Med154	1	2	70	32.1004	3	7.35957	22.5781	14.5883	3.383	29.403	1.21615	37.3639	126.539	576.955	217.521	500.004	82.8827	2.47029	1.68772	80.2105	0.613508	0.106564	45.1592
Med155	2	1	77	26.3277	1	7.71897	24.8697	8.32762	3.40848	8.93365	1.10569	51.1441	157.876	397.106	327.192	373.496	117.033	1.22647	1.00815	29.383	1.87219	0.264092	46.8912
Med155	2	1	77	26.6373	2	7.76357	17.2699	14.1691	4.02101	15.7597	2.215	50.8096	168.988	867.043	230.78	403.88	106.032	1.40012	1.03919	36.4531	1.35455	0.142109	39.097
Med155	2	1	78	26.282	3	5.3646	11.2792	14.5473	4.29262	20.2585	1.74361	59.8678	129.025	683.21	382.015	546.426	154.189	1.70074	1.25756	28.8417	1.42196	0.148038	56.9717
Med156	2	2	67	25.9676	1	8.97895	38.5005	12.5482	2.69452	10.3217	1.26315	52.4766	201.274	1011.72	297.775	427.305	122.58	1.38186	1.31322	60.4845	0.735122	0.196509	43.9149
Med156	2	2	67	25.3316	2	8.15745	41.8873	11.2909	2.63419	16.3092	1.44088	31.2259	189.295	1012.74	259.666	360.962	92.3625	1.07468	1.13356	37.0473	1.31864	0.135094	42.4043
Med156	2	2	67	23.96	3	6.08615	48.1979	16.2656	2.09694	14.5091	1.58692	30.7789	69.4246	224.896	201.243	434.593	121.693	0.909431	1.14325	20.2193	1.43064	0.232418	54.4526
Med157	1	1	66	24.6103	1	10.0051	26.1019	13.0166	2.63779	9.60553	0.973067	36.9901	118.374	440.033	332.277	346.348	106.905	1.49665	1.49016	8.53845	1.02505	0.216662	36.9181
Med157	1	1	66	23.8548	2	9.30336	34.2494	13.625	3.12495	16.7701	1.54091	72.1019	135.9	582.155	265.831	409.027	122.97	1.67441	1.48099	50.8841	1.5797	0.192278	40.2467
Med157	1	1	66	23.4201	3	9.0897	19.6934	9.12636	3.04808	11.4938	1.77789	56.3425	100.992	441.351	226.534	344.187	80.5782	1.50799	1.18983	33.7882	1.58674	0.131206	39.917
Med159	1	2	67	23.1216	1	10.2817	18.9674	12.0692	3.88646	21.7461	0.727866	72.2724	266.935	1344.07	345.624	512.983	183.648	1.8788	1.63485	5.42303	0.831135	0.146085	53.7461
Med159	1	2	67	23.0796	2	8.3416	20.7919	13.5728	3.08324	13.7802	1.09367	70.0583	72.9302	226.028	262.579	442.036	201.259	1.90814	2.02102	31.3336	1.12135	0.141341	55.5262
Med159	1	2	67	23.2107	3	9.92998	41.9705	15.4536	3.58119	30.2838	1.24777	63.2351	121.887	430.167	235.887	457.699	202.256	1.43074	1.73653	16.9078	0.817514	0.130978	47.028
Med160	2	2	65	34.9268	1	7.39902	40.5889	11.3856	3.33135	9.60779	1.42775	49.1972	113.874	507.606	238.495	434.751	134.487	1.42978	1.42411	189.32	1.18017	0.149771	45.345
Med160	2	2	65	35.0552	2	6.45179	25.0767	12.8935	4.13738	17.3966	1.28771	93.8159	134.893	643.788	277.083	522	124.215	1.98532	1.6569	197.542	1.02886	0.135004	59.0523
Med160	2	2	65	35.4418	3	9.38826	27.5987	14.5494	2.61654	6.16888	1.01386	37.5661	74.5019	215.286	188.923	341.092	107.053	1.57772	1.51338	94.5021	1.03841	0.102467	43.9742
Med162	1	2	65	27.125	1	9.61679	21.4657	13.3279	2.75671	3.98084	1.1111	33.1455	112.824	519.458	176.922	339.762	79.2983	1.10127	1.13021	26.8405	1.40077	0.126373	38.3678
Med162	1	2	65	28.2256	2	10.5284	29.8806	13.1687	3.16103	8.35877	0.983543	36.2277	48.0191	124.046	191.792	330.859	79.7322	1.55012	1.64953	15.6228	1.10053	0.0935297	41.3711
Med162	1	2	65	28.2117	3	8.17043	24.9481	7.58156	2.81295	5.54373	1.23778	36.6287	123.67	610.273	212.197	256.275	100.369	1.05396	1.17735	11.7448	1.7819	0.124759	36.3062
Med163	1	2	70		1
Med163	1	2	71		2
Med163	1	2	71		3
Med164	2	2	69		1
Med164	2	2	70		2
Med164	2	2	70		3
Med166	1	2	66	33.0889	1	8.89024	39.1107	10.0516	4.20743	13.7596	1.63046	65.0121	117.885	469.898	260.359	424.367	134.282	1.44822	1.28478	143.713	1.09174	0.0852313	58.5464
Med166	1	2	66	32.8956	2	12.038	42.0921	11.3265	3.17644	13.0815	0.987885	51.4223	92.9447	256.612	220.252	285.414	90.1006	1.36262	1.51893	15.2361	0.828398	0.13314	42.0003
Med166	1	2	66	32.7873	3	9.43946	39.1001	12.4128	2.46814	10.887	0.975511	35.0938	140.214	512.448	296.203	403.049	128.618	1.12182	1.31832	32.6674	1.17272	0.130845	56.3248
Med167	2	2	74	24.2916	1	7.0147	63.9771	12.1606	2.8989	25.694	1.3726	48.9584	112.023	331.948	334.653	505.583	109.416	1.30506	1.55255	26.4357	2.31895	0.330963	49.087
Med167	2	2	74	24.9733	2	5.06929	82.5871	10.6569	2.44494	26.8813	2.35951	97.598	97.9356	272.339	231.718	494.653	133.528	1.55628	1.88392	29.4701	1.08086	0.119163	54.8862
Med167	2	2	74	24.2916	3	9.84227	51.4946	5.2689	2.24233	7.20689	1.63227	40.7427	66.973	176.608	375.417	362.382	95.7023	1.17716	1.72839	22.9067	2.28929	0.162849	45.4606
Med168	1	1	72	27.2311	1	11.2947	43.1249	12.061	1.97675	10.2866	1.02948	36.47	80.1037	220.585	289.786	444.761	105.249	1.75601	1.31386	62.6124	1.0588	0.177103	47.1626
Med168	1	1	73	26.9508	2	7.73028	18.7613	7.32046	4.24645	15.0785	1.55187	33.4325	117.536	665.037	398.682	563.187	134.94	2.29145	1.18068	131.539	1.03413	0.065471	56.3325
Med168	1	1	73	27.1262	3	9.03992	22.6509	9.40116	3.00669	21.0259	1.95636	60.2895	660.523	0	335.186	588.422	144.421	2.31376	1.37934	264.065	1.22696	0.179838	54.9805
Med169	2	1	70	27.0337	1	8.90813	46.7724	11.2612	2.99295	15.7951	1.24634	57.078	93.5839	283.261	335.615	382.843	127.207	1.54856	1.84081	19.7332	1.48997	0.201515	49.617
Med169	2	1	71	26.7022	2	9.94227	24.6206	12.1742	4.05863	21.0063	1.88343	63.5245	132.281	691.87	156.034	436.295	93.9573	1.414	1.33179	34.3011	1.56983	0.0973813	48.5441
Med169	2	1	71	26.835	3	11.1287	24.6359	14.6707	5.38424	15.843	2.12321	68.7541	189.604	1017.45	176.787	448.194	91.9273	1.75829	1.21057	131.395	1.54047	0.172496	48.5139
Med170	2	2	72	28.439	1	10.1376	28.5431	11.2611	3.07072	17.3027	1.0485	43.7928	131.642	498.739	247.851	404.051	143.134	1.40846	1.24475	22.4318	1.25973	0.194579	46.5892
Med170	2	2	72	29.0619	2	11.5324	31.6253	11.0747	3.01175	10.8888	0.825138	43.2968	181.056	937.688	241.613	484.901	110.694	1.42084	1.74799	28.3486	0.664243	0.184556	41.5917
Med170	2	2	72	29.3888	3	12.9344	40.6738	10.4841	2.73461	7.51415	1.03712	47.1144	149.39	596.615	223.201	397.766	122.452	1.20775	1.44401	19.2651	0.985221	0.127892	44.3418
Med171	1	2	79	24.4226	1	6.9646	17.3799	18.7243	3.12304	25.085	1.47934	38.1702	102.186	275.923	237.372	389.347	109.5	1.14003	1.29842	49.5889	1.6178	0.180638	37.5941
Med171	1	2	80	24.5943	2	9.12084	21.7667	14.0697	2.10821	21.2742	1.54934	41.3554	60.8171	140.808	225.583	334.365	55.8804	1.21745	0.988049	9.68746	1.75945	0.116769	31.1826
Med171	1	2	80	24.5861	3	10.2914	23.8293	13.9173	2.16936	33.8387	1.49972	41.3015	91.8713	186.493	199.155	363.124	78.8773	1.17218	0.897525	50.4345	1.91932	0.164882	33.2674
Med172	2	1	67	25.2846	1	6.13413	30.8183	10.8326	3.79632	20.1579	1.31703	46.1218	80.4739	211.643	334.604	345.098	106.627	1.4074	1.52051	21.9809	1.16649	0.14607	45.5118
Med172	2	1	67	25.071	2	29.1587	9.05897	3.34588	9.50387	1.5229	40.5337	81.5439	283.383	304.621	367.605	100.394	1.34597	1.28148	29.1307	1.55482	0.148912		47.7472
Med172	2	1	67	25.3323	3	25.4221	10.6783	4.29688	13.0981	2.27726	44.6616	114.311	688.844	162.384	461.059	99.8223	1.60844	1.28353	177.41	2.28027	0.208155		57.7506

## Sheet: 5. Carotenoids + erythrocytes
TABLE S1.5 MEDLEY RAW DATA, CAROTENOIDS AND ERYTHOCYTE FATTY ACIDS
StudyID from master data	Gender 1=Male, 2=Female	Diet allocation 1=Med, 2=Hab	BMI (kg/m2)	Age at visit 1	Visit No.	Total Saturates	Total Trans	Total Monos	Total Omega 9	Total Omega 7	Total Omega 3	18:3n-3	20:5n-3	22:5n-3	22:6n-3	Total Omega 6	20:4n-6	18:2n-6+19:0	Omega 6:omega 3	Omega 3 index	beta-cryptoxanthin(ng/mL)	lycopne(ng/mL)	alpha-carotene(ng/mL)	beta-carotene(ng/mL)	lutein/zeaxanthin
Med001	2	2	23.6055	68	1	43.016	0.508693	18.9954	15.6184	1.457	12.6716	0.128417	3.0317	3.15093	6.36053	24.71	9.81508	11.552	1.95004	9.39223	43.9676	617.662	4.17278	981.434	582.268
Med001	2	2	23.3464	68	2	43.4349	0.476014	18.3792	15.5396	1.3098	12.5369	0.133385	2.439	3.33287	6.63167	25.2376	9.96283	11.8114	2.01306	9.07067	57.2704	402.054	8.29196	1097.2	680.81
Med001	2	2	23.7683	68	3	42.7171	0.511331	18.5058	15.5224	1.45216	12.5744	0.148605	2.6188	3.29279	6.51419	25.6809	10.7857	11.4899	2.04232	9.13298	47.3728	307.666	10.2204	1291.89	465.144
Med002	2	1	21.8688	66	1	43.6011	0.398046	17.4081	14.4208	1.74184	13.752	0.134892	3.29552	3.62053	6.70107	24.9409	11.0663	10.3472	1.81362	9.9966	35.9136	280.292	4.0744	1156.34	192.323
Med002	2	1	21.4341	66	2	43.4914	0.439629	17.4306	14.5392	1.57961	12.4151	0.185783	2.30928	3.37782	6.54219	26.2826	11.7754	10.6413	2.11699	8.85147	77.498	280.918	3.39598	768.674	221.192
Med002	2	1	21.3599	67	3	44.4347	0.392999	17.6518	14.5738	1.64756	10.7485	0.162203	1.88249	2.87745	5.82635	26.8503	11.5607	11.5567	2.49805	7.70884	21.1482	122.509	4.73144	979.88	296.092
Med003	2	2	33.3428	72	1	44.3668	0.377856	18.7083	15.5484	1.57713	13.3846	0.127387	2.78327	3.34557	7.12838	23.2448	10.0822	9.56676	1.73669	9.91165	13.0308	93.0568	8.58064	684.818	309.802
Med003	2	2	33.0344	72	2	44.3347	0.594852	18.2313	15.0456	1.48264	13.2663	0.111371	2.59208	3.29235	7.27053	23.7272	10.3377	9.5557	1.78853	9.86262	22.49	93.5032	6.58592	810.722	428.348
Med003	2	2	33.2353	72	3	44.1388	0.44499	18.472	15.3162	1.6545	13.1755	0.143873	2.60184	3.21797	7.21178	23.7583	10.0081	10.0057	1.80323	9.81362	8.74572	163.523	12.1167	772.426	300.252
Med004	2	1	33.2577	78	1	43.573	0.488079	18.7942	14.6501	2.54212	10.5145	0.133898	1.1963	2.31027	6.87401	26.6003	13.2165	8.14075	2.52987	8.07032	15.4793	107.936	7.32634	223.254	284.478
Med004	2	1	33.1859	78	2	44.6334	0.547284	18.5086	14.5137	2.2502	9.951	0.14089	1.04439	2.15817	6.60755	26.5206	13.0583	8.24757	2.66511	7.65194	5.38102	143.167	4.84314	389.1	162.464
Med004	2	1	33.4657	79	3	44.4693	0.465988	18.4778	14.6699	2.16154	10.252	0.144019	1.17096	2.33099	6.60598	26.4407	12.712	8.45684	2.57909	7.77694	11.7818	100.584	4.78826	280.178	264.272
Med005	1	1	26.5096	80	1	44.1579	0.463408	18.6377	15.6326	1.58862	10.0452	0.189818	1.23867	2.61386	6.00288	26.8591	13.648	9.00797	2.67382	7.24155	38.5976	289.84	8.84116	1414.68	160.211
Med005	1	1	25.6952	80	2	43.0921	0.307485	19.3646	16.171	1.57404	9.8609	0.186923	1.14877	2.59332	5.93189	27.6426	13.0426	10.1802	2.80325	7.08065	9.30826	465.672	6.23712	1296.14	293.752
Med005	1	1	25.7131	81	3	43.0258	0.444099	18.8187	15.7528	1.52391	9.88248	0.196245	1.11396	2.59774	5.97454	27.9923	13.2516	10.4801	2.83252	7.08849	9.30826	465.672	6.23712	1296.14	293.752
Med006	2	1	22.8865	82	1	42.2544	0.543925	18.2678	14.9862	1.46387	7.92508	0.189283	0.948086	2.07326	4.71445	30.9913	14.1918	11.735	3.91053	5.66253	3.53146	280.572	9.23938	843.876	388.182
Med006	2	1	22.895	82	2	41.6491	0.541148	18.2864	15.1472	1.48771	8.64065	0.160633	1.13562	2.04923	5.29517	31.0229	13.615	12.8818	3.59034	6.43078	6.73384	338.53	10.6782	447.218	435.606
Med006	2	1	23.0452	83	3	43.0584	0.641355	18.9268	15.4775	1.47807	8.33617	0.160734	0.946876	1.94535	5.28321	29.2293	13.1613	11.4968	3.50632	6.23009	3.07016	205.26	22.2064	632.756	425.544
Med007	1	2	24.7133	81	1	44.4879	0.469738	17.2094	14.117	1.55677	12.3348	0.087969	1.99736	3.47138	6.77809	25.8178	11.3831	10.117	2.09309	8.77545	16.9502	90.1404	4.4984	1627.9	242.284
Med007	1	2	24.261	81	2	43.8268	0.528763	17.8793	14.7329	1.7311	11.5714	0.146498	1.81472	3.19358	6.41663	26.5309	11.5209	10.5647	2.2928	8.23135	8.91036	112.076	10.4211	1594.03	224.518
Med007	1	2	24.2846	81	3	44.1538	0.399753	17.8466	14.7983	1.65257	11.1254	0.193898	1.65157	3.18944	6.09054	26.5736	11.6195	10.7239	2.38854	7.74211	8.27132	143.331	3.61208	1264.95	155.079
Med008	1	1	25.48	75	1	43.2204	0.484854	17.8037	14.7988	1.45112	13.9363	0.075901	2.94801	3.78516	7.12724	24.8528	10.4155	11.1173	1.78332	10.0752	19.6684	83.4742	6.4672	802	272.32
Med008	1	1	25.2965	75	2	42.6977	0.387734	18.6089	15.3237	1.50716	14.3551	0.071438	3.36535	3.82538	7.09288	23.9833	10.2552	10.4695	1.67073	10.4582	10.6619	113.244	5.10884	635.964	245.396
Med008	1	1	25.163	75	3	42.0257	0.361078	19.2397	15.66	1.52503	12.4955	0.169951	2.1144	3.44546	6.76573	26.1636	11.1006	11.2229	2.09383	8.88012	45.147	92.461	10.6089	1120.51	224.11
Med009	2	1	25.2923	72	1	43.6021	0.533497	18.0368	14.1654	2.27684	13.2174	0.142002	2.97206	3.35576	6.74755	24.6477	11.5278	9.19449	1.86479	9.7196	23.4126	118.977	9.2448	1124.89	541.586
Med009	2	1	24.8877	72	2	43.3443	0.498444	19.7226	15.3952	2.34076	12.073	0.116588	2.5769	3.08351	6.29596	24.5388	11.1652	9.49056	2.03254	8.87286	71.8158	137.95	10.8068	925.916	582.392
Med009	2	1	24.396	73	3	42.2139	0.489062	19.2039	14.9434	2.12676	13.481	0.15364	2.94774	3.34763	7.03195	24.8121	11.1349	9.71091	1.84053	9.97969	68.1116	88.3792	10.7258	1417.86	682.108
Med010	1	2	34.0432	82	1	44.6572	0.438059	20.5573	17.283	1.54009	11.16	0.152268	1.56658	2.37934	7.06181	23.4501	10.186	9.51508	2.10127	8.62838	5.22354	207.522	4.84718	739.22	523.572
Med010	1	2	34.2685	82	2																18.2962	180.022	4.77458	900.886	563.454
Med010	1	2	34.053	83	3	44.0723	0.391048	20.7046	17.0988	1.64128	12.8788	0.106155	2.07221	2.30615	8.39426	22.1368	10.5144	8.26351	1.71886	10.4665	5.19258	133.111	17.3426	1517.26	369.706
Med011	2	2	24.996	76	1	42.7651	0.463705	18.8811	15.384	1.64979	11.9581	0.090235	2.98439	2.65679	6.22666	26.0269	11.7088	10.8552	2.17651	9.21105	28.858	226.21	2.7076	452.15	366.414
Med011	2	2	24.4752	76	2	41.9979	0.521859	19.4947	16.1254	1.55369	12.8028	0.100338	2.69631	3.26075	6.74541	25.3012	10.6725	11.7518	1.97622	9.44172	44.4752	120.599	8.7301	1790.21	444.384
Med011	2	2	24.3304	76	3	42.9142	0.452935	19.0005	15.8498	1.49878	12.4812	0.086477	2.59274	3.22483	6.57715	25.3203	11.3257	10.9383	2.02868	9.16989	30.8744	238.174	10.87	1154.82	373.682
Med012	2	1	25.695	71	1	41.7783	0.543579	20.9174	17.3877	1.87997	8.47572	0.142957	0.894564	1.98242	5.45578	28.455	13.4222	10.4119	3.35724	6.35035	24.4332	479.764	2.87992	482.874	493.356
Med012	2	1	25.7747	71	2	42.5935	0.467628	19.9656	16.6516	1.66101	8.62341	0.187463	0.984289	2.12671	5.32495	28.5991	13.2563	10.38	3.31645	6.30924	24.0016	227.95	5.18634	468.456	501.156
Med012	2	1	25.5732	71	3	42.153	0.512124	20.7127	17.091	1.82035	8.63879	0.115672	0.934808	2.2124	5.37591	28.0726	13.4699	9.7366	3.2496	6.31072	19.0246	424.996	2.6553	604.41	665.414
Med013	2	1	27.8883	68	1															0	32.0554	98.835	8.4562	1543.55	375.41
Med013	2	1	26.7	68	2	43.211	0.509254	19.3004	15.8789	1.63636	14.2256	0.108122	3.28934	3.34439	7.48376	22.9639	10.6488	9.23361	1.61427	10.7731	41.6468	113.133	14.2561	1115.22	544.3
Med013	2	1	26.143	68	3	42.7113	0.460631	19.9203	16.4115	1.74677	12.1678	0.158032	1.89548	2.99596	7.11834	24.9684	11.2641	10.117	2.052	9.01383	28.7634	148.688	34.9146	1512.14	324.706
Med014	1	2	20.4246	76	1	43.0126	0.482488	18.4335	15.0147	1.84596	7.09165	0.170535	0.884524	2.16623	3.87036	31.1626	14.0965	12.3319	4.39427	4.75489	32.9198	92.5978	16.2315	616.214	416.93
Med014	1	2	20.4621	77	2	42.8668	0.604931	17.62	14.3375	1.84929	7.3052	0.173371	0.773803	2.25859	4.09943	31.7888	13.9584	13.1782	4.35154	4.87324	29.3088	77.1056	8.39238	463.91	366.306
Med014	1	2	19.8163	77	3	43.4499	0.505656	17.854	14.6321	1.86662	7.55716	0.148463	0.870727	2.33082	4.20714	30.6889	14.7184	11.174	4.06091	5.07787	14.4155	86.5292	13.6717	366.668	395.386
Med015	2	1	26.6966	68	1	46.9468	0.638577	19.8045	16.532	1.62015	6.56761	0.118017	0.793408	1.98224	3.67394	26.2922	12.778	8.25671	4.00331	4.46735	6.8833	107.282	12.055	698.578	427.792
Med015	2	1	25.91	68	2	45.5024	0	19.6814	16.4336	1.60848	7.48707	0.058032	0.680914	2.15098	4.59715	27.6995	13.9044	8.59685	3.69965	5.27806	4.8554	85.8452	5.04606	516.93	332.698
Med015	2	1	26.1108	68	3	43.0163	0.310285	19.0768	15.8915	1.82001	8.54393	0.149967	1.02234	2.22891	5.14272	29.28	14.4199	9.41228	3.42699	6.16506	9.1161	92.7524	6.1084	536.708	304.982
Med016	1	2	25.1843	74	1	44.7044	0.311036	17.6396	14.8511	1.35032	11.4755	0.071438	1.65583	3.0051	6.74312	26.1515	12.5519	9.7722	2.27891	8.39894	11.928	77.5982	3.0674	625.514	507.006
Med016	1	2	25.0284	75	2	43.8662	0.354728	17.944	15.0718	1.46215	10.5819	0.069951	1.37776	3.04902	6.0852	27.5549	12.3932	11.08	2.60396	7.46296	21.926	112.864	3.11238	507.014	467.39
Med016	1	2	25.2305	75	3	44.2543	0.318233	18.2222	15.3904	1.43164	10.9163	0.070535	1.41259	2.95779	6.47542	26.5859	12.4069	10.2068	2.43542	7.88801	12.2464	106.263	4.2037	769.202	534.116
Med017	1	1	30.033	76	1	44.007	0.363271	18.605	15.414	1.66485	9.8022	0.213074	1.29819	3.15176	5.13918	27.4889	12.4123	10.351	2.80435	6.43737	5.73002	105.974	4.42914	857.784	222.17
Med017	1	1	30.033	76	2	45.318	0.324865	18.8553	15.6596	1.73655	9.22269	0.113074	0.93923	2.95398	5.21641	26.5555	12.0246	10.1835	2.87937	6.15564	4.94586	100.697	34.6706	1647	218.438
Med017	1	1	30.0759	77	3	44.5654	0.319964	19.0147	15.8805	1.68825	9.2715	0.222102	1.01716	2.82228	5.20996	27.0673	12.0229	10.6859	2.91941	6.22712	7.55598	96.7864	10.603	634.598	266.012
Med018	2	2	20.2989	66	1	42.939	0.346896	19.48	16.3298	1.66425	11.3625	0.122102	1.77412	2.77437	6.69188	26.2783	10.7972	11.9415	2.31273	8.466	19.535	144.266	8.5257	798.424	691.956
Med018	2	2	20.0196	66	2	42.8041	0.391896	19.3953	16.2217	1.61776	12.1081	0.144987	1.98657	2.90794	7.06857	25.6712	10.9973	11.4259	2.12018	9.05514	6.81164	100.618	7.69276	587.404	465.958
Med018	2	2	19.4243	67	3	42.7282	0.355186	19.6945	16.3142	1.66535	11.9759	0.056608	1.82999	2.93342	7.15591	25.583	10.9496	11.0832	2.1362	8.9859	126.465	224.266	6.85316	769.842	497.376
Med019	1	1	30.013	74	1	42.6078	0.427271	19.6609	16.8121	1.31488	8.20685	0.202836	0.974553	2.6861	4.34337	29.405	13.0991	10.6466	3.58298	5.31792	39.8042	123.703	2.48064	994.534	228.638
Med019	1	1	30.451	74	2	43.1382	0.406295	19.4674	16.5369	1.30032	8.10356	0.152591	0.919711	2.52696	4.50429	29.4543	12.8943	11.0337	3.63474	5.424	21.3908	85.4288	3.37776	1167.94	243.406
Med019	1	1	31.1609	74	3	44.0347	0.413529	20.5953	17.5452	1.30926	7.88989	0.144987	1.01895	2.40819	4.31776	27.8017	12.0804	10.553	3.52371	5.33672	27.8356	113.538	3.85688	1111.21	279.806
Med020	2	2	28.9673	65	1	44.1098	0.374775	18.8482	15.7308	1.65719	9.2789	0.056608	1.29336	2.94788	4.98105	27.8898	12.2168	10.7022	3.00572	6.27441	4.54638	88.9724	2.32026	414.208	580.394
Med020	2	2	29.1884	65	2	44.6186	0.350375	18.3939	15.3353	1.60786	9.68298	0.180114	1.45495	2.75486	5.29306	27.3655	11.7789	10.7093	2.82615	6.74801	2.85808	83.1508	3.20192	395.782	386.734
Med020	2	2	28.9831	65	3	44.275	0.481566	17.7488	14.8454	1.59804	9.40394	0.056608	1.18283	2.84959	5.31491	28.8786	12.3434	11.1409	3.0709	6.49774	4.1708	122.559	3.44274	296.086	344.248
Med021	1	1	22.051	65	1	42.5235	0.527064	18.7388	16.0224	1.4666	10.9909	0.149216	1.484	2.42556	6.93215	27.8027	11.8328	12.3024	2.5296	8.41615	46.9272	205.22	4.6378	1667.68	501.722
Med021	1	1	22.0763	65	2	43.0086	0.50062	18.7753	16.0326	1.32694	10.8527	0.166404	1.58659	2.33893	6.76078	27.4175	11.8185	11.8328	2.52633	8.34737	46.1078	291.46	4.2575	1376.02	570.788
Med021	1	1	22.2476	65	3	43.285	0.443532	19.4477	16.5939	1.30384	12.5146	0.056608	2.21342	2.62149	7.62304	24.8678	10.7211	10.9768	1.98711	9.83646	27.411	82.0078	2.31592	688.558	201.188
Med022	1	1	28.8683	71	1	43.7465	0.38107	19.319	16.418	1.57676	8.09693	0.144987	0.886756	2.65464	4.41055	28.8956	13.372	10.8264	3.56871	5.2973	30.527	128.048	2.9822	266.632	387.184
Med022	1	1	28.0863	71	2	43.8186	0.400857	19.1541	16.3179	1.35375	9.73288	0.123448	1.53714	2.81197	5.26032	27.3387	12.6456	10.4532	2.80891	6.79746	42.5586	127.024	2.78512	470.764	554.646
Med022	1	1	28.031	71	3	42.9843	0.399237	19.5541	16.6104	1.4602	9.44684	0.199858	1.28998	2.83611	5.12089	28.1153	12.4333	11.4741	2.97616	6.41087	14.0197	119.116	4.14006	555.096	421.198
Med023	1	2	22.2771	69	1	41.7449	0.311417	22.5629	18.2571	3.01072	8.95097	0.204343	1.61763	2.64883	4.48017	26.9691	10.0973	11.9821	3.01298	6.09779	43.609	96.7458	3.16936	645.442	643.234
Med023	1	2	22.348	69	2	43.6408	0.417948	20.9349	16.7658	2.67497	9.25823	0.184811	1.41292	2.78658	4.87392	26.3233	10.507	10.5828	2.84323	6.28683	19.7211	119.731	9.7632	819.05	720.42
Med023	1	2	22.419	69	3	43.4393	0.355615	20.4411	16.4572	2.51215	9.16362	0.155771	1.35084	2.70288	4.95413	27.1343	10.5883	11.3287	2.96109	6.30497	37.1156	103.073	10.3621	725.63	681.852
Med024	2	2	34.9632	76	1	44.0791	0.397327	19.9001	16.7106	1.74255	7.93184	0.261039	1.20066	3.19904	3.27109	27.954	11.4899	11.941	3.52428	4.47176	20.6728	81.8798	3.4077	748.158	336.338
Med024	2	2		76	2
Med024	2	2		76	3
Med025	1	2	34.3212	68	1	43.8732	0.28778	19.7952	16.9216	1.5131	14.4806	0.056608	3.50799	3.87239	7.04362	22.0167	8.54544	10.5926	1.52042	10.5516	90.1864	96.8744	4.0698	412.322	147.709
Med025	1	2	33.8276	68	2	44.585	0.426803	18.6735	15.5461	1.69426	17.007	0.120378	5.08821	4.17067	7.62771	20.0926	7.96659	9.61298	1.18143	12.7159	27.1974	111.316	3.01646	297.626	243.412
Med025	1	2	33.8722	69	3	45.009	0.516352	19.3317	16.0856	1.70194	15.0847	0.149972	3.62224	3.89801	7.41448	20.885	8.21595	9.88619	1.38452	11.0367	18.1351	95.0112	3.09878	195.192	237.272
Med027	1	2	19.3092	67	1	43.4582	0.348774	19.1743	15.8891	1.45172	7.98555	0.252813	1.02108	2.90667	3.80499	29.3311	12.1156	12.3062	3.67302	4.82607	6.94436	680.222	3.07054	497.098	480.906
Med027	1	2	18.5219	67	2	43.7248	0.333997	19.1769	16.0093	1.46604	8.22271	0.146585	0.933722	2.97201	4.17038	28.9689	12.1668	11.8784	3.52303	5.10411	10.4937	409.002	2.66646	611.17	520.688
Med027	1	2	19.1703	67	3	43.488	0.324006	18.954	15.7989	1.52504	7.86887	0.168357	0.827959	2.98158	3.89097	29.6904	12.8239	11.599	3.77314	4.71893	23.0944	508.79	6.30662	850.054	402.72
Med028	1	1	27.2508	71	1	42.3703	0.617931	20.0124	16.2116	2.08771	10.64	0.290406	1.818	3.1916	5.33996	26.3304	11.9241	10.5254	2.47467	7.15796	39.4094	227.954	8.18296	1315.75	347.086
Med028	1	1	27.1811	72	2	43.4785	0.387281	20.5337	17.0708	1.51532	12.3177	0.148336	2.27051	3.6091	6.28974	23.3545	11.0831	8.56686	1.89601	8.56025	46.1538	201.36	12.5531	1459.46	353.628
Med028	1	1	27.2613	72	3	43.5627	0.529241	20.8618	17.1164	1.65799	12.0318	0.133865	2.16338	3.41893	6.31565	23.0937	11.0578	8.37482	1.91939	8.47903	12.3874	118.287	7.9483	1115.97	263.28
Med029	2	1	17.9716	67	1	43.7457	0.536418	17.9341	14.2115	2.31348	9.01059	0.155531	1.16516	2.22586	5.46404	28.9384	15.002	9.42856	3.21159	6.6292	41.0796	127.768	41.837	1022.56	320.036
Med029	2	1	17.9716	67	2	43.9553	0.361299	18.8817	14.9324	2.18025	11.0958	0.109287	2.28598	2.78612	5.91444	25.9064	13.1462	8.70298	2.33479	8.20041	154.584	124.12	16.0216	1453.73	502.704
Med029	2	1	18.2063	67	3	43.9509	0.3511	18.8132	14.9599	2.12361	10.2628	0.114189	1.67986	2.65733	5.81137	26.813	14.1349	8.48479	2.61265	7.49123	44.7468	109.297	21.4058	421.622	271.742
Med030	2	2	24.9922	76	1	43.4714	0.626691	18.3671	15.0681	1.706	11.5028	0.176872	1.95996	3.03977	6.32618	26.1942	11.1113	10.9431	2.2772	8.28614	30.921	138.123	3.81986	864.346	520.674
Med030	2	2	25.3191	77	2	43.7774	0.451401	18.6016	15.1655	1.6849	11.499	0.222221	1.84395	3.1482	6.28464	25.8485	11.4622	10.1268	2.24789	8.12859	12.282	235.16	2.5314	550.192	423.104
Med030	2	2	25.2595	77	3	44.1455	0.529075	18.1409	15.0058	1.57348	11.7494	0.201353	1.95159	3.10948	6.48701	25.583	10.9992	10.2959	2.17738	8.4386	18.8164	123.925	5.22452	718.274	637.26
Med031	2	1	32.7613	65	1	43.0207	0.652135	18.9798	15.4317	1.82338	10.5438	0.159532	1.68191	3.04689	5.65547	26.9665	11.9864	10.7648	2.55757	7.33738	6.16968	88.4772	3.27152	649.788	314.702
Med031	2	1	32.4823	65	2	42.8956	0.643533	19.099	15.5839	1.68478	12.3689	0.146585	2.41943	3.30813	6.49472	25.1796	11.3577	9.94542	2.03572	8.91415	29.1788	175.14	12.5563	999.82	353.314
Med031	2	1	32.841	65	3	42.7351	0.54707	19.4051	15.7945	1.56993	12.3906	0.150848	2.16416	3.30823	6.76739	25.1233	11.0456	10.3183	2.02761	8.93155	38.2974	214.676	23.8434	719.142	373.796
Med032	2	1	21.456	74	1	42.1067	0.692574	19.5599	16.1251	1.88224	7.72362	0.140523	0.889353	2.57739	4.11635	30.0645	13.1317	12.1374	3.89254	5.0057	17.2296	202.864	19.2862	512.874	362.99
Med032	2	1		74	2
Med032	2	1		74	3
Med033	1	2	25.493	65	1	43.2795	0.764691	17.9942	14.846	1.7414	8.46018	0.156608	0.896243	2.66476	4.74257	29.6633	13.6356	10.3607	3.50623	5.63882
Med033	1	2	25.3347	66	2	44.0531	0.624838	18.7346	15.6308	1.62235	7.97503	0.120378	0.824738	2.57724	4.45267	28.8182	13.6865	9.43093	3.61356	5.27741	8.5705	120.041	6.97246	799.58	355.474
Med033	1	2	25.5506	66	3	44.2034	0.621096	18.3296	15.4428	1.48122	7.94467	0.149972	0.883231	2.69454	4.21692	29.1492	13.5608	9.63706	3.66903	5.10015	5.81	134.813	10.0254	1041.93	343.726
Med034	2	1	24.9499	69	1	43.2668	0.570316	17.609	14.2167	1.54685	10.8356	0.191206	1.76303	2.67047	6.21089	27.9265	12.4324	11.6067	2.57729	7.97392	35.4214	104.118	3.91006	574.568	654.47
Med034	2	1	25.6539	69	2	42.8784	0.69342	17.0987	13.8338	1.53003	9.75308	0.19877	1.3933	2.59499	5.56602	29.7224	12.9306	12.7644	3.04749	6.95931	14.0345	85.6692	6.7084	385.13	376.946
Med034	2	1	25.4302	69	3	42.549	0.565303	17.7812	14.5964	1.44635	11.354	0.230446	2.20608	2.58192	6.33553	27.9389	12.1989	11.9079	2.46072	8.54161	48.6522	176.542	4.1052	842.284	816.694
Med035	1	1	29.0673	68	1	43.0179	0.482748	18.3847	15.181	1.74361	8.68042	0.191854	1.40857	2.78462	4.29538	29.6205	11.3768	12.6881	3.41234	5.70395	7.03088	161.009	5.89342	504.71	335.996
Med035	1	1	28.7353	68	2	42.6636	0.347823	19.7771	16.1753	1.94925	9.64141	0.158603	1.68674	2.71505	5.08103	27.8296	11.2912	11.5594	2.88646	6.76776	15.8621	143.897	4.76486	446.588	426.808
Med035	1	1	28.5696	68	3	42.1456	0.420537	20.5818	17.1852	1.68109	9.76608	0.123448	1.73845	2.79684	5.10734	27.4142	11.2112	11.102	2.80708	6.84579	17.0584	151.161	12.7644	271.79	403.564
Med036	1	2	27.9786	70	1	43.5528	0.573756	19.3151	16.0448	1.76802	8.69365	0.31425	1.15937	2.99621	4.22382	28.0009	10.2605	12.4401	3.22085	5.38319	4.68904	204.866	7.75162	649.35	277.126
Med036	1	2	27.7556	70	2	42.2408	0.359515	19.771	16.5711	1.68327	8.18474	0.220789	0.801513	3.19523	3.96721	29.4439	11.6341	11.7355	3.59741	4.76872	5.55284	142.309	6.27966	370.548	276.132
Med036	1	2	27.4267	70	3	41.8993	0.342616	19.5421	16.5039	1.63968	8.34284	0.212751	0.800677	3.27786	4.05155	29.8731	12.2052	11.5586	3.58069	4.85223	5.18546	99.0028	7.25008	420.39	254.764
Med037	2	2	24.6652	66	1	43.9739	0.579611	15.8995	13.3961	1.41291	21.4709	0.162555	7.81001	4.83134	8.667	18.076	7.59508	8.74684	0.841885	16.477	12.5725	117.767	5.9583	786.842	367.006
Med037	2	2	24.0215	66	2	45.5777	0.2879	15.7936	13.3202	1.30567	21.8389	0.159587	7.36677	5.13246	9.18009	16.5019	7.74423	6.91184	0.755619	16.5469	12.4041	107.27	4.42764	738.588	414.178
Med037	2	2	24.1009	67	3	45.0838	0.327882	15.3833	12.9878	1.23269	22.3347	0.143993	8.12153	4.90736	9.1618	16.8703	7.59235	7.3847	0.755343	17.2833	12.5966	120.209	5.93982	1152.04	527.204
Med038	2	1	24.4514	65	1	43.5253	0.285892	17.2626	14.5108	1.46722	15.2976	0.126384	3.69785	4.02192	7.45144	23.6286	9.29461	11.2925	1.54459	11.1493	38.519	186.278	8.65382	803.568	428.648
Med038	2	1	24.4514	65	2	41.9029	0.280542	18.9174	15.9272	1.57646	13.5009	0.163185	2.73504	3.5179	7.08478	25.3982	10.5277	11.2931	1.88123	9.81982	45.6602	208.046	12.3277	1753.2	657.164
Med038	2	1	24.5212	65	3	42.1526	0.138414	18.7607	15.6362	1.47175	11.4151	0.1416	1.84693	2.99017	6.43639	27.5332	11.211	12.1992	2.412	8.28332	25.366	140.033	20.9186	783.638	350.992
Med039	1	1	26.7803	66	1	42.7283	0.376635	19.2366	16.068	1.68096	8.43843	0.086444	0.695998	2.22856	5.42743	29.2201	14.872	8.56292	3.46274	6.12343	5.94468	284.23	3.97602	696.926	363.99
Med039	1	1	26.1983	66	2	42.7293	0.128142	19.8074	16.6301	1.58427	9.18061	0.093822	0.850404	2.41065	5.82574	28.1545	14.5687	8.20767	3.06674	6.67614	11.8536	499.288	2.87886	735.768	345.89
Med039	1	1	26.532	66	3	42.2251	0.101579	20.047	16.9781	1.61541	8.89759	0.094722	0.761942	2.50104	5.53989	28.7287	14.2461	9.17464	3.22882	6.30183	18.6734	213.868	3.49392	731.828	407.388
Med040	1	1	25.0173	76	1	42.7533	0.502481	17.7407	15.0149	1.47794	10.1374	0.1568	1.1772	3.06773	5.73562	28.8661	13.0598	10.9893	2.8475	6.91282	8.17604	97.4686	7.05772	1109.49	369.764
Med040	1	1	24.2336	76	2	42.3096	0.381773	18.5068	15.6867	1.34125	10.2712	0.138027	1.14743	3.15947	5.82632	28.5305	13.3636	10.4577	2.77771	6.97375	4.5589	162.581	3.10382	1154.21	292.214
Med040	1	1	24.4839	76	3	42.2748	0.31317	18.486	15.6435	1.44114	9.85517	0.194377	1.1953	2.89814	5.56736	29.0708	12.9151	11.696	2.9498	6.76266	9.74636	162.239	8.05192	875.948	537.552
Med043	1	1	29.8404	69	1	42.3331	0.131112	20.1548	16.8186	1.70334	12.2534	0.116507	1.81354	3.67937	6.64401	25.1275	11.8038	9.08451	2.05065	8.45755	10.7338	94.4072	5.01392	451.902	308.368
Med043	1	1	29.694	69	2	42.675	0.200082	20.956	17.4769	1.62269	12.9003	0.128258	2.26421	3.37822	7.12957	23.2686	10.9596	8.62556	1.80373	9.39379	14.7293	90.7686	7.0628	1004.48	392.784
Med043	1	1	29.7552	69	3	42.356	0	20.3382	17.1803	1.58788	13.1839	0.150045	2.20002	3.64347	7.19032	24.1219	10.9265	9.53319	1.82966	9.39034	8.45972	100.487	6.918	800.526	319.614
Med044	2	1	29.8624	67	1	41.6518	0.198271	19.9404	16.7426	1.79613	10.7237	0.131322	2.04449	3.00544	5.5424	27.4859	12.52	11.2525	2.56311	7.58689	9.56818	107.885	5.28284	405.41	316.026
Med044	2	1	29.0551	67	2	42.269	0.164946	20.9661	17.6255	1.66384	12.1663	0.125715	2.45448	3.27671	6.30935	24.4336	11.5813	9.7385	2.00831	8.76384	6.29458	100.535	4.1197	847.63	346.646
Med044	2	1	29.4597	68	3	42.3335	0.158535	20.5062	17.2823	1.66211	12.1196	-	2.6135	3.02305	6.48306	24.8822	11.4	10.45	2.05305	9.09656	7.49684	99.0026	4.74012	930.464	278.76
Med045	1	1	24.6182	68	1	43.1676	0.482829	18.8116	15.8278	1.45004	9.00126	0.154368	0.901885	2.9573	4.9877	28.5367	11.789	10.5134	3.17031	5.88959	14.643	78.7678	4.57818	466.602	434.698
Med045	1	1	24.5469	68	2	42.8046	0.308037	19.4	16.0322	1.71093	8.85996	0.161437	0.864478	2.62598	5.20806	28.6274	11.2707	11.4203	3.2311	6.07254	30.5116	80.0554	8.86272	1058	557.588
Med045	1	1		68	3
Med046	1	1	28.6108	67	1	43.0504	0.293094	18.4925	15.4511	1.49441	8.2415	0.188127	1.01463	3.05691	3.98183	29.9225	11.6046	11.8807	3.63072	4.99646	11.2028	391.312	12.4982	619.644	267.166
Med046	1	1	28.1867	67	2	42.9467	0.189279	18.8034	15.6727	1.36257	8.29775	0.145413	0.861488	2.97024	4.32061	29.7629	11.5349	11.7169	3.58686	5.1821	16.8158	320.874	28.4538	757.822	368.194
Med046	1	1	28.0928	67	3	42.7478	0.258467	18.4424	14.9733	1.36726	8.57798	0.173471	0.954704	2.90118	4.54862	29.9734	11.4598	11.9961	3.49422	5.50332	15.1426	337.418	30.8406	597.7	286.656
Med047	2	2	26.7165	73	1	42.7011	0.27821	20.3903	16.8694	1.92608	7.9703	0.176959	0.969503	2.63572	4.18812	28.6601	12.7785	10.6114	3.59586	5.15762	37.4242	112.932	11.3956	1165.95	396.29
Med047	2	2	26.358	73	2	43.3079	0.328034	19.5763	16.0302	1.79042	7.99512	0.139167	0.839481	2.50582	4.51065	28.7926	13.3643	9.98203	3.60127	5.35013	25.563	128.254	21.9824	927.108	353.474
Med047	2	2	26.2074	73	3	43.7786	0.298892	20.2222	16.5893	1.82307	8.22242	0.146567	0.858938	2.68772	4.52919	27.4779	13.0868	8.98961	3.34182	5.38813	24.8172	105.874	18.9652	1346.12	358.82
Med048	1	2	29.7884	65	1	42.7477	0.235166	19.2808	15.4238	1.59633	9.02803	0.110307	0.689324	2.52709	5.70132	28.7083	13.562	9.24591	3.17991	6.39064	3.64968	150.727	2.92854	309.12	213.748
Med048	1	2	30.1659	66	2	42.9043	0.268876	19.6002	15.7346	1.65114	8.76678	0.132611	0.7811	2.29584	5.55724	28.4598	12.6621	10.0401	3.24632	6.33834	3.41818	82.8448	4.09534	429.938	276.656
Med048	1	2	30.0151	66	3	42.4928	0.207474	19.1588	15.2755	1.5027	8.89991	0.181052	0.7909	2.28117	5.64679	29.2411	13.0114	10.7344	3.28555	6.43769	6.81752	178.481	11.6324	359.182	219.184
Med049	1	2	24.403	66	1	43.2334	0.411846	18.7307	15.4462	1.32857	8.53144	0.153404	0.859467	2.73466	4.78391	29.0926	12.141	12.9937	3.41005	5.64338	9.9375	116.957	3.53756	569.566	339.046
Med049	1	2	24.363	66	2	43.3674	0.438628	18.6253	15.6524	1.26332	7.97938	0.192248	0.786408	2.70713	4.2936	29.5893	12.0237	13.3112	3.70821	5.08	6.88176	151.432	9.41594	792.934	285.848
Med049	1	2	23.7753	66	3	43.0059	0.463878	18.7756	15.7252	1.37317	8.14328	0.191902	0.759597	2.64216	4.54962	29.6114	11.8459	13.7772	3.63629	5.30922	13.6612	97.2342	9.32866	1014.01	521.418
Med050	2	2	24.9968	70	1	43.4202	0.41134	18.6077	15.4483	1.31947	8.53489	0.142616	0.838488	2.74281	4.81098	29.0259	12.2156	12.8374	3.40085	5.64947	41.1482	513.894	5.69384	879.31	767.042
Med050	2	2	24.8522	70	2	42.9561	0.304616	19.6354	16.4177	1.40636	9.895	0.158124	1.41793	2.7905	5.52844	27.2089	12.9549	10.2	2.74976	6.94637	12.2057	176.027	12.3814	563.296	772.8
Med050	2	2	24.8802	70	3	42.7618	0.273113	19.2034	15.9743	1.39847	10.3703	0.169601	1.51732	2.98088	5.70249	27.3914	12.9626	10.3287	2.64134	7.21981	20.3116	94.5284	6.25092	842.316	693.578
Med051	2	2	42.625	70	1	43.3557	0.300612	19.1587	15.5411	1.60263	13.5363	0.162724	2.74167	3.37666	7.25522	23.6488	10.7555	8.88468	1.74707	9.99689	3.94648	111.506	3.60442	269.78	295.756
Med051	2	2	42.4049	71	2	43.4046	0.313066	18.9503	15.4955	1.48956	12.9938	0.146547	2.69846	3.16532	6.98348	24.3382	10.5031	9.83387	1.87306	9.68194	6.54262	124.748	6.18652	350.38	869.318
Med051	2	2	41.5396	71	3	42.8486	0.282339	19.1306	15.5839	1.65249	13.218	0.175043	2.86045	3.08704	7.09547	24.5205	10.201	10.486	1.85508	9.95592	6.13574	134.77	5.0113	597.474	337.012
Med053	2	2	32.5513	66	1	42.8656	0.281971	17.4353	14.1402	1.56988	9.98383	0.102926	0.923596	2.23717	6.72014	29.4333	13.1446	10.9261	2.9481	7.64374	51.8472	326.728	4.00544	686.78	541.708
Med053	2	2	32.4682	66	2	43.7139	0.316362	18.1408	14.9207	1.45309	9.65626	0.130234	1.01319	2.31268	6.20016	28.1727	12.4279	10.3346	2.91756	7.21335	60.5402	128.449	5.46142	306.908	592.562
Med053	2	2	32.1898	67	3	43.228	0.25914	18.8191	15.4959	1.56813	8.73623	0.142646	0.852755	2.15541	5.58541	28.9575	12.3023	11.1898	3.31465	6.43817	23.6952	109.502	4.48314	312.488	574.054
Med054	2	1	35.5566	66	1	43.3494	0.454446	20.4661	16.9113	1.83817	8.89166	0.182627	1.0914	2.84309	4.77454	26.8384	11.8071	10.3884	3.01837	5.86594	16.3913	98.2428	6.55202	568.088	681.632
Med054	2	1	35.2212	66	2															0
Med054	2	1	35.219	66	3	43.2364	0.38086	19.5201	16.3611	1.54324	9.30505	0.194098	1.23036	3.00273	4.87786	27.5575	11.3712	11.5884	2.96157	6.10822	9.55796	90.9688	24.6682	547.486	506.166
Med056	2	2	25.0386	77	1	43.6005	0.341992	20.0807	16.7336	1.64405	8.58174	0.242281	0.855503	2.70436	4.67876	27.3951	11.3387	11.2625	3.19225	5.53426	32.047	92.605	6.80428	543.968	605.576
Med056	2	2	23.8798	77	2	43.4749	0.35564	19.9135	16.5644	1.60746	8.38285	0.215686	0.77232	2.71343	4.68141	27.8731	11.5629	11.285	3.32502	5.45373	12.8783	264.796	17.4059	1010.38	696.25
Med056	2	2	23.9685	77	3	43.5633	0.351116	19.9571	16.7176	1.47849	8.07732	0.226132	0.748053	2.40069	4.59773	28.0512	11.6128	11.3751	3.47283	5.34578	16.059	143.608	10.3219	819.524	945.284
Med059	2	1	24.8482	70	1	43.9142	0.288403	17.4207	14.7757	1.38667	10.8591	0.220754	1.57204	3.25999	5.80636	27.5175	12.3422	10.3499	2.53404	7.3784	9.08852	291.372	8.4399	407.588	328.838
Med059	2	1	24.9289	70	2	43.0009	0.2097	18.5437	15.8368	1.42578	11.0604	0.237318	1.86086	2.83045	6.13177	27.1853	11.8789	10.7017	2.4579	7.99263	11.5597	226.382	7.47144	545.244	384.046
Med059	2	1	25.0658	71	3	42.7411	0.243513	18.0376	15.3038	1.47851	10.6799	0.220992	1.65815	2.8345	5.96625	28.2979	12.4063	11.1927	2.64964	7.6244	10.7949	217.934	10.3654	1188.1	640.596
Med060	2	1	29.5455	65	1	42.4799	0.365062	18.4503	15.7068	1.54669	10.3884	0.118765	1.46789	2.66036	6.14137	28.3164	14.5728	9.01686	2.72577	7.60925	11.8592	130.752	5.26022	1482.3	337.002
Med060	2	1	28.7712	66	2	42.003	0.32131	19.21	16.2828	1.6023	10.0401	0.110242	1.07557	2.48898	6.36532	28.4256	14.6772	9.31038	2.8312	7.44089	19.5534	242.83	14.0026	1476.55	728.824
Med060	2	1	28.6179	66	3	41.6684	0.423875	19.5632	16.569	1.61694	9.83805	0.161979	1.19461	2.47826	6.0032	28.5064	14.0946	9.85593	2.89757	7.19781	12.2656	201.82	7.29008	917.58	586.358
Med061	1	2	29.7531	70	1	41.4971	0.438347	19.9397	16.7832	1.76893	10.0759	0.151911	1.48741	2.91967	5.51687	28.049	13.8446	9.7639	2.78378	7.00429	4.60236	152.742	3.4325	408.53	356.954
Med061	1	2	29.537	70	2	42.3066	0.408165	19.5829	16.3822	1.60927	11.1163	0.131268	1.8146	3.08701	6.0834	26.586	13.89	8.31771	2.39163	7.898	5.3718	130.589	13.0287	304.178	285.86
Med061	1	2	28.9146	70	3	42.8911	0.215343	19.1538	16.2137	1.51957	13.3307	0.149867	3.86272	3.14043	6.17773	24.4091	13.1221	7.24471	1.83104	10.0404	14.4827	138.127	9.8624	456.726	532.848
Med062	2	1	25.4097	72	1	42.7994	0.219673	18.3533	15.7029	1.39276	7.40513	0.132341	0.649672	2.53777	4.08535	31.2226	12.9905	12.3234	4.21635	4.73502	5.92666	325.808	3.76752	557.532	435.974
Med062	2	1	25.4097	72	2	43.0195	0.321626	18.5914	15.873	1.44386	7.69783	0.151341	0.747657	2.54176	4.25707	30.3696	12.7118	11.5912	3.94521	5.00472	3.90018	117.509	4.93092	538.958	188.252
Med062	2	1	25.4886	72	3	42.8015	0.36142	19.1329	16.4225	1.42794	7.55746	0.217509	0.719497	2.53098	4.08948	30.1467	12.3647	11.6763	3.989	4.80897	14.5872	130.972	4.18118	1220.05	638.532
Med063	2	2	22.7384	73	1	43.9773	0.321598	16.7277	13.9418	1.48091	12.2542	0.145881	2.0386	2.73425	7.33551	26.7191	13.2379	8.66535	2.1804	9.37411	6.81724	211.33	9.53356	793.424	778.56
Med063	2	2	22.1039	74	2	44.2125	0.265088	17.5541	14.6406	1.51031	11.0096	0.149353	1.52032	2.5799	6.76004	26.9587	12.8965	9.29749	2.44865	8.28036	11.5791	164.012	16.7237	352.108	701.35
Med063	2	2	22.042	74	3	43.5692	0.303747	16.7521	13.5442	1.70426	11.0091	0.117185	1.39975	2.5488	6.94333	28.3659	14.1299	9.17708	2.5766	8.34309	8.21396	106.386	20.0142	775.824	673.03
Med064	2	1	27.1589	76	1	43.5227	0.308359	18.0463	14.6206	1.75278	10.2452	0.181407	1.31744	2.99708	5.74929	27.8774	12.7251	10.1596	2.72102	7.06673	3.8291	249.694	5.21054	865.724	487.716
Med064	2	1	26.8101	76	2	43.6472	0.200772	18.4647	15.1367	1.68902	9.94125	0.160771	1.1099	3.00554	5.66503	27.7461	13.1709	9.43015	2.79101	6.77493	4.51936	144.084	3.2624	598.304	509.64
Med064	2	1	26.7335	76	3	43.3164	0.265076	18.3048	14.9929	1.64303	9.56849	0.169884	1.2775	3.0073	5.11381	28.5452	12.2938	11.1408	2.98325	6.39131	12.5111	169.839	3.51468	643.43	454.066
Med065	2	2	22.0829	69	1	43.0507	0.332699	18.9254	15.8996	1.56274	7.76842	0.141989	1.04645	2.31104	4.26894	29.9228	12.9731	12.0267	3.85185	5.31539	21.8056	147.513	12.4489	433.666	344.82
Med065	2	2	22.021	69	2	42.4934	0.355908	18.9356	15.8168	1.66245	7.82204	0.164997	0.977789	2.40092	4.27833	30.3931	13.8613	11.4444	3.88557	5.25612	6.10758	129.592	11.9538	281.97	353.186
Med065	2	2	21.2003	69	3	42.4815	0.292374	18.5055	15.435	1.64834	7.78636	0.175901	1.10896	2.42254	4.07897	30.9343	13.5327	12.2697	3.97288	5.18793	6.20766	87.5576	11.3858	258.804	441.982
Med066	2	1	33.6229	66	1	42.2056	0.327879	18.6726	15.5992	1.55371	8.03427	0.125112	1.1623	2.26707	4.4798	30.7597	13.4882	12.2107	3.82856	5.64209	43.9854	135.59	3.45074	569.678	231.834
Med066	2	1		66	2
Med066	2	1		66	3
Med067	2	1	24.3882	74	1	43.8765	0.324223	16.8765	13.9139	1.70495	11.0316	0.230688	1.74199	2.94466	6.11425	27.8912	12.0018	11.6418	2.5283	7.85624	5.80804	127.107	8.05248	454.54	535.184
Med067	2	1	23.858	74	2	44.1903	0.284765	17.1261	13.9599	1.59014	11.1854	0.159459	1.58201	2.8189	6.62501	27.2134	12.3255	10.9743	2.43295	8.20702	3.28204	93.521	15.8972	448.666	437.112
Med067	2	1	23.8039	74	3	43.9429	0.268062	17.2661	14.1375	1.61047	11.154	0.22605	1.57802	2.81205	6.53786	27.3689	12.03	11.1214	2.45374	8.11588	13.6824	130.234	7.39488	639.14	485.882
Med068	1	1	25.8361	78	1	43.4485	0.181201	17.0175	14.4088	1.48112	18.7337	0.109358	5.86183	4.36778	8.39469	20.6192	8.34042	10.1217	1.10065	14.2565	8.32022	243.592	4.36218	548.39	442.13
Med068	1	1		78	1
Med068	1	1		79	2
Med069	2	1	28.4287	72	1															0
Med069	2	1		72	2
Med069	2	1		72	3
Med070	2	2	32.5733	70	1															0
Med070	2	2	33.4808	70	2	44.0641	0.165796	18.1525	15.3446	1.34013	13.9891	0.139848	3.24311	3.00779	7.59834	23.6285	9.89292	10.2195	1.68907	10.8414	20.8418	151.563	4.65048	588.842	494.436
Med070	2	2	33.8572	70	3	43.6251	0.115187	18.239	15.4346	1.3128	15.4081	0.146735	3.82263	3.30927	8.12946	22.6126	9.16425	10.3712	1.46758	11.9521	16.305	110.227	6.4569	899.97	612.92
Med072	2	1	22.6342	65	1	41.7939	0.748248	19.2424	15.8862	1.70843	8.81683	0.204544	1.12138	3.15485	4.33606	29.3986	13.2647	11.4752	3.33438	5.45744	7.60028	101.153	4.60182	449.562	694.016
Med072	2	1	22.2336	65	2	42.7757	0.366366	19.3541	16.1443	1.54332	9.06689	0.157263	0.971525	2.91429	5.02381	28.4369	12.4015	11.6202	3.13635	5.99534	6.35112	112.165	3.07096	390.516	640.656
Med072	2	1	22.4974	65	3	42.5714	0.242142	19.4208	16.3364	1.45995	8.49499	0.214299	1.13094	2.83832	4.31144	29.2707	12.0441	12.5743	3.44565	5.44238	9.40396	93.9414	7.18008	1095.65	816.652
Med073	2	2	23.4362	75	1	43.0315	0.174779	18.1483	15.094	1.50196	9.32697	0.137036	0.951358	2.57082	5.66776	29.3184	11.621	12.4929	3.1434	6.61912	2.23508	182.334	5.33402	348.844	720.204
Med073	2	2	23.345	75	2	42.6937	0.162264	18.1605	15.1854	1.6568	10.2483	0.153253	0.930058	2.68286	6.48209	28.7353	11.7243	12.123	2.80392	7.41214	11.5149	103.607	9.3924	349.008	544.296
Med073	2	2	23.6909	75	3	42.8442	0.199628	18.4253	15.6653	1.55185	9.07643	0.166456	0.712634	2.61708	5.58026	29.4545	11.4208	12.9232	3.24516	6.2929	12.5434	119.988	3.0482	426.236	1208.44
Med074	1	2	25.8843	68	1	43.0104	0.21523	18.444	15.7934	1.28069	8.07889	0.131953	0.923891	2.67654	4.34651	30.2514	13.5864	11.2558	3.7445	5.2704	4.54176	127.5	4.01138	522.71	360.794
Med074	1	2	26.474	68	2	43.3588	0.351621	18.0791	15.527	1.26548	8.0904	0.152466	0.978351	2.698	4.26158	30.1201	13.2722	11.6302	3.72294	5.23993	5.1295	131.946	7.67558	688.584	302.51
Med074	1	2	26.4359	69	3	43.1871	0.164181	18.4031	15.6022	1.28768	8.09108	0.157539	0.919932	2.68784	4.32577	30.1546	13.9434	10.8365	3.7269	5.2457	4.93442	85.536	2.94608	280.798	584.894
Med075	1	2	31.2324	82	1	42.9611	0.364624	17.1109	14.0354	1.35275	7.2824	0.149851	0.811543	2.22035	4.10066	32.2809	13.1156	13.6291	4.43273	4.9122	8.0644	108.86	5.62144	366.802	518.05
Med075	1	2	31.2421	82	2	42.7152	0.314684	17.7334	14.5861	1.43616	7.79319	0.118037	0.939084	2.37561	4.36045	31.4435	13.621	12.1215	4.03475	5.29954	21.6222	143.374	6.4424	866.602	536.238
Med075	1	2	31.5987	82	3	43.072	0.331498	17.0639	14.1328	1.34514	7.93498	0.175258	0.93343	2.37745	4.44884	31.5976	13.3121	13.0308	3.98206	5.38227	12.0601	95.5446	6.8733	729.87	589.308
Med076	2	2	27.2872	64	1	40.4825	0.491476	19.9203	16.9035	1.69219	9.92133	0.198187	1.45942	2.21748	6.04625	29.1843	13.5758	12.0703	2.94157	7.50567	9.5798	183.48	7.65096	786	457.53
Med076	2	2	27.7968	65	2	42.7043	0.447653	20.4964	17.5859	1.56203	9.66414	0.113262	1.34789	2.21125	5.99174	26.6876	13.0082	9.85889	2.76151	7.33963	9.07808	145.763	10.0117	891.874	433.706
Med076	2	2	27.1356	65	3	41.7563	0.339979	20.1251	17.0715	1.68763	10.2872	0.169047	1.51512	2.19197	6.4111	27.4913	14.2851	9.64935	2.67237	7.92622	9.02302	182.571	15.896	827.868	655.624
Med077	1	1	22.637	79	1	44.0295	0.227346	17.1415	14.4273	1.488	9.52783	0.124699	1.1427	2.69797	5.56247	29.0739	12.5515	11.7599	3.05147	6.70517	4.3004	248.918	4.29256	500.744	287.788
Med077	1	1	23.1983	79	2	42.2336	0.14556	19.3131	16.2953	1.51977	9.70129	0.13205	1.3361	2.55015	5.68298	28.6065	11.9547	11.9619	2.94873	7.01908	5.17052	160.932	11.1199	903.226	214.71
Med077	1	1	23.4452	80	3	41.8831	0.360535	19.5874	16.4965	1.5663	8.99232	0.128684	1.09991	2.41479	5.34893	29.1766	12.0599	12.2112	3.24462	6.44884	4.06898	138.843	4.65052	645.02	263.608
Med078	1	2	30.5021	77	1	43.5006	0.605423	16.2603	13.4691	1.36256	8.31864	0.222232	0.774623	3.0717	4.25009	31.315	13.4258	12.6497	3.76444	5.02471	44.6556	34.0974	57.2848	497.862	478.486
Med078	1	2	29.3586	78	2	42.5221	0.659541	17.0485	13.9957	1.61663	7.97217	0.211415	0.7216	2.94012	4.09904	31.7977	13.0215	13.9203	3.98859	4.82064	83.6546	90.4808	44.866	1390.94	777.692
Med078	1	2	28.304	78	3	42.8131	0.612906	17.1953	14.0138	1.43768	8.33892	0.192708	0.767501	2.99972	4.37899	31.0399	12.9881	13.0911	3.72229	5.14649	55.7392	34.1324	22.9812	532.456	496.832
Med079	2	2	27.2932	79	1	43.5121	0.37432	17.9602	14.9644	1.43631	8.80977	0.178064	0.829887	2.74762	5.0542	29.3436	12.499	11.3508	3.3308	5.88409	97.7796	118.403	164.312	1744.41	746.776
Med079	2	2	26.1102	80	2	42.6835	0.338101	19.4973	16.443	1.74606	8.55455	0.156689	0.821691	2.45101	5.12516	28.9265	11.952	11.7749	3.38142	5.94685	143.486	94.3904	74.621	1747.51	1119.66
Med079	2	2	25.2673	80	3	42.8329	0.388012	18.9249	16.2704	1.48905	9.73371	0.133864	1.00643	2.68509	5.90833	28.1205	12.363	10.7162	2.88898	6.91476	111.362	251.44	201.352	4619.74	747.741
Med080	1	1	27.5055	67	1	43.2355	0.366163	18.7016	16.1274	1.39941	8.09577	0.204898	0.920244	2.69008	4.28055	29.6009	12.817	11.4066	3.65634	5.20079	124.663	222.05	133.753	1521.42	992.546
Med080	1	1	27.9979	68	2	42.6632	0.352811	18.649	15.9743	1.33793	10.0949	0.12887	1.20214	2.58358	6.18032	28.2401	12.6654	10.8254	2.79747	7.38246	83.0574	251.276	92.1266	1941	738.707
Med080	1	1	29.0017	68	3	42.8053	0.388304	19.0035	16.2951	1.34748	10.6883	0.181403	1.81306	2.78503	5.90883	27.1146	11.5336	11.1772	2.53684	7.72189	59.2936	526.792	179.561	2180.2	365.208
Med081	2	2	28.7428	72	1	43.2531	0.458575	18.0779	15.5563	1.3793	12.6801	0.162972	2.26499	3.15849	7.09368	25.5303	10.4885	11.5176	2.01341	9.35867	170.56	1437.15	923.104	13694.3	972.803
Med081	2	2	28.1828	73	2	43.2164	0.369447	18.3771	15.7738	1.38739	13.2829	0.128968	2.7754	3.21265	7.16588	24.7542	10.6704	10.7394	1.86361	9.94128	190.935	233.802	125.728	1862.8	1447.68
Med081	2	2	28.1646	73	3	43.6997	0.323968	18.1503	15.6317	1.22893	13.5992	0.14581	2.81297	3.30002	7.34038	24.2269	10.7358	9.97903	1.7815	10.1533	155.83	150.212	137.26	3174.92	1453.97
Med082	1	2	27.6421	69	1	42.8594	0.421973	19.3898	16.3429	1.86041	11.5276	0.147174	1.87265	3.46856	6.03923	25.8013	11.2392	10.7128	2.23822	7.91188	85.19	391.038	121.767	633.192	810.76
Med082	1	2	27.0037	70	2	43.4907	0.256997	18.4279	15.7593	1.44228	11.7744	0.127407	2.00049	3.51916	6.1273	26.05	12.0582	9.99941	2.21244	8.12779	75.6344	390.958	98.6916	523.206	643.486
Med082	1	2	27.5783	70	3	43.7498	0.427261	18.3423	15.684	1.49277	11.9095	0.16074	2.24529	3.55246	5.95096	25.5711	11.9743	9.23983	2.14713	8.19625	80.0542	201.33	93.8232	440.252	946.258
Med083	2	1	26.5794	77	1	41.8339	0.402522	18.2918	15.2505	1.82236	9.48576	0.276012	0.98645	2.487	5.7363	29.8969	10.3766	15.2407	3.15177	6.72275	136.064	179.204	101.818	1050.78	906.958
Med083	2	1	26.0544	77	2	42.2906	0.281265	17.8508	14.7736	1.59217	11.0583	0.207006	1.19845	2.58372	7.06908	28.5191	10.2189	14.2599	2.57898	8.26752	152.725	133.959	126.337	1442.37	1190.77
Med083	2	1	26.7986	77	3	41.4626	0.412793	19.5429	16.2533	1.81526	9.77573	0.235726	0.909324	2.35447	6.27621	28.8059	9.77665	14.7877	2.94668	7.18553	93.44	261.05	153.866	1434.55	1173.97
Med084	2	1	25.092	68	1	42.6228	0.400323	19.1214	16.0578	1.71904	10.9174	0.133509	1.66804	2.97419	6.14169	26.9381	12.0729	10.37	2.46744	7.80973	116.831	314.664	244.248	4091.16	739.481
Med084	2	1	25.4845	68	2	41.937	0.281413	19.7524	16.5842	1.64515	9.30836	0.153182	1.00309	2.61623	5.53585	28.7209	11.9312	12.03	3.08549	6.53895	131.306	75.9818	49.1244	357.088	827.796
Med084	2	1	25.1803	68	3	41.413	0.381141	19.6585	16.4081	1.64035	9.37264	0.164809	1.18824	2.40164	5.61795	29.1747	12.0432	12.0391	3.11275	6.80619	171.295	188.676	121.515	1568.91	914.278
Med085	2	1	34.0289	68	1	43.2754	0.306907	18.8111	15.4362	2.08399	10.1546	0.190711	1.16001	2.68842	6.11542	27.452	12.2476	10.524	2.70342	7.27543	35.075	0	0	67.2318	972.833
Med085	2	1	33.3286	68	2	42.4503	0.247909	19.8599	16.3213	2.13413	9.609	0.14325	0.962151	2.52075	5.98285	27.8329	12.4886	10.6676	2.89655	6.945	54.4266	161.983	112.723	1050.87	545.461
Med085	2	1	33.7534	68	3	42.6278	0.250161	20.3678	16.8425	1.99572	11.8365	0.159248	2.43585	2.80001	6.44136	24.9177	11.3314	9.44645	2.10517	8.87721	38.5642	51.2648	24.515	272.616	738.336
Med086	1	1	24.3616	66	1	43.531	0.458656	17.0074	14.2328	1.55943	8.91316	0.151503	0.734848	3.49208	4.53473	30.0897	12.462	11.826	3.37588	5.26958	88.9422	428.374	449.886	4219.03	393.552
Med086	1	1		66	2
Med086	1	1		66	3
Med087	1	1	19.1716	86	1	44.5899	0.55717	16.7973	14.0663	1.46868	15.2815	0.155141	3.29126	3.44721	8.38784	22.7742	10.6579	9.06847	1.49032	11.6791	59.548	331.998	299.708	3379.08	794.35
Med087	1	1	19.3094	86	2	59.8792	0.611858	27.8528	23.1988	2.52051	2.05589	0.059248	0.393529	0.475936	1.12718	9.90608	2.12661	6.79956	4.81839	1.52071	49.9836	153.128	198.256	1607.68	661.212
Med087	1	1	19.2219	86	3	43.0686	0.221189	18.9928	15.7681	1.67279	13.1243	0.176153	2.12707	3.13262	7.68844	24.5931	11.504	9.70597	1.87386	9.8155	71.0992	193.507	194.139	1714.91	896.564
Med088	2	1	22.7334	67	1	43.0213	0.320448	17.3721	14.3139	1.66054	15.6559	0.133614	3.8044	3.35547	8.36238	23.6304	11.5825	9.16495	1.50936	12.1668	66.4088	457.198	271.3	2903.74	318.104
Med088	2	1	22.5973	67	2	43.0104	0.30965	17.0579	13.9607	1.635	16.3985	0.142683	4.28918	3.52116	8.44544	23.2236	10.8682	9.67544	1.41621	12.7346	56.4346	281.334	191.733	2488.04	454.548
Med088	2	1	22.3514	67	3	42.359	0.288738	17.5727	14.3807	1.77597	15.6818	0.134881	4.02295	3.40969	8.11427	24.0978	10.9104	10.1476	1.53667	12.1372	64.8166	405.518	231.984	3298.84	292.899
Med089	2	1	22.0985	65	1	43.8729	0.216809	18.5429	15.7983	1.42852	8.99569	0.10067	1.39854	2.82471	4.67177	28.3717	13.0023	10.1665	3.15392	6.07031	79.5712	137.083	59.7976	719.104	310.808
Med089	2	1	21.742	65	2	44.3912	0.172579	18.4133	15.608	1.37144	10.0161	0.109917	1.50161	2.97327	5.43132	27.0068	12.4814	10.0527	2.69634	6.93293	105.668	403.87	126.977	1850.3	460.726
Med089	2	1	21.4925	65	3	44.6202	0.224839	19.4897	16.5942	1.44865	10.3609	0.142516	1.80386	3.06525	5.34931	25.3043	11.425	9.65125	2.44228	7.15316	95.7552	444.818	239.444	2713.85	295.496
Med090	1	1	27.5131	65	1	44.0262	0.484194	17.7411	15.1822	1.29087	10.3935	0.107503	1.24462	2.9673	6.0741	27.3549	12.0914	10.0509	2.63192	7.31872	59.8872	500.468	370.874	2441.41	254.178
Med090	1	1	27.7163	65	2	44.0948	0.283376	18.0553	15.3883	1.31831	11.6996	0.125087	1.98736	3.09744	6.48971	25.8669	11.8584	9.04434	2.21093	8.47706	49.5384	225.456	320.772	2345.49	248.992
Med090	1	1		65	3
Med091	1	1	21.8672	68	1	43.5712	0.342931	17.6357	14.9629	1.5322	9.23172	0.183085	0.992257	2.6515	5.40488	29.2185	12.6844	11.2475	3.16501	6.39714	73.7758	213.956	87.877	967.852	345.97
Med091	1	1	21.5971	68	2	42.125	0.26366	19.0008	16.0324	1.61564	8.99822	0.144896	0.763734	2.4072	5.68238	29.6123	12.7724	11.7508	3.29091	6.44612	90.6932	75.1738	128.865	596.54	458.161
Med091	1	1	21.9991	69	3	41.9645	0.276361	19.7848	16.642	1.60443	8.643	0.166676	0.843842	2.34835	5.28413	29.3313	12.7196	11.3914	3.39365	6.12797	86.9592	311.888	666.154	4151.71	365.109
Med092	2	2	29.1312	68	1	42.4939	0.415559	18.6038	15.1953	1.78623	10.4894	0.256786	1.04778	2.75665	6.42814	27.9973	12.9319	10.2448	2.66912	7.47592	42.6876	190.428	176.121	1258.88	560.465
Med092	2	2	29.0063	69	2	43.1455	0.548618	17.7203	14.4104	1.66161	11.5725	0.203861	1.51406	3.0887	6.76583	27.0132	12.803	9.64709	2.33427	8.27989	46.9144	615.652	565.826	3965.38	761.191
Med092	2	2	28.705	69	3	42.2667	0.501844	18.4341	15.0756	1.70598	11.7806	0.18995	1.59963	3.0214	6.96963	27.0167	12.5012	10.3856	2.29332	8.56926	30.753	273.912	86.7168	868.332	699.693
Med093	1	1	26.9284	76	1	44.0188	0.670833	17.0034	14.3312	1.52189	19.9686	0.125334	5.89883	4.72642	9.21805	18.3383	7.67489	8.32261	0.918354	15.1169	50.7532	223.328	163.248	1307.18	913.991
Med093	1	1	25.4977	76	2	43.3619	0.518281	17.6341	14.5385	1.76683	18.2125	0.147815	5.02036	4.48506	8.55927	20.2733	8.04838	9.8134	1.11315	13.5796	49.6614	233.556	203.096	1555.6	758.028
Med093	1	1	25.0767	76	3	43.1656	0.509296	18.0835	15.181	1.67148	18.6389	0.088666	5.73706	4.4872	8.32598	19.6027	7.87873	9.14418	1.05171	14.063	38.875	220.234	394.974	2223.83	693.718
Med094	2	1	29.5381	74	1	44.0838	0.50955	19.2674	16.7562	1.46441	18.2631	0.12472	5.06438	4.51842	8.55554	17.8761	8.02976	7.66414	0.978814	13.6199	59.8776	210.094	166.644	1673.42	560.429
Med094	2	1	28.0849	74	2	43.2348	0.368922	19.1192	16.4413	1.60321	18.2185	0.147917	5.32197	4.30399	8.44457	19.0586	8.65284	8.13712	1.04611	13.7665	47.9244	185.832	163.178	2048.46	409.342
Med094	2	1	27.5083	74	3	43.2689	0.504039	19.5442	17.0026	1.41889	18.1412	0.10858	5.70239	4.14696	8.18323	18.5417	8.34777	7.83284	1.02208	13.8856	44.456	102.901	199.444	1325.72	520.544
Med097	1	1	31.354	75	1	43.7296	0.478295	17.7515	15.0436	1.62086	13.1078	0.193777	2.70074	3.37807	6.83523	24.9327	8.3996	11.8772	1.90213	9.53597	66.6262	204.748	253.418	1575.45	365.986
Med097	1	1	31.5139	75	2	42.5624	0.397104	18.5276	15.6477	1.704	13.2366	0.203762	3.01749	3.10956	6.90582	25.2762	7.89863	12.8685	1.90957	9.92331	88.789	134.326	245.182	1410.83	498.479
Med097	1	1	31.6047	75	3	42.5212	0.53983	19.8261	16.7319	1.78141	12.3069	0.198069	2.59266	3.00661	6.50961	24.8059	8.19962	11.9432	2.0156	9.10227	102.464	116.147	217.18	1266.83	770.842
Med098	2	1	25.189	70	1	43.2147	0.740562	18.1201	15.3723	1.58205	15.795	0.147091	4.27681	3.82302	7.54805	22.1297	9.8865	9.14589	1.40106	11.8249	117.745	819.57	798.402	10258.3	448.786
Med098	2	1	24.9696	70	2	42.4496	0.716433	18.1733	15.3228	1.58776	17.0374	0.113135	5.05009	4.01943	7.85474	21.6232	9.72561	9.1296	1.26916	12.9048	149.34	137.161	178.664	1778.34	789.394
Med098	2	1	25.9121	70	3	41.763	0.492464	19.4006	16.2544	1.68488	15.8552	0.174055	4.62626	3.78447	7.27039	22.4887	9.51949	10.1484	1.41838	11.8967	98.6952	236.944	352.536	4083.65	998.974
Med099	2	2	24.2858	67	1	43.0614	0.561514	17.5202	14.6354	1.67702	16.0879	0.131069	4.25764	4.46156	7.23763	22.769	9.44619	10.4988	1.41529	11.4953	99.44	206.142	212.636	1879.6	682.422
Med099	2	2	23.9511	67	2	43.913	0.612502	17.8809	15.1214	1.64324	15.5806	0.121294	4.14551	4.21816	7.09568	22.013	9.00326	10.4009	1.41284	11.2412	82.5962	248.06	276.004	2342.79	509.853
Med099	2	2	24.1166	67	3	42.969	0.688596	17.8727	15.0232	1.69744	15.9189	0.12006	4.20487	4.38243	7.21157	22.5507	9.41717	10.4604	1.4166	11.4164	75.0144	69.4356	79.0774	785.114	632.57
Med100	1	1	34.3021	68	1	42.6777	0.418547	19.27	16.2046	1.72119	9.16245	0.083738	1.34598	2.80343	4.92929	28.4713	15.0304	8.26323	3.10739	6.27527	47.7932	72.3916	71.8614	616.956	536.086
Med100	1	1	34.1121	68	2	42.6294	0.435817	20.2761	17.1303	1.69362	8.9389	0.113334	1.52965	2.63556	4.66036	27.7198	14.4866	8.33209	3.10102	6.19001	45.5734	119.627	192.585	1816.44	488.599
Med100	1	1	34.2964	68	3	42.8056	0.397686	20.2935	17.0458	1.86994	8.9215	0.115939	1.43243	2.81901	4.55412	27.5817	13.7505	8.91668	3.0916	5.98655	45.1292	173.129	150.671	868.388	373.44
Med101	1	1	30.4278	67	1	42.9244	0.486359	18.387	15.7492	1.41053	8.83559	0.137197	0.756746	2.58637	5.35528	29.3667	12.4584	11.2177	3.32368	6.11203	67.3614	150.006	320.76	3890	496.384
Med101	1	1	30.4221	67	2	42.4514	0.442114	19.7027	16.895	1.43414	8.78353	0.157664	0.887682	2.40052	5.33767	28.4713	11.522	11.7398	3.24144	6.22535	108.585	242.062	375.926	5536.82	921.239
Med101	1	1	30.9279	68	3	43.2779	0.49653	20.0817	17.2305	1.39499	8.62012	0.106721	0.791817	2.53013	5.19146	27.5237	12.7272	9.05953	3.19297	5.98327	55.3534	221.108	241.134	2561.48	377.692
Med102	1	2	28.7005	67	1	42.9192	0.634977	17.6969	14.8876	1.45903	8.94077	0.197235	1.0501	2.95102	4.74242	29.8081	13.6061	11.4667	3.33395	5.79252	43.0846	130.132	30.659	532.39	317.347
Med102	1	2		68	2
Med102	1	2		68	3
Med103	2	1	21.9671	77	1	42.6947	0.749758	18.7434	15.4544	1.74741	8.55927	0.107457	0.842472	2.39636	5.21298	29.2529	14.4406	9.49739	3.41769	6.05545	84.4472	102.633	348.87	2667.64	993.644
Med103	2	1	22.3796	77	2	43.2456	0.566797	20.0885	16.6223	1.79314	8.39172	0.15866	1.02988	2.18586	5.01732	27.7074	12.4615	10.3524	3.30176	6.0472	83.0884	150.65	242.426	2744.74	827.071
Med103	2	1	22.1859	77	3	41.6603	0.72213	20.9061	17.2667	1.86051	8.62115	0.120643	0.875308	2.30125	5.32395	28.0903	12.4841	10.5272	3.2583	6.19926	127.12	386.666	1533.61	16330.9	1400.68
Med104	1	1	23.197	76	1	44.7013	0.47657	17.4426	14.6753	1.55646	13.3741	0.124771	3.05972	3.39434	6.79524	24.0054	9.04514	12.1172	1.79492	9.85497	20.0692	31.3504	27.4178	190.401	120.279
Med104	1	1	22.8949	77	2	42.5039	0.434229	18.5991	15.478	1.71611	10.9767	0.135814	1.64343	2.9583	6.23913	27.486	10.0388	14.0829	2.50404	7.88257	46.8104	301.324	40.5928	488.938	182.962
Med104	1	1	22.6889	77	3	42.4475	0.474194	19.0503	15.7014	1.70154	11.747	0.187452	2.54673	2.84294	6.16984	26.2811	9.54708	13.2263	2.23727	8.71657	30.6302	94.578	46.1722	486.472	315.036
Med105	2	1	32.6348	70	1	42.7412	0.372102	19.161	15.7884	2.06927	8.27791	0.142081	0.778363	2.07568	5.28178	29.4479	12.2856	11.6303	3.55741	6.06014	46.8598	240.764	203.032	1300.9	339.508
Med105	2	1		70	2
Med105	2	1		70	3
Med106	1	2	27.4272	66	1	43.7495	0.551984	17.6066	14.8036	1.57496	9.43179	0.153621	1.09946	2.98069	5.19801	28.6601	12.7161	10.3076	3.03867	6.29748	74.4274	304.14	103.323	615.156	360.351
Med106	1	2	27.4956	66	2	43.3279	0.577353	17.8198	14.8839	1.67623	9.39889	0.181652	1.08215	3.00579	5.12929	28.876	12.5083	10.6422	3.07228	6.21144	61.6182	253.466	88.0324	689.436	325.733
Med106	1	2	27.564	67	3	43.0856	0.577387	18.1351	15.1268	1.75191	8.96156	0.164776	0.949361	2.9328	4.91463	29.2404	12.8666	10.7141	3.26287	5.86399	62.5616	195.555	145.96	555.628	385.996
Med107	2	2	32.4764	73	1	42.0732	0.597391	19.5466	16.7698	1.53943	8.72374	0.200536	0.993683	2.84624	4.68328	29.0591	11.9656	12.1321	3.33103	5.67696	29.8678	199.99	132.229	1347.38	757.607
Med107	2	2	32.2909	73	2	42.5938	0.505014	19.1245	16.4594	1.436	8.96963	0.146213	1.00631	2.92165	4.89545	28.8071	12.1363	11.6238	3.21163	5.90176	34.3038	45.844	43.1912	388.054	810.937
Med107	2	2	32.3115	74	3	42.2014	0.580289	18.8324	16.2327	1.48933	9.35777	0.149968	0.967584	2.88291	5.35731	29.0281	12.3698	11.8137	3.10203	6.32489	20.8388	32.5548	27.0734	286.362	401.643
Med108	2	1	19.5109	80	1	41.6981	0.359813	18.3077	16.1041	1.2475	7.54218	0.175575	0.596477	2.17614	4.59398	32.0922	12.4474	14.695	4.25503	5.19046	229.388	66.8584	49.8258	521.19	1099.31
Med108	2	1	19.2747	80	2	41.8921	0.255751	18.981	16.567	1.2612	8.57056	0.178132	0.906936	2.14395	5.34154	30.3006	11.9445	13.604	3.53543	6.24848	177.723	94.4744	52.2406	602.87	653.094
Med108	2	1	19.1351	80	3	41.917	0.252438	19.5499	16.9783	1.29756	8.37444	0.182124	0.830038	2.13676	5.22552	29.9062	11.4695	13.9768	3.57113	6.05556	176.065	426.406	207.418	2462.32	736.306
Med109	2	1	27.9695	69	1	43.1754	0.670808	17.4464	14.3486	1.87154	13.3672	0.1281	2.5216	3.78626	6.93129	25.3401	10.7639	11.4242	1.89569	9.45288	132.818	387.502	107.69	1952.98	200.566
Med109	2	1	27.2785	70	2	42.6096	0.449549	18.3556	15.2081	1.78204	11.8137	0.171688	1.79002	3.19944	6.65259	26.7714	11.365	11.9117	2.26613	8.44261	112.179	39.9038	27.0486	231.556	519.941
Med109	2	1	27.1477	70	3	42.5753	0.533379	18.6902	15.377	1.85628	12.0167	0.157522	1.72305	3.1277	7.00844	26.1844	11.5007	11.0627	2.179	8.73149	84.7206	236.9	40.1458	1142.85	498.199
Med110	1	1	28.5052	66	1	42.5799	0.551431	19.4777	16.0646	1.91174	9.69065	0.153721	1.28622	2.78354	5.46718	27.7003	11.4513	11.2003	2.85845	6.7534	66.233	233.034	114.276	1037.68	538.077
Med110	1	1	27.3174	67	2	41.9177	0.476101	19.6158	16.2701	1.74777	10.0662	0.109458	1.27652	2.67641	6.00378	27.9242	12.0552	10.9545	2.77407	7.28031	87.5246	93.1608	53.7756	691.492	625.681
Med110	1	1	27.0621	67	3	43.3006	0.432116	19.9312	16.5778	1.70428	9.1264	0.10961	1.1142	2.38793	5.51466	27.2097	11.2668	11.1431	2.98143	6.62886	69.2476	43.445	31.6088	229.116	571.805
Med112	2	2	25.0329	68	1	43.6933	0.594934	17.6139	14.9865	1.55025	12.0753	0.148801	2.40144	3.22757	6.29746	26.0226	10.7662	11.3257	2.15503	8.6989	66.9358	91.0946	33.0944	393.118	514.499
Med112	2	2	25.4362	69	2	43.6399	0.549573	17.8829	15.2336	1.58943	10.0066	0.15987	1.58586	2.9345	5.32635	27.921	11.2447	12.394	2.79026	6.91221	85.4036	68.8096	30.125	335.46	581.28
Med112	2	2	24.6154	69	3
Med113	2	1	26.6141	69	1	41.9734	0.56168	18.7392	15.6961	1.67689	11.2383	0.164581	1.82928	3.02833	6.21616	27.4873	12.1357	10.7754	2.44585	8.04543	60.557	106.569	144.791	1278.62	379.648
Med113	2	1	26.8697	69	2	41.355	0.747404	18.9859	15.8943	1.53254	11.2379	0.164801	2.05597	2.99364	6.02354	27.6738	11.5798	11.7275	2.46253	8.0795	102.516	115.832	120.096	827.298	585.86
Med113	2	1	27.2825	69	3	42.3671	0.543254	18.4752	15.3714	1.43188	11.9772	0.162721	2.30833	3.18146	6.32471	26.6373	11.3298	11.1021	2.22399	8.63304	95.7318	145.278	243.096	1606.49	604.901
Med115	2	1	21.9992	73	1	42.6947	0.442118	18.6327	15.5419	1.73558	9.22321	0.114451	0.784489	2.28392	6.04035	29.0073	16.0466	8.14474	3.14504	6.82484	303.36	111.13	71.5802	1359.58	2759.47
Med115	2	1	21.2637	73	2	41.3853	0.525431	19.7037	16.3968	1.73113	9.57528	0.148915	1.16189	2.28336	5.98112	28.8103	14.5531	9.85791	3.00882	7.14301	249.416	224.584	188.743	3024.13	1821.52
Med115	2	1	20.619	74	3	40.8786	0.412767	20.6823	17.1735	1.76282	9.77609	0.152527	1.31216	2.3323	5.9791	28.2503	13.7936	10.4949	2.88973	7.29126	235.518	371.336	262.284	5013.29	1608.24
Med116	1	2	25.2795	68	1	42.9938	0.310662	20.7276	16.8856	2.29426	7.75513	0.125594	0.823615	2.44648	4.35944	28.2128	14.5408	8.60007	3.63795	5.18306	52.248	120.132	31.4212	245.66	311.149
Med116	1	2	25.3177	68	2	42.8427	0.273831	21.1128	17.3694	2.18414	7.62614	0.111329	0.825102	2.42381	4.2659	28.1446	14.4424	8.60858	3.69055	5.091	97.9982	50.04	31.405	232.406	656.107
Med116	1	2	24.7093	74	3	43.4039	0.303353	20.9157	16.9086	2.30886	8.30332	0.105403	1.06903	2.59173	4.53716	27.0737	14.1468	7.79042	3.26059	5.60619	88.5812	114.472	33.1222	290.81	536.985
Med117	1	1	27.2034	65	1	43.3751	0.509179	19.1963	16.2709	1.44648	11.4074	0.142984	1.9009	2.80997	6.55358	25.512	10.8403	10.8149	2.23644	8.45448	86.6862	186.849	208.696	2046.53	343.252
Med117	1	1	26.9976	65	2	42.0134	0.337053	20.6843	17.3619	1.56916	11.7551	0.123294	2.24472	2.71895	6.66816	25.2101	10.2532	11.1669	2.14461	8.91289	86.625	136.023	73.5092	678.406	407.368
Med117	1	1	27.1739	65	3	41.7963	0.237941	21.8497	18.4079	1.65931	11.0942	0.135896	1.90117	2.52032	6.53686	25.0218	10.3927	10.7381	2.25538	8.43803	84.0252	1323.52	460.91	5238.26	362.582
Med118	2	2	19.9929	75	1	42.8904	0.815564	18.4639	15.5011	1.60818	8.41812	0.327754	1.20883	2.85799	4.02355	29.412	12.2222	12.2627	3.49389	5.23238	198.863	14.3469	188.522	1432.73	1215.23
Med118	2	2	19.9522	75	2	42.9004	0.779294	18.5643	15.6365	1.55355	8.15296	0.380964	1.2472	2.89293	3.63187	29.503	11.8422	12.7744	3.61868	4.87906	179.928	84.1292	204.244	2527.42	953.563
Med118	2	2	20.3849	76	3	43.0204	0.489543	18.8053	16.0844	1.54659	8.05755	0.320713	1.28892	2.94513	3.50278	29.6272	12.1066	12.6717	3.67696	4.79171	163.405	86.1044	94.7546	1314.72	1144.51
Med119	1	2	28.0836	73	1	43.8394	0.306602	18.7558	16.1603	1.58525	8.41245	0.145121	0.932748	2.76953	4.56505	28.6289	12.3776	10.9721	3.40316	5.4978	58.5156	284.966	156.753	853.63	154.664
Med119	1	2	28.7504	73	2	43.7478	0.301931	19.3991	16.7468	1.62596	8.16468	0.15018	0.914764	2.65669	4.44305	28.3368	12.2675	10.7285	3.47065	5.35781	48.0216	154.995	180.204	1827.51	288.372
Med119	1	2	28.0634	73	3	43.5087	0.335032	18.9803	16.2664	1.67042	8.62579	0.156165	1.01811	2.67043	4.78108	28.5502	12.1824	11.1897	3.30987	5.79919	49.0738	46.3046	51.5578	488.278	309.28
Med120	2	2	24.3062	69	1	42.9052	0.217478	17.364	14.8659	1.37864	8.27838	0.159266	0.938676	2.642	4.53845	31.235	12.5528	13.618	3.77307	5.47712	130.462	193.916	132.144	1032.37	591.729
Med120	2	2	24.6285	69	2	43.1554	0.225698	17.5342	15.0522	1.38153	8.16977	0.168045	0.944839	2.62839	4.42849	30.9149	12.8651	12.7949	3.78405	5.37333	134.304	106.864	115.575	896.022	694.82
Med120	2	2	24.7831	69	3	43.4792	0.304821	17.4924	15.0061	1.31513	8.27084	0.166603	1.07344	2.54671	4.48408	30.4527	12.219	13.2022	3.68194	5.55752	127.47	40.2222	76.7382	536.732	711.923
Med121	2	1	25.734	67	1	44.1563	0.356841	17.4866	14.9577	1.39419	11.2309	0.205486	1.64917	2.87894	6.49733	26.7693	10.2469	11.75	2.38354	8.1465	172.319	124.762	102.187	802.904	1695.56
Med121	2	1	25.6143	67	2	43.197	0.251875	18.908	16.187	1.44266	10.9126	0.228421	1.51696	2.58492	6.58232	26.7306	9.54867	12.5778	2.44951	8.09928	156.55	666.878	193.163	2073.98	786.607
Med121	2	1	25.299	67	3	42.3459	0.227634	19.359	16.5562	1.59274	11.1188	0.224294	1.79092	2.564	6.53956	26.9487	9.9369	12.3282	2.42371	8.33048	113.755	142.871	35.8706	319.564	885.201
Med122	2	2	26.1466	72	1	43.0316	0.23111	18.709	15.3766	2.23587	8.36131	0.161847	0.951456	2.48665	4.76136	29.667	15.3668	9.44814	3.54813	5.71281	110.615	102.715	102.857	386.816	493.917
Med122	2	2	26.3531	72	2	42.8868	0.359411	18.8859	15.6397	2.15924	8.83085	0.162587	1.29942	2.63043	4.73841	29.037	15.3328	8.80731	3.28814	6.03783	113.167	77.341	78.3202	416.068	546.703
Med122	2	2	26.5539	72	3	43.523	0.242788	17.6254	14.3878	2.1177	9.03094	0.127821	1.1104	2.65251	5.14021	29.5779	15.6028	9.05789	3.27517	6.25061	106.67	67.9406	157.69	474.892	443.581
Med123	1	1	24.1746	72	1	42.5065	0.510521	17.0343	14.2683	1.53878	13.3301	0.206681	2.77542	3.31452	7.03352	26.6185	11.0613	11.9882	1.99687	9.80894	63.1398	159.033	75.2342	795.518	455.179
Med123	1	1	24.4926	72	2	42.4824	0.278381	18.4745	15.4808	1.48626	12.2707	0.164319	2.14107	2.9958	6.96956	26.4939	11.38	11.5524	2.15912	9.11062	77.5172	42.2446	41.184	337.168	609.921
Med123	1	1	23.9591	73	3	42.324	0.299336	18.1706	15.1189	1.55028	12.5847	0.172673	2.28109	2.88225	7.24865	26.6214	11.4152	11.5893	2.11538	9.52974	61.6836	49.756	84.1622	764.838	465.143
Med124	2	1	27.3312	74	1	43.0271	0.43653	17.9417	15.0941	1.61681	9.92299	0.218638	1.05889	2.86414	5.78132	28.6716	12.4299	11.0179	2.88941	6.84021	107.885	178.761	94.4792	969.98	770.97
Med124	2	1	28.5934	75	2	42.1559	0.332214	18.6427	15.8897	1.67524	10.597	0.249586	1.27093	2.60123	6.47522	28.2098	11.5066	12.0468	2.66207	7.74614	127.856	187.362	111.221	1127.82	795.484
Med124	2	1	28.0515	75	3	42.7017	0.334013	18.1042	15.2688	1.67328	11.5106	0.173856	1.21054	2.63534	7.49084	27.3495	12.0753	10.928	2.37603	8.70139	79.3644	0	0	857.514	606.794
Med125	1	2	23.9689	69	1	43.7012	0.282065	17.2873	14.8404	1.4166	15.6061	0.145899	4.12908	3.60635	7.72476	23.1234	10.5195	9.78144	1.48169	11.8538	119.854	120.998	155.256	1053.21	813.234
Med125	1	2	23.27	69	2	43.0982	0.275148	17.5766	15.0526	1.50097	15.2659	0.13985	4.04287	3.41958	7.6636	23.7267	10.5357	10.2625	1.55423	11.7065	132.705	1206.32	740.728	8889.57	739.026
Med125	1	2	23.1764	69	3	43.4714	0.349988	18.1801	15.6319	1.48766	15.0024	0.132602	3.68782	3.43785	7.74409	22.9961	10.3361	9.78511	1.53284	11.4319	88.8226	160.333	138.061	1028.75	526.69
Med126	1	2	26.0125	66	1	49.2943	0.459696	20.4171	17.2479	1.60198	5.9297	0.098852	0.635614	1.96137	3.23387	23.8992	10.2782	9.59404	4.03042	3.86948	51.3342	137.758	70.9262	374.028	463.748
Med126	1	2	26.4654	66	2	43.7184	0.458479	17.1961	14.5533	1.42627	7.77501	0.157221	0.854802	2.67369	4.0893	30.852	13.8188	11.5428	3.96809	4.9441	60.9414	61.2828	22.6784	268.24	474.139
Med126	1	2	25.7306	66	3	43.6402	0.40878	17.2126	14.6029	1.41858	8.57447	0.15728	0.987656	2.75766	4.67188	30.164	13.787	11.0679	3.51788	5.65953	86.3398	379.918	124.935	743.672	349.74
Med127	1	2	24.5514	68	1	44.3585	0.383703	17.0859	14.5882	1.41597	14.9418	0.146173	3.91305	4.14125	6.74136	23.23	10.7315	9.44909	1.5547	10.6544	102.576	60.9114	59.1604	378.882	708.285
Med127	1	2	23.9817	68	2	44.4283	0.374436	16.8721	14.4427	1.40395	15.9995	0.123131	4.39988	4.32471	7.15179	22.3256	10.1586	9.54256	1.39539	11.5517	101.791	149.47	79.9654	505.492	562.964
Med127	1	2	24.0196	68	3	45.3219	0.415834	17.7487	15.3717	1.37343	15.6738	0.114477	4.34008	4.17808	7.04114	20.8398	9.33507	9.02448	1.3296	11.3812	87.677	51.1512	50.4336	384.254	586.323
Med129	2	1	28.7184	65	1	44.2673	0.251165	17.3004	14.6403	1.74104	8.50549	0.162704	1.13375	2.82077	4.38827	29.6756	11.9632	12.0871	3.48899	5.52202	52.6734	64.822	36.9716	236.734	198.811
Med129	2	1	27.3069	66	2	43.1227	0.425566	18.9299	15.9935	1.89065	7.97221	0.167925	0.919715	2.57277	4.3118	29.5496	12.9229	10.8433	3.70658	5.23152	120.774	480.652	270.694	2429.84	214.138
Med129	2	1		66	3
Med130	2	1	27.2903	70	1	43.9418	0.377096	17.8039	14.8533	1.55246	12.5013	0.14116	1.9954	3.43477	6.93	25.3759	11.0084	10.0597	2.02985	8.9254	42.3062	25.0006	36.3378	281.656	401.384
Med130	2	1	27.7746	70	2	43.1047	0.329672	18.5893	15.5361	1.50334	12.8154	0.175526	2.20598	3.3657	7.06816	25.161	10.1647	11.0058	1.96335	9.27414	94.7874	67.5522	61.38	812.532	839.141
Med130	2	1	28.7576	71	3	42.7377	0.342157	18.4752	15.3608	1.43196	12.7224	0.199189	2.16864	3.39589	6.95864	25.6677	9.76399	11.7323	2.01753	9.12727	61.5546	41.6104	105.508	492.58	646.501
Med131	1	2	26.746	75	1	43.2899	0.379373	18.1109	15.3622	1.53584	10.4534	0.188903	1.48693	3.17194	5.60562	27.7665	12.151	10.843	2.65622	7.09255	66.9878	89.8786	32.3302	316.04	501.53
Med131	1	2	25.4462	76	2																83.7784	199.215	37.2948	431.626	474.098
Med131	1	2	27.2285	76	3	43.5975	0.399505	18.0961	15.4936	1.51348	11.0633	0.187636	1.91206	3.28081	5.68276	26.8437	11.3321	11.056	2.42638	7.59481	57.679	123.472	52.5224	462.892	378.482
Med132	1	2	23.953	79	1	43.4864	0.598275	16.2455	13.8896	1.24627	7.57665	0.071154	0.531333	2.69344	4.28073	32.0932	14.1854	11.6896	4.2358	4.81206	55.8264	26.9126	103.027	220.574	267.756
Med132	1	2	23.9951	79	2	43.2874	0.527308	17.1221	14.6684	1.42264	7.31312	0.086781	0.457212	2.45181	4.31731	31.7501	14.2592	11.1989	4.34153	4.77453	67.0392	81.6658	31.6516	695.02	321.709
Med132	1	2	24.1702	80	3	43.4273	0.463853	17.9969	15.0236	1.45721	7.75007	0.103631	0.647156	2.43206	4.56722	30.3619	13.7741	10.715	3.91763	5.21438	62.597	58.316	34.3282	513	297.439
Med134	2	2	29.4221	65	1	43.321	0.390236	18.4386	15.1994	1.63272	11.4454	0.179151	1.40817	3.01063	6.84743	26.4047	10.8134	11.3117	2.30702	8.2556	77.9874	38.1308	130.722	779.586	391.476
Med134	2	2	29.4221	65	2
Med134	2	2	29.9638	65	3	43.2078	0.397732	18.5894	15.4283	1.58835	10.6211	0.228887	1.21704	2.78501	6.3902	27.1839	10.8563	11.8863	2.55941	7.60724	67.1676	399.816	368.038	3753.97	413.945
Med135	2	2	27.9792	76	1	44.4611	0.455886	17.8757	14.6716	1.91604	10.205	0.173218	1.47503	3.10886	5.44785	27.0023	12.9241	9.35271	2.646	6.92288	35.6688	46.2892	22.4786	676.982	421.853
Med135	2	2	28.3828	76	2	44.3992	0.515749	17.6027	14.6404	1.73207	9.70837	0.182446	1.38599	3.07293	5.06702	27.774	13.2641	10.0189	2.86083	6.453	41.699	131.715	51.9264	787.772	274.18
Med135	2	2	27.2955	76	3	43.9836	0.525408	17.9844	14.913	1.79475	10.185	0.133655	1.46594	3.09225	5.49317	27.3216	13.3372	9.45094	2.68253	6.95912	23.9938	73.2056	66.3944	1264.9	231.057
Med136	1	1	28.37	79	1	43.6367	0.385228	18.273	15.6536	1.41642	10.3794	0.184468	1.50745	3.36681	5.32069	27.3257	12.0608	10.2862	2.63268	6.82814	72.0296	341.29	129.826	1547.2	723.898
Med136	1	1	28.2504	80	2	42.6063	0.36084	18.6682	16.0347	1.33741	10.4571	0.179334	1.43368	3.16932	5.67474	27.9076	11.9818	11.0096	2.66878	7.10841	56.0554	61.0178	23.4656	556.182	840.359
Med136	1	1	27.784	80	3	42.0174	0.542508	19.8361	16.7283	1.47769	10.498	0.158168	1.37784	2.85899	6.10304	27.106	11.7641	10.7461	2.58201	7.48088	43.0364	147.689	71.734	711.506	662.261
Med137	2	2	26.7214	70	1	43.2103	0.323302	18.0574	15.1565	1.5717	8.93068	0.161196	1.06885	2.84377	4.85687	29.4783	12.8851	11.0649	3.30079	5.92571	51.5274	215.27	193.351	1059.56	334.794
Med137	2	2	27.0974	70	2	44.0701	0.376102	17.0999	14.2655	1.43081	9.90106	0.165293	1.45353	3.15826	5.12398	28.5528	11.7092	11.7415	2.88382	6.57751	71.1996	37.6936	59.714	443.554	715.43
Med137	2	2	25.6985	70	3	43.5055	0.638943	16.9377	14.0396	1.45403	11.4337	0.186289	2.13305	3.4053	5.7091	27.4841	12.2499	10.0978	2.40377	7.84215	53.4142	75.0046	117.229	565.538	694.668
Med138	1	2	29.019	67	1	44.7688	0.330536	19.133	15.8603	1.81041	13.4195	0.177978	3.46632	3.07943	6.69577	22.3482	9.95973	8.93602	1.66535	10.1621	29.4899	54.0496	25.9164	413.078	508.541
Med138	1	2	28.4945	67	2	44.5986	0.387792	18.4941	15.5292	1.51992	14.337	0.095524	3.60617	3.48438	7.1509	22.1825	10.5586	8.30546	1.54723	10.7571	22.7592	147.674	45.7138	947.986	254.18
Med138	1	2	28.3474	67	3	45.1548	0.401564	17.7673	15.021	1.36279	14.6169	0.130094	3.92718	3.64292	6.91674	22.0594	10.4733	8.421	1.50917	10.8439	42.6954	225.522	83.8974	1825.44	291.884
Med139	2	2	27.8054	65	1	44.13	0.429383	18.4592	15.1213	1.73755	12.7208	0.116683	2.98449	3.34688	6.2727	24.2607	11.6013	9.07931	1.90718	9.25719	63.0948	518.66	175.598	5701.85	245.828
Med139	2	2	27.9457	65	2	43.9658	0.512214	18.7402	15.2599	1.94779	12.9332	0.129075	3.18616	3.24807	6.36986	23.8486	11.5941	8.82841	1.84398	9.55603	56.227	102.568	69.6482	705.55	282.608
Med139	2	2	27.8105	65	3	43.7426	0.552688	18.3613	15.0316	1.71646	13.0871	0.121047	3.01947	3.41077	6.53583	24.2563	11.899	8.91395	1.85345	9.5553	62.3024	30.5692	66.569	484.294	434.171
Med140	2	2	28.9127	75	1	44.6469	0.466453	19.4467	16.1493	1.66777	8.95348	0.164491	1.00154	2.44493	5.34251	26.4865	11.2195	11.1331	2.95823	6.34405	73.2664	195.355	174.776	1160.38	564.976
Med140	2	2	28.8072	75	2	42.5465	0.542419	20.8405	17.1535	1.99628	8.49226	0.318746	0.949258	2.36987	4.85438	27.5272	11.0217	11.8699	3.24145	5.80364	54.8042	78.1186	156.717	1088.26	649.833
Med140	2	2		75	3
Med141	1	1	28.0993	74	1	44.143	0.266845	17.759	14.3816	1.53226	13.064	0.145125	2.61953	3.32038	6.979	24.7671	10.6415	10.6029	1.89582	9.59854	169.116	66.4096	87.1768	1075.12	1141.4
Med141	1	1	28.0644	75	2	43.6268	0.121117	19.1873	15.7781	1.50825	13.1	0.162777	2.44335	3.26555	7.22836	23.9647	9.99882	10.2883	1.82936	9.67171	146.217	159.882	130.132	1440.45	848.857
Med141	1	1	27.7429	75	3	43.1968	0.335453	19.9525	16.4852	1.48393	13.2997	0.117815	2.69034	3.26802	7.22351	23.1498	9.86244	9.84578	1.74063	9.91385	281.936	232.846	168.486	3643.79	1766.7
Med142	2	1	23.0118	69	1	43.6586	0.381071	18.1332	14.6756	1.93921	11.2147	0.150473	1.79692	2.78416	6.48315	26.6124	12.7184	9.5421	2.373	8.28007	214.17	430.806	699.424	6988.66	1151.95
Med142	2	1	23.1445	69	2	43.473	0.245879	18.9917	15.3241	1.90385	11.741	0.152979	1.81304	2.79018	6.98478	25.5485	12.1431	9.07967	2.17601	8.79781	171.153	114.994	190.329	1447.9	964.181
Med142	2	1	23.0767	70	3	42.8243	0.233344	19.8173	15.7813	2.11038	12.1106	0.140181	2.04331	2.81605	7.11102	25.0145	12.0735	8.7925	2.06551	9.15433	233.282	360.916	477.812	3816.62	1504.27
Med143	2	2	20.7899	79	1	43.4094	0.51036	18.1673	15.3259	1.50965	10.4194	0.237973	1.16738	2.7471	6.26692	27.4936	11.728	10.9848	2.6387	7.4343	69.147	33.794	29.7098	414.712	685.962
Med143	2	2	20.99	79	2	43.3927	0.641765	18.0907	15.2086	1.42959	11.437	0.215631	1.86663	2.87418	6.48059	26.4377	11.5533	10.1165	2.31159	8.34722	61.9382	131.513	113.813	1812.62	596.208
Med143	2	2	20.9637	79	3	43.7751	0.438489	18.3024	15.1229	1.51464	13.0235	0.261794	2.51739	3.22986	7.01444	24.4605	10.9198	9.32237	1.87819	9.53183	69.581	116.444	114.776	2098.49	525.079
Med145	2	2	27.3633	71	1	45.6289	0.334906	18.7943	14.7291	2.4921	8.2465	0.185307	1.33759	2.93654	3.78706	26.9953	12.7257	8.82001	3.27355	5.12465	80.0746	97.302	112.662	749.098	394.53
Med145	2	2	27.4286	71	2	44.6363	0.401081	17.8656	14.3039	2.04988	8.66512	0.142298	1.29238	3.03151	4.19894	28.4319	13.4757	9.17138	3.28118	5.49132	91.831	90.2804	64.0728	476.864	673.757
Med145	2	2	26.5044	71	3	44.1287	0.34449	18.3765	14.7618	2.04614	8.88338	0.165109	1.1642	2.96154	4.59254	28.2118	13.4147	8.99881	3.1758	5.75673	97.219	28.929	18.8366	198.809	568.57
Med146	1	1	25.2635	81	1	44.4426	0.312847	19.3195	16.2879	1.59023	11.6297	0.131793	1.88001	3.42919	6.18871	24.2953	11.7783	7.67216	2.08907	8.06872	63.0762	68.02	51.5456	502.716	358.865
Med146	1	1	25.6016	81	2	43.7363	0.337801	19.4525	16.6128	1.44097	11.5893	0.151524	1.79405	3.28481	6.35896	24.884	11.0486	9.28335	2.14714	8.15301	92.8724	318.882	197.956	1783.49	244.716
Med146	1	1	25.5021	81	3	44.179	0.380401	19.2164	16.3978	1.42926	11.9424	0.147389	1.86457	3.48847	6.442	24.2818	11.1134	8.53169	2.03324	8.30657	63.114	161.346	124.631	1116.26	292.579
Med147	1	2	27.5134	74	1	44.3406	0.528176	19.9446	16.8908	1.62122	13.4435	0.088091	3.32041	4.13208	5.90288	21.7432	10.9497	7.03609	1.61738	9.22329	61.9228	150.511	43.5376	324.94	597.834
Med147	1	2	27.4124	74	2	43.9821	0.39118	20.2858	17.11	1.629	12.9258	0.099662	2.75178	4.05229	6.02207	22.4151	10.5427	7.99388	1.73414	8.77385	46.6436	40.391	28.7546	192.69	537.431
Med147	1	2	27.1369	74	3	43.5336	0.34319	19.8732	16.5319	1.72754	14.2276	0.100722	3.39003	4.16985	6.567	22.0225	11.1184	7.23364	1.54787	9.95702	62.599	102.372	22.1224	342.148	513.405
Med148	2	1	25.5751	67	1	43.3289	0.384484	18.3108	15.2541	1.42897	11.0016	0.13252	2.35188	3.12021	5.39697	26.9742	12.6877	10.4932	2.45185	7.74885	68.364	110.29	69.945	665.538	491.114
Med148	2	1	24.8255	67	2	42.6816	0.39285	18.2004	14.6962	1.48665	11.6504	0.123198	2.47269	3.11626	5.93828	27.0748	12.9894	10.4126	2.32393	8.41097	106.594	148.769	100.295	766.174	636.899
Med148	2	1	24.8886	67	3	42.7275	0.352577	19.2683	15.9228	1.38639	11.517	0.121712	2.73781	2.86984	5.7876	26.1346	11.7678	11.0004	2.26923	8.52541	70.8258	154.283	125.368	1015.46	146.275
Med149	1	1	27.0776	75	1	44.0903	0.38868	19.0377	15.7798	1.54926	8.6714	0.117466	1.05686	2.64213	4.85494	27.812	12.16	11.344	3.20732	5.91181	76.6772	61.2306	40.1428	375.076	272.65
Med149	1	1	26.3875	75	2	43.2943	0.355656	19.0499	15.6905	1.58656	8.8766	0.162004	1.14597	2.50221	5.0664	28.4235	11.9422	12.29	3.20207	6.21238	75.2862	62.7724	77.5788	436.144	331.304
Med149	1	1	26.6444	75	3	43.6286	0.387326	19.6914	16.379	1.55897	9.22116	0.142603	1.27397	2.59135	5.21324	27.0715	11.7323	11.247	2.9358	6.4872	68.8636	294.394	119.104	1044.21	222.541
Med150	2	1	29.993	71	1	44.6593	0.38158	17.7561	14.5825	1.56428	11.7077	0.150408	2.32095	3.26636	5.97001	25.4953	12.4813	8.71352	2.17765	8.29096	46.9258	93.7898	116.948	550.194	343.867
Med150	2	1	28.434	71	2	42.5683	0.384945	18.6804	14.9726	1.81289	11.8695	0.12089	2.29036	3.17708	6.28118	26.4969	14.1825	8.04193	2.23235	8.57154	81.9048	216.408	129.411	1297.27	328.583
Med150	2	1	27.8675	71	3																78.271	574.704	231.66	4739.27	290.45
Med152	2	1	35.974	72	1	44.8734	0.431876	17.8607	14.3472	1.81069	9.83867	0.181144	0.937948	3.35385	5.36573	26.9953	13.805	8.6572	2.7438	6.30368	29.3812	227.324	48.502	601.842	148.924
Med152	2	1		72	2
Med152	2	1		72	3
Med154	1	2		69	1	43.4151	0.55444	19.0143	15.9119	1.43371	11.2816	0.169771	2.21028	2.59157	6.31003	25.7345	11.0272	11.2573	2.28109	8.52031	99.7962	78.0474	28.9528	24.8956	689.901
Med154	1	2	32.0959	69	2	43.7932	0.524945	19.0396	15.9956	1.30283	11.0664	0.13343	2.00577	2.63559	6.29165	25.5758	11.2387	10.6878	2.31111	8.29742	73.2752	165.141	82.5868	842.866	402.388
Med154	1	2	32.1004	70	3	51.7416	0.445246	23.5891	19.7443	1.58648	6.76622	0.09315	1.42587	1.49992	3.74728	17.5579	6.46817	8.76909	2.59493	5.17315	84.5624	127.047	39.215	1008.22	499.389
Med155	2	1	26.3277	77	1	42.4591	0.279622	19.4673	16.4262	1.50223	11.4118	0.195886	2.54603	3.30035	5.3695	26.3823	10.4571	11.5524	2.31185	7.91553	87.9444	204.266	127.676	1440.26	341.05
Med155	2	1	26.6373	77	2	41.8699	0.241505	20.174	17.1343	1.42102	12.8591	0.164976	3.17446	3.52238	5.99733	24.7941	8.68053	12.5605	1.92813	9.17179	157.196	548.766	285.376	4383.37	813.214
Med155	2	1	26.282	78	3	42.6935	0.245373	19.9218	16.945	1.36076	12.5603	0.125065	2.7056	3.62656	6.10312	24.579	9.17814	11.5858	1.95687	8.80871	148.188	1222.22	898.008	7423.6	503.065
Med156	2	2	25.9676	67	1	44.4319	0.463047	18.1998	15.0345	1.66238	8.66308	0.139978	1.25319	2.73561	4.5343	28.2422	13.2028	10.1702	3.26006	5.78749	136.832	158.898	55.8956	535.072	794.302
Med156	2	2	25.3316	67	2	43.1381	0.407657	18.2109	14.8633	1.75022	9.63312	0.126372	1.48398	2.95833	5.06443	28.6103	14.3502	9.24498	2.96999	6.54841	145.967	50.6274	61.8328	536.82	752.687
Med156	2	2	23.96	67	3	43.1929	0.42958	17.9241	14.7256	1.63332	9.66248	0.123088	1.42447	2.89738	5.21755	28.7909	13.9794	10.0811	2.97966	6.64202	139.569	63.234	72.849	579.536	841.81
Med157	1	1	24.6103	65	1	43.8199	0.299325	18.8719	15.8356	1.51592	8.24031	0.172785	0.911792	2.79194	4.36379	28.7686	13.5605	9.96734	3.4912	5.27558	80.7712	210.452	43.567	1481.34	365.38
Med157	1	1	23.8548	66	2	42.3192	0.33772	18.831	15.7523	1.56987	9.30641	0.181585	1.14354	2.47048	5.5108	29.104	12.7747	11.7757	3.1273	6.65434	101.3	1481.56	174.422	5236.49	243.13
Med157	1	1	23.4201	66	3	43.2652	0.436132	19.612	16.4077	1.54497	8.98932	0.162395	0.974453	2.44456	5.4079	27.6974	12.9993	10.1206	3.08115	6.38236	75.43	89.9542	34.8024	632.164	419.296
Med159	1	2	23.1216	67	1	44.5281	0.715519	18.1044	14.9545	1.58029	8.05073	0.133831	0.705679	2.7377	4.47352	28.6013	12.7254	10.8292	3.55263	5.1792	123.487	180.255	105.478	1378.91	1010.23
Med159	1	2	23.0796	67	2	44.1018	0.723417	18.2347	15.1036	1.55516	8.19901	0.163154	0.717706	2.83816	4.47999	28.7411	12.9424	10.6866	3.50543	5.1977	162.769	155.551	109.467	2488.6	919.896
Med159	1	2	23.2107	67	3	44.4378	0.681315	18.2739	15.0923	1.64483	8.17514	0.183755	0.824617	2.68559	4.48118	28.4318	12.3846	11.0564	3.47784	5.30579	93.8956	102.936	182.359	1366.56	794.223
Med160	2	2	34.9268	64	1															0	113.178	1110.53	435.222	5468.56	625.569
Med160	2	2	35.0552	65	2																69.6552	673.79	312.35	2724.19	522.177
Med160	2	2	35.4418	65	3																54.5688	377.89	291.254	2049.95	538.066
Med162	1	2	27.125	65	1	44.9193	0.542293	17.6086	14.7321	1.32426	14.887	0.119089	3.08031	3.93901	7.74855	22.0428	10.9605	7.18513	1.48068	10.8289	38.051	41.777	56.7798	403.128	345.864
Med162	1	2	28.2256	65	2	48.2177	0.459659	20.1908	16.888	1.32627	11.9285	0.122701	2.24731	3.16056	6.39791	19.3261	9.0017	7.06046	1.62016	8.64522	31.7336	47.2802	39.1716	332.462	229.112
Med162	1	2	28.2117	65	3	44.0434	0.440625	18.4177	15.0847	1.41852	13.5421	0.105026	2.43592	3.61101	7.39015	23.5562	11.1614	8.37908	1.73947	9.82607	422.676	45.1824	171.211	633.874	372.228
Med163	1	2		70	1	44.0561	0.533816	20.0878	16.322	1.90024	10.3427	0.112819	1.26706	2.89991	6.06288	24.9795	11.7879	8.26995	2.41519	7.32994	54.311	254.596	154.992	1387.95	239.274
Med163	1	2		71	2
Med163	1	2		71	3
Med164	2	2		70	1	43.4237	0.483983	18.1642	14.8091	1.57898	11.0786	0.161765	1.54801	2.77457	6.59424	26.8496	12.0669	10.4405	2.42356	8.14225	31.708	133.327	127.659	1620.14	425.847
Med164	2	2		70	2
Med164	2	2		70	3
Med166	1	2	33.0889	66	1	43.4701	0.443827	17.7632	14.6818	1.36138	9.19586	0.134308	0.93374	2.51144	5.61637	29.127	13.5507	9.65398	3.1674	6.55011	98.4656	65.74	40.2132	419.08	1403.33
Med166	1	2	32.8956	66	2	43.6888	0.55054	18.281	15.1521	1.38005	8.47641	0.122701	0.850022	2.36153	5.14215	29.0033	13.2664	9.93086	3.42165	5.99218	101.527	111.643	96.7368	590.59	1086.95
Med166	1	2	32.7873	66	3	44.427	0.492985	18.3367	14.9889	1.28025	8.37371	0.135161	0.778979	2.3828	5.07678	28.3695	12.8696	9.49499	3.38793	5.85576	68.0652	113.3	91.8802	453.82	708.863
Med167	2	2	24.2916	74	1	43.2075	0.482454	17.9272	14.5115	1.26704	7.66817	0.1657	0.677553	2.24506	4.57986	30.7147	13.4986	12.3065	4.00547	5.25741	68.9306	89.4612	85.7664	538.454	417.753
Med167	2	2	24.9733	74	2	43.7391	0.588444	17.9677	14.9189	1.29807	7.49801	0.180328	0.787321	2.15395	4.37641	30.2068	13.2265	12.0326	4.02864	5.16373	67.4322	177.113	80.998	757.226	397.335
Med167	2	2	24.2916	74	3	44.0129	0.625613	18.1522	15.1286	1.25624	7.98226	0.157799	0.827373	2.11902	4.87808	29.2271	12.5118	12.0718	3.6615	5.70545	87.0618	71.8848	44.8454	285.064	661.352
Med168	1	1	27.2311	72	1	45.0115	0.375014	18.9019	15.1553	1.81318	10.9435	0.182455	2.08315	2.66535	6.01253	24.7681	11.0332	10.1466	2.26327	8.09568	140.274	208.806	77.126	1011.35	406.731
Med168	1	1	26.9508	73	2	43.9861	0.286797	19.8325	15.9523	1.77121	10.8109	0.136944	1.93651	2.70074	6.03668	25.0262	11.441	9.85392	2.31491	7.97319	117.634	1256.56	63.0978	848.076	412.243
Med168	1	1	27.1262	73	3	44.0492	0.328509	20.4145	16.1196	1.73016	11.7522	0.144862	2.63056	2.61859	6.35823	23.4555	10.5805	9.49229	1.99583	8.98879	141.444	146.374	49.7736	668.482	538.02
Med169	2	1	27.0337	71	1	44.6046	0.430467	18.7344	15.5742	1.60608	9.5716	0.133715	1.2128	2.49894	5.72615	26.5746	14.7202	7.20505	2.7764	6.93894	37.565	105.853	56.894	1228.95	338.451
Med169	2	1	26.7022	71	2	43.1715	0.496961	18.5289	15.17	1.60045	10.1604	0.138181	1.32263	2.47147	6.22814	27.5755	14.81	7.92119	2.71401	7.55077	44.3006	47.8416	31.9446	578.6	396.423
Med169	2	1	26.835	71	3	43.4552	0.483805	18.4481	15.1648	1.52315	10.06	0.139317	1.28248	2.4472	6.19096	27.4954	14.678	8.01133	2.73316	7.47343	46.2132	368.83	284.978	5105.69	410.534
Med170	2	2	28.439	71	1	45.004	0.685646	16.6304	13.5368	1.40566	13.5137	0.151144	2.60075	3.82624	6.93555	24.095	12.8409	8.2696	1.78301	9.5363	26.4684	46.1376	26.015	244.02	227.71
Med170	2	2	29.0619	72	2	43.9917	0.654837	17.5535	14.3872	1.5421	13.7556	0.152563	3.01177	3.91048	6.68076	24.0444	12.2749	8.95036	1.74797	9.69253	24.8916	25.955	29.3504	276.822	197.367
Med170	2	2	29.3888	72	3	45.5427	0.734054	18.1048	14.7628	1.59215	13.5744	0.14969	3.23457	3.75829	6.43183	21.9701	11.0473	8.39024	1.6185	9.6664	28.6966	153.174	81.958	1447.84	155.562
Med171	1	2	24.4226	79	1	43.9262	0.584057	16.3673	13.5176	1.22961	11.4164	0.15525	2.08281	3.4547	5.72361	27.617	10.7188	13.6002	2.41907	7.80643	31.7284	28.4252	9.69568	165.72	184.327
Med171	1	2	24.5943	80	2	44.5395	0.545484	16.069	13.153	1.20288	11.3316	0.160759	1.99272	3.3851	5.79299	27.5144	10.8082	13.3168	2.42812	7.78571	39.0998	39.1278	7.65036	134.472	233.333
Med171	1	2	24.5861	80	3	43.7275	0.573881	16.0043	13.1521	1.2442	11.8437	0.146702	2.21013	3.37782	6.10904	27.8507	10.7687	13.7908	2.35152	8.31917	23.5796	72.4804	14.6403	217.07	136.135
Med172	2	1	25.2846	67	1	44.557	0.583623	17.6762	14.3092	1.80568	13.0559	0.210797	3.0278	3.40539	6.41193	24.0692	10.7531	10.3342	1.84355	9.43973	49.87	44.5926	37.6674	500.206	419.336
Med172	2	1	25.071	67	2	44.3134	0.5652	17.7213	14.2387	1.7178	14.1372	0.138953	3.39141	3.54853	7.0583	23.2629	10.5131	9.86179	1.64551	10.4497	49.1886	50.8522	45.548	344.616	433.745
Med172	2	1	25.3323	67	3	44.0151	0.577218	17.4037	14.1292	1.73629	13.6633	0.138612	3.23861	3.36419	6.92192	24.3407	10.7433	10.5708	1.78146	10.1605	52.4178	54.5422	38.4624	400.366	426.596

## Sheet: 6. Urinary metabolites
TABLE S1.6 MEDLEY RAW DATA,URINARY METABOLITES
Study ID	Gender (1=Male, 2=Female)	Diet allocation (1=Med, 2=Hab)	Age (y)	BMI (kg/m2)	Visit	Sodium (mmol/24hr) Norm: 40 - 100	Potassium (mmol/24hr) Norm: 50 - 140	Calcium (mmol/24hr) Norm: 2.5 - 7.5)	Magnesium (mmol/24hr) Norm: 2.5 - 5.0
Med001	2	2	68	23.6055	1	120	67	3.9	3.9
Med001	2	2	68	23.3464	2
Med001	2	2	68	23.7683	3	128	92	2.2	4.1
Med002	2	1	66	21.8688	1	75	79	4.4	5.6
Med002	2	1	66	21.4341	2
Med002	2	1	67	21.3599	3	79	81	3.9	5.2
Med003	2	2	72	33.3428	1	110	73	7.3	5
Med003	2	2	72	33.0344	2	88	81	4.8	3.5
Med003	2	2	72	33.2353	3	118	77	7.3	5.4
Med004	2	1	78	33.2577	1	93	73	3.8	3.7
Med004	2	1	78	33.1859	2	111	89	5.6	5.4
Med004	2	1	79	33.4657	3	90	68	3.4	4
Med005	1	1	80	26.5096	1	115	77	3	3.8
Med005	1	1	80	25.6952	2	92	92	2	3.2
Med005	1	1	81	25.7131	3	104	71	2.8	5.8
Med006	2	1	82	22.8865	1	130	89	4.1	4.8
Med006	2	1	82	22.895	2	125	83	4	5.2
Med006	2	1	83	23.0452	3	94	63	3.2	3.3
Med007	1	2	81	24.7133	1	74	82	5.6	5.4
Med007	1	2	81	24.261	2	79	66	4.6	5
Med007	1	2	81	24.2846	3	86	69	4.3	5
Med008	1	1	75	25.48	1	206	122	4.7	4.1
Med008	1	1	75	25.2965	2	158	123	6.4	4.5
Med008	1	1	75	25.163	3	145	97	4.8	5.1
Med009	2	1	72	25.2923	1	107	81	3.6	2.8
Med009	2	1	72	24.8877	2	109	98	3.3	3.9
Med009	2	1	73	24.396	3	108	102	5.6	4.3
Med010	1	2	82	34.0432	1	224	79	6.6	4.2
Med010	1	2	82	34.2685	2	255	126	6.2	4.2
Med010	1	2	83	34.053	3	195	92	4.6	3.5
Med011	2	2	76	24.996	1	192	54	6	3.5
Med011	2	2	76	24.4752	2	168	67	4.5	3.9
Med011	2	2	76	24.3304	3	183	51	3.2	3
Med012	2	1	71	25.695	1	120	69	5.4	2
Med012	2	1	71	25.7747	2	115	53	3.3	4.5
Med012	2	1	71	25.5732	3	121	74	5.6	2.4
Med013	2	1	68	27.8883	1	80	98	7.7	5.4
Med013	2	1	68	26.7	2	66	74	7.3	3.1
Med013	2	1	68	26.143	3	149	45	10.6	2.7
Med014	1	2	76	20.4246	1	81	94	2.8	6.5
Med014	1	2	77	20.4621	2	104	83	2.3	4.1
Med014	1	2	77	19.8163	3	77	83	3.1	4.9
Med015	2	1	68	26.6966	1	46	40	3.8	1.9
Med015	2	1	68	25.91	2	47	39	3.4	1.6
Med015	2	1	68	26.1108	3	53	48	4.5	2.5
Med016	1	2	74	25.1843	1	139	104	5.5	4.9
Med016	1	2	75	25.0284	2	114	91	3.8	3.4
Med016	1	2	75	25.2305	3	64	32	3.9	3.9
Med017	1	1	76	30.033	1	132	61	3.6	5.1
Med017	1	1	76	30.033	2	134	77	3.8	5.9
Med017	1	1	77	30.0759	3	212	66	5	7.5
Med018	2	2	66	20.2989	1	59	66	1	2.9
Med018	2	2	66	20.0196	2	46	53	1.4	3.2
Med018	2	2	67	19.4243	3	58	72	1.4	3.8
Med019	1	1	74	30.013	1	136	108	5.5	4.7
Med019	1	1	74	30.451	2	203	130	9	7.8
Med019	1	1	74	31.1609	3	125	74	5.7	5.3
Med020	2	2	65	28.9673	1	67	78	8.3	3.7
Med020	2	2	65	29.1884	2	135	92	9.9	4
Med020	2	2	65	28.9831	3	171	89	9.1	3
Med021	1	1	65	22.051	1	83	70	2.3	3.6
Med021	1	1	65	22.0763	2	78	99	3	4.4
Med021	1	1	65	22.2476	3	143	98	3.7	5.8
Med022	1	1	71	28.8683	1	152	124	6	5.1
Med022	1	1	71	28.0863	2
Med022	1	1	71	28.031	3	52	46	3.5	2.6
Med023	1	2	69	22.2771	1	143	104	7.1	3.7
Med023	1	2	69	22.348	2	127	134	5.5	3.9
Med023	1	2	69	22.419	3	102	109	4.7	3.5
Med024	2	2	76	34.9632	1	178	61	3.8	5.6
Med024	2	2	76		2
Med024	2	2	76		3
Med025	1	2	68	34.3212	1	226	145	9.1	5.3
Med025	1	2	68	33.8276	2
Med025	1	2	69	33.8722	3	137	64	4.1	2.3
Med027	1	2	67	19.3092	1	85	59	1.3	2.5
Med027	1	2	67	18.5219	2	99	86	2.6	4.1
Med027	1	2	67	19.1703	3	130	69	3.1	3.6
Med028	1	1	71	27.2508	1	165	76	1.5	3.1
Med028	1	1	72	27.1811	2	68	93	2.5	4.3
Med028	1	1	72	27.2613	3	83	69	2.3	3.6
Med029	2	1	67	17.9716	1	94	71	2.6	2.8
Med029	2	1	67	17.9716	2	62	83	3.5	4.8
Med029	2	1	67	18.2063	3	95	61	1.4	3.4
Med030	2	2	76	24.9922	1	176	110	4.1	6.8
Med030	2	2	77	25.3191	2	163	101	4.9	6.7
Med030	2	2	77	25.2595	3	126	152	3.2	6.2
Med031	2	1	65	32.7613	1	127	75	3.9	7
Med031	2	1	65	32.4823	2	114	79	2.9	6.7
Med031	2	1	65	32.841	3	133	87	2.7	6
Med032	2	1	74	21.456	1	84	56	1.8	2.8
Med032	2	1	74		2
Med032	2	1	74		3
Med033	1	2	65	25.493	1	158	125	5.3	5.8
Med033	1	2	66	25.3347	2	93	69	3.7	3.5
Med033	1	2	66	25.5506	3	100	68	2	3.4
Med034	2	1	69	24.9499	1	107	61	3.4	2.3
Med034	2	1	69	25.6539	2	84	84	4	4.7
Med034	2	1	69	25.4302	3	46	54	3.3	3.3
Med035	1	1	68	29.0673	1	145	88	4.2	5
Med035	1	1	68	28.7353	2	152	100	5	5.9
Med035	1	1	68	28.5696	3	143	105	4.5	4.6
Med036	1	2	70	27.9786	1	232	86	6.1	5
Med036	1	2	70	27.7556	2	169	75	3.9	3.9
Med036	1	2	70	27.4267	3
Med037	2	2	66	24.6652	1	81	54	6.8	2.7
Med037	2	2	66	24.0215	2	73	65	6.3	2.9
Med037	2	2	67	24.1009	3	101	73	8.7	4.9
Med038	2	1	65	24.4514	1	61	44	2.1	3.8
Med038	2	1	65	24.4514	2	66	42	1.4	3.8
Med038	2	1	65	24.5212	3	96	63	1.6	3.7
Med039	1	1	66	26.7803	1	47	66	3.1	4.2
Med039	1	1	66	26.1983	2	180	95	7.1	5
Med039	1	1	66	26.532	3	139	67	6.7	3.9
Med040	1	1	76	25.0173	1	80	87	1.5	5
Med040	1	1	76	24.2336	2	96	98	2.4	6.2
Med040	1	1	76	24.4839	3	109	101	2.3	6.4
Med043	1	1	69	29.8404	1	85	93	2.3	7.9
Med043	1	1	69	29.694	2	91	84	4.3	6.7
Med043	1	1	69	29.7552	3	153	100	5.8	9.3
Med044	2	1	67	29.8624	1
Med044	2	1	67	29.0551	2	59	70	1.3	4.2
Med044	2	1	68	29.4597	3	94	79	0.9	3.8
Med045	1	1	68	24.6182	1	59	71	3	3.6
Med045	1	1	68	24.5469	2	163	96	6.5
Med045	1	1	68		3
Med046	1	1	67	28.6108	1	104	96	1.8	5.4
Med046	1	1	67	28.1867	2	107	84	3.8	5.5
Med046	1	1	67	28.0928	3	74	106	2	5.9
Med047	2	2	73	26.7165	1	65	72	6.4	4.2
Med047	2	2	73	26.358	2	83	71	5.3	2.7
Med047	2	2	73	26.2074	3	57	59	6.9	3
Med048	1	2	65	29.7884	1	157	71	7.2	3.9
Med048	1	2	66	30.1659	2	152	55	6.4	4.2
Med048	1	2	66	30.0151	3	188	71	6.7	4
Med049	1	2	66	24.403	1	92	78	1.1	5.1
Med049	1	2	66	24.363	2	101	88	1.2	5.8
Med049	1	2	66	23.7753	3	134	96	0.4	3.6
Med050	2	2	70	24.9968	1	75	76	2.1	1.8
Med050	2	2	70	24.8522	2	67	81	2.7	2.9
Med050	2	2	70	24.8802	3	71	81	2.9	3.5
Med051	2	2	70	42.625	1	100	49	3.5	2.2
Med051	2	2	71	42.4049	2	109	47	3.7	2.8
Med051	2	2	71	41.5396	3	139	6.7	3.5	2.4
Med053	2	2	66	32.5513	1	83	93	7.5	5.8
Med053	2	2	66	32.4682	2	114	68	6.5	4.5
Med053	2	2	67	32.1898	3	56	20	1.6	2
Med054	2	1	66	35.5566	1	112	80	5.1	2.5
Med054	2	1	66	35.2212	2	162	76	4.5	3.4
Med054	2	1	66	35.219	3	134	81	9.7	5.1
Med056	2	2	77	25.0386	1	140	56	3.2	3.7
Med056	2	2	77	23.8798	2	121	72	2.7	3.8
Med056	2	2	77	23.9685	3	54	34	2.1	2.5
Med059	2	1	70	24.8482	1	108	98	3	3.2
Med059	2	1	70	24.9289	2	102	75	3.2	2.7
Med059	2	1	71	25.0658	3	131	100	3.3	2.8
Med060	2	1	65	29.5455	1	126	54	4.1	5.1
Med060	2	1	66	28.7712	2	70	75	2.8	5.5
Med060	2	1	66	28.6179	3	82	73	2.7	4.6
Med061	1	2	70	29.7531	1	216	71	3.6	3.8
Med061	1	2	70	29.537	2	123	63	2.5	3.6
Med061	1	2	70	28.9146	3	126	64	4.2	4
Med062	2	1	72	25.4097	1	210	86	4.7	3.7
Med062	2	1	72	25.4097	2	144	127	4	4.2
Med062	2	1	72	25.4886	3	169	121	5.7	4.6
Med063	2	2	73	22.7384	1	110	91	5.3	4.5
Med063	2	2	74	22.1039	2	64	44	4.2	3.8
Med063	2	2	74	22.042	3	112	80	5.8	5.2
Med064	2	1	76	27.1589	1	73	56	1.1	2.6
Med064	2	1	76	26.8101	2	31	56	0.8	2.2
Med064	2	1	76	26.7335	3	121	83	1.9	3.1
Med065	2	2	69	22.0829	1	71	79	2.5	1.6
Med065	2	2	69	22.021	2	66	42	2.1	1.8
Med065	2	2	69	21.2003	3	49	47	1.4	1.3
Med066	2	1	66	33.6229	1	113	53	3.5	1.8
Med066	2	1	66		2
Med066	2	1	66		3
Med067	2	1	74	24.3882	1	35	38	1.1	1.5
Med067	2	1	74	23.858	2	31	29	1.4	1.6
Med067	2	1	74	23.8039	3	99	73	3.9	4.7
Med068	1	1	78	25.8361	1	111	89	0.9	3.4
Med068	1	1	78		2
Med068	1	1	79		3
Med069	2	1	72	28.4287	1	137	80	3.3	3.5
Med069	2	1	72		2
Med069	2	1	72		3
Med070	2	2	70	32.5733	1	127	77	4.2	5.4
Med070	2	2	70	33.4808	2	110	69	4.5	4.1
Med070	2	2	70	33.8572	3	84	60	2.1	3.9
Med072	2	1	65	22.6342	1	82	69	6	6.6
Med072	2	1	65	22.2336	2	72	61	4.7	5.4
Med072	2	1	65	22.4974	3	91	91	4.5	5.4
Med073	2	2	75	23.4362	1	106	72	4.1	3.6
Med073	2	2	75	23.345	2	85	42	3.5	3
Med073	2	2	75	23.6909	3	98	37	3.7	3.6
Med074	1	2	68	25.8843	1	86	38	4	3
Med074	1	2	68	26.474	2	108	76	5.3	4.2
Med074	1	2	69	26.4359	3	91	55	4.8	3.4
Med075	1	2	82	31.2324	1	142	121	0.8	5.9
Med075	1	2	82	31.2421	2	95	92	0.3	4.5
Med075	1	2	82	31.5987	3	171	107	0.7	7.1
Med076	2	2	64	27.2872	1	46	58	0.9	2
Med076	2	2	65	27.7968	2	68	62	1	3
Med076	2	2	65	27.1356	3	27	63	1.6	1.8
Med077	1	1	79	22.637	1	126	102	2.4	5.8
Med077	1	1	79	23.1983	2	153	119	3.4	6.3
Med077	1	1	80	23.4452	3	180	81	10.6	6
Med078	1	2	77	30.5021	1	119	93	2.5	6
Med078	1	2	78	29.3586	2	205	85	4	6.5
Med078	1	2	78	28.304	3	96	107	3.2	6
Med079	2	2	79	27.2932	1	97	65	3.7	4
Med079	2	2	80	26.1102	2	137	64	3.6	3.8
Med079	2	2	80	25.2673	3	141	88	4.9	5.1
Med080	1	1	67	27.5055	1	95	78	1.5	5.1
Med080	1	1	68	27.9979	2	nd	nd	nd	nd
Med080	1	1	68	29.0017	3	47	46	1.6	3.8
Med081	2	2	72	28.7428	1	99	53	3.1	3.1
Med081	2	2	73	28.1828	2	108	74	3.4	4.5
Med081	2	2	73	28.1646	3	76	62	2.4	2.4
Med082	1	2	69	27.6421	1	91	74	2	2.3
Med082	1	2	70	27.0037	2	183	78	2.5	2.5
Med082	1	2	70	27.5783	3	178	93	3.3	4
Med083	2	1	77	26.5794	1	174	74	7.1	13.9
Med083	2	1	77	26.0544	2	105	66	5.5	6.8
Med083	2	1	77	26.7986	3	133	64	6.6	6.8
Med084	2	1	68	25.092	1	95	48	3	5.2
Med084	2	1	68	25.4845	2	54	62	1.3	4.4
Med084	2	1	68	25.1803	3	67	35	2.6	7.3
Med085	2	1	68	34.0289	1	102	100	6.5	7.5
Med085	2	1	68	33.3286	2	67	72	5.8	6.1
Med085	2	1	68	33.7534	3	59	84	5.6	6.2
Med086	1	1	66	24.3616	1	127	100	4.4	7.7
Med086	1	1	66		2
Med086	1	1	66		3
Med087	1	1	86	19.1716	1	133	98	6.4	5.5
Med087	1	1	86	19.3094	2	106	85	4	5.2
Med087	1	1	86	19.2219	3	84	51	3	3.1
Med088	2	1	67	22.7334	1	85	52	7	5.2
Med088	2	1	67	22.5973	2	54	62	4.8	4.8
Med088	2	1	67	22.3514	3	110	75	6.8	3.7
Med089	2	1	65	22.0985	1	53	56	3.4	5.4
Med089	2	1	65	21.742	2	60	51	2.4	4.8
Med089	2	1	65	21.4925	3	70	73	3.8	5.2
Med090	1	1	65	27.5131	1	230	117	5.5	6.1
Med090	1	1	65	27.7163	2	122	145	7.6	9.3
Med090	1	1	65		3
Med091	1	1	68	21.8672	1	142	103	2.6	5.8
Med091	1	1	68	21.5971	2	164	107	3	6.6
Med091	1	1	69	21.9991	3	174	113	3.3	7.6
Med092	2	2	68	29.1312	1	77	59	2.8	3
Med092	2	2	69	29.0063	2	82	65	2.8	2.6
Med092	2	2	69	28.705	3	68	84	2.5	2.6
Med093	1	1	76	26.9284	1	142	63	5.2	1.6
Med093	1	1	76	25.4977	2	125	72	8.6	3.9
Med093	1	1	76	25.0767	3	138	87	6.9	2.7
Med094	2	1	74	29.5381	1	67	49	2.8	1.3
Med094	2	1	74	28.0849	2	100	74	3.8	2.1
Med094	2	1	74	27.5083	3	65	67	2.2	1.8
Med097	1	1	75	31.354	1	230	143	10.4	13.2
Med097	1	1	75	31.5139	2	215	114	8.7	13
Med097	1	1	75	31.6047	3	150	99	6.4	11.4
Med098	2	1	70	25.189	1	78	93	4.5	5.1
Med098	2	1	70	24.9696	2	96	110	5.6	4.9
Med098	2	1	70	25.9121	3	100	113	3.8	1.9
Med099	2	2	67	24.2858	1	153	59	5.4	2.7
Med099	2	2	67	23.9511	2	92	63	6.8	5
Med099	2	2	67	24.1166	3	47	71	5.9	4.3
Med100	1	1	68	34.3021	1	138	67	3.4	2.1
Med100	1	1	68	34.1121	2	152	75	3	2.5
Med100	1	1	68	34.2964	3	76	66	4	2.4
Med101	1	1	67	30.4278	1	281	108	5.3	5.5
Med101	1	1	67	30.4221	2	128	92	4.5	4
Med101	1	2	68	30.9279	3	122	122	3.9	4.9
Med102	1	2	67	28.7005	1	192	90	5.6	4.1
Med102	1	2	68		2
Med102	1	1	68		3
Med103	2	1	77	21.9671	1	111	78	4.9	5.9
Med103	2	1	77	22.3796	2	91	66	3.5	3.2
Med103	2	1	77	22.1859	3	87	96	4.3	4.7
Med104	1	1	76	23.197	1	69	55	2.9	3.2
Med104	1	1	77	22.8949	2	170	83	5.9	6.4
Med104	1	1	77	22.6889	3	62	48	4	4.1
Med105	2	1	70	32.6348	1	105	61	3.3	4.4
Med105	2	1	70		2
Med105	2	1	70		3
Med106	1	2	66	27.4272	1	109	46	2.8	4.4
Med106	1	2	66	27.4956	2	94	72	3.6	4.6
Med106	1	2	67	27.564	3	146	89	4.5	5.4
Med107	2	2	73	32.4764	1	83	37	1	1.7
Med107	2	2	73	32.2909	2	115	48	1.5	2.7
Med107	2	2	74	32.3115	3	71	41	1	1.5
Med108	2	1	80	19.5109	1	90	59	3.7	5.1
Med108	2	1	80	19.2747	2	88	75	3.3	6.7
Med108	2	1	80	19.1351	3	119	71	4.3	8
Med109	2	1	69	27.9695	1	139	120	5.9	7.6
Med109	2	1	70	27.2785	2	178	92	4.6	8.3
Med109	2	1	70	27.1477	3	120	109	3.8	5.8
Med110	1	1	66	28.5052	1	175	102	2.4	6.4
Med110	1	1	67	27.3174	2	169	49	2.8	4.5
Med110	1	1	67	27.0621	3	111	108	3.3	6.2
Med112	2	2	68	25.0329	1	170	98	4.6	6.4
Med112	2	2	69	25.4362	2	183	84	4.4	8.1
Med112	2	2	69	24.6154	3
Med113	2	1	69	26.6141	1	58	89	2.9	3.1
Med113	2	1	69	26.8697	2	43	93	2.5	5
Med113	2	1	69	27.2825	3	71	68	4.6	3.7
Med115	2	1	73	21.9992	1	77	83	2	4.6
Med115	2	1	73	21.2637	2	47	61	1.2	4.3
Med115	2	1	74	20.619	3	45	93	1.6	5
Med116	1	2	68	25.2795	1	48	63	2	4
Med116	1	2	68	25.3177	2	12	63	1.2	4.5
Med116	1	2	74	24.7093	3	4	38	2	5.2
Med117	1	1	65	27.2034	1	92	82	1.8	4.4
Med117	1	1	65	26.9976	2	186	174	5	6.6
Med117	1	1	65	27.1739	3	118	118	6.2	7.4
Med118	2	2	75	19.9929	1	90	65	1.3	4.8
Med118	2	2	75	19.9522	2	79	73	1.8	4.9
Med118	2	2	76	20.3849	3	62	77	1	5
Med119	1	2	73	28.0836	1	66	86	4.4	6.8
Med119	1	2	73	28.7504	2	184	124	6.8	9
Med119	1	2	73	28.0634	3	104	102	4	7.1
Med120	2	2	69	24.3062	1	64	64	2.6	5.7
Med120	2	2	69	24.6285	2	65	75	2.2	5.8
Med120	2	2	69	24.7831	3	73	70	3	4.9
Med121	2	1	67	25.734	1	160	105	3.1	6
Med121	2	1	67	25.6143	2	156	68	4	4.6
Med121	2	1	67	25.299	3	83	75	4.9	8.1
Med122	2	2	72	26.1466	1	218	95	3.6	3.6
Med122	2	2	72	26.3531	2	76	74	3.2	2.5
Med122	2	2	72	26.5539	3	116	61	3.1	2.6
Med123	1	1	72	24.1746	1	236	99	5.5	3.9
Med123	1	1	72	24.4926	2	126	113	5	3.9
Med123	1	1	73	23.9591	3	135	98	7.4	4.9
Med124	2	1	74	27.3312	1	87	69	2.3	2.6
Med124	2	1	75	28.5934	2	71	60	2.4	2.2
Med124	2	1	75	28.0515	3	50	48	2.2	2.9
Med125	1	2	69	23.9689	1	192	159	4.9	7.4
Med125	1	2	69	23.27	2	166	155	6	8.7
Med125	1	2	69	23.1764	3	141	145	5.2	9.3
Med126	1	2	66	26.0125	1	112	72	3.4	4
Med126	1	2	66	26.4654	2	161	85	4.9	4.5
Med126	1	2	66	25.7306	3	76	75	5.6	5.9
Med127	1	2	68	24.5514	1	163	117	5.4	5.6
Med127	1	2	68	23.9817	2	138	95	4.9	5.8
Med127	1	2	68	24.0196	3	130	106	5.8	7.9
Med129	2	1	65	28.7184	1	172	77	3.2	8.6
Med129	2	1	66	27.3069	2	219	107	4.7	11
Med129	2	1	66		3
Med130	2	1	70	27.2903	1
Med130	2	1	70	27.7746	2	83	83	5.3	3.7
Med130	2	1	71	28.7576	3	113	73	5.7	5.7
Med131	1	2	75	26.746	1	83	49	1.7	3.5
Med131	1	2	76	25.4462	2	158	102	3.6	6.4
Med131	1	2	76	27.2285	3	144	98	1.8	5.2
Med132	1	2	79	23.953	1	165	60	7	4.4
Med132	1	2	79	23.9951	2	155	58	6	4
Med132	1	2	80	24.1702	3	120	40	7.6	5.1
Med134	2	2	65	29.4221	1	141	75	4.2	6
Med134	2	2	65	29.4221	2	142	80	5.9	6.6
Med134	2	2	65	29.9638	3	100	85	5.3	4.6
Med135	2	2	76	27.9792	1	140	42	5.8	2.2
Med135	2	2	76	28.3828	2	106	69	8.7	4.2
Med135	2	2	76	27.2955	3	68	41	4.8	2.7
Med136	1	1	79	28.37	1	117	69	4.5	2.6
Med136	1	1	80	28.2504	2	83	74	4.5	2.6
Med136	1	1	80	27.784	3	86	66	5.8	3.9
Med137	2	2	70	26.7214	1	56	46	2.5	2.5
Med137	2	2	70	27.0974	2	111	60	5.8	5.8
Med137	2	2	70	25.6985	3	94	72	2.8	4.2
Med138	1	2	67	29.019	1	128	88	5.1	4
Med138	1	2	67	28.4945	2	202	78	5.7	4
Med138	1	2	67	28.3474	3	224	72	7.9	4.8
Med139	2	2	65	27.8054	1	108	83	3.3	7.5
Med139	2	2	65	27.9457	2	88	77	1.9	3.7
Med139	2	2	65	27.8105	3	107	63	3.6	5
Med140	2	2	75	28.9127	1	142	71	1.9	5.1
Med140	2	2	75	28.8072	2	73	73	2	3.7
Med140	2	2	75		3
Med141	1	1	74	28.0993	1	96	126	5.2	5.2
Med141	1	1	75	28.0644	2	124	101	7	4.1
Med141	1	1	75	27.7429	3	61	127	5.6	4.9
Med142	2	1	69	23.0118	1	51	95	1.3	2.1
Med142	2	1	69	23.1445	2	96	105	1.4	2.6
Med142	2	1	70	23.0767	3	70	103	1.1	3
Med143	2	2	79	20.7899	1	133	64	6.2	3
Med143	2	2	79	20.99	2	153	67	6.9	3.2
Med143	2	2	79	20.9637	3	129	50	5.2	2.2
Med145	2	2	71	27.3633	1	121	79	4	4.7
Med145	2	2	71	27.4286	2	160	120	7.2	6.9
Med145	2	2	71	26.5044	3	102	65	4.5	4.5
Med146	1	1	81	25.2635	1	72	53	0.5	3
Med146	1	1	81	25.6016	2	87	63	0.6	2.8
Med146	1	1	81	25.5021	3	77	63	0.6	2.7
Med147	1	2	74	27.5134	1	153	120	1.9	2.2
Med147	1	2	74	27.4124	2	92	85	1.4	1.7
Med147	1	2	74	27.1369	3	100	91	1.7	3.3
Med148	2	1	67	25.5751	1	24	94	1.4	5.3
Med148	2	1	67	24.8255	2	44	56	1.7	3.7
Med148	2	1	67	24.8886	3	35	62	1.9	5.5
Med149	1	1	75	27.0776	1	75	46	1.8	3
Med149	1	1	75	26.3875	2	191	91	4.5	5.6
Med149	1	1	75	26.6444	3	168	81	2.3	3.7
Med150	2	1	71	29.993	1	72	58	3	6
Med150	2	1	71	28.434	2	48	36	1.4	3.2
Med150	2	1	71	27.8675	3	88	76	2	4.7
Med152	2	1	72	35.974	1	95	42	5.7	3.4
Med152	2	1	72		2
Med152	2	1	72		3
Med154	1	2	69		1	92	116	5.5	7.5
Med154	1	2	69	32.0959	2	121	129	3.4	5
Med154	1	2	70	32.1004	3	84	124	2.8	0.4
Med155	2	1	77	26.3277	1	107	37	0.3	3.2
Med155	2	1	77	26.6373	2	121	50	0.9	4.6
Med155	2	1	78	26.282	3	112	60	0.8	4.3
Med156	2	2	67	25.9676	1	139	72	4	3.3
Med156	2	2	67	25.3316	2	119	64	2.2	3
Med156	2	2	67	23.96	3	173	77	4.7	3.7
Med157	1	1	65	24.6103	1	147	78	2.5	2.2
Med157	1	1	66	23.8548	2	131	42	4.2	3
Med157	1	1	66	23.4201	3	107	67	3.4	3
Med159	1	2	67	23.1216	1	119	99	ND	3.7
Med159	1	2	67	23.0796	2	114	74	4.4	4.4
Med159	1	2	67	23.2107	3	172	150	5.4	6.5
Med160	2	2	64	34.9268	1	90	77	3.3	3.5
Med160	2	2	65	35.0552	2	173	83	4.2	3.8
Med160	2	2	65	35.4418	3	114	75	4.8	3.1
Med162	1	2	65	27.125	1	76	88	3.2	5.3
Med162	1	2	65	28.2256	2	148	71	2	6.8
Med162	1	2	65	28.2117	3	105	50	1.7	4
Med163	1	2	70		1
Med163	1	2	71		2
Med163	1	2	71		3
Med164	2	2	70		1
Med164	2	2	70		2
Med164	2	2	70		3
Med166	1	2	66	33.0889	1	145	90	2.3	4.2
Med166	1	2	66	32.8956	2	179	86	2.5	4.2
Med166	1	2	66	32.7873	3	107	90	2.4	3.1
Med167	2	2	74	24.2916	1	50	74	3.4	3.1
Med167	2	2	74	24.9733	2	54	82	2.8	2.9
Med167	2	2	74	24.2916	3	120	36	4.8	3.1
Med168	1	1	72	27.2311	1	169	150	5.2	4.8
Med168	1	1	73	26.9508	2	143	128	3.4	4.2
Med168	1	1	73	27.1262	3	185	118	6.1	5.8
Med169	2	1	71	27.0337	1	252	91	2.9	7.3
Med169	2	1	71	26.7022	2	163	117	3.1	6.8
Med169	2	1	71	26.835	3	169	113	2.1	6.3
Med170	2	2	71	28.439	1	60	74	5.5	7.7
Med170	2	2	72	29.0619	2	160	105	6	6.2
Med170	2	2	72	29.3888	3	152	113	7.9	7
Med171	1	2	79	24.4226	1	124	76	4.7	4.8
Med171	1	2	80	24.5943	2	135	91	5.1	4.6
Med171	1	2	80	24.5861	3	191	110	4.9	4.9
Med172	2	1	67	25.2846	1	97	47	1.7	2.2
Med172	2	1	67	25.071	2	115	57	2.4	4.2
Med172	2	1	67	25.3323	3	114	58	2.1	3.7

## Sheet: 7. Flavonoid intakes
TABLE S1.7 MEDLEY RAW DATA, FLAVONOID INTAKES (MG)
StudyID	visitID	Visit 1=BL, 2=2month, 3=4month	ID_number	Age at visit 1	Gender 1=male,2=female	Diet 1=med,2=hab	Completion Status 1=complete,2=withdrawn,3=never commenced	Energy	Energy_MJ	Total Flavonoids	Total Anthocyanidins	Total Flavan3ols	Total Flavanones	Total Flavones	Total Flavonols	Total Isoflavones	Total Carotenoids	Cyanidin	Delphinidin	Malvidin	Pelargonidin	Peonidin	Petunidin	Epicatechin	Epoicatechin 3-gallate	Epigallocatechin	Epigallocatechin 3-gallate	Catechin	Gallocatechin	Theaflavin	Theaflavin-3, 3'-digallate	Theaflavin-3'-gallate	Thearubigins	Hesperetin	Naringenin	Eriodictyol	Apigenin	Luteolin	Isorhamnetin	Kaempferol	Myricetin	Quercetin	Alpha-carotene	Beta-carotene	Beta-cryptoxanthin	Lutein + Zeaxanthin	Lycopene	Daidzein	Genistein
Med001	BL	1	1	68	2	2	1	8500.28	8.5	685.654	2.81647	547.869	82.4013	19.096	33.382	0.0895067	16.5867	2.43847	0.125	0.005	0.241	0	0.007	403.809	0.0052	0.583333	0.0468	143.424	0	0	0	0	0	52.5925	29.7504	0.0583333	16.3494	2.74658	0.616	2.89543	2.02033	27.8502	0.0507785	1.04184	0.314325	1.26803	13.9117	0.04266	0.0468467
Med001	2month	2	1	68	2	2	1	5727.84	5.73	20.2895	1.59355	8.67806	0.597267	0.470552	8.90623	0.0438552	22.2588	1.57743	0.00379259	0	0.00379259	0.00853333	0	5.75162	0.0018963	0.910807	0.310993	1.70274	0	0	0	0	0	0	0.5681	0.0291667	0.15206	0.318492	0.31086	0.977	0.197805	7.42056	0.770823	2.46549	0.133525	0.808128	18.0808	0.0247043	0.019151
Med001	4month	3	1	68	2	2	1	9448.1	9.45	33.1685	3.25597	7.47763	4.9987	0.582753	16.7303	0.123113	28.3595	3.24793	0	0	0.00803333	0	0	3.16277	0.0126667	1.94033	0.107667	2.2542	0	0	0	0	0	2.26697	1.81053	0.9212	0.389647	0.193107	2.2149	2.79075	0.284983	11.4397	0.233997	13.293	0.147	8.79182	5.89371	0.0605533	0.05276
Med002	BL	1	2	66	2	1	1	8222.22	8.22	294.947	183.449	75.8905	23.866	0.53699	11.122	0.0817829	5.81095	2.18968	15.4267	127.379	15.1606	8.27708	15.0161	45.5882	0.101362	1.00265	0.266648	28.8638	0.0678	0	0	0	0	9.47585	13.3842	1.00597	0.123163	0.413827	0.171848	1.10554	0.719859	9.12478	0.185185	4.54929	0.0878867	0.585256	0.403333	0.0411598	0.0406231
Med002	2month	2	2	66	2	1	1	8913.41	8.91	239.974	156.339	42.8615	27.8397	1.47496	11.4022	0.056355	7.74529	2.89281	10.3167	107.742	15.7321	7.04974	12.6059	22.357	0.110375	1.03303	0.278917	18.9971	0.0849708	0	0	0	0	6.29127	19.7481	1.80029	0.766492	0.708469	0.520786	0.919543	0.760352	9.20155	1.6115	4.083	0.0180533	1.01836	1.01438	0.02027	0.036085
Med002	4month	3	2	66	2	1	1	9485	9.49	166.834	112.515	24.4483	12.7185	3.5853	13.4976	0.0694133	8.51986	2.44944	6.40333	73.0384	18	5.3253	7.29847	11.0788	0.1989	0.881633	0.0795667	12.1211	0.0883167	0	0	0	0	8.01932	2.33385	2.36537	1.65046	1.93483	1.6437	0.926192	0.511494	10.4162	0.457198	4.01435	0.248	0.696933	3.10337	0.0218242	0.0475892
Med003	BL	1	3	72	2	2	1	11660.2	11.66	94.8468	38.6788	47.6306	0.462308	0.55519	7.38614	0.133755	9.53734	3.65196	4.91174	25.4702	0.00207407	1.65302	2.9898	32.4171	0.0156912	1.51001	0.284116	13.3938	0.0099	0	0	0	0	0.0779625	0.32357	0.060775	0.0794842	0.475706	0.854171	0.229163	0.133966	6.16884	1.31129	6.88257	0	0.164267	1.17922	0.0329431	0.0274784
Med003	2month	2	3	72	2	2	1	8662.57	8.66	281.119	200.055	58.6236	11.2498	0.825012	10.3616	0.00396	38.008	5.17585	14.1148	148.578	5.09516	9.62768	17.463	33.3155	0.0643076	1.32407	0.317269	23.5385	0.0639	0	0	0	0	6.22193	4.87498	0.15285	0.113994	0.711018	0.627459	0.333648	0.653151	8.74731	0.0532979	1.61931	0.112202	0.483812	35.7394	0.00132	0.00264
Med003	4month	3	3	72	2	2	1	7853.2	7.85	91.0867	37.0528	33.3394	13.387	0.819257	6.45625	0.0320147	14.2079	2.03475	4.90967	25.4702	0	1.64835	2.9898	18.4043	0.0012375	0.954086	0.245	13.6576	0.0772333	0	0	0	0	10.6155	2.48006	0.291383	0.0990708	0.720186	0.0924495	1.61637	0.276436	4.471	3.72179	8.29944	0.420313	0.923923	0.842425	0.016516	0.0154987
Med004	BL	1	4	78	2	1	1	6149.89	6.15	49.2134	9.34204	15.8804	14.0009	0.889273	9.0748	0.0260009	6.72292	1.86895	7.46606	0	0.00216296	0.00486667	0	6.6849	0.0120815	0.677604	0.270863	8.23492	0	0	0	0	0	8.72	5.28093	0	0.560001	0.329272	1	0.674212	0.34881	7.05178	1.42428	2.99922	0.0899148	0.525591	1.68392	0.0151338	0.0108671
Med004	2month	2	4	78	2	1	1	5230.12	5.23	55.2485	5.34486	11.0223	25.1607	1.40363	12.1975	0.119516	4.83512	0.365777	4.97667	0	0.000740741	0.00166667	0	4.7009	0.00037037	0.190446	0.0607407	6.06989	0	0	0	0	0	16.0775	9.07773	0.0055	0.885853	0.517782	1.70512	0.962258	0.521357	9.00872	1.2439	2.64503	0.09078	0.724333	0.131083	0.0297111	0.0164711
Med004	4month	3	4	78	2	1	1	6541.3	6.54	61.6703	18.2593	7.13109	28.4043	0.348847	7.35102	0.175784	5.20884	1.88842	5.11453	0.0044	10.9362	0.2673	0.0484	0.339921	0.066	0.706094	0.0484	5.95748	0.0132	0	0	0	0	17.5308	10.8447	0.02871	0.08762	0.261227	1.00458	0.729454	0.318867	5.29812	0.157778	0.858249	0.0820067	0.44047	3.67033	0.0510701	0.0367136
Med005	BL	1	5	80	1	1	1	9807.47	9.81	118.508	5.73474	13.3569	88.5874	1.24822	9.48858	0.0919673	6.07619	2.12259	2.51028	0.000437333	1.08913	0.00749067	0.00481067	7.69799	0.0187387	0.743447	0.291612	4.60377	0.001312	0	0	0	0	59.1451	29.295	0.147333	0.559975	0.688241	0.583215	0.943824	0.54392	7.41762	1.47006	3.22783	0.320853	1.05745	0	0.0529503	0.039017
Med005	2month	2	5	80	1	1	1	8585	8.59	72.4956	6.60123	14.2862	25.5018	2.67015	23.2814	0.154758	8.29275	1.60246	4.98178	0	0.0106565	0.00633333	0	6.62334	0.00140741	0.840141	0.230815	6.59047	0	0	0	0	0	16.168	9.23559	0.0982875	1.75917	0.910978	3.61635	1.49106	0.894563	17.2795	2.47609	4.77163	0.09078	0.76267	0.191583	0.0389446	0.0241469
Med005	4month	3	5	80	1	1	1	10150.9	10.15	112.085	14.8571	8.50316	76.0586	0.657811	11.8354	0.172914	6.83369	3.18675	0.143578	0.0044	10.9551	0.51885	0.0484	4.35636	0.0673889	1.0386	0.276178	2.75143	0.0132	0	0	0	0	47.7776	28.1256	0.15549	0.104433	0.553378	1.20412	0.913642	0.531511	9.18608	0.222202	1.18944	0.220133	0.684587	4.51733	0.0491112	0.0358024
Med006	BL	1	6	82	2	1	1	7657.26	7.66	87.8895	37.1836	11.4057	15.6062	1.37819	12.9211	9.39472	14.8148	1.17553	18.3621	12.8262	0.00691042	0.121417	4.69133	0.285289	0.021875	0.05	0	11.0486	0	0	0	0	0	6.8356	8.68038	0.0902188	0.00521744	1.37298	0.054945	4.0535	0.632995	8.17963	2.98691	6.9758	0.480229	2.61158	1.76024	3.70846	4.58203
Med006	2month	2	6	82	2	1	1	6492.06	6.49	116.816	39.0558	15.6729	4.4797	0.312445	5.90098	51.3937	12.0919	3.23127	2.64627	28.0172	0.009	1.86319	3.28878	7.09226	0.00302792	0.649163	0.132	7.76177	0.03469	0	0	0	0	3.51143	0.905928	0.0623458	0.0674538	0.244991	0.163386	1.07845	0.431601	4.22754	2.43883	7.35355	0.292707	1.85969	0.147153	21.1404	25.6972
Med006	4month	3	6	82	2	1	1	6193.7	6.19	112.892	39.5227	16.2202	1.03276	0.832335	12.346	42.9381	20.5751	3.08456	2.64627	28.0172	0.672683	1.81319	3.28878	7.96262	0.00136125	0.0081675	0	8.15802	0.090045	0	0	0	0	0.266659	0.629751	0.13635	0.333505	0.498831	0.0179713	1.92849	0.555991	9.84355	2.85317	13.7921	0.681892	2.38674	0.861247	17.7883	21.521
Med007	BL	1	7	81	1	2	1	8269.14	8.27	380.359	274.554	72.5661	22.4918	1.52656	9.20995	0.0113	23.4586	2.43093	24.7467	203.764	6.46216	13.2024	23.947	37.7767	0.0628944	0.846636	0.237397	33.5555	0.087	0	0	0	0	11.6787	10.8131	0	0.172033	1.35453	0.29035	0.497517	0.903689	7.51839	2.01504	5.91978	0.27422	0.445653	14.8039	0.00456667	0.00673333
Med007	2month	2	7	81	1	2	1	8873.02	8.87	428.011	332.034	81.8544	3.28948	0.382472	10.439	0.01182	5.29205	0.235125	30.708	254.702	0.006975	16.4835	29.898	41.6591	0.012375	0.07425	0	40.0097	0.099	0	0	0	0	0.870075	2.35123	0.068175	0.172195	0.210277	0.311775	1.52928	1.02448	7.57343	0.76034	1.71574	0	0.1314	2.68457	0.00298	0.00884
Med007	4month	3	7	81	1	2	1	10945.8	10.95	303.696	226.336	64.266	2.52267	0.346483	10.225	0	6.4919	0.66775	24.906	169.841	0	10.989	19.932	28.5803	0.00825	0.0495	0	35.3801	0.2478	0	0	0	0	0.786417	1.73625	0	0.207783	0.1387	0.07425	2.39806	0.75835	6.99433	0.0157133	0.642512	0.059126	0.343718	5.43083	0	0
Med008	BL	1	8	75	1	1	1	8672.94	8.67	336.886	228.633	77.9286	15.3661	0.887656	14.0223	0.0479521	9.43294	2.96228	16.4883	174.048	3.40319	11.2864	20.4453	45.5675	0.603301	1.34305	0.622189	29.7208	0.07175	0	0	0	0	10.4709	4.80682	0.0884	0.15699	0.730666	0.100396	2.33287	0.88228	10.7068	2.1206	5.14574	0.34318	1.52092	0.3025	0.0253836	0.0201186
Med008	2month	2	8	75	1	1	1	9344.4	9.34	228.291	150.807	44.9146	8.26143	3.64777	19.7763	0.884307	16.1789	4.27386	9.82815	101.887	16.1564	6.63007	12.0307	23.4387	0.231376	1.39124	0.319685	19.4699	0.0637667	0	0	0	0	5.90445	2.26092	0.09606	1.90281	1.74496	2.15302	1.43838	1.28835	14.8965	4.57287	8.95292	0.284937	1.54135	0.826833	0.44898	0.435327
Med008	4month	3	8	75	1	1	1	8070.8	8.07	287.518	218.971	43.3951	5.05125	2.11696	17.7876	0.195507	9.95785	5.35926	25.3901	144.468	10.788	7.49225	25.4733	22.4566	0.19014	1.08919	0.270389	19.3281	0.0605667	0	0	0	0	2.6048	1.65447	0.791978	0.260473	1.85649	0.339512	2.25523	2.05044	13.1424	1.92587	4.60974	0.0261604	1.93147	1.4646	0.0790089	0.0724979
Med009	BL	1	9	72	2	1	1	8615.6	8.62	198.946	122.45	25.4566	39.8772	1.48675	9.64618	0.0291593	3.04361	3.2719	15.0821	84.6678	0.0084	4.31828	15.1017	14.2704	0.0191104	0.414354	0.137442	10.5905	0.02475	0	0	0	0	24.9212	14.956	0	0.0877435	1.39901	0.229094	1.9653	1.19782	6.25396	0.428426	1.15347	0.284172	0.522127	0.655417	0.0155538	0.0111555
Med009	2month	2	9	72	2	1	1	7519.96	7.52	259.215	193.08	37.3647	2.30567	4.89602	21.3502	0.218536	14.6231	4.59472	23.6563	134.153	0.013	6.8989	23.7632	20.2273	0.136283	0.3537	0.126667	16.4764	0.0442667	0	0	0	0	0.8067	1.28597	0.213	1.73204	3.16398	1.41458	3.40437	2.31104	14.2202	3.87425	8.37949	0.459183	1.05311	0.857083	0.110911	0.107625
Med009	4month	3	9	72	2	1	1	7435.9	7.44	303.598	233.932	42.2035	6.78672	3.23862	17.3474	0.0904401	9.56899	4.99452	27.2702	155.441	10.7877	8.0602	27.3779	20.7424	0.156108	0.899555	0.129167	20.2138	0.0625333	0	0	0	0	2.63079	3.36395	0.791978	1.10307	2.13555	0.341794	2.46764	2.11706	12.4209	1.75984	4.30362	0.0860629	1.79858	1.6209	0.0263423	0.0200979
Med010	BL	1	10	82	1	2	1	7137.07	7.14	173.466	127.293	33.1986	2.04878	1.15851	9.73897	0.0280836	11.7613	0.488053	9.38223	99.3339	0	6.42857	11.6602	16.2798	0.00482625	0.17495	0.01	16.6904	0.03861	0	0	0	0	0.304054	1.73318	0.01155	0.378448	0.780061	0.165404	1.79714	0.633325	7.14309	1.62606	4.52975	0.737	1.04688	3.82158	0.0115555	0.0165281
Med010	2month	2	10	82	1	2	1	6359.27	6.36	202.163	138.422	43.6259	5.38733	3.35933	11.3683	0	19.0177	1.85709	10.1053	106.975	0.00133333	6.92607	12.5572	24.0103	0.0185308	1.94002	0.217	17.3984	0.04158	0	0	0	0	0.327442	5.05989	0	1.99537	1.36396	0.954877	0.38367	0.620638	9.40908	3.26747	9.0733	2.35455	0.1781	4.14425	0	0
Med010	4month	3	10	82	1	2	1	7068.3	7.07	220.357	116.442	41.6918	23.774	2.24159	36.1942	0.0137067	14.2121	2.60555	8.43024	89.1458	0.0102941	5.78589	10.4643	25.3411	0.00803495	1.23525	0.607407	14.4654	0.03465	0	0	0	0	13.8979	9.87616	0	0.109462	2.13213	4.51458	0.994786	0.735709	29.9491	2.42798	4.97303	0.061	0.387467	6.36258	0.00342667	0.01028
Med011	BL	1	11	76	2	2	1	8114.26	8.11	75.43	48.8217	19.9179	1.23608	0.757807	4.67222	0.0242683	7.50444	2.2083	3.44817	36.5172	0	2.36264	4.28538	8.37196	0.00177375	1.02984	0.304	10.1315	0.07879	0	0	0	0	0.177746	1.05834	0	0.362565	0.395242	0.0159638	0.487952	0.737353	3.43096	0.74922	2.08775	0.75218	0.850413	3.06487	0.01024	0.0140283
Med011	2month	2	11	76	2	2	1	10448	10.45	78.5639	5.56921	25.0797	0.419605	0.715136	46.7352	0.045074	7.64077	5.50452	0.0240444	0	0.0240444	0.0166	0	15.6012	0.0171056	3.58778	0.719019	5.15457	0	0	0	0	0	0	0.364505	0.0551	0.204292	0.510844	3.05431	14.7873	0.274061	28.6196	1.1549	3.52961	0.00287	1.75348	1.19992	0.0146997	0.0303743
Med011	4month	3	11	76	2	2	1	7554.6	7.55	33.2025	3.57828	16.2498	4.80014	0.657565	7.89081	0.0258605	13.8677	3.57828	0	0	0	0	0	4.52903	0.08625	1.82813	0.506	9.29842	0.002	0	0	0	0	2.26697	1.76164	0.771533	0.273498	0.384067	0.07392	1.56213	0.470694	5.78406	1.57805	4.10049	0.215042	1.2385	6.73567	0.00738024	0.0184802
Med012	BL	1	12	71	2	1	1	6991.08	6.99	207.586	40.4793	9.82913	137.83	2.52368	15.4468	1.47616	11.3923	2.88331	0.471433	0.0148333	36.8724	0.0741667	0.163167	1.10586	0.231533	1.35166	0.244467	6.64911	0.2465	0	0	0	0	84.1396	53.249	0.441853	0.31026	2.21342	0.162624	5.66827	0.958271	8.65767	0.240462	2.68777	1.59429	2.91964	3.95015	0.489597	0.919559
Med012	2month	2	12	71	2	1	1	8845.17	8.85	193.181	84.7056	35.9577	48.0904	3.01232	21.361	0.05377	20.9836	3.3571	6.02005	63.7256	0.00754375	4.12088	7.4745	15.6724	0.16871	1.24529	0.3368	18.5034	0.0311667	0	0	0	0	30.2988	17.7581	0.0335438	1.12132	1.891	0.890124	4.79408	1.46853	14.2083	1.94474	7.76463	0.376695	5.66639	5.23114	0.0189267	0.0348433
Med012	4month	3	12	71	2	1	1	7827.1	7.83	186.961	67.2535	29.3908	57.4892	1.17018	31.6132	0.0440427	20.2484	2.19976	4.8186	50.9404	0.0183667	3.2967	5.9796	13.7853	0.377442	0.636753	0.105967	14.451	0.0343	0	0	0	0	35.8534	21.6159	0.0199	0.151042	1.01914	0.670252	8.98906	1.30311	20.6508	0.237043	6.11322	0.15982	8.51586	5.22243	0.0155253	0.0285173
Med013	BL	1	13	68	2	1	1	8433.94	8.43	40.5288	24.3536	11.9793	0.448427	0.102123	3.64026	0.0050925	13.4915	1.26527	7.65933	0.00616667	15.3242	0.0308333	0.0678333	2.37989	0.0925	0.561	0.0980833	8.82928	0.0185	0	0	0	0	0	0.440427	0.008	0.026325	0.0757978	0.08591	0.644685	0.109108	2.80056	0.0590029	2.46881	0.0642225	0.200677	10.6988	0.000606667	0.00448583
Med013	2month	2	13	68	2	1	1	6966.37	6.97	80.6863	43.1083	23.3217	1.30338	0.722276	12.0084	0.222265	18.7717	4.42035	2.08262	20.3812	12.4281	1.34921	2.44684	12.6286	0.0772196	1.14154	0.256659	9.19473	0.02292	0	0	0	0	0.20187	0.967487	0.134025	0.151612	0.570665	0.297836	2.92888	0.316679	8.46505	0.657761	2.68671	0.448484	0.751636	14.2271	0.106116	0.116149
Med013	4month	3	13	68	2	1	1	8002.8	8	76.9916	43.6602	17.7801	2.19151	1.40895	11.8204	0.13045	14.7803	3.46626	2.49883	25.4732	7.29153	1.90832	3.02207	7.15674	0.0985708	0.985088	0.177267	9.34159	0.0208333	0	0	0	0	0.0779625	2.09441	0.01914	0.568996	0.839954	0.213256	2.56247	1.72014	7.32455	0.721033	3.07984	0.393657	2.1871	8.39871	0.0411079	0.0343424
Med014	BL	1	14	76	1	2	1	7230.71	7.23	325.006	239.334	66.6063	2.87409	1.22872	14.9486	0.0140867	23.6448	2.00555	19.6476	178.294	6.87517	11.5523	20.959	35.5978	0.0568708	0.882791	0.0874542	29.8149	0.16648	0	0	0	0	0.746738	1.94286	0.1845	0.143812	1.08491	0.527068	3.13632	1.03721	10.248	2.91111	7.09801	0.0882	2.38545	11.162	0.00634	0.00774667
Med014	2month	2	14	76	1	2	1	7294.36	7.29	430.985	325.503	76.8089	16.1357	0.640235	11.8675	0.0298954	8.89593	0.362214	24.057	254.702	0	16.4835	29.898	41.7418	0.012375	0.110748	0.030625	34.7605	0.152867	0	0	0	0	11.4076	4.37335	0.354746	0.178287	0.461948	0.308867	1.42289	1.49559	8.64017	0.648798	1.58705	0.203488	0.385113	6.07148	0.0158989	0.0139965
Med014	4month	3	14	76	1	2	1	5504	5.5	217.202	162.759	41.664	3.15817	0.806632	8.68572	0.128426	6.08241	0.184229	12.0285	127.351	0.00482083	8.24175	14.949	21.9833	0.122854	0.0464583	0	19.4572	0.0541667	0	0	0	0	1.44794	1.33455	0.375687	0.105802	0.70083	0.0556875	1.8868	0.669825	6.07341	0.985247	2.69178	0.504087	0.759254	1.14204	0.0762881	0.0423381
Med015	BL	1	15	68	2	1	1	5801.29	5.8	54.162	4.8035	4.11068	35.0848	1.91599	8.23285	0.0141452	11.6406	0	4.8035	0	0	0	0	0.0133393	0	0.132	0	3.96534	0	0	0	0	0	21.4041	13.6808	0	1.16298	0.753012	0.86005	1.15105	0.628646	5.5931	2.53304	7.96048	0.343429	0.7255	0.0781458	0.00403929	0.010106
Med015	2month	2	15	68	2	1	1	5901.35	5.9	65.97	19.3405	8.79515	27.4917	1.65697	8.63524	0.0504606	19.5675	1.60952	0.217	0.007	17.395	0.035	0.077	3.27283	0.112	0.8067	0.14	4.44262	0.021	0	0	0	0	17.44	10.0311	0.020625	0.0104975	1.64647	0.2178	3.57988	0.242678	4.59488	4.35409	10.9597	0.0923206	2.63815	1.52328	0.0195011	0.0192261
Med015	4month	3	15	68	2	1	1	8363.6	8.36	67.9209	38.3	24.6579	0.539307	0.598725	3.78549	0.0394002	9.85266	5.78597	2.4057	25.4702	0	1.64835	2.9898	9.98543	0.0012375	1.70777	0.31	12.6436	0.0099	0	0	0	0	0.0779625	0.411844	0.0495	0.0565004	0.542224	0.533858	0.679931	0.136017	2.43569	2.3893	4.80827	0.188388	0.506415	1.96029	0.0147326	0.0246676
Med016	BL	1	16	74	1	2	1	9454.41	9.45	80.1075	27.0761	17.8184	15.6045	0.898254	18.6974	0.0129565	12.6986	16.7476	0.554526	0.121	9.44901	0.0602667	0.143667	11.0466	0.0586963	0.87397	0.318559	5.42066	0.09988	0	0	0	0	9.00585	5.83952	0.759092	0.111123	0.787131	1.4117	4.03363	0.496382	12.7557	0.960581	3.98859	0.205749	2.93652	4.60717	0.00631057	0.0066459
Med016	2month	2	16	74	1	2	1	11212.8	11.21	356.078	257.098	77.6177	8.39617	1.15305	11.8005	0.0120222	6.46433	0.95879	27.269	191.077	2.98454	12.3718	22.4367	39.334	0.0676738	0.388425	0.138085	37.5427	0.146783	0	0	0	0	4.1165	4.2541	0.0255688	0.597437	0.555609	0.181164	1.94411	0.985823	8.68938	0.544708	2.09541	0.237023	1.6333	1.95388	0.00635343	0.00566876
Med016	4month	3	16	74	1	2	1	11526	11.53	219.479	151.016	55.1474	3.68012	0.704554	8.91748	0.01382	7.05619	1.27394	17.0729	105.268	7.5456	6.65223	13.2032	29.7992	0.0707463	0.434161	0.0894593	24.7043	0.0495	0	0	0	0	1.3858	1.84458	0.449744	0.291831	0.412723	0.152062	1.51515	0.728197	6.52208	0.564565	2.45738	0.00415787	2.36206	1.66803	0.00752333	0.00629667
Med017	BL	1	17	76	1	1	1	7983.91	7.98	42.229	8.31111	22.1905	1.66152	0.430359	9.62593	0.0095	9.39157	0.836763	7.46636	0	0.00245926	0.00553333	0	9.32595	0.00122963	0.401474	0.201659	12.0825	0.17776	0	0	0	0	0.3752	1.00352	0.2828	0.293304	0.137055	0.215012	3.87796	0.265103	5.26786	0.866836	4.76925	0	0.154987	3.6005	0.0043	0.0052
Med017	2month	2	17	76	1	1	1			0	0	0	0	0	0	0	0
Med017	4month	3	17	76	1	1	1	8737.8	8.74	97.0901	28.1993	17.6606	40.7645	0.401786	10.0232	0.0407117	10.0724	4.58733	2.74999	0.00833333	20.712	0.0499667	0.0916667	8.32871	0.141911	2.01103	0.523522	6.54967	0.1058	0	0	0	0	31.395	1.67355	7.69594	0.06552	0.336266	0.5137	3.19755	0.144922	6.16703	2.62851	5.20481	0	0.105453	2.13362	0.009755	0.0309567
Med018	BL	1	18	66	2	2	1	9594.42	9.59	107.345	43.1925	24.719	24.6204	1.82977	8.71452	4.26897	5.29835	2.4766	10.5158	25.5142	0.0431694	1.65295	2.9898	9.56469	0.0182597	1.81385	0.261144	13.0264	0.0346333	0	0	0	0	14.7545	9.37308	0.492792	0.759228	1.07054	1.76278	1.26129	0.429936	5.26052	1.12695	2.50052	0.0735867	0.276025	1.32127	1.75383	2.19273
Med018	2month	2	18	66	2	2	1	7753.88	7.75	67.74	7.75645	13.5877	20.7018	3.44785	7.1513	15.0949	7.68629	1.67357	6.06901	0	0.00920741	0.00466667	0	5.03975	0.030537	1.03186	0.175074	7.30966	0.0008	0	0	0	0	7.99333	12.6393	0.0691667	3.21436	0.233487	1.2982	0.572261	0.284232	4.99661	0.812542	2.07575	0.03893	0.41357	4.3455	6.17753	7.73157
Med018	4month	3	18	66	2	2	1	7928.8	7.93	80.7466	8.41092	23.2467	36.0389	0.491907	10.4414	2.11671	12.6116	3.69085	4.683	0.0326667	0.00441042	0	0	6.37413	0.0401667	1.96213	0.6199	14.2504	0	0	0	0	0	22.4768	13.5451	0.0170437	0.02821	0.463697	0	2.77185	0.411767	7.25782	1.50902	4.31398	0.152089	1.91291	4.72363	0.872207	1.0784
Med019	BL	1	19	74	1	1	1	13485.8	13.49	25.7667	6.02571	9.20227	0.339993	0.475895	9.68097	0.0418421	7.38014	1.02312	4.99561	0	0.00698	0	0	3.05883	0	0.591237	0	5.5522	0	0	0	0	0	0.067	0.168452	0.104542	0.0412107	0.434684	0.57311	5.61175	0.159636	3.33647	0.335371	2.05782	0.153125	2.18058	2.65325	0.0173652	0.0244769
Med019	2month	2	19	74	1	1	1	12541.5	12.54	93.363	26.7468	11.2498	0.0677053	1.37338	53.7833	0.141876	42.4291	3.74579	8.81449	9.93	0.0172271	0.607327	3.632	4.69346	0.00951148	0.708783	0.121591	5.71647	0	0	0	0	0	0	0.0428137	0.0248917	0.0609017	1.31248	10.6791	23.1268	0.585116	19.3923	3.12922	12.9383	0.65869	19.6518	6.05115	0.0583088	0.0835668
Med019	4month	3	19	74	1	1	1	13464.6	13.46	47.1501	20.3195	12.5766	0.610561	1.59354	11.8968	0.153042	25.5805	2.82405	6.09109	8.275	0.0220704	0.0806667	3.02667	6.84373	0.00993519	0.907884	0.178079	4.63699	0	0	0	0	0	0.1809	0.260421	0.16924	0.0889167	1.50462	0.488568	4.30092	0.347287	6.76002	0.0771817	5.05616	2.40449	4.04621	13.9965	0.0436579	0.0543841
Med020	BL	1	20	65	2	2	1	8051.38	8.05	265.533	180.354	47.6488	20.5833	2.36313	14.5552	0.0289026	12.6085	2.68392	12.1777	127.386	14.8401	8.26652	14.9998	25.7495	0.149228	0.919819	0.266173	20.4984	0.0656833	0	0	0	0	11.7766	8.6114	0.195283	0.949511	1.41362	0.901975	2.65101	1.093	9.90922	2.32017	5.15368	0.605645	0.929302	3.59975	0.0148671	0.0140355
Med020	2month	2	20	65	2	2	1	6581.27	6.58	252.021	187.4	52.9331	2.06536	0.48608	9.03967	0.097715	6.73562	2.05273	14.5976	139.484	5.96877	9.14107	16.1559	26.2981	0.0584667	1.68212	0.0264	24.808	0.06	0	0	0	0	0.4158	1.63925	0.0103125	0.0971	0.38898	0.47462	1.64448	0.705219	6.21535	0.32588	1.90096	0.0369883	1.2502	3.22159	0.056135	0.03178
Med020	4month	3	20	65	2	2	1	6694.7	6.69	56.2814	16.6057	15.454	18.4233	0.518541	5.27355	0.00616667	7.69552	3.90332	1.61647	0.0748	10.9361	0.0266667	0.0484	7.78767	0.100454	1.07918	0.332516	6.14021	0.014	0	0	0	0	1.46266	16.7247	0.235973	0.0645667	0.453974	0.20125	0.918811	0.323567	3.82992	0.09228	0.715826	0.127547	0.451347	6.30852	0.0037	0.00246667
Med021	BL	1	21	65	1	1	1	12204.9	12.2	169.138	29.8597	42.5025	19.7138	0.405537	9.82488	66.8318	11.5775	6.06092	6.68218	13.5841	1.04878	0.88912	1.59456	26.6794	0.00288222	4.34093	0.545444	10.9285	0.00528	0	0	0	0	11.9407	7.41773	0.355333	0.0387119	0.366825	3.7777	1.2081	0.271309	4.56777	0.33984	1.04792	0.219213	0.376546	9.594	26.4112	34.1661
Med021	2month	2	21	65	1	1	1	10072.1	10.07	169.973	41.8409	56.0368	14.4539	1.36317	13.9716	42.3067	6.4139	36.6592	4.93719	0	0.158193	0.0863333	0	30.3113	0.0102963	2.03054	0.881926	22.8027	0	0	0	0	0	9.08333	5.29019	0.0803417	0.0564583	1.30671	0.856988	2.08019	0.673434	10.361	1.15821	3.68268	0.1147	1.2544	0.203917	16.5914	21.6262
Med021	4month	3	21	65	1	1	1	10852.4	10.85	47.7872	10.7415	25.3986	0.671665	2.38195	8.29378	0.299612	22.5762	2.9532	7.14467	0	0.643667	0	0	10.0367	0.238533	0.411802	0.0468	14.6554	0.00933333	0	0	0	0	0	0.640563	0.0311025	0.100161	2.28179	0.337022	2.93873	0.436769	4.58126	2.55017	6.30417	0.676392	0.697869	12.3476	0.083912	0.0617002
Med022	BL	1	22	71	1	1	1	10255.9	10.26	297.56	151.688	87.0533	47.5817	0.504142	10.681	0.0518067	5.39511	2.06756	13.0341	101.937	15.9891	6.63057	12.03	55.8436	0.105161	0.894278	0.276389	29.875	0.0589	0	0	0	0	21.3223	25.1805	1.07893	0.104997	0.399146	0.04455	0.866133	0.678956	9.09134	0.0584593	4.26405	0.0415633	0.567196	0.463833	0.0261833	0.0256233
Med022	2month	2	22	71	1	1	1	10033.8	10.03	317.904	211.204	54.7277	36.2859	1.7252	13.8621	0.098603	8.48542	3.02586	14.3341	150.143	16.3119	9.79815	17.5915	28.898	0.115938	1.06361	0.281484	24.2596	0.109096	0	0	0	0	28.0821	6.23621	1.96762	0.928653	0.796551	0.63848	1.25428	1.05294	10.9164	1.80471	4.46206	0.0478333	1.15642	1.01438	0.040118	0.058485
Med022	4month	3	22	71	1	1	1	9553.7	9.55	185.741	113.225	28.7839	34.2669	3.17758	6.22744	0.0598536	6.45333	2.61477	6.26163	71.1538	20.896	5.20903	7.08983	14.0719	0.216308	0.953313	0.0924	13.4051	0.045	0	0	0	0	23.2642	8.53581	2.46691	1.49729	1.6803	0.224393	0.787925	0.45455	4.76057	0.105323	4.0015	0.100717	0.329953	1.91583	0.0273879	0.0324657
Med023	BL	1	23	69	1	2	1	7511.89	7.51	824.337	585.351	137.004	77.5143	1.39709	23.0435	0.0274571	8.64252	1.28607	42.4065	447.286	12.8392	28.9724	52.5605	73.415	0.0992317	0.53339	0.0568333	62.6167	0.282687	0	0	0	0	50.7183	26.6005	0.1955	0.312731	1.08436	0.195585	2.18823	2.06732	18.5924	2.47421	4.64963	0.286913	0.606597	0.625167	0.0130119	0.0144452
Med023	2month	2	23	69	1	2	1	12516.2	12.52	644.423	407.434	99.5826	122.218	1.22493	13.9373	0.026272	5.70806	0.99961	30.0733	318.378	0.00207407	20.609	37.3725	55.0606	0.0165058	0.431405	0.170074	43.7803	0.12375	0	0	0	0	80.4371	41.5574	0.223312	0.292614	0.932321	0.139219	0.900883	1.80867	11.0885	0.90831	2.31759	0.563904	1.20838	0.709867	0.013136	0.013136
Med023	4month	3	23	69	1	2	1	5801.4	5.8	139.462	95.6699	28.4667	12.6039	0.153174	2.5511	0.0171333	2.5502	2.61619	6.885	72.8946	0	4.7175	8.55667	14.9769	0.00354167	0.02125	0	13.4367	0.0283333	0	0	0	0	10.062	2.40196	0.139967	0.0612617	0.0919122	0.031875	0.11483	0.367059	2.03734	0.724557	1.58056	0.104268	0.0823293	0.0584833	0.00823333	0.0089
Med024	BL	1	24	76	2	2	2	9668.7	9.67	246.327	4.48327	225.778	0.452933	0.905095	14.7051	0.00271429	9.40812	0	4.48327	0	0	0	0	166.979	0	0	0	58.799	0	0	0	0	0	0	0.452933	0	0.0192381	0.885857	0	1.66598	0.0889	12.9502	2.43915	4.84578	0.349125	0.967392	0.806667	0.00135714	0.00135714
Med024	2month	2	24	76	2	2	2			0	0	0	0	0	0	0	0
Med024	4month	3	24	76	2	2	2			0	0	0	0	0	0	0	0
Med025	BL	1	25	68	1	2	1	7135.18	7.14	133.243	78.9862	33.6833	13.2978	0.0811256	7.18959	0.00488	4.18129	1.2568	17.5011	50.9404	0.00355556	3.3047	5.9796	13.6663	0.00425278	0.595294	0.291556	19.0051	0.1208	0	0	0	0	5.92924	7.1978	0.1708	0.03678	0.0443456	0.022275	2.85303	0.252116	4.06217	0.116897	0.97802	0.321717	0.887063	1.87759	0.000303333	0.00457667
Med025	2month	2	25	68	1	2	1	10794.8	10.79	48.369	10.7801	22.1187	0.840933	0.0248444	14.5935	0.0108667	7.11147	3.86786	6.90084	0	0.00351111	0.0079	0	6.45091	0.00175556	3.28986	0.287911	11.4149	0.673333	0	0	0	0	0	0.569267	0.271667	0.0173333	0.00751111	2.8688	7.86428	0.272428	3.58799	1.72327	3.94422	0	0.990223	0.45375	0	0.0108667
Med025	4month	3	25	68	1	2	1	8213.6	8.21	135.176	75.5777	37.9936	5.77359	0.364739	15.4002	0.0661667	6.08189	1.97763	13.3648	50.9404	0.00567407	3.30947	5.9796	17.2215	0.00531204	1.27114	0.465274	18.4505	0.5798	0	0	0	0	3.55637	1.07041	1.1468	0.111535	0.253204	0.022275	8.43565	0.455281	6.48696	0.204974	0.868249	0.19845	0.33372	4.4765	0.0294	0.0367667
Med026	BL	1	26				3			0	0	0	0	0	0	0	0
[truncated: 440 more rows]
[truncated: 1 more columns]
