# Supplementary material for: Older Australians Can Achieve High Adherence to the Mediterranean Diet during a 6 Month Randomised Intervention; Results from the Medley Study
Source: Nutrients. 2017 May 24;9(6):534. doi: 10.3390/nu9060534 (PMC5490513; doi:10.3390/nu9060534)
Supplement: Supplementary file 1 [file nutrients-09-00534-s001.zip › Supplementary File 2, Table S2.pdf]

**Table S2.** Cut-offs used to score adherence at baseline, 2 and 4 months for the MedLey study

| 15-point adherence score |         |         | 10-point MDS <sup>1</sup> |       | 10-point MDS <sup>2</sup> |       |         |
|--------------------------|---------|---------|---------------------------|-------|---------------------------|-------|---------|
| Foods (g/MJ)             | MedDiet | HabDiet | Foods (g)                 | males | females                   | males | females |
| Extra virgin olive oil   | 0.3     | 0.6     | MUFA:SFA                  | 0.94  | 1.07                      | 1.7   | 1.7     |
| Vegetables               | 18.2    | 19.0    | Vegetables                | 186.5 | 198.3                     | 549.9 | 499.6   |
| Potatoes                 | 4.8     | 5.5     | Fruits and nuts           | 342.3 | 291.3                     | 362.5 | 356.3   |
| Fruits                   | 30.6    | 31.1    | Legumes                   | 0.0   | 0.0                       | 9.1   | 6.7     |
| Nuts                     | 1.9     | 1.7     | Cereals                   | 175.3 | 135.2                     | 177.7 | 139.7   |
| Legumes                  | 2.1     | 1.7     | Fish                      | 33.3  | 31.7                      | 23.7  | 18.8    |
| Bread                    | 8.3     | 9.5     | Meat and poultry          | 138   | 123.3                     | 120.8 | 89.8    |
| Cereals                  | 8.2     | 7.7     | Dairy                     | 176.3 | 197.5                     | 196.7 | 191.1   |
| Dairy                    | 30.4    | 32.2    | Ethanol                   | 10-50 | 5-25                      | 10-50 | 5-25    |
| Fish and seafood         | 4.2     | 6.5     |                           |       |                           |       |         |
| Eggs                     | 2.5     | 2.9     |                           |       |                           |       |         |
| Meats                    | 8.0     | 8.8     |                           |       |                           |       |         |
| Red wine                 | 8.7     | 11.9    |                           |       |                           |       |         |
| Sugars                   | 1.3     | 1.3     |                           |       |                           |       |         |
| Miscellaneous foods      | 32.1    | 34.5    |                           |       |                           |       |         |

<sup>1</sup>Using baseline sex-specific medians.

<sup>2</sup>Using baseline sex-specific medians from the Greek cohort in the EPIC study, from Trichopoulou et al [1] MedLey, Mediterranean diet for cognitive and cardiovascular health in the elderly; MDS, Mediterranean diet score; MedDiet, Mediterranean diet group; HabDiet, Habitual diet group; MUFA:SFA, monounsaturated to saturated fat ratio.

## Supplementary References

1. Trichopoulou, A.; Costacou, T.; Bamia, C.; Trichopoulos, D. Adherence to a Mediterranean diet and survival in a Greek population. *N. Engl. J. Med.* **2003**, *348*, 2599-2608. DOI: none.
