# Supplementary material for: Older Australians Can Achieve High Adherence to the Mediterranean Diet during a 6 Month Randomised Intervention; Results from the Medley Study
Source: Nutrients. 2017 May 24;9(6):534. doi: 10.3390/nu9060534 (PMC5490513; doi:10.3390/nu9060534)
Supplement: Supplementary file 1 [file nutrients-09-00534-s001.zip › Supplementary File 3, Table S3.pdf]

**Table S3.** Nutrient intakes by gender and diet group at baseline and 4 months, compared with Australian estimated average requirements/adequate intakes

| Nutrients                                     | MedDiet (n=80) |               |               |               | HabDiet (n=70) |               |               |               | Recommendations         |
|-----------------------------------------------|----------------|---------------|---------------|---------------|----------------|---------------|---------------|---------------|-------------------------|
|                                               | Baseline       |               | 4 months      |               | Baseline       |               | 4 months      |               |                         |
|                                               | Males          | Females       | Males         | Females       | Males          | Females       | Males         | Females       |                         |
| kJ from protein (%)                           | 18.3±3.6       | 20.1±3.2      | 19.4±2.8      | 19.4±3.3      | 18.7±3.4       | 19.5±3.3      | 19.2±4.0      | 19.2±3.4      | 15-25%                  |
| kJ from fat (%)                               | 33.6±6.6       | 33.6±5.3      | 37.2±7.7      | 40.0±7.0      | 33.6±6.9       | 35.1±4.5      | 34.9±3.9      | 36.2±6.7      | 20-35%                  |
| kJ from saturated fat (%)                     | 12.5±2.8       | 11.8±2.7      | 8.7±1.9       | 9.3±1.8       | 12.8±3.6       | 12.9±2.5      | 12.8±2.8      | 13.2±3.7      | <10%                    |
| kJ from monounsaturated fat (%)               | 13.1±4.3       | 13.2±2.5      | 19.1±4.8      | 20.2±4.6      | 12.8±3.6       | 13.6±3.3      | 13.8±2.7      | 14.6±4.2      | NA                      |
| kJ from carbohydrate (%)                      | 40.7±3.9       | 39.5±6.9      | 35.5±5.3      | 34.1±6.0      | 39.2±8.5       | 39.5±5.1      | 37.1±6.0      | 38.4±7.7      | 45-65%                  |
| kJ from alcohol (%)                           | 3.4±3.4        | 2.7±3.2       | 3.4±3.8       | 2.3±2.2       | 4.6±6.1        | 2.2±2.8       | 5.0±5.0       | 2.3±2.8       | NA                      |
| Cholesterol (mg)                              | 337.4±158.3    | 288.8±182.6   | 221.8±88.6    | 224.5±92.6    | 278.4±131.0    | 316.8±122.8   | 297.5±117.9   | 295.3±142.2   | NA                      |
| Fibre (g) <sup>2</sup>                        | 35.4±15.5      | 27.4±6.5      | 37.6±14.6     | 30.9±9.7      | 27.9±9.6       | 28.2±6.9      | 25.1±9.4      | 26.2±7.2      | M 30 g<br>F 25 g        |
| Vitamin C (mg)                                | 151.6±89.1     | 148.6±87.5    | 180.8±79.0    | 155.7±74.0    | 141.2±69.6     | 132.5±71.3    | 124.4±91.2    | 117.8±55.0    | 30 mg                   |
| Vitamin E (mg) <sup>2</sup>                   | 12.7±8.4       | 10.0±3.5      | 17.8±6.2      | 16.8±5.4      | 10.2±4.4       | 11.0±4.3      | 10.3±3.4      | 11.3±6.0      | M 10 mg<br>F 7 mg       |
| Total folate (µg)                             | 582.7±289.8    | 407.1±119.1   | 546.7±169.7   | 446.6±127.2   | 448.8±188.4    | 413.8±153.2   | 374.0±142.1   | 399.9±154.2   | 320 mg                  |
| Total vitamin A equivalents (µg) <sup>2</sup> | 1107.7±522.7   | 1472.6±2077.0 | 1197.4±1055.4 | 1244.4±816.7  | 933±456.1      | 1163.6±615.3  | 1072.3±1261.3 | 1473.0±2497.9 | M 625 µg<br>F 500 µg    |
| β-carotene equivalents (µg)                   | 4553.3±3106.1  | 5374.8±3968.6 | 6234.2±6410.9 | 6660.1±5043.8 | 3601.1±2590.2  | 4593.5±2865.6 | 2787.3±1940.7 | 4725.2±3247.7 | NA                      |
| Sodium (mg) <sup>2</sup>                      | 2673.7±888.1   | 2094.2±733.3  | 2095.5±763.6  | 1565.6±452.9  | 2306.7±967.8   | 2330.9±806.4  | 2214.6±633.6  | 2106.5±664.5  | 460-920 mg              |
| Potassium (mg) <sup>2</sup>                   | 4325.3±1819.8  | 3604.1±804.4  | 4199.0±1069.9 | 3612.0±832.1  | 3619.4±1032.6  | 3713.3±743.2  | 32229.2±839.9 | 3416.6±781.7  | 2800 mg                 |
| Magnesium (mg)                                | 491.6±184.5    | 403.7±110.1   | 494.2±135.4   | 407.7±100.0   | 414.8±121.2    | 421.6±110.1   | 389.2±133.6   | 381.7±100.1   | M 350 mg<br>F 265 mg    |
| Calcium (mg)                                  | 990.3±418.6    | 920.1±336.0   | 1020.4±319.5  | 855.6±225.1   | 893.3±409.8    | 988.2±331.5   | 848.8±374.7   | 885.4±318.6   | M 840 mg (>70y 1100 mg) |

|                                                |             |             |             |             |             |             |             |             |            |
|------------------------------------------------|-------------|-------------|-------------|-------------|-------------|-------------|-------------|-------------|------------|
|                                                |             |             |             |             |             |             |             |             | F 1,100 mg |
| Iron (mg)                                      | 16.6±6.8    | 12.5±2.9    | 15.6±4.0    | 12.3±2.7    | 13.5±4.7    | 12.3±2.6    | 13.9±5.4    | 11.0±2.8    | M 6 mg     |
| Zinc (mg)                                      | 13.9±5.0    | 11.4±3.4    | 12.1±3.5    | 9.9±2.4     | 12.3±4.2    | 11.5±3.3    | 13.1±4.2    | 11.4±4.6    | F 5 mg     |
| Total long-chain<br>n3 (mg) <sup>2</sup>       | 495.4±609.2 | 523.2±586.4 | 800.8±647.0 | 935.8±819.4 | 477.0±558.5 | 562.8±702.1 | 432.7±610.4 | 336.6±500.2 | M 12 mg    |
| Linoleic acid<br>(18:2n-6) (g) <sup>2</sup>    | 12.7±7.6    | 10.7±5.6    | 15.7±7.3    | 14.8±5.4    | 11.4±4.9    | 11.3±4.8    | 11.5±5.8    | 10.3±4.3    | F 6.5 mg   |
| α-linolenic acid<br>(18:5n-3) (g) <sup>2</sup> | 1.5±0.6     | 1.4±0.8     | 1.9±2.0     | 1.4±0.6     | 1.3±0.6     | 1.7±0.8     | 1.3±0.5     | 1.2±0.5     | M 160 mg   |
| Total flavonoids<br>(mg)                       | 668.0±794.9 | 506.8±400.2 | 612.0±492.0 | 560.4±381.6 | 522.9±447.1 | 600.0±454.1 | 441.2±330.3 | 531.5±397.0 | F 90 mg    |
| Anthocyanidins<br>(mg)                         | 88.3±99.8   | 57.2±81.8   | 99.9±87.3   | 79.2±72.2   | 88.0±120.5  | 58.8±67.6   | 60.2±78.5   | 48.8±54.8   | M 13 g     |
| Flavan-3-ols (mg)                              | 514.0±777.3 | 393.3±366.5 | 446.9±468.9 | 423.1±355.3 | 371.4±397.2 | 486.7±429.7 | 340.1±315.4 | 442.6±398.3 | F 8 g      |
| Flavanones (mg)                                | 28.3±32.6   | 22.7±25.1   | 22.9±23.7   | 20.0±26.7   | 26.2±29.0   | 19.1±24.7   | 17.4±23.4   | 9.2±15.6    | M 1.3 g    |
| Flavones (mg)                                  | 3.8±13.0    | 6.7±33.5    | 9.0±26.9    | 5.7±12.3    | 10.4±45.8   | 5.3±18.0    | 0.9±0.8     | 3.5±11.0    | F 0.8 g    |
| Flavonols (mg)                                 | 30.4±28.3   | 25.8±18.0   | 31.6±21.0   | 31.0±13.8   | 26.3±19.2   | 27.8±17.3   | 22.1±13.0   | 26.0±14.1   | NA         |
| Isoflavones (mg)                               | 3.2±12.3    | 1.2±3.2     | 1.7±5.5     | 2.6±7.9     | 0.6±1.8     | 2.2±8.1     | 0.6±2.3     | 1.4±5.0     | NA         |
| Carotenoids (mg)                               | 15.0±9.6    | 13.7±9.5    | 17.6±14.8   | 18.2±11.4   | 10.5±7.8    | 13.0±7.2    | 8.8±7.0     | 11.6±7.2    | NA         |

Values are mean±SD

<sup>1</sup>Nutrient Reference Values: estimated average requirement estimates the nutrient intake per day likely to meet the needs of 50% of age and gender specific population. Estimated average requirements for older Australians (aged 51-70 and >70 years) reported. Where no estimated average requirement has been set, the adequate intake has been used. For macronutrients, the acceptable macronutrient distribution range is displayed.

<sup>2</sup>Adequate intake used

EAR=estimated average requirement. NA=not applicable
